# Supplementary material for: Pharmacological Mechanisms Underlying the Hepatoprotective Effects of Ecliptae herba on Hepatocellular Carcinoma
Source: Evid Based Complement Alternat Med. 2021 Jul 16;2021:5591402. doi: 10.1155/2021/5591402 (PMC8302389; doi:10.1155/2021/5591402)
Supplement: Supplementary Materials — Supplementary File S1: a total of 48 chemical ingredients of EH were obtained from TCMSP. Supplementary File S2: detailed information of the targets of 6 active ingredients in EH was extracted from three databases, TCMSP, DGIDB, and SwissTargetPrediction. Supplementary File S3: detailed information on HCC-related targets was extracted from GeneCards and CTD. Supplementary File S4: detailed information on the PPI network of 52 potential therapeutic targets for HCC was obtained from the STRING platform. Supplementary File S5: topological parameters of nodes in the E-H network obtained from Cytoscape. Supplementary File S6: detailed information on GO enrichment analysis obtained from WebGestalt. Supplementary File S7: detailed information on the top 10 GO terms of the GO network in the TCGA RNASeq LIHC database through Network Topology-based Analysis obtained from WebGestalt. Supplementary File S8: detailed information on the top 20 KEGG enrichment pathways obtained from the WebGestalt. Supplementary File S9: detailed information on the C-T-P network obtained from Cytoscape. [file 5591402.f1.zip › 5591402.f1/Supplementary File S1.pdf]

**Supplementary File S1.** A total of 48 chemical ingredients of EH were collected from TCMSP

| MOL ID    | NAME                                                                       | MW       | ALogP | Hdon | Hacc | OB(%) | Caco-2 | BBB   | DL   | FASA | HL    |
|-----------|----------------------------------------------------------------------------|----------|-------|------|------|-------|--------|-------|------|------|-------|
| MOL000103 | PHB                                                                        | 138.13   | 1.17  | 2    | 3    | 30.15 | 0.39   | 0.21  | 0.03 | 0.45 | 11.77 |
| MOL000105 | protocatechuic acid                                                        | 154.13   | 0.9   | 3    | 4    | 25.37 | 0.1    | -0.17 | 0.04 | 0.43 | NA    |
| MOL001790 | Linarin                                                                    | 592.6    | -0.18 | 7    | 14   | 39.84 | -1.68  | -2.77 | 0.71 | 0.27 | 16.07 |
| MOL001689 | acacetin                                                                   | 284.28   | 2.59  | 2    | 5    | 34.97 | 0.67   | -0.05 | 0.24 | 0.35 | 17.25 |
| MOL001899 | ZINC02169908                                                               | 268.54   | 6.2   | 0    | 1    | 23.3  | 1.42   | 1.24  | 0.1  | 0.23 | NA    |
| MOL000009 | luteolin-7-o-glucoside                                                     | 448.41   | 0.16  | 7    | 11   | 7.29  | -1.23  | -2.49 | 0.78 | 0.32 | NA    |
| MOL002854 | (1R,2R,4R)-Dihydrocarveol                                                  | 154.28   | 2.58  | 1    | 1    | 51.17 | 1.32   | 1.63  | 0.03 | 0.26 | 11.33 |
| MOL002975 | butin                                                                      | 272.27   | 2.3   | 3    | 5    | 69.94 | 0.3    | -0.4  | 0.21 | 0.4  | 16.8  |
| MOL003375 | .alpha.-T COOH deriv.                                                      | 292.42   | 4.91  | 1    | 2    | 24.52 | 0.82   | 0.5   | 0.13 | 0.12 | NA    |
| MOL003376 | 2-(Buta-1,3-dienyl)-5-(4-chloro-3-hydroxybut-1-ynyl) thiophene             | 234.71   | 4.47  | 1    | 1    | 29.61 | 1.3    | 0.49  | 0.06 | 0.46 | NA    |
| MOL003377 | Demethylwedelolactone-7-glucoside                                          | 462.39   | 0.57  | 7    | 12   | 14.45 | -1.5   | -2.76 | 0.92 | 0.3  | NA    |
| MOL003378 | 1,3,8,9-tetrahydroxybenzofurano[3,2-c]chromen-6-one                        | 300.23   | 2.48  | 4    | 7    | 33.94 | 0.01   | -0.65 | 0.43 | 0.34 | 9.62  |
| MOL003379 | Demissine                                                                  | 1,018.34 | -0.95 | 12   | 21   | 10.71 | -3.46  | -4.29 | 0.02 | 0.2  | NA    |
| MOL003380 | Demissine_qt                                                               | 399.73   | 5.52  | 1    | 2    | 16.02 | 1.25   | 0.89  | 0.75 | 0.17 | NA    |
| MOL003381 | Ecliptasaponin B                                                           | 959.26   | -0.08 | 12   | 19   | 1.64  | -3.4   | -4.38 | 0.06 | 0.25 | NA    |
| MOL003382 | Ecliptasaponin B_qt                                                        | 472.78   | 5.32  | 3    | 4    | 17.26 | 0.18   | -0.43 | 0.74 | 0.25 | NA    |
| MOL003383 | Ecliptasaponin D                                                           | 634.94   | 3.57  | 6    | 9    | 5.81  | -1.03  | -1.74 | 0.34 | 0.26 | NA    |
| MOL003384 | Ecliptasaponin D_qt                                                        | 472.78   | 5.32  | 3    | 4    | 16.43 | 0.14   | -0.65 | 0.74 | 0.25 | NA    |
| MOL003385 | Ecliptasaponin                                                             | 634.94   | 3.57  | 6    | 9    | 17.72 | -0.97  | -1.8  | 0.34 | 0.23 | NA    |
| MOL003386 | Ecliptasaponin_qt                                                          | 472.78   | 5.32  | 3    | 4    | 17.47 | 0.22   | -0.4  | 0.74 | 0.25 | NA    |
| MOL003387 | 3-[(2S)-2,3-dihydroxy-3-methyl-butyl]-4-methoxy-1-methyl-carbostyrl        | 291.38   | 0.71  | 2    | 5    | 15.4  | 0.25   | -0.01 | 0.19 | 0.27 | NA    |
| MOL003388 | Isodesacetylutaricin                                                       | 396.58   | 3.43  | 2    | 6    | 28.16 | -0.25  | -0.64 | 0.48 | 0.24 | NA    |
| MOL003389 | 3'-O-Methylorobol                                                          | 300.28   | 2.05  | 3    | 6    | 57.41 | 0.45   | -0.38 | 0.27 | 0.32 | 17.31 |
| MOL001232 | TES                                                                        | 288.47   | 3.33  | 1    | 2    | 12.93 | 0.68   | 0.29  | 0.35 | 0.26 | NA    |
| MOL003391 | alpha-Terthienyl methyl acetate                                            | 320.48   | 5.08  | 0    | 2    | 33.61 | 1.09   | 0.8   | 0.17 | 0.06 | -1.88 |
| MOL003392 | .alpha.-T OHMe deriv.                                                      | 278.44   | 4.71  | 1    | 1    | 29.97 | 0.99   | 0.52  | 0.11 | 0.03 | NA    |
| MOL003393 | (1S,4S)-7-isopropylidene-1,4-dimethyl-2,3,4,5,6,8-hexahydro-1H-azulene     | 204.39   | 5.13  | 0    | 0    | 24.38 | 1.86   | 2.07  | 0.07 | 0.23 | NA    |
| MOL003394 | Benzo[4,5-f]coumarin                                                       | 236.23   | 3.55  | 0    | 3    | 29.11 | 1.22   | 0.73  | 0.25 | 0.41 | NA    |
| MOL003395 | (3S,8S,9S,10R,13R,14S,17R)-17-[(1R,4R)-1,4-dimethylhexyl]-10,13-dimethyl-2 | 386.73   | 7.38  | 1    | 1    | 11.33 | 1.45   | 1.19  | 0.67 | 0.21 | NA    |
| MOL003396 | echinocystic acid                                                          | 472.78   | 5.32  | 3    | 4    | 24.43 | 0.09   | -0.43 | 0.74 | 0.24 | NA    |
| MOL003397 | (3S,8S,9S,10R,13R,14S,17R)-17-[(E,1R,4R)-1,4-dimethylhex-2-enyl]-10,13-dim | 384.71   | 6.93  | 1    | 1    | 15.33 | 1.43   | 1.06  | 0.68 | 0.22 | NA    |
| MOL003398 | Pratensein                                                                 | 299.27   | 1.37  | 2    | 6    | 39.06 | 0.39   | -0.09 | 0.28 | 0.06 | 17.13 |
| MOL003399 | Caulophyllogenin                                                           | 488.78   | 4.23  | 4    | 5    | 29.74 | -0.37  | -0.9  | 0.72 | 0.23 | NA    |
| MOL003400 | Ecliptasaponin A                                                           | 634.94   | 3.57  | 6    | 9    | 8.62  | -1.11  | -1.84 | 0.34 | 0    | NA    |
| MOL003401 | Ecliptasaponin A_qt                                                        | 472.78   | 5.32  | 3    | 4    | 15.58 | 0.18   | -0.44 | 0.74 | 0    | NA    |
| MOL003402 | demethylwedelolactone                                                      | 302.25   | 1.1   | 4    | 7    | 72.13 | 0.04   | -0.69 | 0.43 | 0.34 | 9.17  |
| MOL003403 | nicotine                                                                   | 162.26   | 1.24  | 0    | 2    | 77.67 | 1.38   | 1.53  | 0.04 | 0.25 | 3.99  |
| MOL003404 | wedelolactone                                                              | 314.26   | 2.73  | 3    | 7    | 49.6  | 0.32   | -0.45 | 0.48 | 0.29 | 9.61  |
| MOL003405 | Chloromaloside                                                             | 1,345.61 | -5.6  | 18   | 32   | 7.59  | -5.42  | -6.94 | 0.01 | 0.23 | NA    |
| MOL003406 | Chloromaloside_qt                                                          | 448.71   | 2.98  | 3    | 5    | 11.87 | -0.27  | -1.1  | 0.86 | 0.24 | NA    |
| MOL000361 | Amyrin                                                                     | 426.8    | 7.3   | 1    | 1    | 17.6  | 1.45   | 1.29  | 0.76 | 0.22 | NA    |
| MOL000421 | nicotinic acid                                                             | 123.12   | 0.28  | 1    | 3    | 47.65 | 0.34   | 0.21  | 0.02 | 0    | 11.98 |
| MOL000460 | (Z)-1-(2,4-dihydroxyphenyl)-3-(3,4-dihydroxyphenyl)prop-2-en-1-one         | 272.27   | 2.63  | 4    | 5    | 83.78 | 0.1    | -0.46 | 0.17 | 0    | 19.88 |
| MOL002003 | (-)-Caryophyllene oxide                                                    | 220.39   | 3.52  | 0    | 1    | 32.67 | 1.58   | 1.76  | 0.13 | 0.28 | 6.51  |
| MOL000006 | luteolin                                                                   | 286.25   | 2.07  | 4    | 6    | 36.16 | 0.19   | -0.84 | 0.25 | 0.39 | 15.94 |
| MOL000007 | Cosmetin                                                                   | 432.41   | 0.43  | 6    | 10   | 9.68  | -1.08  | -2.26 | 0.74 | 0.32 | NA    |
| MOL000008 | apigenin                                                                   | 270.25   | 2.33  | 3    | 5    | 23.06 | 0.43   | -0.61 | 0.21 | 0.41 | NA    |
| MOL000098 | quercetin                                                                  | 302.25   | 1.5   | 5    | 7    | 46.43 | 0.05   | -0.77 | 0.28 | 0.38 | 14.4  |
