# Supplementary material for: Pharmacological Mechanisms Underlying the Hepatoprotective Effects of Ecliptae herba on Hepatocellular Carcinoma
Source: Evid Based Complement Alternat Med. 2021 Jul 16;2021:5591402. doi: 10.1155/2021/5591402 (PMC8302389; doi:10.1155/2021/5591402)
Supplement: Supplementary Materials — Supplementary File S1: a total of 48 chemical ingredients of EH were obtained from TCMSP. Supplementary File S2: detailed information of the targets of 6 active ingredients in EH was extracted from three databases, TCMSP, DGIDB, and SwissTargetPrediction. Supplementary File S3: detailed information on HCC-related targets was extracted from GeneCards and CTD. Supplementary File S4: detailed information on the PPI network of 52 potential therapeutic targets for HCC was obtained from the STRING platform. Supplementary File S5: topological parameters of nodes in the E-H network obtained from Cytoscape. Supplementary File S6: detailed information on GO enrichment analysis obtained from WebGestalt. Supplementary File S7: detailed information on the top 10 GO terms of the GO network in the TCGA RNASeq LIHC database through Network Topology-based Analysis obtained from WebGestalt. Supplementary File S8: detailed information on the top 20 KEGG enrichment pathways obtained from the WebGestalt. Supplementary File S9: detailed information on the C-T-P network obtained from Cytoscape. [file 5591402.f1.zip › 5591402.f1/Supplementary File S2.pdf]

| Luteolin    |           |                       |  | Quercetin |         |                       |  | Demethylwedelolactone |            |                       |
|-------------|-----------|-----------------------|--|-----------|---------|-----------------------|--|-----------------------|------------|-----------------------|
| TCMSP       | DGIdb     | SwissTargetPrediction |  | TCMSP     | DGIdb   | SwissTargetPrediction |  | TCMSP                 | DGIdb      | SwissTargetPrediction |
| MET         | HPGD      | NOX4                  |  | PTGS1     | ESR2    | NOX4                  |  | PTGS2                 | MAPK3      | ESR2                  |
| PTGS1       | KDM4E     | AKR1B1                |  | AR        | HSF1    | AVPR2                 |  | GSK3B                 | MMP9       | ESR1                  |
| AR          | CYP3A4    | CDK5R1 CDK5           |  | PPARG     | PIK3R5  | AKR1B1                |  | HSP90                 | NFKBI<br>A | ALOX5                 |
| PTGS2       | GAA       | XDH                   |  | PTGS2     | NR1I2   | XDH                   |  |                       | MAPK1      | CBR1                  |
| PRSS1       | FEN1      | MAOA                  |  | NCOA2     | PIK3CG  | MAOA                  |  |                       | MMP2       | GSR                   |
| NCOA2       | RAPGEF3   | FLT3                  |  | AKR1B1    | APEX1   | IGF1R                 |  |                       |            | SRC                   |
| RELA        | POLI      | CA2                   |  | PRSS1     | HSPB1   | FLT3                  |  |                       |            | CCND1                 |
| EGFR        | TNFRSF10B | CCNB3                 |  | KCNH2     | FEN1    | CYP19A1               |  |                       |            | PDGFRB                |
| AKT1        | POLB      | ALOX5                 |  | SCN5A     | F2      | EGFR                  |  |                       |            | FLT4                  |
| VEGFA       | NFKB1     | ADORA1                |  | ADRB2     | PRKCA   | F2                    |  |                       |            | CDK2                  |
| CCND1       | SMN1      | CA7                   |  | MMP3      | GABPA   | CA2                   |  |                       |            | PLK4                  |
| BCL2L1      | RECQL     | GLO1                  |  | F7        | PRKD1   | PIM1                  |  |                       |            | TEK                   |
| CDKN1<br>A  | CYP1A2    | APP                   |  | RXRA      | CYP2C19 | ALOX5                 |  |                       |            | AURKA                 |
| CASP9       | SMN2      | SYK                   |  | ACHE      | PIK3CB  | AURKB                 |  |                       |            | MAP3K8                |
| MMP2        | ALOX15    | GSK3B                 |  | GABRA1    | ESR1    | DRD4                  |  |                       |            | BRAF                  |
| MMP9        | BAZ2B     | PARP1                 |  | MAOB      | NFKB2   | ADORA1                |  |                       |            | EPHB4                 |
| MAPK1       | BLM       | TTR                   |  | RELA      | E2F1    | CA7                   |  |                       |            | SQLE                  |
| IL10        | NFKB2     | MMP9                  |  | EGFR      | CYP3A4  | GLO1                  |  |                       |            | FGR                   |
| RB1         | WRN       | CA12                  |  | AKT1      | NFKB1   | MPO                   |  |                       |            | LYN                   |
| TNFSF1<br>5 | EHMT2     | MMP2                  |  | VEGFA     | PRKCQ   | PIK3R1                |  |                       |            | AKR1B1                |
| JUN         | MAPT      | CA4                   |  | CCND1     | HCK     | ADORA2A               |  |                       |            | HSPA1A                |
| IL6         | RELA      | MMP12                 |  | BCL2      | PIK3CA  | DAPK1                 |  |                       |            | FASN                  |
| CASP3       | HSD17B10  | CD38                  |  | BCL2L1    | APOB    | PYGL                  |  |                       |            | CSNK2A1               |
| TP63        | KDM4A     | CYP1B1                |  | FOS       | BAX     | CA1                   |  |                       |            | GPR35                 |
| NFKBIA      | GPR35     | ABCG2                 |  | CDKN1A    | DRD1    | GSK3B                 |  |                       |            | EGFR                  |
| TOP1        | TYR       | AKR1B10               |  | EIF6      | CEBPB   | SRC                   |  |                       |            | TNNC1                 |
| MDM2        | POLK      | TNKS2                 |  | BAX       | GALK1   | PTK2                  |  |                       |            | IGF1R                 |

|        |         |         |  |         |          |         |  |  |  |           |
|--------|---------|---------|--|---------|----------|---------|--|--|--|-----------|
| APP    | ALOX15B | TNKS    |  | CASP9   | ATP5C1   | HSD17B2 |  |  |  | CA2       |
| MMP1   | ALDH1A1 | TOP1    |  | PLAU    | CDC25C   | KDR     |  |  |  | AURKB     |
| PCNA   | APEX1   | ARG1    |  | MMP2    | AHR      | MMP13   |  |  |  | CA7       |
| ERBB2  | CYBB    | PTPRS   |  | MMP9    | PRKCI    | MMP3    |  |  |  | CA1       |
| PPARG  | POLH    | ABCC1   |  | MAPK1   | PIK3R3   | CA3     |  |  |  | GSK3B     |
| HMOX1  |         | HSD17B1 |  | IL10    | GSR      | ALOX15  |  |  |  | PTK2      |
| CASP7  |         | ACHE    |  | EGF     | PRKCZ    | ABCC1   |  |  |  | KDR       |
| ICAM1  |         | CDK6    |  | RB1     | PRKD2    | PLK1    |  |  |  | PLK1      |
| MCL1   |         | ABCB1   |  | TNFSF15 | STK17B   | CA6     |  |  |  | CA6       |
| BIRC5  |         | HSD17B2 |  | JUN     | CYP1A1   | CDK1    |  |  |  | CA12      |
| IL2    |         | ALOX15  |  | IL6     | HSP90AA1 | MMP9    |  |  |  | CA14      |
| CCNB1  |         | ALOX12  |  | AHSA1   | ATP5B    | CA12    |  |  |  | CA9       |
| TYR    |         | ESR2    |  | CASP3   | KDM4E    | MMP2    |  |  |  | MET       |
| IFNG   |         | CYP19A1 |  | TP63    | ALOX15   | PKN1    |  |  |  | CA4       |
| IL4    |         | ADORA2A |  | ELK1    | PIK3CB   | CA14    |  |  |  | CA13      |
| TOP2A  |         | CSNK2A1 |  | NFKBIA  | XDH      | CA9     |  |  |  | AKT1      |
| GSTP1  |         | ESR1    |  | POR     | PRKCG    | CSNK2A1 |  |  |  | CA5A      |
| SLC2A4 |         | PTGS2   |  | ODC1    | POLK     | ALOX12  |  |  |  | BACE1     |
| INSR   |         | CFTR    |  | CASP8   | ATAD5    | MET     |  |  |  | NUAK1     |
| CD40LG |         | AMY1A   |  | TOP1    | PIK3C2G  | CA4     |  |  |  | XDH       |
| PTGES  |         | GRK6    |  | RAF1    | EHMT2    | NEK2    |  |  |  | INSR      |
| NUF2   |         | CDK2    |  | SOD1    | AVPR2    | CXCR1   |  |  |  | KCNMA1    |
| ADCY2  |         | TERT    |  | PRKCA   | UGT3A1   | CAMK2B  |  |  |  | ERBB2     |
|        |         | CA1     |  | MMP1    | CSNK2B   | ALK     |  |  |  | FNTA FNTB |
|        |         | CA9     |  | HIF1A   | PIK3R2   | AKT1    |  |  |  | NFKB1     |
|        |         | CDK1    |  | STAT1   | PRKD3    | ABCB1   |  |  |  | MAOA      |
|        |         | TYR     |  | RUNX1T1 | RECQL    | NEK6    |  |  |  | FEN1      |
|        |         | AHR     |  | ERBB2   | CBR1     | PLA2G1B |  |  |  | TERT      |
|        |         | ESRRA   |  | PPARG   | HPGD     | CA5A    |  |  |  | EIF4H     |
|        |         | GPR35   |  | ACACA   | HIF1A    | BACE1   |  |  |  | PABPC1    |
|        |         | DAPK1   |  | HMOX1   | PRKCB    | CYP1B1  |  |  |  | HSPA8     |
|        |         | AVPR2   |  | CYP3A4  | EIF3F    | AXL     |  |  |  | CDC25A    |

|  |  |         |  |              |         |          |  |  |  |          |
|--|--|---------|--|--------------|---------|----------|--|--|--|----------|
|  |  | IGF1R   |  | CYP1A2       | PKN3    | ABCG2    |  |  |  | CDC25B   |
|  |  | EGFR    |  | CAV1         | POLB    | NUAK1    |  |  |  | SNCA     |
|  |  | F2      |  | MYC          | PRKCD   | AKR1C2   |  |  |  | CA5B     |
|  |  | PIM1    |  | F3           | CYP19A1 | AKR1C1   |  |  |  | HSD17B3  |
|  |  | AURKB   |  | GJA1         | NQO2    | AKR1C3   |  |  |  | KCNA5    |
|  |  | DRD4    |  | CYP1A1       | ACTB    | AKR1C4   |  |  |  | KCNA3    |
|  |  | MPO     |  | ICAM1        | CSNK2A1 | CA13     |  |  |  | BCL2L1   |
|  |  | PIK3R1  |  | IL1B         | PKN2    | AKR1A1   |  |  |  | DAO      |
|  |  | PYGL    |  | CCL2         | TOP1    | GPR35    |  |  |  | DUSP3    |
|  |  | SRC     |  | SELE         | PIK3C2A | SYK      |  |  |  | DAPK1    |
|  |  | PTK2    |  | VCAM1        | MAPK3   | MAPT     |  |  |  | PIK3CG   |
|  |  | KDR     |  | PTGER3       | CD34    | KDM4E    |  |  |  | MPG      |
|  |  | MMP13   |  | CXCL8        | XDH     | TOP2A    |  |  |  | PIK3CA   |
|  |  | MMP3    |  | PRKCB        | POLH    | INSR     |  |  |  | SLC22A12 |
|  |  | CA3     |  | BIRC5        | MAPT    | ACHE     |  |  |  | IGFBP6   |
|  |  | PLK1    |  | DUOX2        | PKN1    | MYLK     |  |  |  | IGFBP4   |
|  |  | CA6     |  | NOS3         | MBP     | PIK3CG   |  |  |  | IGFBP5   |
|  |  | PKN1    |  | HSPB1        | PIK3CA  | APEX1    |  |  |  | IGFBP2   |
|  |  | CA14    |  | SULT1E1      | PIK3CD  | CDK5R1   |  |  |  | IGFBP3   |
|  |  | MET     |  | MGAM         | PIK3R1  | CCNB3    |  |  |  | IGFBP1   |
|  |  | NEK2    |  | IL2          | CYP2C9  | ARG1     |  |  |  | CYP1A2   |
|  |  | CXCR1   |  | NR1I2        | SF3B3   | PTPRS    |  |  |  | AVPR2    |
|  |  | CAMK2B  |  | CYP1B1       | PIK3CG  | ESR2     |  |  |  | F2       |
|  |  | ALK     |  | CCNB1        | GPR35   | MPG      |  |  |  | DRD4     |
|  |  | AKT1    |  | PLAT         | CYP1B1  | SLC22A12 |  |  |  | GLO1     |
|  |  | NEK6    |  | THBD         | UBA1    | CDK6     |  |  |  | MPO      |
|  |  | PLA2G1B |  | SERPINE<br>1 | PRKCE   | CDK2     |  |  |  | PIK3R1   |
|  |  | CA5A    |  | COL1A1       | HSPA2   | TYR      |  |  |  | PYGL     |
|  |  | BACE1   |  | IFNG         | TOP2A   | HSD17B1  |  |  |  | MMP13    |
|  |  | AXL     |  | ALOX5        | ALDH1A1 | AHR      |  |  |  | MMP3     |
|  |  | NUAK1   |  | IL1A         | CYP1A2  | ESRRA    |  |  |  | MMP9     |

|  |  |        |  |        |              |         |  |  |  |          |
|--|--|--------|--|--------|--------------|---------|--|--|--|----------|
|  |  | AKR1C2 |  | MPO    | ABL1         | APP     |  |  |  | MMP2     |
|  |  | AKR1C1 |  | TOP2A  | PIK3C3       | PARP1   |  |  |  | PKN1     |
|  |  | AKR1C3 |  | NCF1   | HIBCH        | TTR     |  |  |  | NEK2     |
|  |  | AKR1C4 |  | ABCG2  | HSD17B10     | MMP12   |  |  |  | HSP90AA1 |
|  |  | CA13   |  | HAS2   | PRKCH        | CD38    |  |  |  | CXCR1    |
|  |  | AKR1A1 |  | GSTP1  | POLI         | AKR1B10 |  |  |  | CAMK2B   |
|  |  | PFKFB3 |  | NFE2L2 | PON1         | TNKS2   |  |  |  | NEK6     |
|  |  | KDM4E  |  | NQO1   | PIK3C2B      | TNKS    |  |  |  | PLA2G1B  |
|  |  | PLG    |  | PARP1  | ALOX15B      | TOP1    |  |  |  | AKR1C2   |
|  |  | AR     |  | AHR    | MPHOSPH<br>8 | TERT    |  |  |  | AKR1C4   |
|  |  |        |  | PSMD3  | PIK3CA       |         |  |  |  |          |
|  |  |        |  | SLC2A4 | PIK3R4       |         |  |  |  |          |
|  |  |        |  | COL3A1 | BLM          |         |  |  |  |          |
|  |  |        |  | CXCL11 | RELA         |         |  |  |  |          |
|  |  |        |  | CXCL2  | YES1         |         |  |  |  |          |
|  |  |        |  | DCAF5  | PIK3R6       |         |  |  |  |          |
|  |  |        |  | NR1I3  | ATP5A1       |         |  |  |  |          |
|  |  |        |  | CHEK2  | RUVBL2       |         |  |  |  |          |
|  |  |        |  | INSR   | SHBG         |         |  |  |  |          |
|  |  |        |  | CLDN4  | PIM1         |         |  |  |  |          |
|  |  |        |  | PPARA  |              |         |  |  |  |          |
|  |  |        |  | PPARD  |              |         |  |  |  |          |
|  |  |        |  | HSF1   |              |         |  |  |  |          |
|  |  |        |  | CRP    |              |         |  |  |  |          |
|  |  |        |  | CXCL10 |              |         |  |  |  |          |
|  |  |        |  | CHUK   |              |         |  |  |  |          |
|  |  |        |  | SPP1   |              |         |  |  |  |          |
|  |  |        |  | RUNX2  |              |         |  |  |  |          |
|  |  |        |  | RASSF1 |              |         |  |  |  |          |
|  |  |        |  | E2F1   |              |         |  |  |  |          |
|  |  |        |  | E2F2   |              |         |  |  |  |          |

|  |  |  |  |        |  |  |  |  |  |  |
|--|--|--|--|--------|--|--|--|--|--|--|
|  |  |  |  | ACPP   |  |  |  |  |  |  |
|  |  |  |  | CTSD   |  |  |  |  |  |  |
|  |  |  |  | IGFBP3 |  |  |  |  |  |  |
|  |  |  |  | IGF2   |  |  |  |  |  |  |
|  |  |  |  | CD40LG |  |  |  |  |  |  |
|  |  |  |  | IRF1   |  |  |  |  |  |  |
|  |  |  |  | ERBB3  |  |  |  |  |  |  |
|  |  |  |  | PON1   |  |  |  |  |  |  |
|  |  |  |  | DIO1   |  |  |  |  |  |  |
|  |  |  |  | PCOLCE |  |  |  |  |  |  |
|  |  |  |  | NPEPPS |  |  |  |  |  |  |
|  |  |  |  | HK2    |  |  |  |  |  |  |
|  |  |  |  | RASA1  |  |  |  |  |  |  |
|  |  |  |  | GSTM1  |  |  |  |  |  |  |
|  |  |  |  | GSTM2  |  |  |  |  |  |  |

| Wedelolactone |        |                       |  | Butin |       |                       |  | 3'-O-Methylorobol |       |                       |
|---------------|--------|-----------------------|--|-------|-------|-----------------------|--|-------------------|-------|-----------------------|
| TCMSP         | DGldb  | SwissTargetPrediction |  | TCMSP | DGldb | SwissTargetPrediction |  | TCMSP             | DGldb | SwissTargetPrediction |
| ESR1          | CBR1   | ALOX5                 |  | PTGS1 | /     | CYP19A1               |  | NOS2              | /     | ABCB1                 |
| PPARG         | THRB   | CBR1                  |  | PTGS2 |       | CA7                   |  | PTGS1             |       | CA7                   |
| ESR2          | APEX1  | ESR1                  |  | RXRA  |       | CA12                  |  | ESR1              |       | CA12                  |
| GSK3B         | BLM    | ESR2                  |  |       |       | CA4                   |  | AR                |       | CA4                   |
| IKKBK         | CBFB   | CA12                  |  |       |       | CYP1B1                |  | PPARG             |       | CYP19A1               |
| AR            | MAPK3  | CA9                   |  |       |       | ABCC1                 |  | PTGS2             |       | HSD17B2               |
|               | NFKBIA | CA13                  |  |       |       | HSD17B1               |  | ESR2              |       | CBR1                  |
|               | MAPK1  | CA5B                  |  |       |       | SHBG                  |  | MAPK14            |       | EGFR                  |
|               | RECQL  | GSR                   |  |       |       | CBR1                  |  | GSK3B             |       | PTPRS                 |
|               | RUNX1  | AKR1B1                |  |       |       | ESR1                  |  | CHEK1             |       | TYR                   |
|               | POLK   | KCNA5                 |  |       |       | ESR2                  |  | PRSS1             |       | MIF                   |
|               |        | KCNA3                 |  |       |       | MAOB                  |  | CCNA2             |       | CA2                   |
|               |        | CA7                   |  |       |       | PTGS1                 |  | NCOA1             |       | XDH                   |
|               |        | CA1                   |  |       |       | TAS2R31               |  |                   |       | ESR1                  |

|  |  |        |  |  |  |         |  |  |  |         |
|--|--|--------|--|--|--|---------|--|--|--|---------|
|  |  | ERBB2  |  |  |  | MMP13   |  |  |  | ESR2    |
|  |  | CCND1  |  |  |  | ABCG2   |  |  |  | IL2     |
|  |  | PDGFRB |  |  |  | MMP12   |  |  |  | PPARA   |
|  |  | FLT4   |  |  |  | ADORA1  |  |  |  | ALOX12  |
|  |  | CDK2   |  |  |  | ADORA3  |  |  |  | TLR9    |
|  |  | PLK4   |  |  |  | AKR1C3  |  |  |  | HSD17B1 |
|  |  | TEK    |  |  |  | GRM5    |  |  |  | TBXAS1  |
|  |  | AURKA  |  |  |  | PLA2G1B |  |  |  | MAOA    |
|  |  | MAP3K8 |  |  |  | KLK1    |  |  |  | MGAM    |
|  |  | BRAF   |  |  |  | KLK2    |  |  |  | HTR2A   |
|  |  | EPHB4  |  |  |  | CES1    |  |  |  | HTR2C   |
|  |  | SQLE   |  |  |  | PPARG   |  |  |  | ADORA1  |
|  |  | FGR    |  |  |  | CES2    |  |  |  | ADORA2A |
|  |  | LYN    |  |  |  | KIT     |  |  |  | ESRRA   |
|  |  | MAOA   |  |  |  | SRC     |  |  |  | ESRRB   |
|  |  | KCNMA1 |  |  |  | KDR     |  |  |  | ABCG2   |
|  |  | IGF1R  |  |  |  | FGFR1   |  |  |  | ALDH2   |
|  |  | AURKB  |  |  |  | MET     |  |  |  | MAOB    |
|  |  | SRC    |  |  |  | ALOX12  |  |  |  | NOX4    |
|  |  | PTK2   |  |  |  | SLC5A2  |  |  |  | PTGS1   |
|  |  | KDR    |  |  |  | CA2     |  |  |  | SLC6A2  |
|  |  | PLK1   |  |  |  | CA1     |  |  |  | ALOX15  |
|  |  | MET    |  |  |  | POLB    |  |  |  | CA1     |
|  |  | AKT1   |  |  |  | CA3     |  |  |  | PFKFB3  |
|  |  | NUAK1  |  |  |  | CA6     |  |  |  | ABCC1   |
|  |  | FEN1   |  |  |  | CA13    |  |  |  | CYP1B1  |
|  |  | EGFR   |  |  |  | CA5B    |  |  |  | CDC7    |
|  |  | CA6    |  |  |  | CA5A    |  |  |  | ACHE    |
|  |  | CA14   |  |  |  | PLA2G2A |  |  |  | IGFBP3  |
|  |  | CA4    |  |  |  | PLA2G5  |  |  |  | MCL1    |
|  |  | CA5A   |  |  |  | PLA2G10 |  |  |  | PON1    |
|  |  | PFKFB3 |  |  |  | DYRK1A  |  |  |  | PTPN1   |

|  |  |         |  |  |  |          |  |  |  |          |
|--|--|---------|--|--|--|----------|--|--|--|----------|
|  |  | PIK3CG  |  |  |  | CA9      |  |  |  | AKR1B1   |
|  |  | PIK3CA  |  |  |  | CHRNA7   |  |  |  | SNCA     |
|  |  | DUSP3   |  |  |  | APP      |  |  |  | PLAT     |
|  |  | TERT    |  |  |  | ACHE     |  |  |  | F10      |
|  |  | CYP1A2  |  |  |  | BACE1    |  |  |  | PLAU     |
|  |  | SRD5A1  |  |  |  | MMP2     |  |  |  | IGFBP6   |
|  |  | GPR35   |  |  |  | RXRA     |  |  |  | IGFBP4   |
|  |  | HDAC3   |  |  |  | HSD17B2  |  |  |  | IGFBP5   |
|  |  | HDAC6   |  |  |  | BCL2     |  |  |  | IGFBP2   |
|  |  | HDAC2   |  |  |  | ESRRA    |  |  |  | IGFBP1   |
|  |  | HSD17B1 |  |  |  | ESRRB    |  |  |  | STS      |
|  |  | HDAC8   |  |  |  | SERPINE1 |  |  |  | DUSP3    |
|  |  | HDAC1   |  |  |  | YWHAG    |  |  |  | CDC25B   |
|  |  | PKN1    |  |  |  | NOX4     |  |  |  | HSP90AB1 |
|  |  | NEK2    |  |  |  | GSK3B    |  |  |  | PTK6     |
|  |  | NEK6    |  |  |  | HSD17B14 |  |  |  | TBXA2R   |
|  |  | HDAC10  |  |  |  | IGFBP3   |  |  |  | CA5B     |
|  |  | PRKCA   |  |  |  | CLK1     |  |  |  | BAD      |
|  |  | PRKCB   |  |  |  | DYRK1B   |  |  |  | ALOX5    |
|  |  | PRKCE   |  |  |  | DNMT1    |  |  |  | CHEK1    |
|  |  | XDH     |  |  |  | ST3GAL3  |  |  |  | WEE1     |
|  |  | AMY1A   |  |  |  | FUT7     |  |  |  | TNF      |
|  |  | CA2     |  |  |  | FUT4     |  |  |  | PLG      |
|  |  | GSK3B   |  |  |  | STAT1    |  |  |  | BACE1    |
|  |  | CSNK2A1 |  |  |  | SQLE     |  |  |  | CA3      |
|  |  | BACE1   |  |  |  | MMP9     |  |  |  | CA6      |
|  |  | DHODH   |  |  |  | MAPT     |  |  |  | CA14     |
|  |  | F2      |  |  |  | ERN1     |  |  |  | CA9      |
|  |  | FNTA    |  |  |  | IGF1R    |  |  |  | CA13     |
|  |  | PRSS1   |  |  |  | INSR     |  |  |  | CA5A     |
|  |  | F10     |  |  |  | TERT     |  |  |  | GCGR     |
|  |  | PLAU    |  |  |  | LCK      |  |  |  | CRHR1    |

|  |  |          |  |  |  |        |  |  |  |          |
|--|--|----------|--|--|--|--------|--|--|--|----------|
|  |  | NOS2     |  |  |  | SYK    |  |  |  | PRMT1    |
|  |  | NOX4     |  |  |  | NQO2   |  |  |  | PRSS1    |
|  |  | FASN     |  |  |  | MAOA   |  |  |  | IGF1R    |
|  |  | HSPA1A   |  |  |  | FFAR1  |  |  |  | CXCR2    |
|  |  | PTGS2    |  |  |  | HIF1A  |  |  |  | TNNC1    |
|  |  | SLC22A12 |  |  |  | CDK5R1 |  |  |  | CDK5R1   |
|  |  | INSR     |  |  |  | AKT1   |  |  |  | CCNB3    |
|  |  | PTPN1    |  |  |  | VCP    |  |  |  | ARG1     |
|  |  | COMT     |  |  |  | AKR1B1 |  |  |  | HSP90B1  |
|  |  | KDM4E    |  |  |  | ABCB1  |  |  |  | KLKB1    |
|  |  | CDK1     |  |  |  | CDK2   |  |  |  | CCR4     |
|  |  | APP      |  |  |  | CDC7   |  |  |  | PLA2G2A  |
|  |  | SNCA     |  |  |  | CTSB   |  |  |  | FNTA     |
|  |  | DAPK1    |  |  |  | PTPN1  |  |  |  | SORT1    |
|  |  | MPG      |  |  |  | F3     |  |  |  | EGLN1    |
|  |  | EIF4H    |  |  |  | ADCY5  |  |  |  | APP      |
|  |  | PABPC1   |  |  |  | ODC1   |  |  |  | HSP90AA1 |
|  |  | EGLN1    |  |  |  | PDPK1  |  |  |  | PARP1    |
|  |  | MAOB     |  |  |  | WEE1   |  |  |  | TNKS2    |
|  |  | MMP9     |  |  |  | EDNRA  |  |  |  | TNKS     |
|  |  | MMP2     |  |  |  | PARP1  |  |  |  | CDK6     |
|  |  | IGFBP3   |  |  |  | SNCA   |  |  |  | CHEK2    |
