# Supplementary material for: Pharmacological Mechanisms Underlying the Hepatoprotective Effects of Ecliptae herba on Hepatocellular Carcinoma
Source: Evid Based Complement Alternat Med. 2021 Jul 16;2021:5591402. doi: 10.1155/2021/5591402 (PMC8302389; doi:10.1155/2021/5591402)
Supplement: Supplementary Materials — Supplementary File S1: a total of 48 chemical ingredients of EH were obtained from TCMSP. Supplementary File S2: detailed information of the targets of 6 active ingredients in EH was extracted from three databases, TCMSP, DGIDB, and SwissTargetPrediction. Supplementary File S3: detailed information on HCC-related targets was extracted from GeneCards and CTD. Supplementary File S4: detailed information on the PPI network of 52 potential therapeutic targets for HCC was obtained from the STRING platform. Supplementary File S5: topological parameters of nodes in the E-H network obtained from Cytoscape. Supplementary File S6: detailed information on GO enrichment analysis obtained from WebGestalt. Supplementary File S7: detailed information on the top 10 GO terms of the GO network in the TCGA RNASeq LIHC database through Network Topology-based Analysis obtained from WebGestalt. Supplementary File S8: detailed information on the top 20 KEGG enrichment pathways obtained from the WebGestalt. Supplementary File S9: detailed information on the C-T-P network obtained from Cytoscape. [file 5591402.f1.zip › 5591402.f1/Supplementary File S3.pdf]

## Hepatocellular carcinoma

### GeneCards

### CTD

|        |        |
|--------|--------|
| TP53   | CCND1  |
| MET    | CASP8  |
| CTNNB1 | NFE2L2 |
| PIK3CA | JUN    |
| APC    | PARP1  |
| CDKN2A | MYC    |
| EGFR   | TNF    |
| HRAS   | CCNB1  |
| PTEN   | MKI67  |
| AKT1   | CYP1A1 |
| KRAS   | CYP1A2 |
| CDH1   | IL6    |
| ERBB2  | PCK1   |
| CCND1  | TGFB1  |
| TERT   | MMP2   |
| BRAF   | EGR1   |
| TGFBR2 | EGFR   |
| MSH2   | GSTM1  |
| CDKN1A | CTNNB1 |
| SMAD4  | HSPB1  |
| NRAS   | SOD2   |
| EPCAM  | PTGS2  |
| MTOR   | CDK1   |
| BRCA1  | VCAM1  |
| CASP8  | RB1    |
| NFE2L2 | IGF1   |
| HNF1A  | EPHX1  |
| FAS    | FOS    |
| CDKN1B | TOP2A  |
| AXIN1  | TRP53  |
| H19    | CCNE1  |
| RB1    | EGF    |
| MLH1   | SREBF1 |
| BAX    | AFP    |
| FASLG  | CDKN1B |
| EGF    | CXCL12 |
| FHIT   | CDK4   |
| KIT    | PTEN   |
| RET    | CYP2E1 |
| FGFR1  | GDF15  |
| ESR1   | ESR1   |
| MIR21  | CEBPB  |
| CDKN3  | HSPA5  |
| MDM2   | MMP9   |
| STK11  | CEBPA  |
| IGF2   | RRM2   |
| PTCH1  | SLC2A2 |
| VEGFA  | GSTP1  |
| MMP1   | ACACA  |
| IGF2R  | FASN   |
| RAF1   | CDC20  |
| MSH6   | HMGCR  |
| STAT1  | STAT1  |
| MIR145 | CCNB2  |
| MIR17  | MAD2L1 |

|           |        |
|-----------|--------|
| IDH1      | E2F1   |
| MIR31     | PK4    |
| BRCA2     | DCN    |
| GNAS      | IGF1R  |
| MYC       | SLC2A1 |
| MIR221    | AURKA  |
| MIR34A    | CTSD   |
| PPARG     | HGF    |
| CDKN2B    | IRS1   |
| MIR143    | MET    |
| SRC       | HRAS   |
| FGFR2     | MPO    |
| TNFRSF10B | BTG2   |
| MIR200A   | CBR1   |
| MIR195    | RPS6   |
| MIR155    | UBE2C  |
| TGFB1     | NR1H4  |
| FGFR4     | ACOX1  |
| HIF1A     | BID    |
| MIR141    | ME1    |
| STAT3     | IGF2   |
| KRT7      | MCM2   |
| SMARCB1   | CCN1   |
| MAP2K1    | HMGB2  |
| HNF4A     | NUSAP1 |
| MIR126    | CDKN3  |
| AR        | ISG15  |
| TP73      | UBD    |
| MIR27A    | ABCB4  |
| MIR214    | GHR    |
| SMARCA4   | TLR4   |
| MIR146A   | PKM    |
| IDH2      | CCL3   |
| MIR200C   | NR0B2  |
| AFP       | ABCB1  |
| AURKA     | ANXA4  |
| IL1B      | HSPA9  |
| MIR125A   | MTOR   |
| TWIST1    | SCD    |
| MTUS1     | KRAS   |
| JAG1      | PDIA3  |
| HFE       | PTTG1  |
| PTGS2     | CDC25C |
| KEAP1     | RRM1   |
| KRT19     | APOA1  |
| TERC      | DPYD   |
| BIRC5     | MT1A   |
| MIR29C    | CDKN2A |
| MIR150    | CEBPD  |
| MIR200B   | TYMS   |
| CHEK2     | ACTB   |
| MIR205    | CP     |
| MIR204    | RARA   |
| TGFB1     | ENO1   |
| OGG1      | GJB1   |
| MIR122    | TGFA   |
| MIR193A   | CENPE  |
| MIR140    | GLUL   |

|           |         |
|-----------|---------|
| MIR22     | KIF2C   |
| MIR106B   | PLK1    |
| MMP9      | CENPF   |
| MIR182    | CDC6    |
| MIR483    | USP2    |
| MIR148A   | PHLDA1  |
| CD44      | F2      |
| MIR222    | IL1RN   |
| MIR203A   | UHRF1   |
| MIR185    | SOCS3   |
| MIR224    | LIFR    |
| MIR30E    | PTK2    |
| IL6       | CYP17A1 |
| BCL2      | STMN1   |
| ATM       | PRDX2   |
| MIRLET7A1 | TK1     |
| CASP3     | CENPA   |
| MIR10B    | KIF20A  |
| MUC1      | DLGAP5  |
| MIR93     | PGD     |
| MIR15A    | ACLY    |
| AXIN2     | PBK     |
| PMS2      | IGFALS  |
| PTPN11    | PZP     |
| SERPINA1  | AKR1B10 |
| KCNQ1OT1  | PRDX1   |
| MIR183    | BUB1    |
| MMP2      | LCAT    |
| MIR223    | FABP5   |
| NFKBIA    | MAT1A   |
| SPRTN     | NEK2    |
| TSC2      | APEX1   |
| MIR18A    | SFN     |
| MIR23A    | MT2A    |
| KLF6      | APCS    |
| MIR181A1  | A2M     |
| MIR192    | CRP     |
| MIR486-1  | RAC1    |
| MIR23B    | PRC1    |
| MIR29A    | SOCS2   |
| MAPK1     | GAPDH   |
| TSC1      | EZH2    |
| MIR26A1   | FST     |
| MIR191    | NME1    |
| IFNG      | RCAN1   |
| GSTP1     | FDFT1   |
| MIR20A    | MAPT    |
| FAH       | CXCL14  |
| MIR15B    | AURKB   |
| JUN       | CDCA8   |
| BCL2L1    | ATG7    |
| MIR96     | ECM1    |
| HGF       | ADH4    |
| TCF4      | SLC22A1 |
| HNF1B     | TPX2    |
| CXCL8     | ZWINT   |
| MIR127    | SPC25   |
| CD274     | EGR2    |

|          |         |
|----------|---------|
| KDR      | TTK     |
| MIRLET7G | IRS2    |
| MIRLET7D | INMT    |
| MIR34C   | GMNN    |
| MKI67    | ATM     |
| TNF      | NCAPH   |
| MIR19A   | MCM10   |
| NOTCH1   | RACGAP1 |
| MIR107   | TRIM24  |
| ABCB4    | ACO2    |
| PDGFRL   | GNMT    |
| CDKN1C   | TERT    |
| MIR25    | BUB1B   |
| TGFA     | GLI1    |
| RASSF1   | SKP2    |
| MIR16-1  | FOXM1   |
| NR1H4    | CDCA5   |
| CASP9    | CCNF    |
| MIR199B  | HAO2    |
| CEACAM5  | NDC80   |
| G6PC     | CHAF1B  |
| KRT18    | IL1RAP  |
| KRT8     | CDCA3   |
| CDK4     | AADAT   |
| MIRLET7B | MYBL2   |
| GPC3     | CDKN2C  |
| MAPK3    | APC     |
| MIR324   | NUF2    |
| CREBBP   | ERP29   |
| IGF1R    | THY1    |
| SDHB     | ESM1    |
| MEN1     | FBP1    |
| GSTM1    | PRDX6   |
| MUTYH    | ECT2    |
| MIRLET7E | IDH1    |
| MAPK8    | TRIP13  |
| DLC1     | ETFA    |
| NME1     | TH      |
| PEG10    | ASF1B   |
| FGF2     | CD34    |
| MIRLET7C | TAGLN2  |
| EP300    | NNMT    |
| MIR128-2 | FOSB    |
| ABCB1    | DTL     |
| NFKB1    | HMMR    |
| ITGB4    | KIF23   |
| TNFSF10  | UCHL1   |
| VHL      | PYGL    |
| MIR130A  | MVK     |
| VIM      | E2F8    |
| MIR137   | CD163   |
| MIR24-2  | CEP55   |
| IL2      | ANLN    |
| HULC     | NCAPG   |
| MIR196A2 | PDGFB   |
| VEGFC    | ASPM    |
| ALB      | CDH13   |
| ERBB3    | ACSL4   |

|           |           |
|-----------|-----------|
| SPP1      | TFPI2     |
| CYP1A1    | MECP2     |
| SLC2A1    | PIK3CA    |
| EZH2      | CD5L      |
| MIR181B1  | CYP2B6    |
| MIRLET7A3 | EHD3      |
| IL12RB1   | NAT2      |
| TYMP      | MELK      |
| IFNA1     | TCF19     |
| INS       | RND3      |
| FGFR3     | PLAC8     |
| CXCR4     | COMT      |
| JAK2      | C9        |
| RARB      | CDC45     |
| FLT1      | KIF11     |
| BMPR1A    | CA2       |
| YAP1      | CYP39A1   |
| BMP2      | ADAMTS1   |
| TLR2      | TALDO1    |
| MIR181A2  | PHB       |
| ABCB11    | HAMP      |
| MIR152    | LRAT      |
| RAC1      | CCNA1     |
| PTK2      | GTSE1     |
| SYP       | KMT2A     |
| MAGEA3    | UBE2T     |
| WRAP53    | OLFML2B   |
| HTATIP2   | STAT4     |
| MAGEA1    | RPS6KA3   |
| PRKACA    | CDCA2     |
| IL10      | CFP       |
| SMAD2     | COL15A1   |
| TIMP2     | SERPINA1  |
| MMP7      | IRF2      |
| MLH3      | PGK1      |
| PLAU      | AKR1C2    |
| CCNA2     | ITIH3     |
| HOTAIR    | SFRP1     |
| RHOA      | PCLAF     |
| SMAD3     | KIF15     |
| MALAT1    | KIF14     |
| PARP1     | CCR1      |
| MIR199A1  | TACC3     |
| DNMT1     | TST       |
| CYCS      | ROBO1     |
| MIR215    | MLXIPL    |
| NF1       | FANCI     |
| PALB2     | IQGAP1    |
| CDH2      | ZFP36     |
| CDK2      | HHIP      |
| CTTN      | IGF2R     |
| IFNL3     | ARHGAP11A |
| PTPRC     | BMPER     |
| MAPK14    | SREBF2    |
| NKX2-1    | VASN      |
| MIR181C   | PDGFRL    |
| CAV1      | KIFC1     |
| CCNB1     | CSPG4     |

|          |          |
|----------|----------|
| HEPN1    | UMPS     |
| CDK6     | CENPU    |
| CXCL12   | SRPX     |
| SNAI1    | GPC3     |
| NBN      | BRAF     |
| IGF1     | YAP1     |
| SERPINB3 | KIF4A    |
| PLAUR    | NR1H2    |
| HSPB1    | HGFAC    |
| PMS1     | SHH      |
| E2F1     | SLC25A47 |
| ITGB1    | MED1     |
| CHGA     | PTH1R    |
| MGMT     | GYS2     |
| XRCC3    | YTHDF2   |
| MMP14    | FANCD2   |
| MME      | RAD54L   |
| BSG      | BCO2     |
| TIMP1    | CELSR3   |
| NQO1     | SLIT2    |
| ABCC1    | IQGAP3   |
| TYR      | LYVE1    |
| XIAP     | UBE2E2   |
| PRKAR1A  | MFSD2A   |
| PDGFRA   | CYLD     |
| MCL1     | ARID1B   |
| HSP90AA1 | PAMR1    |
| SERPINA3 | PYCARD   |
| IFI27    | KMT2C    |
| RXRA     | CDT1     |
| CFLAR    | IQGAP2   |
| MIR30A   | INPP4B   |
| NOS2     | TROAP    |
| WRN      | TSC1     |
| PIK3R1   | TCIM     |
| DNMT3B   | HSD3B2   |
| ARID1A   | DEPDC1B  |
| ANXA5    | CENPM    |
| CDK1     | KCNN2    |
| TIMP3    | APLN     |
| XRCC1    | SKA1     |
| JAK1     | TLR9     |
| MEG3     | TSLP     |
| UCA1     | IGF2BP3  |
| SNAI2    | ASPG     |
| MIR139   | KBTBD11  |
| PDGFRB   | APOF     |
| IFNA2    | NOTCH3   |
| MAGEC2   | EXO1     |
| GSK3B    | KIF18A   |
| MSH3     | CSRNP1   |
| ABCG2    | CDK14    |
| AREG     | CENPW    |
| STARD13  | ORC1     |
| PROM1    | PLVAP    |
| PVT1     | ARID2    |
| SP1      | ADD1     |
| ZEB1     | EAF2     |

|            |         |
|------------|---------|
| CALCA      | LRRC59  |
| PIK3CG     | PKMYT1  |
| TNFRSF10A  | PPP1R1A |
| BAK1       | MBTPS1  |
| GRB2       | CYP2C8  |
| HPSE       | MARCO   |
| PRKCA      | FGF19   |
| AKT2       | GIN51   |
| TUG1       | TRAIP   |
| PCNA       | ANGPTL6 |
| F2         | RTP3    |
| SDHD       | FGF4    |
| LRRC56     | GPM6A   |
| MIR181B2   | CKAP2L  |
| LEF1       | MT1E    |
| ANXA2      | UROC1   |
| GGT1       | FAM83D  |
| GAPDH      | SCAP    |
| IL6R       | DEPDC1  |
| GAS5       | AXIN1   |
| PRKCD      | CPEB3   |
| SDHC       | NEIL3   |
| CTAG1B     | RUNX3   |
| PKM        | CD274   |
| URGCP      | OLFML2A |
| AHCY       | TMEM70  |
| E2F2       | MIR122  |
| MIR149     | COLEC10 |
| H2AC18     | PKP1    |
| SPARC      | STAB2   |
| CCNE1      | GNAO1   |
| POU5F1     | COPS5   |
| MIR9-1     | PNPT1   |
| FGL1       | KMT2B   |
| BAD        | HERC5   |
| CCR6       | CYP4A11 |
| SKP2       | TLR7    |
| ENG        | HJURP   |
| CDKN2B-AS1 | JDP2    |
| EPO        | VIPR1   |
| BIRC3      | WDR62   |
| CASP10     | PITX1   |
| SOD2       | GPR182  |
| RPS6KB1    | CAP2    |
| KRT5       | PARK7   |
| WNT5A      | MBTPS2  |
| MIR142     | CNDP1   |
| CASP7      | RSPO3   |
| TCF7L2     | EPS8L3  |
| CCAT1      | HOXA10  |
| MIR144     | VSIG4   |
| NEAT1      | IGF2BP1 |
| SIRT1      | ZIC2    |
| CYP2E1     | MRO     |
| CTLA4      | ARID1A  |
| MIR101-1   | KDM8    |
| ABCC2      | CEP131  |
| GPT        | MICA    |

|           |           |
|-----------|-----------|
| TJP2      | CCBE1     |
| AKT3      | DNAJC6    |
| MIR451A   | WDR76     |
| SOS1      | GDF2      |
| PIK3CB    | MT1F      |
| WNT1      | SLC26A6   |
| BMP6      | EIF3H     |
| SHC1      | OIT3      |
| SETD2     | TTC36     |
| SPRY4-IT1 | ARHGEF39  |
| SFRP1     | CLEC4G    |
| FOS       | FAM111B   |
| AKR1B10   | LRRC1     |
| MIR24-1   | HOTAIR    |
| EPAS1     | DNASE1L3  |
| FOXM1     | MOGAT2    |
| LINC-ROR  | ATP5PD    |
| E2F3      | CETP      |
| TLR4      | CLEC1B    |
| DPYD      | ADRA1A    |
| CYP17A1   | FBXL18    |
| RUNX3     | ADRA2B    |
| PDCD1     | SKA3      |
| ZFAS1     | TIMD4     |
| ERCC6     | HOXD9     |
| UROD      | MTBP      |
| ZEB2      | RNF157    |
| ICAM1     | KIF18B    |
| CD82      | FATE1     |
| ZC4H2     | CRHBP     |
| HEIH      | MSH5      |
| EZR       | FLVCR1    |
| CASC2     | HOXA13    |
| MSR1      | DIRAS3    |
| CLTC      | GBA3      |
| MIR196A1  | ADAMTS13  |
| EGR1      | DEPDC5    |
| CDX2      | GNAZ      |
| ANGPT2    | ZNF23     |
| POLE      | CNTNAP4   |
| TGFB2     | TONSL     |
| ALDH2     | IGBP1     |
| MIR99A    | TGM3      |
| XIST      | PITPNM3   |
| PHF20     | PLXDC1    |
| NTRK1     | ZIC5      |
| SMARCA2   | MAGEA1    |
| CD34      | CLEC4M    |
| CYTOR     | DBH       |
| HSPA5     | CLTRN     |
| CCAT2     | MAGEA3    |
| MIR424    | GPR158    |
| MIR338    | SPRTN     |
| PCAT1     | SLC22A10  |
| ETS1      | GABRD     |
| FASN      | C14ORF180 |
| BECN1     | FGF3      |
| TGFB3     | NLRC3     |

|          |           |
|----------|-----------|
| CCL2     | ZIC4      |
| RNASEL   | MAGEA6    |
| DNAJB1   | XAGE1B    |
| SQSTM1   | CSMD1     |
| KRT14    | ADGRG7    |
| UCHL1    | COX7B2    |
| MIR423   | LPA       |
| HOTTIP   | TEDC2     |
| SOCS1    | TICRR     |
| MAGEA4   | LILRB5    |
| PIK3R3   | FAM180A   |
| MTA1     | CCL14     |
| CHP2     | FCN2      |
| MIR490   | SSX1      |
| MIR429   | FAM72B    |
| HSPA4    | FCN3      |
| HDAC1    | MAGEC2    |
| SMAD7    | MIR615    |
| PIK3R2   | DIPK2B    |
| PTK2B    | FAM65C    |
| FOXP3    | TATDN1    |
| NANOG    | DCAF4L2   |
| ENPP2    | MIR520B   |
| PXN      | PPP4R3C   |
| FGF3     | FAM134B   |
| SF3B2    | RBMV      |
| MVP      | INS-IGF2  |
| WNT3A    | LINC00221 |
| CCN2     | NKILA     |
| MIR138-1 | SPRTN     |
| CD80     | TP53      |
| IFNB1    | BCL2L1    |
| DKK1     | BIRC5     |
| HMOX1    | PPARG     |
| ATP7B    | TNFSF10   |
| BARD1    | NFKBIA    |
| HAMP     | AR        |
| ENO1     | CXCL8     |
| IRS1     | HTATIP2   |
| MIR133B  | SERPINA4  |
| ACTB     | ACE       |
| WNT3     | IFNA1     |
| SOX2     | SLC5A5    |
| FZD7     | CD276     |
| TP63     | THEM4     |
| SULF1    | LETM1     |
| STMN1    | MIR885    |
| GREM1    | MIR539    |
| PLCG1    | CDKN1A    |
| PTPRH    | PCNA      |
| HEPACAM  | BAX       |
| POLH     | CASP3     |
| IKBKB    | NFKB1     |
| DANCR    | BCL2      |
| ARID2    | FAS       |
| MIR124-1 | ABCC3     |
| PANDAR   | MDM2      |
| MIR29B1  | RELA      |

|           |         |
|-----------|---------|
| KRT20     | CASP9   |
| MIR30D    | IL1B    |
| HMBS      | CAT     |
| PNPLA3    | H2AX    |
| MIR296    | CDH1    |
| CRNDE     | ALDH1A1 |
| GAST      | NQO1    |
| RSF1      | CD14    |
| ABCC3     | ABCC2   |
| MIR197    | GADD45A |
| SSTR2     | COL1A1  |
| EPHX1     | GPX1    |
| RRM2      | KRT8    |
| MRE11     | GSR     |
| TPX2      | DNMT1   |
| MIR212    | IFNG    |
| LARP1     | CD36    |
| IGF2BP2   | MAPK1   |
| UBD       | GSTA2   |
| MIR375    | VIM     |
| PRKCB     | GPT     |
| PAX8      | CCNG1   |
| RECK      | GSK3B   |
| HK2       | GSTM3   |
| PGR       | COL1A2  |
| GLUL      | VEGFA   |
| PTHLH     | DDIT3   |
| SLC22A18  | TIMP1   |
| PBRM1     | ATF3    |
| DIABLO    | TRIB3   |
| CEACAM1   | PPARA   |
| ERCC2     | SCD1    |
| GHET1     | ACTA2   |
| PODXL     | AKT1    |
| IGFBP3    | CDK2    |
| SNHG1     | SOD1    |
| TFE3      | POR     |
| LINC00261 | NR3C1   |
| MIR455    | ABCG2   |
| SOCS3     | STAT3   |
| WNT2      | MAPK8   |
| AFAP1-AS1 | CASP7   |
| MIR125B1  | MGMT    |
| RAD51C    | HMOX1   |
| CXCR1     | GCLC    |
| HNF1A-AS1 | CCNA2   |
| HMGA2     | MAPK3   |
| PTENP1    | GADD45B |
| SST       | IGFBP3  |
| AURKB     | ICAM1   |
| GJB1      | SPP1    |
| MDK       | CCN2    |
| RHOC      | APAF1   |
| CNDP2     | IGFBP1  |
| SLC25A13  | IL10    |
| CYP1A2    | CYCS    |
| TNFRSF6B  | CDH2    |
| GOLM1     | UGT1A1  |

|            |           |
|------------|-----------|
| EPHA2      | ODC1      |
| LRP6       | SRXN1     |
| GSTM3      | ID1       |
| SERPINE1   | EHHADH    |
| MIR132     | NOS2      |
| IFNAR2     | FASLG     |
| FBXW7      | TFRC      |
| MIR133A1   | GJA1      |
| PIGR       | GSTA4     |
| PRDM2      | NPM1      |
| RBM39      | AHR       |
| ARG1       | XIAP      |
| ATP8B1     | SERPINE1  |
| NDUFA13    | TGFBR2    |
| MIR26B     | FN1       |
| VPS37A     | SLC3A2    |
| SET        | TNFRSF10B |
| URI1       | BIRC3     |
| ITGA5      | GSTM2     |
| SEMA4A     | MAPK14    |
| MIR590     | ASS1      |
| CPQ        | S100A9    |
| NOTCH4     | NR1I2     |
| CDC25A     | LPL       |
| ANGPT1     | FABP4     |
| CASC15     | ABCC4     |
| NUS1       | APP       |
| SOX2-OT    | CCND2     |
| PSMD10     | CXCL1     |
| MIR301A    | PPARGC1A  |
| BANCR      | PIM1      |
| HSP90B1    | BAD       |
| CRP        | ABCA1     |
| MIR503     | SGK1      |
| MIR33A     | GPAM      |
| MIR491     | CXCL10    |
| GAB1       | ALAS1     |
| TG         | RAD51     |
| IL4        | HSP90AB1  |
| MIR148B    | SQLE      |
| SLC37A4    | SPARC     |
| GADD45B    | CXCR4     |
| DDIT3      | VLDLR     |
| TCF7       | IER3      |
| DNMT3A     | IL4       |
| WNT7A      | HIF1A     |
| ZEB2-AS1   | CYP3A11   |
| RAD51D     | GPX2      |
| SDHA       | CYP2B10   |
| DYNLRB1    | HSPE1     |
| LIN28B     | IL1A      |
| GADD45G    | CTSB      |
| MTHFR      | CCL2      |
| LNCRNA-ATB | ANGPTL4   |
| PIK3CD     | GSTA1     |
| NPTN-IT1   | CFLAR     |
| FRZB       | ABCC1     |
| CREB3L3    | ECH1      |

|           |          |
|-----------|----------|
| HOXA11-AS | TSC22D1  |
| COPS5     | ABCB1A   |
| ALK       | CYP7A1   |
| FN1       | FGF2     |
| MIR186    | TPM1     |
| ELK1      | EPCAM    |
| ESR2      | TGFB1    |
| POLD1     | CPT1B    |
| CBR3-AS1  | G0S2     |
| ERCC1     | DDIT4    |
| BATF2     | CYP4A14  |
| RBP5      | CCNG2    |
| ZNRD1ASP  | GSTT1    |
| MIR129-1  | HPRT1    |
| SREBF1    | HSPD1    |
| ACTG1     | ID2      |
| MST1R     | PDGFRB   |
| FZD2      | S100A8   |
| MAD2L1    | CALR     |
| YY1AP1    | MAPK9    |
| NAA40     | ENC1     |
| GRAMD1A   | XDH      |
| NORAD     | SQSTM1   |
| MIR130B   | ALB      |
| CYP19A1   | DUSP1    |
| PINX1     | SDC2     |
| LOX       | SMAD3    |
| TLR3      | ACOT1    |
| TCP10L    | CCND3    |
| CCKBR     | CTH      |
| NOTUM     | MMP3     |
| MIR363    | CAV1     |
| HDGF      | LEP      |
| SMYD3     | ANXA5    |
| WNT4      | SRC      |
| ITGAV     | NUPR1    |
| TP53COR1  | SULT1A1  |
| CTNNA1    | INSIG1   |
| SLCO1B3   | DNMT3A   |
| SNHG15    | DECR1    |
| MIR218-1  | BDNF     |
| CLDN10    | IGFBP2   |
| STEAP3    | KRT18    |
| NPM1      | LGALS3   |
| TUSC7     | PTCH1    |
| DEPDC5    | EIF4EBP1 |
| WNT7B     | IHH      |
| NOD2      | PLIN2    |
| CYP3A4    | BAK1     |
| B2M       | C1S      |
| RCHY1     | ASNS     |
| FLT4      | GAS6     |
| LGALS1    | ANXA3    |
| WNT11     | CTSL     |
| FTX       | MAP2K1   |
| ZDHHC2    | SP1      |
| DVL3      | MT1      |
| CSNK1A1   | ACSL1    |

|          |             |
|----------|-------------|
| GPX3     | CFB         |
| CCL5     | CYP7B1      |
| CA9      | LUM         |
| HMGB1    | FOSL1       |
| EGFR-AS1 | THBD        |
| HLA-A    | HMGCS1      |
| RNF43    | MAT2A       |
| DVL1     | OAT         |
| MGAT5    | NAT8        |
| SLC4A2   | DLC1        |
| WNT5B    | PKLR        |
| ING1     | PTGS1       |
| ASS1     | FKBP5       |
| BAP1     | HES1        |
| BRD7     | FADS2       |
| NTHL1    | MFGE8       |
| SNHG12   | GADD45G     |
| FABP1    | KDR         |
| GSTA1    | ACADL       |
| DACT1    | LDHA        |
| TFR2     | HSPH1       |
| MIR219A1 | NR1H3       |
| ARID1B   | PLK2        |
| TXNRD1   | TIMP2       |
| PLAG1    | KRT19       |
| TIFA     | PRKCB       |
| PLPP5    | CXCL2       |
| PCAT29   | IGFBP5      |
| GSTO2    | ACADM       |
| MIR374A  | CDKN1C      |
| DGCR5    | ALPL        |
| KLRK1    | NRP1        |
| MIR485   | PDK1        |
| DVL2     | EFNA1       |
| SARNP    | COL3A1      |
| SNHG20   | CYP3A23-3A1 |
| NTS      | MMP7        |
| RIOX2    | CYP4A10     |
| MIR675   | MSH2        |
| CDR1-AS  | S100A4      |
| GNMT     | NRG1        |
| MAP2K2   | FSTL1       |
| MIR30C1  | ABCG5       |
| MIR151A  | ENPP2       |
| GLS2     | RXRA        |
| CDH17    | GSTA3       |
| LAPTM4B  | SLCO1A1     |
| KDM4C    | ANXA2       |
| MIR92A1  | NDRG1       |
| RAD51    | CPT1A       |
| MYCT1    | UGT1A6      |
| NKILA    | PLSCR1      |
| CCEPR    | CCL5        |
| ECI2     | ID3         |
| ZEB1-AS1 | GOT1        |
| RASGRP1  | WEE1        |
| CYP1B1   | CHEK1       |
| VDR      | EDN1        |

|           |          |
|-----------|----------|
| GSTO1     | RARRES1  |
| ANGPTL8   | BHLHE40  |
| IL17A     | MCM7     |
| SMO       | IRF7     |
| MIR125B2  | MAP2K6   |
| EHD4      | GCLM     |
| WWOX      | SAT1     |
| HJV       | ABCC5    |
| HAGLR     | LY6E     |
| MIR210    | BCL6     |
| DRAIC     | SESN2    |
| HOXA-AS2  | HSPA1A   |
| MECOM     | BRCA1    |
| INSR      | IL18     |
| HINT2     | XRCC5    |
| IGF2-AS   | RBP1     |
| DYNLRB2   | XRCC1    |
| OTUD7A    | MAP1LC3B |
| CD81      | ITGB1    |
| GSTM2     | TNFRSF21 |
| MIR216A   | SERPINE2 |
| WT1-AS    | ADD3     |
| SRA1      | CKB      |
| MT-CO1    | PSAT1    |
| MIR500A   | RGS16    |
| TP73-AS1  | DNMT3B   |
| CCL20     | SELENOP  |
| AZIN1     | SLCO2A1  |
| MAT1A     | CYP1B1   |
| PIM2      | SMAD2    |
| RAB11FIP4 | GGT1     |
| IL36A     | ADM      |
| SAMD9L    | NAP1L1   |
| TTC36     | AK4      |
| FER1L4    | SULF2    |
| RAD50     | IL2      |
| LINC00473 | GSN      |
| SLC25A47  | CYBA     |
| SAPCD2    | PHGDH    |
| PCBP2-OT1 | ALAD     |
| PTPN3     | PAPSS2   |
| CLDN7     | ATP2A2   |
| FBP1      | CASP4    |
| MGST1     | RGS2     |
| ARHGEF39  | CDKN2B   |
| DNAJA3    | IGFBP4   |
| GSTA4     | DUSP6    |
| ALDOB     | GPX3     |
| ENO2      | JAK1     |
| GLYAT     | MCL1     |
| HOXA13    | UGDH     |
| HDAC9     | CD44     |
| CASC11    | BMP2     |
| XRCC2     | NEDD9    |
| PSD3      | PMP22    |
| SLC40A1   | NCL      |
| TFDP3     | KIT      |
| NR0B2     | ATF5     |

|           |          |
|-----------|----------|
| TFDP1     | ARG1     |
| MIRLET7A2 | HSP90B1  |
| LEP       | ALDOA    |
| PDX1      | CITED2   |
| ASPH      | LPIN1    |
| CPE       | S100A6   |
| MIR22HG   | PPP2CA   |
| SNHG6     | CASP12   |
| TMEM176A  | CAR3     |
| CERNA2    | DUSP10   |
| DICER1    | SLC40A1  |
| NNT-AS1   | PROM1    |
| F5        | RUNX2    |
| ACTL6A    | FABP1    |
| TYMS      | THBS1    |
| UGT1A7    | GRB10    |
| IL12A     | MCM6     |
| LECT2     | ACOT2    |
| PRAP1     | HSPA2    |
| FRAT1     | PECAM1   |
| GDF15     | PTP4A1   |
| CFAP52    | APOE     |
| CPOX      | ABCB1B   |
| CAT       | CSF2     |
| ACSL4     | GSS      |
| HBB       | IKBKB    |
| ATF6      | BHMT     |
| NUTM1     | LY6D     |
| CHUK      | CLU      |
| TGS1      | AREG     |
| MIR9-2    | EEF1A1   |
| C9orf78   | TGFB3    |
| EIF2D     | ITGAV    |
| CPS1-IT1  | PAICS    |
| ALDH3A1   | CASP6    |
| IRF5      | RHOB     |
| FALEC     | TF       |
| PDE11A    | TNFRSF1A |
| NTRK3     | NFIL3    |
| GAS5-AS1  | MCM4     |
| MYB       | TJP1     |
| PRAL      | MAP2K2   |
| RASA1     | AQP7     |
| MIR136    | KRT23    |
| CD8A      | TYROBP   |
| BCL2L11   | GSTM5    |
| CLDN1     | ANXA1    |
| CREB1     | RAF1     |
| ARAF      | CYP26A1  |
| BHMT      | PPP1R15A |
| PRKAA1    | HSPA8    |
| FAN1      | ZFP36L1  |
| MIR103A2  | HSD17B4  |
| PRECSIT   | HSPB8    |
| CD4       | SLCO2B1  |
| SNHG3     | PLTP     |
| RPS20     | UBC      |
| FABP4     | XBP1     |

|            |          |
|------------|----------|
| MIR124-2   | LITAF    |
| GSTT1      | LHB      |
| LINC00210  | PHLDA2   |
| C20orf204  | CYP3A4   |
| FOXO1      | PRKCA    |
| LINC01138  | TAGLN    |
| SF3B1      | GULO     |
| MIR26A2    | HSDL2    |
| CD68       | F3       |
| ADIPOQ     | TXNRD1   |
| IL2RA      | LEPR     |
| NOTCH3     | IL1R1    |
| CXCR3      | PLAT     |
| SRGAP1     | HSPA4L   |
| MIR1-2     | IFITM1   |
| MIR106A    | COL6A3   |
| DDR2       | PTGES    |
| LAMC2      | CD9      |
| ATP7A      | INHBA    |
| FGF19      | PNRC1    |
| MIR10A     | ATP8B1   |
| MIR100     | CDC34    |
| MIR532     | NOX4     |
| CHKA       | RARB     |
| MT-CYB     | NT5E     |
| ZNF350-AS1 | RPS6KB1  |
| MST1       | CAPN2    |
| NOTCH2     | TXNIP    |
| ARMC5      | AGT      |
| AOC4P      | CYP2B1   |
| DDB2       | FAT1     |
| MITF       | FMO5     |
| MIRLET7F2  | GBP2     |
| LGALS3     | SDHA     |
| C14orf132  | STAT5B   |
| EPHB2      | GDF10    |
| ODC1       | HMGCS2   |
| DGUOK      | MGLL     |
| HLA-DRB1   | MMP1     |
| ALDOA      | ACO1     |
| BCAS3      | PRLR     |
| KLK3       | SLC22A5  |
| MIR346     | STAR     |
| CHEK1      | NOS3     |
| RELA       | PRMT1    |
| CTCF       | INS1     |
| TF         | ERBB2    |
| PCNA-AS1   | PGR      |
| MIR335     | SLC9A3R1 |
| ICOSLG     | CYP3A13  |
| DBH-AS1    | GCK      |
| NR1H2      | GSTO1    |
| MAP3K20    | SOX9     |
| COX5A      | GPNMB    |
| PRC1-AS1   | PON2     |
| CEACAM3    | POSTN    |
| GIHCG      | RAD51AP1 |
| GZMB       | HSP90AA1 |

|                 |           |
|-----------------|-----------|
| LINC02055       | SLC7A11   |
| CARD8-AS1       | LDHB      |
| WT1             | BBC3      |
| SOX9            | PDLIM1    |
| CDH4            | IL12B     |
| LINC00974       | LXN       |
| BMI1            | MSMO1     |
| ENSG00000278769 | PPARD     |
| MIR7-3HG        | SMC2      |
| FOXE1           | APOA4     |
| HSPA6           | F2R       |
| CIB1            | PLAU      |
| EPOR            | DIO2      |
| TFRC            | MT2       |
| HLA-B           | OGG1      |
| AXL             | SELE      |
| PTPRG           | PMAIP1    |
| ENSG00000250899 | S100A11   |
| ERCC5           | BMF       |
| IRF1            | EIF5      |
| MIR518D         | PPP1R3C   |
| JPX             | NR1I3     |
| NR2F1-AS1       | NTRK2     |
| LINC01018       | EIF2S1    |
| ACTA2-AS1       | IFIT1     |
| ZNF674-AS1      | CD68      |
| LINC00665       | COL4A1    |
| PDIA3P1         | ESR2      |
| GPC3-AS1        | FHL2      |
| EGILA           | ENTPD5    |
| LDC1P           | MGST3     |
| DLEC1           | MAFF      |
| STEAP4          | BIRC2     |
| LINC00941       | THRSP     |
| GLI1            | SPON2     |
| CYLD            | C3        |
| PRL             | TMSB10    |
| HMGCR           | MME       |
| LZTS1           | CLDN1     |
| RAB4B-EGLN2     | CREBBP    |
| MT-CO2          | MBP       |
| ALPP            | ACAT1     |
| MIR30B          | JUNB      |
| LOXL2           | EGLN3     |
| SDHAF2          | DSC2      |
| SLC7A6          | BDH1      |
| MMP3            | RTN4      |
| FADD            | PDGFA     |
| IL7             | TLR2      |
| HLA-DQB1        | CBS       |
| CD36            | DGAT2     |
| SPINK1          | SLC20A1   |
| BRIP1           | MTHFD1L   |
| TMEM51-AS1      | SMOX      |
| LINC02027       | TNFRSF12A |
| VLDLR-AS1       | SCARB1    |
| CYP2D6          | CD74      |
| THBS1           | CTSC      |

|                 |          |
|-----------------|----------|
| LINC00589       | SRD5A1   |
| MIR373          | MMP13    |
| NARF-AS1        | LCN2     |
| SLC17A5         | OCLN     |
| UFC1            | PER2     |
| MIR146B         | SLC16A1  |
| MT1DP           | CST3     |
| CCR5            | CYB5R3   |
| IATPR           | PIR      |
| ENSG00000266990 | PCTP     |
| TFEB            | RBBP4    |
| SUFU            | LOX      |
| CTSD            | BNIP3    |
| IL1A            | PLA2G4A  |
| MIR100HG        | S100A10  |
| MCU             | RBP4     |
| POMC            | SMOC1    |
| IL18            | SRM      |
| DPP4            | SOX4     |
| SLC10A2         | TPM3     |
| XPC             | DNAJB4   |
| ITGA1           | NFIA     |
| SIRT1-AS        | TNC      |
| GRP             | CD38     |
| FOXA1           | KLF5     |
| NCAM1           | ACAA2    |
| HSPA1A          | COL18A1  |
| GPR35           | FADS1    |
| HLA-G           | FUBP1    |
| LINC00554       | ISYNA1   |
| SERHL           | SOD3     |
| BAIAP2-DT       | ACSL5    |
| BUB1B           | ECI1     |
| PYGL            | CASP1    |
| IGFBP2          | BCL2L11  |
| MIR499A         | SLC2A4   |
| CAMTA1          | RCAN2    |
| CD86            | GRN      |
| PDPN            | ATF4     |
| KCTD13          | CROT     |
| CDH3            | ZBTB20   |
| MIR34B          | VNN1     |
| CXCL9           | HPGD     |
| SLC25A27        | ERCC1    |
| PRPSAP1         | SLC25A4  |
| KRTAP5-AS1      | FOXO1    |
| FAM83A-AS1      | AHCY     |
| LINC00383       | SERPINA7 |
| CCND3P1         | CHUK     |
| ENSG00000258798 | RHOU     |
| CNC2            | SLC10A1  |
| MIR27B          | DST      |
| TOP2A           | B2M      |
| CDR1            | HERPUD1  |
| ACTC1           | DBI      |
| CALR            | AIFM1    |
| MIR494          | ALDH2    |
| ARC             | SFRP2    |

|                 |           |
|-----------------|-----------|
| SOD1            | NUCB2     |
| XPA             | PSMB9     |
| PPARA           | HSD3B1    |
| IL2RB           | CTSS      |
| FOXO3           | ALCAM     |
| TNFSF15         | DDAH1     |
| BCL10           | KNG1      |
| MUC16           | FGF7      |
| POU2AF1         | PON1      |
| CECR7           | BECN1     |
| TNPO3           | POLA1     |
| HAVCR2          | TXNL1     |
| DAPK1           | ZEB2      |
| RNF6            | DNAJB1    |
| NCOA4           | SULT2A1   |
| AMACR           | KLF6      |
| LINC00173       | PALLD     |
| NPC1            | TUBB2A    |
| SIRT3           | FABP3     |
| CEL             | TNFRSF11B |
| SLC10A1         | ALDH1A7   |
| DMD             | PIK3R1    |
| VEGFD           | ACACB     |
| PFKFB1          | MBD1      |
| GLT1D1          | ATP6V1A   |
| URB2            | ARNTL     |
| DIP2C-AS1       | NFKB2     |
| FABP5P3         | RAMP1     |
| MAPKAPK5-AS1    | SNAI1     |
| LINC00926       | ADGRE1    |
| OVCH1-AS1       | BIK       |
| LINC00601       | TUBA1C    |
| HTR2A-AS1       | KEAP1     |
| SEMA6A-AS1      | UPP1      |
| CA3-AS1         | CSRP3     |
| LINC01419       | HACL1     |
| PERCC1          | KCTD12    |
| ULK4P2          | TMSB4X    |
| ENSG00000228363 | CTSH      |
| ENSG00000258711 | RSAD2     |
| ENSG00000272953 | TAP1      |
| ENSG00000265778 | GPX4      |
| ENSG00000225544 | ATP5F1B   |
| ENSG00000145063 | BCL3      |
| ENSG00000202542 | HDAC1     |
| CXCL1P1         | HNF4A     |
| ENSG00000279159 | NCF1      |
| LOC105369388    | INHBB     |
| THY1-AS1        | TAT       |
| ERBB4           | SDC4      |
| SERPINB5        | SPHK1     |
| MUC5AC          | PLK4      |
| CSF3            | RRM2B     |
| EIF2AK2         | HAL       |
| PLK1            | SLC25A30  |
| FANCC           | MCM5      |
| DDX3X           | CKS2      |
| MSLN            | GSTA5     |

|           |          |
|-----------|----------|
| LCN2      | PLCB1    |
| SLCO1B1   | NID1     |
| CD40      | SPON1    |
| CLU       | CDO1     |
| TNFSF11   | IKBK     |
| ST14      | SAA1     |
| BRD4      | SERPINA6 |
| MPO       | ABCC6    |
| SPIB      | FBLN1    |
| MMP12     | FMO1     |
| MIR98     | EIF5A    |
| CP        | TGM2     |
| PHB       | G6PD     |
| PCLAF     | CPEB2    |
| TFF1      | DAPK1    |
| ACOX2     | CYP2C29  |
| OTC       | MAP2K3   |
| TOP1      | PLK3     |
| ACCS      | RNASE4   |
| RUNX2     | EDNRB    |
| MMEL1     | MGST1    |
| CEBPA     | LGALS1   |
| NAT2      | FDPS     |
| MMP13     | MAP3K6   |
| EXO1      | TCF7     |
| S100A1    | CLDN4    |
| CXCL10    | FBXO32   |
| MUC2      | CES2     |
| APOA1     | CYB5A    |
| MMP11     | GLRX     |
| CD151     | ORM1     |
| LINC01307 | HSD11B1  |
| MLANA     | SLC6A9   |
| MIR331    | ADIPOQ   |
| MIR187    | CREB1    |
| SHH       | PEMT     |
| EIF4E     | BACE1    |
| CALB2     | NCF2     |
| ELN       | SMAD7    |
| LMNA      | ADH1     |
| CSF2      | LGALS3BP |
| CDKN2C    | NFIX     |
| TLR9      | THRA     |
| TCN1      | CKS1B    |
| KCNQ1     | KYNU     |
| NONO      | NRIP1    |
| MYCN      | SLC27A2  |
| MIR378A   | SLC6A6   |
| BUB1      | FTH1     |
| XBP1      | BTG1     |
| DLK1      | MGP      |
| EIF2AK3   | TGFBR3   |
| APOB      | CYP2C39  |
| ABCC4     | INSIG2   |
| CTNND1    | PALMD    |
| TRIM24    | TUBB6    |
| S100A4    | AQP3     |
| JUP       | RFC3     |

|          |          |
|----------|----------|
| PIP      | ABCB11   |
| SALL4    | PFKP     |
| LEPR     | TNFSF11  |
| CDH13    | ITGA1    |
| PML      | SCD2     |
| TNFRSF1A | TIMP3    |
| ATR      | VTN      |
| KLF4     | CYP26B1  |
| GADD45A  | PTPRG    |
| CTSB     | SLPI     |
| CD40LG   | RPSA     |
| MTDH     | SERPINF1 |
| SFPQ     | PLD1     |
| CD24     | APOC1    |
| MIR320A  | DDC      |
| RINT1    | MAP3K5   |
| LAMB3    | WNT4     |
| ITGA6    | FCER1G   |
| MIR299   | MASP1    |
| LNCARSR  | PSRC1    |
| HSPD1    | SPTBN1   |
| PSMB8    | TRIB1    |
| PPM1D    | PRTN3    |
| KIF1B    | CHKA     |
| PDCD4    | SLC27A1  |
| ALAD     | ERBB3    |
| FBN1     | TMPO     |
| BGLAP    | TOP1     |
| RACK1    | FAM107B  |
| HOXB13   | CYP11A1  |
| PRKN     | TRAF2    |
| MIR372   | WSB1     |
| CXCR5    | ABCG1    |
| BPIFA1   | MAP2K4   |
| ERCC3    | PEX11A   |
| SART1    | ALDH4A1  |
| SLPI     | DNAJB9   |
| FSCN1    | PDGFRA   |
| HP       | COL6A1   |
| IREB2    | PRKCZ    |
| GATA6    | SERPINB2 |
| MAD1L1   | CYBB     |
| ROCK1    | PIGR     |
| RAD18    | SH3BGRL3 |
| AMFR     | COL6A2   |
| AHR      | GLB1     |
| MIR95    | HNRNPA1  |
| MYO5B    | NUDT7    |
| CFTR     | PPL      |
| PRKAR2B  | TGFB2    |
| MIRLET7I | APOB     |
| EIF4EBP1 | STIP1    |
| IL6ST    | CFI      |
| ELAVL1   | FOXQ1    |
| CYP7A1   | INS      |
| RARA     | THYN1    |
| HES1     | CDK6     |
| PPP2R1A  | FLT1     |

|          |         |
|----------|---------|
| MIR342   | C6      |
| MXI1     | DLK1    |
| PTER     | COL4A2  |
| MIR154   | CYP27A1 |
| CHRNA3   | GAMT    |
| GHRH     | ABHD2   |
| MIR361   | CLDN7   |
| CCND3    | METTL7A |
| CA2      | PSMA1   |
| HLA-DQA1 | PRKCD   |
| GCG      | TUBB5   |
| MIR193B  | S1PR1   |
| GCNA     | CYP19A1 |
| DMBT1    | CADM1   |
| APOE     | IFI27   |
| ETV6     | SORT1   |
| RSPO1    | CYP2B2  |
| DLL4     | ROCK2   |
| DDR1     | SLC19A1 |
| PECAM1   | DSP     |
| POSTN    | SNCA    |
| HLA-C    | MARCKS  |
| EPHA3    | NFKBIZ  |
| F3       | JAG1    |
| NRP1     | BMP7    |
| SLC7A5   | CSRP1   |
| SEPSECS  | CYP2B9  |
| CSF1R    | IFRD1   |
| HNRNPK   | KPNB1   |
| PPP2R1B  | UNG     |
| PTPN1    | CHEK2   |
| FST      | SCARB2  |
| HPX      | CREM    |
| TAP1     | HADH    |
| NRG1     | ITPR3   |
| IGF2BP3  | PROCR   |
| WNT10A   | TFAP2A  |
| BMP4     | FGF1    |
| PDE8B    | KLF13   |
| TEK      | PHYH    |
| GJB2     | WFDC2   |
| ATG5     | UCP2    |
| MICA     | GUSB    |
| TACC2    | SLC22A7 |
| ATP11A   | LDLR    |
| ELOC     | MYBL1   |
| KITLG    | SLC7A5  |
| MIR206   | PDCD4   |
| POLD3    | IL1RL1  |
| TKT      | CRYAB   |
| HBEGF    | DHCR24  |
| MIA2     | ELOVL6  |
| IL3      | CPE     |
| GH1      | KLF10   |
| SERPINC1 | BAAT    |
| ILK      | CLMN    |
| ING3     | SLC10A2 |
| TPO      | GNE     |

|              |           |
|--------------|-----------|
| ELANE        | TP53INP1  |
| ASCC1        | PRKAA1    |
| CYP2A6       | IFIT2     |
| APPL1        | SLC39A8   |
| INHBA        | ISOC1     |
| CCNL1        | BAG3      |
| TDP2         | BTG3      |
| TNFRSF11B    | ALAS2     |
| AGR2         | MYH10     |
| GATA3        | CAR2      |
| CDC42        | FNDC3B    |
| MT-ND4L      | QPCT      |
| PHKA2        | ETS2      |
| JAK3         | KLHL24    |
| NDRG1        | TUBA4A    |
| TDP1         | NR1D2     |
| LOC110806263 | POU5F1    |
| ALDH1A1      | RORA      |
| CLDN4        | SERPINH1  |
| USP53        | ECE1      |
| MAX          | ENPP1     |
| MICB         | MAPKAPK2  |
| OSMR         | GALM      |
| PRSS1        | ST3GAL1   |
| GJA1         | FOXA1     |
| MIR326       | ACSS2     |
| DOCK8        | LRP1      |
| ANXA1        | RAN       |
| ACTA2        | TFF1      |
| DKC1         | GPAT3     |
| AGER         | GPC1      |
| LDHA         | PSMB8     |
| GHR          | MTHFD2    |
| CCND2        | PLPP3     |
| TRAIP        | CDC25A    |
| CEACAM6      | ARPC1B    |
| SELENBP1     | CCN4      |
| POLK         | DFFB      |
| TFAP2A       | HIPK2     |
| C7orf50      | LHX6      |
| NAMPT        | NGF       |
| CSF1         | AOX1      |
| TEX264       | ADHFE1    |
| C11orf95     | PSIP1     |
| TSHR         | PDIA4     |
| REG1A        | IFIT3     |
| PTGS1        | PHLDA3    |
| ZNRF3        | BGN       |
| GALT         | E2F3      |
| U2AF1        | GSTK1     |
| AFAP1        | PNPLA2    |
| NAPSA        | AXL       |
| NEUROD1      | HMG2      |
| KRT17        | PPAT      |
| APEX1        | RPA3      |
| ERN1         | TNFRSF10A |
| ATF4         | COL5A2    |
| S100B        | CYP2A4    |

|          |          |
|----------|----------|
| MUC6     | ETFB     |
| LPCAT1   | MOGAT1   |
| CXCR2    | ZMYND8   |
| NF2      | BGLAP    |
| BAG1     | TSC22D3  |
| VDAC1    | PLAUR    |
| CNOT9    | ADAM17   |
| FOSL1    | COTL1    |
| IQGAP1   | PTPRD    |
| BID      | TEK      |
| IL1RN    | ALDH1B1  |
| UTP6     | ALDH3A2  |
| NCOA3    | FGF21    |
| HPRT1    | OSGIN1   |
| UGT1A1   | DHRS3    |
| CS       | EZR      |
| NR1I2    | MIF      |
| ASL      | ATP1B1   |
| MIR328   | GSTM4    |
| PEBP1    | LTF      |
| FECH     | SMAD1    |
| ETV4     | PLA2G2A  |
| AIFM1    | IFI44    |
| MIR376A1 | SLC13A3  |
| NTRK2    | SELENBP1 |
| IL11     | MYD88    |
| KISS1    | GCH1     |
| CUL2     | CLIC4    |
| IDO1     | MYO1B    |
| GLI2     | SERTAD1  |
| H19-ICR  | CRIP2    |
| IKBKG    | DKK3     |
| MSMB     | CSE1L    |
| HLA-DPB1 | SLC19A2  |
| CPS1     | CDC25B   |
| LRP5     | NFKBIB   |
| CCR7     | SIRT1    |
| MAP3K5   | NR2F2    |
| SREBF2   | RGS4     |
| BCS1L    | ROCK1    |
| COL4A2   | ACAT2    |
| PLG      | CXCL9    |
| KRT13    | HNRNPAB  |
| APOBEC3G | SYNPO    |
| MIR584   | NREP     |
| MIR497   | LGR5     |
| ID1      | BCAR1    |
| ABCC8    | PA2G4    |
| MAP2K4   | PRSS8    |
| STAT4    | PSMC4    |
| MAPK10   | BLVRB    |
| KCNJ11   | GPD1     |
| TTN      | NES      |
| ERCC4    | COMMD3   |
| HPD      | GATA3    |
| RPS3A    | BMP4     |
| GSN      | FUS      |
| PRKDC    | G6PC     |

|           |          |
|-----------|----------|
| CD59      | TRADD    |
| MCM2      | FOXO3    |
| PIN1      | CYP8B1   |
| MOK       | KLF4     |
| PAK1      | CAPRIN1  |
| MIR377    | GLS2     |
| S100A7    | HBA1     |
| YBX1      | CD24A    |
| MC2R      | ISG20    |
| CCN1      | SERPING1 |
| BIRC7     | SESN1    |
| DNAH8     | LMNA     |
| LAMB1     | DPP4     |
| CADM1     | EPHX2    |
| MIR502    | CFH      |
| PGF       | CACYBP   |
| FGF1      | NT5DC2   |
| GRN       | PNPLA3   |
| TNFRSF11A | PSMB3    |
| ALAS2     | FYN      |
| TSG101    | NOTCH1   |
| VEGFB     | FSHB     |
| KRT10     | DCLK1    |
| MBL2      | RXRG     |
| ADAM10    | DHFR     |
| IBSP      | PRNP     |
| HMMR      | CRIM1    |
| DES       | FGL1     |
| NNMT      | SPARCL1  |
| MMP10     | NCOA1    |
| TAT       | TCF4     |
| IVL       | TUBB4B   |
| TH        | UGT2B1   |
| MAP3K1    | ALOX5    |
| SOX4      | HMGB1    |
| PSG2      | MARVELD3 |
| VTN       | MYLK     |
| SIL1      | NR1D1    |
| EPHB4     | PSMD12   |
| TDGF1     | SOAT1    |
| EWSR1     | SULT1C2  |
| SERPINB4  | ICA1     |
| WNT10B    | LTBP4    |
| ABCG5     | TLE1     |
| PSMB9     | TKT      |
| CYP2C9    | MATN2    |
| HCCAT5    | QSOX1    |
| FGF7      | SCPEP1   |
| MIR370    | HELLS    |
| FOXA2     | PCSK9    |
| SFN       | CES2C    |
| PTH       | ANXA6    |
| LINC01554 | TNS1     |
| RAD23B    | TMEM97   |
| XRCC6     | CCT3     |
| MMP8      | CREG1    |
| SLC51A    | FRZB     |
| ROS1      | INHBE    |

|           |         |
|-----------|---------|
| TUBB      | VAT1    |
| PTTG1     | ATPIF1  |
| INHA      | TLE2    |
| PPARGC1A  | EIF2AK3 |
| DHFR      | CDC73   |
| LDLR      | DES     |
| LTA       | GPD2    |
| APAF1     | NOLC1   |
| TCIM      | FHL1    |
| IFITM1    | OGDH    |
| TLR6      | ARPP19  |
| PNMT      | ATG12   |
| HHCM      | ERN1    |
| UHRF1     | GATM    |
| MIF       | NR4A1   |
| IRS2      | ETS1    |
| CEACAM7   | HSPA4   |
| CASC9     | LEF1    |
| RARS1     | VDAC1   |
| SGO1      | AP1S2   |
| RRAS2     | SACS    |
| SPINT2    | LGMN    |
| LAMA3     | SLC4A4  |
| NR3C1     | FGFR2   |
| CCNG1     | MX1     |
| NCOR1     | OTC     |
| MACC1     | PAK1    |
| CLDN3     | FADD    |
| SERPINA7  | ATF2    |
| PTGER4    | SLC38A2 |
| SERPINA6  | CKM     |
| TNFRSF10D | SDF2L1  |
| FAP       | JAK2    |
| EDN1      | ACKR3   |
| ADH1B     | C1QB    |
| PTPN13    | DNAJC3  |
| PTPRN     | HNRNPD  |
| SRD5A2    | MAF     |
| ABL1      | P4HA1   |
| ZFXH3     | SPAG5   |
| ELOB      | FGG     |
| ANPEP     | G6PC1   |
| H2AX      | KLF9    |
| XRCC5     | NTN1    |
| EBAG9     | SERINC3 |
| S100A6    | EIF4E   |
| RBP1      | EIF4A1  |
| CD5       | MX2     |
| BIRC2     | PSMC5   |
| SDC1      | SEPHS2  |
| RBX1      | AQP1    |
| ROBO1     | HSF1    |
| ALAS1     | ITGAM   |
| MAPK9     | HSPA1B  |
| SCTR      | DLAT    |
| MIR3658   | ETHE1   |
| FZD1      | GCNT2   |
| MIR128-1  | DHRS4   |

|           |         |
|-----------|---------|
| THY1      | LASP1   |
| TFF3      | ORC6    |
| USP8      | SDS     |
| EGLN3     | XAF1    |
| MIR7-1    | CDC42   |
| TLR5      | RHOC    |
| SLC11A2   | ZBTB16  |
| ERG       | TSPAN3  |
| HDAC2     | MDH1    |
| VTCN1     | P4HB    |
| MATK      | RELB    |
| MIR135A1  | FKBP1A  |
| MIR9-3    | GBE1    |
| ADH1C     | NOL3    |
| YY1       | TUBB2B  |
| KDM1A     | CCNE2   |
| BNIP3     | TTR     |
| LINC01139 | JUND    |
| STC2      | HSD17B2 |
| WIF1      | IDE     |
| EGLN1     | ARHGDIB |
| ECT2      | LBP     |
| GRPR      | SHC1    |
| KISS1R    | SMPD1   |
| FZD4      | DIABLO  |
| RPSA      | SULT1E1 |
| SCARB1    | GPM6B   |
| MPL       | ILK     |
| PLIN2     | CSF1    |
| ROCK2     | ACADVL  |
| SERPINB2  | CASP2   |
| ITGA3     | GFRA1   |
| MAP3K8    | TJP2    |
| NAT1      | HADHA   |
| PKP3      | COL5A1  |
| FATE1     | CSF1R   |
| CLDN6     | SELL    |
| G6PD      | TES     |
| MIR28     | BZW1    |
| CKS1B     | HSD3B5  |
| NAFLD1    | SRGN    |
| NAFLD2    | TPP1    |
| GFER      | RBPM5   |
| RB1CC1    | TGFBR1  |
| MIR196B   | TSPO    |
| MLXIPL    | AKAP12  |
| ARNT      | PER1    |
| CLIC1     | DCXR    |
| NGFR      | LIG1    |
| AVP       | RND1    |
| CDC25C    | DDX21   |
| DMPK      | EPS8    |
| MYO18B    | GAS1    |
| GSTZ1     | PSMB10  |
| PRC1      | SHCBP1  |
| SHBG      | ANP32E  |
| PRTN3     | DDIT4L  |
| PTPN12    | HPCAL1  |

|              |          |
|--------------|----------|
| AIMP2        | LPIN2    |
| WT2          | MMD      |
| PDGFB        | MMP14    |
| NSD1         | NANOG    |
| CCS          | OLFM1    |
| FCHSD1       | PABPC1   |
| SELENOI      | RPL10A   |
| SNORD42B     | TCF7L2   |
| MIR4698      | BCO1     |
| ALPG         | NDUFS3   |
| NES          | SLCO1A4  |
| HUWE1        | TFPI     |
| IL24         | GTPBP4   |
| CYP11B1      | MBD2     |
| PPOX         | PCCA     |
| SNHG16       | NDRG2    |
| TNC          | RPS3A    |
| APOC3        | SLC2A3   |
| OPCML        | PRKCE    |
| HSF1         | ITGA6    |
| FGF21        | MDK      |
| DDX58        | PRDX5    |
| CSNK2A1      | CHORDC1  |
| PCSK9        | POLE2    |
| HMGA1        | WARS1    |
| DUSP1        | FMO3     |
| PPIA         | VDR      |
| IGFBP1       | COL27A1  |
| ADAM12       | HMGN3    |
| FABP12       | MYO1D    |
| MIR330       | TMEM237  |
| CXCL1        | SDHC     |
| IL15         | TPI1     |
| GSR          | NCOR1    |
| TXN          | CXXC5    |
| ALOX5        | DACT2    |
| CLPTM1L      | LGALS8   |
| CCN4         | MYBBP1A  |
| TIAM1        | CAV2     |
| ACVR2A       | PPARGC1B |
| GNAS-AS1     | SMPD3    |
| FDPS         | DDB2     |
| SASH1        | CIDEC    |
| PLAGL1       | IMPACT   |
| IRF3         | FSCN1    |
| LPL          | GZMA     |
| NCOA1        | LRP5     |
| LOC111832670 | STOM     |
| ASGR2        | IL1R2    |
| FGF4         | DUSP5    |
| PDCD1LG2     | LAMB3    |
| HERC2        | SLC2A5   |
| TLR1         | PLIN4    |
| RIPK1        | HNMT     |
| DCUN1D1      | MVP      |
| TP53BP2      | RAB31    |
| RXRΒ         | ACOT4    |
| NQO2         | CYP2A1   |

|                 |           |
|-----------------|-----------|
| PDPK1           | INSR      |
| F2R             | HMG1      |
| BCYRN1          | MAN2B1    |
| TM6SF2          | PLIN5     |
| MIR501          | ACP5      |
| MCC             | MKNK2     |
| CIP2A           | PSMA4     |
| TPD52           | RAB30     |
| STAT5A          | CD40      |
| UCP2            | RHOA      |
| CD69            | DIO1      |
| TNFAIP3         | PEBP1     |
| MIR542          | HK2       |
| GAS8-AS1        | CNN1      |
| SAT1            | OLFML3    |
| DAXX            | ARRDC2    |
| LASP1           | CPQ       |
| MAD2L2          | ELOVL3    |
| NR1H3           | NFE2L1    |
| SELE            | ENPP3     |
| SSTR5           | PLAA      |
| ANXA10          | SATB1     |
| NEDD9           | TIPIN     |
| SURF1           | TMBIM1    |
| LYVE1           | CSAD      |
| STK4            | ENPEP     |
| MIR124-3        | LRG1      |
| CDC6            | AKR7A3    |
| CFH             | ALOX5AP   |
| UMPS            | PTPRF     |
| MIR135B         | BMP2K     |
| S100A2          | TMED3     |
| CDC5L           | TRP53INP1 |
| MDC1            | PLG       |
| ENSG00000266919 | ARHGDI1A  |
| BRMS1           | FASL      |
| MYH8            | KAT2B     |
| KLF5            | IDI1      |
| ADIPOR1         | DRAM1     |
| GPX1            | PSMC3     |
| BMP7            | SLC1A5    |
| SLC39A1         | MSH6      |
| MIR449A         | ST6GAL1   |
| RHOH            | STEAP4    |
| F10             | IL6RA     |
| SERPINB1        | MEG3      |
| STC1            | SERPINF2  |
| ASGR1           | ITGB2     |
| STAT5B          | NCOA2     |
| TGIF1           | PPP1R3B   |
| KDM5C           | ALDOC     |
| LGALS3BP        | TNFRSF1B  |
| NOS3            | BRCA2     |
| SIX1            | CKAP2     |
| MIR199A2        | CCL8      |
| FLT3            | FZD8      |
| HHEX            | IFI6      |
| B3GAT1          | FBXO30    |

|         |          |
|---------|----------|
| PRKCI   | KCNJ8    |
| ANG     | PDLIM7   |
| TINCR   | RRBP1    |
| TCF7L1  | DNAJA1   |
| COL18A1 | EFNB2    |
| CTCFL   | PSEN2    |
| NEK3    | PSMA7    |
| GAL3ST1 | GFAP     |
| SLC5A5  | PTK2B    |
| TNK2    | MMP12    |
| GNRH1   | MVD      |
| LAMTOR5 | HDC      |
| HPN     | PAWR     |
| CTAG2   | AKAP8    |
| LBR     | DYNLL1   |
| SSTR1   | SGMS1    |
| MIR885  | APLP2    |
| LATS1   | DMBT1    |
| PON1    | SYNJ2    |
| KRT15   | TAX1BP3  |
| JAG2    | CRAT     |
| EFNA1   | AGTR1A   |
| ACVR1B  | CYP2C11  |
| GRB7    | ARL4A    |
| HCP5    | PITPNC1  |
| MIR31HG | REEP5    |
| UROS    | RHBDF1   |
| AHSG    | ASPH     |
| KDM6A   | HIGD1A   |
| CSK     | PSMB5    |
| PDGFA   | RAPGEF4  |
| NAGS    | RIDA     |
| MIR574  | SLC25A10 |
| CDC25B  | CPT2     |
| DLL1    | PPP3CA   |
| GPB1    | MAOA     |
| ATP8B2  | ANG      |
| ATP8A1  | HADHB    |
| ANXA6   | CES3     |
| F2RL1   | EIF3A    |
| FER     | LGALS4   |
| TGFBR3  | MTHFD1   |
| COMT    | MYO5A    |
| SPHK1   | NDRG4    |
| MIR202  | PCX      |
| PFKFB3  | IRF1     |
| MTAP    | ADAMTS2  |
| REEP5   | COL12A1  |
| MEST    | NFIB     |
| AIP     | TXN1     |
| KL      | CFL1     |
| PPY     | MAP2     |
| TYK2    | ACHE     |
| TACSTD2 | HBEGF    |
| PLCE1   | ANPEP    |
| SLC31A1 | NFATC1   |
| RBPJ    | CPS1     |
| CD79A   | DDX5     |

|           |           |
|-----------|-----------|
| ITGA2     | FBXO5     |
| HEPH      | FOXA2     |
| TNXA      | GLO1      |
| MIR572    | LAMC1     |
| SLC15A2   | LRRFIP1   |
| MYOF      | MAL       |
| CCN3      | PGRMC1    |
| DBH       | SMO       |
| LIG4      | YWHAB     |
| ST13      | AKR1B1    |
| FOXD2-AS1 | ELK1      |
| GPR101    | FZD1      |
| IL4R      | IMPDH2    |
| ITGB3     | KIF22     |
| MSH5      | SAA3      |
| PRKD1     | TIMELESS  |
| CASP5     | HBB       |
| MCAM      | PTPN1     |
| MAGED2    | SLC11A2   |
| MAN1B1    | BCL6B     |
| YWHAE     | TCEAL8    |
| PLA2G2A   | FLNB      |
| MIR744    | CLTB      |
| KLK10     | RAD18     |
| TOR1A     | RDH11     |
| HGD       | ELF3      |
| SATB1     | NOP56     |
| MIR32     | NRAS      |
| THBD      | DGAT1     |
| MIR16-2   | HNRNPA2B1 |
| CLDN8     | TYMP      |
| BTC       | ACOT3     |
| FURIN     | EREG      |
| AKR1C1    | RUNX1     |
| PNOC      | CD86      |
| CD28      | GAS7      |
| TINF2     | HDAC6     |
| MFN2      | PRKCH     |
| TFPI2     | UGT1A9    |
| EREG      | PCK2      |
| AIRE      | CX3CL1    |
| CD247     | HSPA1L    |
| SGCE      | HPX       |
| IGFBP5    | NQO2      |
| PRRT2     | TLR3      |
| H4-16     | TNFAIP3   |
| MIR29B2   | YWHAZ     |
| ALOX12    | CLDN2     |
| ACKR3     | LSP1      |
| VIP       | PTMA      |
| SLC2A4    | AHNAK     |
| RPS6KB2   | FAM107A   |
| TMEM30A   | HEXB      |
| PRLR      | HPD       |
| THRB      | MPP1      |
| ETS2      | UBE2L6    |
| PTPA      | POLG2     |
| CUL1      | PDE4B     |

|           |          |
|-----------|----------|
| CASR      | FILIP1L  |
| MRPL58    | P4HA2    |
| DLAT      | AIF1     |
| CASP2     | CCL6     |
| CD276     | SDC1     |
| CYP8B1    | VASP     |
| SULT1A1   | ANKRD1   |
| KRT1      | PRIM1    |
| EPHA1     | SLC7A2   |
| IL5       | TNFRSF19 |
| SHC3      | USP18    |
| MIR365A   | MMP10    |
| MIR509-1  | VWF      |
| CD9       | CD37     |
| NGF       | XRN2     |
| MIR103A1  | PAM      |
| ACO1      | SMARCA2  |
| GFRA1     | CHAC1    |
| FGF5      | EEF2     |
| PRF1      | GLS      |
| TNFRSF10C | TFAM     |
| CCL26     | CYP3A2   |
| ITGAL     | ALDH9A1  |
| S100A8    | ARHGAP24 |
| CXCL14    | CD52     |
| GLOD4     | PAQR9    |
| CDK14     | SCARA5   |
| IFNAR1    | UBA7     |
| ATP8A2    | ANTXR1   |
| HSD17B1   | FEN1     |
| ACTG2     | GK       |
| IL7R      | KLF2     |
| CD63      | MAP3K14  |
| MDM4      | TBL1XR1  |
| RABL3     | TRAP1    |
| ADIPOR2   | HMGA2    |
| APP       | IGFBP7   |
| HOXB9     | PROS1    |
| TMPRSS6   | TPM4     |
| RETN      | WNT5A    |
| PRKX      | COX8A    |
| CGB3      | SEC63    |
| BDNF      | SLC48A1  |
| ATAD2     | GPT2     |
| SMAD6     | ADA      |
| BCAR1     | LAMC2    |
| AGO2      | ANGPT1   |
| WNT2B     | CAPG     |
| PNLIP     | FABP7    |
| ATP11C    | HAT1     |
| TIMELESS  | RBL2     |
| ZNF217    | TCEA3    |
| ADAM9     | IL5      |
| ONECUT1   | CARHSP1  |
| ATF3      | CD84     |
| DROSHA    | CYP2C37  |
| ACE       | DDX39A   |
| CCNE2     | LIPC     |

|           |           |
|-----------|-----------|
| TRAF6     | CTSE      |
| ABHD16A   | GRINA     |
| SLC16A4   | CCL7      |
| TGM2      | ATAD2     |
| CCAR2     | PIK3R3    |
| DRD2      | MYH6      |
| ALCAM     | ATP6V0E2  |
| PCSK1     | HIP1R     |
| CCNH      | CD83      |
| FOXC1     | TGM1      |
| ABCG8     | NAMPT     |
| ACY1      | BDH2      |
| MCM7      | COMTD1    |
| ARID4B    | GPCPD1    |
| TLR7      | LAPTM5    |
| HBB-LCR   | NFYB      |
| CTSC      | RAD23B    |
| CASP1     | RFC5      |
| IGF2BP1   | SET       |
| NET1      | TOMM20    |
| MT-ND6    | HES6      |
| GLI3      | TNFAIP8   |
| RBP4      | ABCG8     |
| PSMA7     | MAP3K8    |
| EEF1A1    | VCL       |
| IL21      | ABCD2     |
| TTK       | GJA4      |
| CTSL      | RPL32     |
| TAP2      | UOX       |
| CTSG      | ELOVL5    |
| MAP2K7    | TCP1      |
| CD58      | LY6A      |
| CCK       | SERPINA12 |
| PTPRJ     | ATL2      |
| HIF1AN    | MUG1      |
| WEE1      | RCBTB2    |
| CUL3      | TMEM47    |
| SEMA3B    | IVNS1ABP  |
| FZD8      | ADGRG1    |
| SAA1      | AMIGO2    |
| MSN       | C8B       |
| PSMG2     | CAVIN3    |
| CTHRC1    | CKAP4     |
| CDK7      | CMBL      |
| VWF       | CYP2A5    |
| SLC51B    | FABP2     |
| PSC       | MMP8      |
| PBC2      | MYOF      |
| PBC3      | PTPN3     |
| PBC4      | RRAS      |
| PBC5      | TLN1      |
| DSP       | EPAS1     |
| HNRNPA2B1 | ALDH7A1   |
| S100A9    | ZMAT3     |
| NR1I3     | CELA1     |
| FTH1      | GPC4      |
| FANCD2    | GPLD1     |
| PAX5      | IRF5      |

|             |          |
|-------------|----------|
| MTTP        | KPNA2    |
| USP7        | MAP3K1   |
| UBE3A       | AEN      |
| ECM1        | ANP32A   |
| SLC39A6     | MANF     |
| RAP1A       | IFITM3   |
| SYK         | SOX17    |
| AMH         | TRAF6    |
| LIFR        | RPL3     |
| RRM1        | YBX3     |
| SOS2        | ECHDC2   |
| LGR5        | POLD4    |
| HSPA8       | TMEM176B |
| SMARCE1     | PRKCI    |
| FABP6       | TNNI2    |
| EPHA7       | SMC4     |
| EPB41L4A-DT | BBOX1    |
| FERMT1      | LIMA1    |
| KAT2B       | TFDP1    |
| MIR218-2    | CFD      |
| TSPAN8      | C1QA     |
| RALA        | IL4R     |
| ST6GAL1     | MRC1     |
| TK1         | TPR      |
| FYN         | SLC1A2   |
| FGF8        | FMNL2    |
| LDHB        | LACTB2   |
| AGL         | MCM3     |
| LRPPRC      | PCCB     |
| HHIP        | PTGFRN   |
| NPRL2       | RASGRP2  |
| STIM1       | S100A16  |
| ARTN        | SKI      |
| ESRRA       | TM6SF1   |
| ADAR        | CSRP2    |
| MIR425      | MAP4K4   |
| SULF2       | F7       |
| GALE        | NR5A2    |
| CEMIP       | CCNC     |
| MIR184      | PPIF     |
| IGFBP7      | SPSB1    |
| ADA         | ST3GAL5  |
| CLDND1      | MAFB     |
| ITGA9       | PDIA6    |
| PRDX2       | ADH7     |
| WNT16       | GM2A     |
| ZBTB7A      | MBL2     |
| INTS6       | RPL23    |
| PRDX3       | S100G    |
| LGALS9      | H19      |
| FKSG49      | PLS3     |
| DCK         | DBP      |
| EDNRB       | BSG      |
| MAPK7       | PRDX4    |
| LTF         | RPS19    |
| TXNRD2      | REPS1    |
| MRPS27      | LAP3     |
| POLG        | BLNK     |

|             |          |
|-------------|----------|
| SNCG        | IL17A    |
| RIPK3       | PAK2     |
| HBA1        | SIPA1L2  |
| PRAME       | TACC1    |
| DKK3        | TLR5     |
| AKR1C3      | ITIH4    |
| TTR         | LIF      |
| MAP3K14     | ORM2     |
| BMX         | PCSK6    |
| SERPINA2    | PTMS     |
| TTC33       | RABGAP1L |
| CCR4        | APOC3    |
| DLL3        | ID4      |
| GLS         | MUC1     |
| CDCP1       | UGCG     |
| RAD54B      | ZFAND2A  |
| CDK5        | PLCG1    |
| ZMYND10     | DDX58    |
| TFAM        | RETSAT   |
| WNT6        | MRPL49   |
| HBA2        | PPIL3    |
| PLAT        | AHSG     |
| NCL         | DEPTOR   |
| SLC9A3R1    | PDXK     |
| HSPA1B      | PSAP     |
| MIR615      | ARRDC3   |
| MVK         | MYB      |
| PDGFC       | ARHGAP5  |
| LRRFIP2     | KHK      |
| TP53BP1     | PGM3     |
| MIR452      | PRPS1    |
| SPINT1      | SFPQ     |
| ROR2        | SH3BGRL  |
| ROR1        | SPTLC2   |
| CEBPB       | SSR3     |
| VAV2        | ZEB1     |
| HAVCR1      | DAD1     |
| HDAC6       | FOXA3    |
| SRD5A1      | MFAP2    |
| NCOR2       | PLPP2    |
| MIR302A     | PPM1K    |
| SMG1        | RCN2     |
| RPL6        | SALL1    |
| HLA-E       | SYT12    |
| FAF1        | NOCT     |
| MTSS1       | GATA4    |
| MIR4435-2HG | CLOCK    |
| LINC01194   | DCT      |
| KDM5B       | FAM43A   |
| FUT2        | SERPIND1 |
| ABCC11      | ATG5     |
| CCNA1       | ORM3     |
| GNRHR       | CDCA7    |
| KHK         | GDA      |
| ZFP36       | LBH      |
| TGM1        | OPTN     |
| FTO         | GSTT2    |
| CDH6        | SORD     |

|          |         |
|----------|---------|
| LOXL4    | SOX2    |
| BLACAT1  | ADRB3   |
| RBL1     | LAMA5   |
| CRYAA    | SLC6A8  |
| ATP11B   | CADPS2  |
| FXVD2    | CD53    |
| FTL      | EMP2    |
| AREL1    | PSMC3IP |
| PYY      | AMACR   |
| AOPEP    | IRF6    |
| TMEM8B   | NID2    |
| SIAH1    | BTF3    |
| OIT3     | CYP2D22 |
| LAMC1    | EPB41L2 |
| PRDX1    | IPO4    |
| CDH5     | LSS     |
| PARK7    | OPLAH   |
| PROX1    | PXMP2   |
| GBA      | TM4SF4  |
| CYP3A5   | ITPR1   |
| TRIM33   | GINS2   |
| SULT2A1  | RPL6    |
| SLC25A37 | SLCO1B2 |
| ACHE     | DIO3    |
| ADAM17   | RAD50   |
| ZFP57    | ADIPOR2 |
| CRYAB    | NIBAN1  |
| ALPL     | HCFC1   |
| TAGLN    | LYSMD2  |
| ACP1     | MPP7    |
| FLG      | SMPDL3B |
| NKX2-8   | RASD1   |
| CYP21A2  | APOC2   |
| DSE      | CHPT1   |
| HPGD     | EEF1G   |
| ARMC10   | IRF3    |
| WNT8B    | PCOLCE  |
| DSG3     | TLR1    |
| CYBRD1   | TNNC1   |
| FOLR1    | AXIN2   |
| CXADR    | DECR2   |
| SLC29A1  | EHD4    |
| UBE2D1   | ETFDH   |
| TPM3     | NECTIN3 |
| VCAM1    | PFKFB1  |
| TMPRSS4  | RBMS1   |
| SNCA     | ENO2    |
| DEK      | PSMB1   |
| SUGP2    | RBL1    |
| RBL2     | C8A     |
| LAMA5    | HYAL1   |
| PRKAA2   | KITL    |
| PKP1     | SPRR1A  |
| CRABP1   | TPD52L1 |
| PYGM     | ISLR    |
| DNAJC6   | IL33    |
| TBPL2    | PTX3    |
| ZNF606   | F2RL1   |

|              |          |
|--------------|----------|
| HEY1         | PER3     |
| RHOB         | APOM     |
| PON3         | NET1     |
| SCARA5       | TENT5C   |
| PDIA3        | TFF3     |
| MCM3         | ATP5F1A  |
| RAB25        | ARF1     |
| MIR345       | MIR34A   |
| PTK6         | SLK      |
| RAD52        | AKT2     |
| GPR87        | LIPE     |
| SERPINI1     | TNFAIP2  |
| MIR362       | ABHD6    |
| FXN          | ACSL3    |
| MBD4         | ECI2     |
| FUT4         | HSPA12A  |
| E2F4         | POLD3    |
| CD27         | GSTT3    |
| PTCSC1       | HSD17B6  |
| ITPR2        | LYZ      |
| MVD          | RBM3     |
| IL32         | SLC37A4  |
| WWTR1        | CELF2    |
| LOC100505549 | ETV4     |
| CD46         | IREB2    |
| L1CAM        | PRKACA   |
| FZD10        | SERPINB5 |
| CDX1         | HNRNPH1  |
| FTCD         | JUP      |
| ANXA3        | PC       |
| HDAC4        | PROC     |
| ADM          | PRKAG1   |
| CASC8        | CPD      |
| ACTN4        | MACF1    |
| DDX5         | MSRA     |
| FEZF1-AS1    | DAB2     |
| SPOP         | HTRA1    |
| PC           | SLC31A1  |
| AQP1         | MAP3K4   |
| GATA4        | TUSC3    |
| GATA2        | CCR2     |
| PTP4A1       | CAPN1    |
| ARSH         | DTX4     |
| FZD3         | RDH10    |
| PNKD         | VIL1     |
| FBXO11       | FBN2     |
| PPP2CA       | AVPR1A   |
| SESN2        | DUT      |
| SRPK1        | KRT5     |
| DGUOK-AS1    | IMPA2    |
| HIC1         | TPD52    |
| DAB2         | DUSP4    |
| LGALS7       | PLA2G7   |
| PRKACB       | PTGDS    |
| SFRP2        | SLC16A3  |
| PRKCE        | ATP6AP2  |
| SPAG9        | CSTA     |
| CYP24A1      | SESN3    |

|           |          |
|-----------|----------|
| SLC25A15  | SNX10    |
| CAP1      | TPMT     |
| TJP1      | SLC30A1  |
| ATF1      | CYP2C9   |
| CDIPT     | ABCD3    |
| LIF       | E2F4     |
| F7        | ESRRA    |
| HEY2      | FAM171A1 |
| ELF3      | SMAD4    |
| TNFRSF9   | TGIF1    |
| MIR92B    | ACADS    |
| GFAP      | GRB2     |
| PPARD     | MLH1     |
| ATOX1     | PSMA2    |
| MIR432    | DNM1L    |
| PDGFD     | TSHB     |
| AGR3      | AKR1A1   |
| DUSP6     | BCHE     |
| RARG      | AASS     |
| NISCH     | ABI2     |
| FLVCR1    | HCK      |
| GALNT12   | PKP2     |
| CCL4      | PTN      |
| UBE2C     | RPS3     |
| RCC2      | ADGRE5   |
| FZD5      | CDV3     |
| CHI3L1    | EVI2A    |
| PKLR      | RNF125   |
| HSPB2     | TENM3    |
| VCL       | AIFM2    |
| RYBP      | CCL11    |
| MIR198    | F8       |
| TRIM25    | KLK3     |
| WNT9A     | ACTN1    |
| YWHAZ     | ENO3     |
| TSPY1     | PLOD2    |
| MIR17HG   | SLC25A20 |
| LINC00963 | CSTB     |
| MLKL      | OGA      |
| ZNF148    | RRAS2    |
| API5      | EP300    |
| NR3C2     | FGFR1    |
| MMP26     | CORO1A   |
| S100P     | DUSP8    |
| IFITM3    | FBLN2    |
| RAN       | OXCT1    |
| ANXA4     | PPFIBP1  |
| NKX3-1    | TXN      |
| SLC9A5    | EBNA1BP2 |
| OR10S1    | NKTR     |
| ZNF99     | PBX3     |
| HLA-DRA   | SLBP     |
| FGFBP1    | THNSL2   |
| SEMA3A    | VAV2     |
| SOX8      | RIN2     |
| HLA-DPA1  | HRG      |
| NEDD4     | MAGED1   |
| SNHG7     | MCCC1    |

|           |          |
|-----------|----------|
| SRRT      | CALD1    |
| PHLDA2    | NFAT5    |
| PPP1R13L  | EMP1     |
| MARCHF6   | DHRS9    |
| DLD       | GNL3     |
| TPI1      | NCAPG2   |
| SCD       | RAD51C   |
| FBLN1     | BASP1    |
| BCL3      | DCK      |
| PIWIL1    | MERTK    |
| IL13RA2   | PLA2G12A |
| ATRX      | PLEC     |
| ALPI      | SEMA3C   |
| PRNP      | FBN1     |
| LINC01133 | IL13RA1  |
| PI4KA     | IL7R     |
| RICTOR    | NDUFS1   |
| DAB2IP    | CYP4F14  |
| RPA1      | NCAM1    |
| ACER3     | OSMR     |
| CD1D      | RGS5     |
| CUL4A     | CES2A    |
| SSTR4     | MCCC2    |
| SOX10     | MPDZ     |
| SBF2-AS1  | RPS20    |
| NCOA2     | SLC12A4  |
| DCLK1     | PRL      |
| WTAP      | CLYBL    |
| GGT2      | CYB561   |
| GGTLC3    | RNF4     |
| GMNN      | TCF21    |
| PAX6      | AKAP1    |
| ACOX1     | ATP1B3   |
| PIM1      | CXCL16   |
| PEA15     | ILF3     |
| PCCA      | NME2     |
| RRM2B     | BUB3     |
| RING1     | GRPEL2   |
| MAGT1     | HACD2    |
| MIR340    | SOX13    |
| CCR9      | HNF1A    |
| SLC39A4   | PDLIM5   |
| FCGBP     | SULF1    |
| ABCB7     | TEF      |
| REG3A     | XPC      |
| TRIM28    | CCL4     |
| MIR217    | PGF      |
| MAP1LC3A  | UNC5B    |
| AQP3      | RGN      |
| TBCD      | SLC29A1  |
| RASSF5    | CXCL5    |
| THBS4     | SNAI2    |
| CDC20     | ABHD5    |
| NEUROG1   | BMI1     |
| SCT       | CABLES1  |
| VCP       | DIAPH3   |
| MIR663A   | DKC1     |
| PLEC      | FAM13A   |

|              |          |
|--------------|----------|
| ACADVL       | GRB14    |
| CRABP2       | KDEL3    |
| HDAC5        | LGR4     |
| ULK1         | PAPSS1   |
| PSEN2        | RPL17    |
| PRKCG        | WLS      |
| IAPP         | CIDEA    |
| PSMD4        | CISH     |
| CSMD1        | RGCC     |
| APOD         | SPINK1   |
| RAD51L3-RFFL | CCT2     |
| KIFC1        | DAPK2    |
| SLC39A14     | IFI30    |
| GYS2         | MTAP     |
| TRAF4        | PPM1D    |
| USF2         | TMEM98   |
| MYH11        | ARNT     |
| IL33         | ATP2B1   |
| HOXA1        | SRSF7    |
| HAND2-AS1    | NR4A3    |
| HSP90AB1     | LRRC28   |
| GCKR         | USPL1    |
| MIR519D      | CBR3     |
| HIPK2        | COX4I1   |
| LAMA4        | LRRC39   |
| PLA2G4A      | SLC22A8  |
| ATF2         | PERP     |
| TRIP13       | SEC61A1  |
| MIR625       | SMAD6    |
| MIR371A      | TRAF3    |
| EPHB6        | CDA      |
| SYNE1        | ELOVL2   |
| GPRC5A       | FZD2     |
| ABI1         | PPRC1    |
| MT-CO3       | COX6A2   |
| GPBAR1       | SH3PXD2A |
| LATS2        | XRCC3    |
| SLC3A2       | FGB      |
| TNFRSF25     | ABAT     |
| INS-IGF2     | ITGA5    |
| YES1         | PRSS23   |
| CYP11A1      | VCAN     |
| ESM1         | YWHAE    |
| FOXP2        | COX6A1   |
| PHF20L1      | MASTL    |
| MIR129-2     | NFE2     |
| DEPDC1       | PLEK2    |
| ENAH         | RNF13    |
| IMMT         | TLCD4    |
| JUND         | UBA52    |
| GHRL         | CASP10   |
| PVR          | FDXR     |
| DDB1         | NGEF     |
| MIR608       | RRS1     |
| NR5A2        | SYNE1    |
| MIR92A2      | AGTPBP1  |
| GLB1         | ARIH2    |
| MIR511       | SUSD2    |

|         |          |
|---------|----------|
| TRIM37  | USP10    |
| F2RL3   | CLDN3    |
| GPNMB   | DLD      |
| BBC3    | RASSF1   |
| PER1    | ADAM10   |
| SLC5A8  | CCT8     |
| RGS22   | IL10RB   |
| ANXA7   | KMO      |
| GBE1    | MRPS18B  |
| CRH     | NUDT1    |
| VCAN    | SLC25A13 |
| KRT37   | STAU2    |
| FGB     | STK39    |
| DST     | LYN      |
| ABCD4   | VEGFC    |
| GGT3P   | ABCA3    |
| NUAK2   | NRF1     |
| ADGRE5  | PSMD4    |
| FEN1    | BHLHE41  |
| IFNL4   | NPC2     |
| MACROD1 | STAT2    |
| ECHS1   | BAMBI    |
| KRT16   | CD47     |
| BRD2    | PF4      |
| HELLS   | DHCR7    |
| SULT1E1 | ABCC8    |
| SIRT6   | ITGAX    |
| HOXA10  | PLAAT3   |
| INPPL1  | SUCLG2   |
| ZDBF2   | TPM2     |
| COL4A3  | VEGFB    |
| MIR498  | ARL4C    |
| ACKR2   | PPM1A    |
| MIR637  | SUCLG1   |
| APOH    | BCL2A1   |
| PTK7    | GOLM1    |
| S100A14 | TIAL1    |
| CSE1L   | UBA5     |
| PSMA1   | APOD     |
| CD99    | PNP      |
| LRP1    | RAC2     |
| FUCA1   | CTNNA1   |
| PRMT5   | LOXL2    |
| EFNB2   | FAAH     |
| MT-ND1  | ADAMTS4  |
| AGK     | CTSA     |
| ST3GAL6 | NUDT4    |
| MIR708  | SLC46A3  |
| KLK6    | CYP4B1   |
| PLPBP   | EBP      |
| STK33   | SORL1    |
| PENK    | VCP      |
| TRADD   | DLG1     |
| MIR411  | MTUS1    |
| TARS1   | TNFRSF25 |
| BRINP1  | DVL1     |
| MED19   | POLD2    |
| AGTR1   | IL15RA   |

|          |          |
|----------|----------|
| MIR383   | CORO6    |
| MIR1202  | ERCC4    |
| TNS4     | HSD17B11 |
| CD109    | UCP1     |
| MIR506   | WWOX     |
| NAP1L5   | ADGRL2   |
| DYNC1I2  | ELF1     |
| GPX2     | MPEG1    |
| BIN1     | MYL2     |
| DSCR8    | NDUFB6   |
| LCAT     | POLR1B   |
| TBX3     | RAB3D    |
| ERCC8    | MGST2    |
| KCNK12   | CIRBP    |
| PRSS58   | FCGR2B   |
| EEF1A2   | LTB      |
| CSNK2B   | TSC2     |
| EIF3A    | FCGR3    |
| ARFGAP1  | PSMD7    |
| COA8     | TTC3     |
| COL1A1   | CTTN     |
| MCRS1    | IER5     |
| TRAF2    | PLAGL1   |
| MYD88    | PLXNA2   |
| PTN      | TSKU     |
| SLIT2    | ZFP36L2  |
| GNA11    | FOSL2    |
| MELK     | ANKRD12  |
| COX10    | HOPX     |
| KPNA2    | IRF8     |
| SATB2    | RPS27    |
| PTGER2   | SLC23A2  |
| FZD6     | IGFBP6   |
| TRAP1    | FOXP1    |
| JUNB     | MALAT1   |
| CTBP1    | ACAA1A   |
| CASP6    | FPGS     |
| RAB23    | PRMT3    |
| BTD      | FITM2    |
| FAM3C    | ASGR1    |
| LAG3     | NUP153   |
| NNAT     | PRKD3    |
| SIRT7    | PRPF4B   |
| LYPD3    | RPF2     |
| TIMP4    | RUUBL1   |
| SLC25A11 | ESPL1    |
| EPHA4    | CCPG1    |
| NFKB2    | COQ8A    |
| KLF11    | DGKA     |
| HSD11B2  | GSDME    |
| SLC25A22 | H4C3     |
| SCG5     | MPST     |
| AGMAT    | MRPS6    |
| LGALS7B  | PCP4L1   |
| RAB27A   | SFXN1    |
| MIR339   | CYP3A25  |
| VPS53    | PFKFB3   |
| MAT2A    | PML      |

|           |         |
|-----------|---------|
| CCR3      | EPOR    |
| EIF5A2    | GRK5    |
| DNASE1    | REL     |
| ADPRH     | MAOB    |
| NTN1      | KLF15   |
| ZBTB20    | CD55    |
| NPY       | DKK1    |
| VKORC1    | ACY1    |
| RBM38     | ANGPTL2 |
| ANKRD11   | BMP5    |
| HJURP     | BORA    |
| HTRA2     | EPB41   |
| TET2      | FGF12   |
| FGA       | MYCBP2  |
| TSPAN32   | NMT2    |
| PAH       | PSMD14  |
| DNMT3L    | RGS10   |
| CCL18     | ASGR2   |
| UBC       | ERMP1   |
| PROS1     | MLPH    |
| PRDX4     | NDUFS5  |
| SGK3      | NRBP2   |
| MIR188    | S100A13 |
| BMPR2     | TTC39C  |
| HBS1L     | CRY2    |
| PRSS8     | MYH11   |
| ARHGAP5   | PLA2G6  |
| PBOV1     | PRDM2   |
| TNFAIP8L2 | LAMA3   |
| EPHA5     | MSN     |
| RHOD      | COX6B2  |
| MDH2      | CYFIP2  |
| PRMT1     | MRPL17  |
| PRKG1     | PPM1G   |
| CLDN9     | PPP1R10 |
| PTPN6     | STK17B  |
| RUNX1     | SURF4   |
| LINC00052 | HP      |
| USF1      | FGA     |
| ID2       | AP3S1   |
| DNTT      | PGS1    |
| MADCAM1   | CYP3A7  |
| PHLPP2    | SULT1B1 |
| KLF9      | ACOT7   |
| NUMB      | ACOT9   |
| RPS6      | GGH     |
| CXCL5     | GNA14   |
| BLCAP     | ITSN1   |
| MTHFD1    | PTBP1   |
| FOXP1     | RAI14   |
| FOXN3     | RCN1    |
| PGD       | S1PR3   |
| PGK1      | SH3BP5  |
| TLN1      | ST3GAL6 |
| TMEFF2    | TSPAN8  |
| SAR1A     | YPEL5   |
| PAGR1     | ACOX2   |
| MAGI2     | ANK3    |

|           |          |
|-----------|----------|
| MTR       | CLEC10A  |
| OGFR      | EPN2     |
| SELP      | LAD1     |
| LIMD1     | LIMK2    |
| EEF2      | RCL1     |
| PER2      | RPL28    |
| MR1       | SLC28A2  |
| SCO2      | TUBA8    |
| TWINK     | WDR26    |
| KAT5      | WSB2     |
| CYP27B1   | PDE5A    |
| PANTR1    | HBP1     |
| KLF17     | HYOU1    |
| P2RX7     | BBS2     |
| CCR1      | CBFA2T3  |
| CLDN5     | CTSF     |
| CISH      | EIF2B3   |
| RALBP1    | RBM19    |
| NOX4      | SSRP1    |
| DCTN1     | COX1     |
| MAML1     | STC2     |
| PTPN9     | POMC     |
| FGF23     | PRKDC    |
| NEK2      | AACS     |
| FOXK2     | AKAP9    |
| SLC2A2    | ATP6V0D2 |
| G6PC3     | CAD      |
| TUBB2A    | CD81     |
| CCR2      | EIF2S2   |
| FLI1      | FETUB    |
| LGALS4    | LBR      |
| DCN       | PCSK5    |
| TEP1      | PSMB2    |
| MIR873    | PTPRO    |
| CCT3      | SLC7A8   |
| MIR99B    | TOB1     |
| VIPR1     | TRIB2    |
| PTPN22    | CPN1     |
| MIR1468   | FADS3    |
| KCNH1     | KRT4     |
| AOC3      | PKIB     |
| MYLK      | PTER     |
| TRIM26    | RAD51B   |
| AGAP2-AS1 | RALGDS   |
| NHLRC2    | SLC38A3  |
| BCR       | BCAT1    |
| MIR1285-1 | CISD1    |
| PAWR      | CLEC2D   |
| PAK2      | FMO4     |
| TAGLN2    | HNRNPF   |
| KMT2B     | PPP3CC   |
| ELP3      | TCOF1    |
| HDAC3     | C1QC     |
| SEPTIN9   | MAPK13   |
| UNC13D    | STARD4   |
| TAB1      | STK11    |
| RCVRN     | GLDC     |
| IGBP1     | PTPRC    |

|          |         |
|----------|---------|
| SPAG5    | AGXT    |
| CLCA4    | FANCA   |
| FUBP1    | PBX1    |
| APOBEC3B | PSMC2   |
| SETX     | SLC27A5 |
| RGMB-AS1 | IDH3A   |
| MIR505   | IL12A   |
| PRKAB1   | PNRC2   |
| NDRG2    | SCCPDH  |
| CCL25    | APOH    |
| TPMT     | FUCA1   |
| IRAK1    | TRA2A   |
| TUBB3    | TRIM16  |
| CD55     | CHST11  |
| PLA2G12B | DYNLT3  |
| POTEKP   | MAD1L1  |
| RAC2     | PGPEP1  |
| HPR      | PPA2    |
| ANGPTL4  | REV3L   |
| GATA1    | TFCP2L1 |
| COMMD1   | XPOT    |
| SP100    | AKR1D1  |
| VILL     | PRPF6   |
| RAP1B    | SLC22A4 |
| SRF      | SYNCRIP |
| POU5F1B  | TWIST1  |
| MBD2     | CBLB    |
| EMP2     | GEM     |
| NLRP2    | NPPA    |
| NUP210   | SCNN1A  |
| DMTF1    | SLC47A1 |
| RARRES2  | CMPK2   |
| H4C1     | FXD5    |
| CD22     | FZD4    |
| ADAM15   | GPX7    |
| DIRAS3   | MID1P1  |
| C1RL     | PELI1   |
| MIR512-1 | CCNDBP1 |
| FAM215A  | TPK1    |
| GNLY     | ERRFI1  |
| BCL6     | APRT    |
| NUPR1    | CES1D   |
| MIR33B   | SELP    |
| SPAAR    | LRP11   |
| FHL2     | RPL7A   |
| APRT     | RTKN    |
| EFEMP1   | SAR1A   |
| SPHK2    | TMEM43  |
| CDK5RAP3 | CCL9    |
| TRIM31   | ACTG1   |
| WDR20    | GOT2    |
| TUSC1    | IFIH1   |
| HPS3     | RIPK2   |
| CHIT1    | TIA1    |
| NOVA1    | UQCRC1  |
| TACC3    | HSD11B2 |
| RSAD2    | ABI1    |
| SPTB     | ANAPC1  |

|           |          |
|-----------|----------|
| USP48     | CENPK    |
| TUSC3     | CLIC1    |
| MYOG      | ECHDC1   |
| PDHX      | FOLR2    |
| SLC25A12  | GNG11    |
| TGM3      | PLA1A    |
| SMURF2    | SOX6     |
| NTSR1     | TP53I3   |
| UFL1      | AQP9     |
| TAF1B     | CYGB     |
| UGT2B7    | FKBP4    |
| NRIP1     | LTBP1    |
| MIR671    | CLTC     |
| SLC30A5   | CTBP2    |
| ESD       | EIF3C    |
| DDX39B    | FLI1     |
| ISL1      | NDUFAB1  |
| CCNB2     | PLP2     |
| OSM       | ANGPT2   |
| RPS27A    | FZD7     |
| UCK2      | BYSL     |
| MAPK12    | CREB3    |
| XRCC4     | FEM1C    |
| TMEM30B   | FGFR1OP2 |
| TRPM7     | IL18BP   |
| GRIK1     | RASA2    |
| IST1      | C8G      |
| ERBIN     | CHDH     |
| GCK       | PLXNB1   |
| STAT2     | SAC3D1   |
| MAP3K2    | SPEG     |
| POLR2E    | ARHGAP18 |
| LINC01116 | CCN5     |
| FLNB      | DHX9     |
| NDUFAF5   | KLF11    |
| MBD6      | PIGA     |
| SLC25A2   | PRKCQ    |
| ERFE      | RBBP8    |
| PTX3      | SORBS2   |
| MAGEA9    | SPRY1    |
| GPSM2     | XRCC6    |
| ITIH4     | GJB2     |
| NDC80     | PRDX3    |
| CYP2C19   | ATR      |
| MIR630    | EFEMP1   |
| PTMA      | NEDD4L   |
| EPHX2     | OLR1     |
| STK10     | EIF2A    |
| AKIP1     | GREB1    |
| WASF2     | TMPRSS2  |
| RPS6KA3   | AIG1     |
| MAP1LC3B  | HEXA     |
| TCF19     | PKDCC    |
| CCL3      | RPL4     |
| BHLHA15   | YPEL3    |
| CANX      | CES1     |
| PRKCQ     | TDO2     |
| DDIAS     | AGL      |

|          |          |
|----------|----------|
| DDC      | GCAT     |
| ARFGAP3  | RALA     |
| SSTR3    | RETREG1  |
| MAP2K3   | RIF1     |
| MYH9     | SHISA2   |
| PDP1     | TCF12    |
| NEO1     | ABL1     |
| NFATC1   | FLNA     |
| PFKP     | MT3      |
| TRIP11   | STC1     |
| RELB     | CCDC80   |
| VPS52    | CRYZ     |
| GTF2H4   | FIGNL1   |
| MIR1-1   | PAFAH1B1 |
| NUAK1    | RGS3     |
| AMBP     | SLC13A2  |
| AHNAK    | CAMK2D   |
| NUP133   | FGFR4    |
| NUP85    | ARSA     |
| XDH      | BRD3     |
| SETDB1   | CD63     |
| IL16     | DKK2     |
| MAGI1    | EIF1     |
| ARF1     | FBXO31   |
| OSCP1    | LECT2    |
| CLEC4M   | NASP     |
| RXRG     | SCHIP1   |
| ASNS     | SRSF1    |
| CETP     | TRAF1    |
| DSG2     | GSTM6    |
| FUT8     | ZFPM1    |
| SSB      | ANGPTL3  |
| TMSB4X   | CSTF3    |
| THRA     | DMGDH    |
| GAL      | FTL1     |
| CGA      | MAPRE1   |
| RPS27    | PARP12   |
| APC2     | CARS2    |
| UPF1     | ARHGEF3  |
| CORO1C   | TJP3     |
| SMAD1    | EIF2AK2  |
| PCK1     | GLUD1    |
| CUL5     | ATP1A1   |
| ABCF1    | EIF4B    |
| MIR211   | HMBS     |
| GRB10    | LAMA1    |
| KMT2D    | ZYX      |
| PRKD3    | GTF2E2   |
| OSBPL5   | ADRA1B   |
| NME2     | BNIP3L   |
| FUT6     | IL7      |
| ATP8B4   | IRF9     |
| TMEM30CP | IFNGR1   |
| MIR134   | EIF4EBP2 |
| NR0B1    | JPT1     |
| MIR582   | SRSF11   |
| TXNIP    | DBT      |
| AGGF1    | DYRK3    |

|          |          |
|----------|----------|
| CHD1L    | ERCC3    |
| SOX1     | KLF12    |
| NLRP7    | MEOX1    |
| CFL1     | MXI1     |
| CD19     | PTPRE    |
| HMOX2    | CA3      |
| MAP1S    | CBX5     |
| PAK6     | COX17    |
| PEG3     | PFN1     |
| MT-ND5   | PSME1    |
| MTA2     | SIAH2    |
| XAF1     | B4GALNT1 |
| MIR874   | BLMH     |
| KIF11    | EIF4H    |
| PMVK     | INHBC    |
| EFNB3    | PES1     |
| EPHB1    | SH3YL1   |
| EEF2K    | ITGB6    |
| NPPC     | MBNL2    |
| CLOCK    | TRIM2    |
| IGFBP6   | CEACAM1  |
| FOXP1    | EGR3     |
| FZR1     | LY96     |
| GP5      | MFN2     |
| NT5C     | RRAD     |
| ORMDL1   | PI4KB    |
| RTL1     | NR3C2    |
| PIAS1    | CEMIP2   |
| NR4A3    | CITED4   |
| SMARCA4  | FUT8     |
| SMC4     | LYZ2     |
| CENPE    | NEB      |
| DSG1     | STEAP3   |
| TSPO     | SYTL2    |
| GCLC     | ATP2A1   |
| MIR489   | ESD      |
| RAG1     | XPO1     |
| SYNE2    | AGPAT2   |
| RARRES1  | EIF4G2   |
| ID4      | FXN      |
| RTN4     | LPGAT1   |
| MIR302B  | RNPEP    |
| SLIT3    | RPL12    |
| ENTPD1   | SEC23B   |
| GUSB     | SNRNP1   |
| ESRRG    | ABLIM1   |
| HSPA9    | EEF2K    |
| DIO2     | GC       |
| LHX1     | HPSE     |
| BLK      | ITGA3    |
| PRDX5    | MSR1     |
| KNG1     | THBS2    |
| FERMT2   | MYL9     |
| HK1      | ABHD1    |
| HNRNP1   | CIDEB    |
| CMKLR1   | MDFIC    |
| CNR1     | PTPN18   |
| SERPINF1 | SPINT1   |

|          |          |
|----------|----------|
| PCK2     | NTRK1    |
| FUT3     | ACNAT2   |
| PTGER1   | FCNA     |
| GGPS1    | CXCL3    |
| MIR448   | SIGMAR1  |
| BLZF1    | ETNK2    |
| HSPB8    | MTMR6    |
| COL1A2   | ALDH18A1 |
| UBE4B    | DACT1    |
| NR4A1    | MTR      |
| ARHGEF2  | PDHA1    |
| CSTA     | SDHB     |
| TERF2    | EIF4G1   |
| ADAMTSL1 | HEY1     |
| RAD21    | ACAA1    |
| SND1     | CGREF1   |
| PAK4     | EI24     |
| KDM6B    | IL17RB   |
| MTF1     | NCOA4    |
| EIF3H    | RAMP2    |
| SOAT1    | RHBDF2   |
| PSMD9    | SKAP2    |
| STUB1    | CYP4A1   |
| FLNA     | CAPNS1   |
| POTEF    | CYC1     |
| MIR194-1 | DAAM1    |
| PELP1    | EEF1B2   |
| SERPINH1 | FGFBP1   |
| RASSF2   | HIVEP3   |
| AATF     | MPZL1    |
| TERF1    | N4BP2L1  |
| SOX30    | RPS14    |
| TBL1XR1  | TRIM28   |
| TIA1     | UBE3A    |
| TEAD1    | TWF2     |
| MIR520D  | EIF2B4   |
| IQGAP3   | FGD6     |
| NOX1     | LYAR     |
| C10orf99 | NDUFS8   |
| TLL1     | PAFAH1B3 |
| PPP5C    | TCIRG1   |
| AGTR2    | ALDH1L1  |
| GDF2     | CD59     |
| ATP1A1   | FMO2     |
| SEMA3F   | HDAC2    |
| RECQL    | TM7SF2   |
| IL12B    | HAS2     |
| NUP160   | MAP1B    |
| SLC4A1   | ASL      |
| PNLIPRP3 | GART     |
| SLC25A5  | HNRNPDL  |
| DSC3     | SLC16A10 |
| PTP4A3   | YWHAG    |
| FABP5    | STAT5A   |
| BAG6     | ABCE1    |
| SPTBN1   | H6PD     |
| MT1G     | IFI35    |
| LLGL1    | NAB2     |

|           |          |
|-----------|----------|
| HDGFL2    | NOG      |
| GOLPH3    | PPP2CB   |
| EHMT2     | VHL      |
| RLIM      | SC5D     |
| ELL2      | ABCA6    |
| PLIN1     | ADAMTS7  |
| MIR181D   | BLCAP    |
| CDC27     | FARS2    |
| MELTF     | PHKA2    |
| SPRY2     | SMPD2    |
| PRKACG    | CACNB3   |
| NUP107    | EEPD1    |
| AHCTF1    | ETNPPL   |
| NUP43     | KANK1    |
| UBE2T     | RAB14    |
| EGLN2     | TIMM10B  |
| HOXB7     | APOA2    |
| XAGE1A    | AKR1B8   |
| RASAL2    | ATP7B    |
| IFIH1     | PSMA5    |
| FGF17     | RFC4     |
| MSI1      | FERMT2   |
| CCKAR     | GALE     |
| LCK       | HILPDA   |
| FZD9      | NPAS2    |
| LPAR2     | RAP1GAP  |
| LINC01433 | RPA1     |
| COPG2     | UBE2I    |
| CBR3      | BCKDHA   |
| VRK1      | CYB5R1   |
| TIE1      | DDX10    |
| HOXA11    | EPDR1    |
| RBBP4     | GSE1     |
| PSAP      | NMB      |
| ATXN2     | PDCD5    |
| CLPS      | AZIN1    |
| EPM2AIP1  | CD82     |
| OGDH      | SARDH    |
| BACH1     | SLCO3A1  |
| PITPNM3   | RASA4    |
| FBXO6     | SULT5A1  |
| LPAR1     | F10      |
| ASIP      | MB       |
| AKR1A1    | SLC1A3   |
| FGL2      | ASAH1    |
| ADRB2     | AKR1C1   |
| E2F5      | AKR1C3   |
| ANLN      | RPS27L   |
| FBLN5     | CHCHD10  |
| PAM16     | DUSP14   |
| NELFE     | ELOVL1   |
| MEF2D     | FRMD6    |
| SRSF1     | PAPOLA   |
| KANSL1    | RASGRP3  |
| SUMO1P3   | SLC22A2  |
| MACROH2A1 | ADAMTS15 |
| MZF1      | COL8A1   |
| TIMM8A    | EXTL1    |

|             |           |
|-------------|-----------|
| PNPT1       | HAND2     |
| GET1        | LMO7      |
| ATP9A       | NPDC1     |
| LIVAR       | SENP7     |
| MSI2        | SULT1D1   |
| CGB5        | RORC      |
| GABRA3      | ADAMTS9   |
| STMN2       | IL15      |
| FOXQ1       | PDGFC     |
| BCL11A      | STS       |
| SH2D1A      | CBX1      |
| GSDME       | CSNK2B    |
| SKA1        | CUX2      |
| REN         | FAM102A   |
| EGFL7       | H1-0      |
| CRKL        | SERPINA10 |
| CBX4        | SMYD3     |
| PLEK        | STK38     |
| SCAP        | SYT7      |
| TAPBP       | THRB      |
| STYK1       | AKR1C14   |
| CCL15       | ULK1      |
| CBR1        | GEMIN2    |
| PRKAR1B     | GRTP1     |
| EIF2B2      | EIF4A2    |
| SNRPN       | NINJ1     |
| LRBA        | SVIL      |
| SLC30A7     | KLF3      |
| NLRP5       | ME3       |
| MSH4        | MPZL2     |
| RAB3IL1     | NAV1      |
| CAB39L      | NFYA      |
| ARFGAP2     | RPL22L1   |
| ANKRD49     | SMTN      |
| MAS1L       | RELN      |
| KHDC3L      | ADAM23    |
| FAM50B      | COQ9      |
| ASTE1       | NEU2      |
| MT-TF       | WT1       |
| MT-TH       | IDH2      |
| GPR1-AS     | ECHS1     |
| DGAT1       | EMP3      |
| AKAP13      | LTBR      |
| REV3L       | NDUFS4    |
| PPP1R10     | PSMD1     |
| BCAM        | RHEB      |
| BTRC        | RPA2      |
| SLC1A5      | ADAM11    |
| CACNA1G-AS1 | BEX4      |
| WDR77       | IMPDH1    |
| NEFH        | MDM1      |
| EIF6        | SETD4     |
| CBL         | IL6ST     |
| APOM        | KITLG     |
| RDX         | TNFAIP6   |
| CKS2        | CTPS2     |
| CLEC3B      | H1F0      |
| MT-ND4      | PDZRN3    |

|              |           |
|--------------|-----------|
| PAK5         | PRELP     |
| MIR367       | PRG4      |
| IRS4         | SGO2      |
| AKR1C2       | CRYL1     |
| LIME1        | KCNN4     |
| MUS81        | PYGM      |
| NEU1         | ASRGL1    |
| KLF10        | CCNH      |
| TXNRD3       | EFHD2     |
| PHF10        | FXD6      |
| POLR1H       | RAB8B     |
| COX6B1       | SERINC2   |
| KIF7         | SSX2IP    |
| CT83         | TAP2      |
| BAGE         | CTSK      |
| C2           | RET       |
| MMP15        | ACADSB    |
| CYP4B1       | ADAMTS5   |
| ACADL        | CSF2RB    |
| HBG2         | CSNK1A1   |
| H4C13        | LIPG      |
| PLIN3        | RPS15A    |
| TET1         | SDCBP     |
| RERG         | LAMP2     |
| APEH         | LAMP1     |
| DPF3         | OGT       |
| SIRT2        | PSMB4     |
| USP22        | TUBA1A    |
| E4F1         | CHFR      |
| CTNNBIP1     | HLA-DRA   |
| BTG2         | MRPL24    |
| NDUFA4L2     | MRPL46    |
| CREB3        | MRPS18A   |
| TCTE3        | CYP2B3    |
| FCGR3A       | CYP4A12A  |
| BAG3         | MPHOSPH10 |
| SECISBP2     | NUDCD2    |
| TUBA1B       | TESK2     |
| TBK1         | AFM       |
| MIR101-2     | AGPS      |
| SIRPA        | AOX3      |
| DDIT4        | ASAH2     |
| PCDH9        | DENND2D   |
| EFCAB11      | MRPL33    |
| MAPRE1       | PSMD5     |
| GLUD1        | STAB1     |
| NSD2         | UQCR11    |
| MIR381       | ACP1      |
| GC           | CYP2F2    |
| ARRB1        | HDLBP     |
| SETD6        | IER2      |
| GLO1         | LARP6     |
| CSTB         | PLEKHA5   |
| LOC113687175 | RFC1      |
| LIN28A       | SLC43A3   |
| PLA2G1B      | TDG       |
| MIR138-2     | TSPAN5    |
| MINCR        | BMP6      |

|           |           |
|-----------|-----------|
| MIR622    | FKBPL     |
| P4HB      | TMEM115   |
| AGRN      | ARHGAP26  |
| MT1M      | NUAK1     |
| QKI       | SLC13A5   |
| PRDX6     | BMP1      |
| SP3       | CRK       |
| SUN2      | EMB       |
| GMPR      | MR1       |
| KLHDC2    | MSLN      |
| RPA2      | PSMB7     |
| LEPQTL1   | BARD1     |
| MIR422A   | C4B       |
| PSAT1     | KIF20B    |
| SPA17     | XPA       |
| GPI       | NOS1      |
| IKZF3     | HSD17B7   |
| LPXN      | CYP51     |
| CEBPD     | APCDD1    |
| DEPTOR    | EEF1E1    |
| LTBP1     | MYO1E     |
| IFI16     | OXR1      |
| PIK3C2A   | PACSIN2   |
| AKAP12    | PRRG4     |
| TRPC1     | SUCLA2    |
| PTGES     | TREM2     |
| ING5      | CD4       |
| H4C14     | FBP2      |
| AGO1      | FRAS1     |
| MIR454    | GAB1      |
| RPL18A    | PID1      |
| TUBA1A    | POU2F1    |
| PREX2     | RAPH1     |
| SMARCC1   | STARD13   |
| RIT1      | ZFHX3     |
| HM13      | BANF1     |
| DOT1L     | COPB2     |
| GPX4      | GBP3      |
| CCN6      | GLTP      |
| CBFB      | PREB      |
| FBXO30    | RNF14     |
| UGT1A9    | RPS4X     |
| GPS2      | SCAPER    |
| LPAR3     | SERPINA3K |
| GIMAP6    | BCL2L2    |
| PRKAR2A   | SPDL1     |
| POGLUT1   | STX3      |
| KLF2      | FAH       |
| UGT1A6    | GLIPR1    |
| MYCBP     | RPS6KA1   |
| HCG11     | CHCHD2    |
| PLAC1     | SHISA5    |
| RAB5A     | UGT1A2    |
| KIF20B    | PRKAA2    |
| MB        | PINK1     |
| SYNM      | ARHGAP8   |
| LINC00668 | CYP2C38   |
| WASF3     | EIF2B2    |

|              |           |
|--------------|-----------|
| MYBL2        | TMEM184C  |
| LFNG         | ZNHIT3    |
| SPG11        | NLRP3     |
| SKP1         | CDH11     |
| SQLE         | CLGN      |
| MAEL         | DBN1      |
| SFRP4        | HNRNPA3   |
| LOC108251797 | JAK3      |
| CXCL13       | SERPINA3N |
| ADCY10       | SIRPA     |
| GPSM3        | TRIO      |
| PIEZO1       | AGRN      |
| ADCY1        | FGD4      |
| ZNF251       | FKBP1B    |
| EIF4G1       | HDAC9     |
| DCST1-AS1    | LPXN      |
| KLF14        | NEBL      |
| SLC30A1      | OSBPL1A   |
| SMARCD2      | PEA15     |
| H3-3A        | POLD1     |
| ALOX15       | NOTCH2    |
| KANK1        | RACK1     |
| S100A11      | KEG1      |
| COX8A        | DPYS      |
| RPLP0        | ENAH      |
| MIR20B       | ENTPD2    |
| MAP2         | H2BC5     |
| PSMC4        | LPCAT3    |
| FUS          | MADD      |
| ZFX          | MAPK7     |
| AQP9         | PPP1R2    |
| ADORA3       | SERPINB1A |
| STK19        | TET1      |
| PLK4         | GPB1      |
| GRAMD4       | ITGA2     |
| MAP3K7       | TNFRSF9   |
| YWHAB        | GDPD5     |
| VIL1         | GFI1      |
| OLA1         | NIFK      |
| BEX2         | AATK      |
| MAGI2-AS3    | ARHGAP10  |
| DND1         | FMN2      |
| SAFB         | NOC2L     |
| NID1         | PPP2R2D   |
| CCDC88A      | ZDHHC23   |
| STAT6        | C1R       |
| MRC1         | GLI2      |
| EFNA3        | TNFSF9    |
| STK3         | TNNI3     |
| DHX9         | ADRB2     |
| AGT          | CDKN2D    |
| STIP1        | LIN7A     |
| SLC34A1      | SYN1      |
| NKX6-2       | TLR6      |
| HES7         | ALDH3A1   |
| CFC1         | SYP       |
| MESP2        | AK2       |
| MYHAS        | CDC14B    |

|         |           |
|---------|-----------|
| SSBP1   | LMAN1     |
| THORLNC | METAP2    |
| CD47    | PANK1     |
| WSPAR   | PDX1      |
| SLC9A1  | PXDN      |
| CASK    | SAMD4A    |
| XAGE1B  | SMOC2     |
| TGFB1I1 | TMED2     |
| ORMDL3  | TNFRSF11A |
| ANKLE1  | TRAF4     |
| MECP2   | UBE2H     |
| SLC12A2 | WIPF1     |
| CPD     | WNT3A     |
| TGFB1   | MUP2      |
| HLA-F   | ACER2     |
| MTHFD1L | ADSSL1    |
| OPTN    | CD151     |
| SPNS1   | CDS2      |
| CREB3L4 | ERO1B     |
| BMP10   | EXOSC8    |
| MAP3K6  | FAM114A1  |
| ASPRV1  | FLOT1     |
| MIR302C | HSPB7     |
| SOST    | LGALS9    |
| NT5E    | NKAIN1    |
| VWCE    | PABPC4    |
| UAP1    | RPS16     |
| IRF7    | TMEM245   |
| POLD2   | CHAT      |
| APOA4   | GATA6     |
| H4C11   | CALM1     |
| H4C12   | BOK       |
| H4C15   | MCAM      |
| MARCKS  | PDK2      |
| OPRM1   | AAAS      |
| TPTE2   | MIR30A    |
| TNFSF13 | NDUFA4    |
| GSDMB   | PDZK1IP1  |
| PTS     | PPP2R5A   |
| MMP16   | RNF6      |
| DPF1    | SMS       |
| RUVBL2  | SPSB4     |
| AIF1    | UCHL5     |
| NLRP3   | WDR61     |
| RND3    | CXADR     |
| CELF1   | SAMHD1    |
| TRRAP   | NR4A2     |
| HCK     | ABCA5     |
| DNM2    | CUX1      |
| DCXR    | LPP       |
| CLEC16A | TKFC      |
| EIF4B   | USP7      |
| CX3CR1  | ALDH1A2   |
| TCF3    | HAVCR1    |
| FLOT1   | SPTAN1    |
| VAPB    | BBS4      |
| FBXO5   | CYP2C54   |
| BHLHE40 | METTL9    |

|          |          |
|----------|----------|
| TTF2     | MRPS28   |
| CDH15    | PPP1R18  |
| PSME3    | RDH16    |
| GYS1     | VRK2     |
| QDPR     | ADORA2B  |
| SLC30A2  | ANO1     |
| SLC39A8  | BCAT2    |
| RHD      | CDC27    |
| CD163    | DLGAP4   |
| KLK11    | GNPDA1   |
| SPINK7   | GPHN     |
| SOX17    | MEIS1    |
| PON2     | NR2F6    |
| ANTXR1   | PIAS1    |
| MICA-AS1 | PPA1     |
| COMMD7   | RASSF5   |
| CBS      | SLC25A22 |
| GART     | BCLAF1   |
| WWP1     | FBLN5    |
| SLIT1    | CRYM     |
| XPO1     | PTPRK    |
| RPA3     | SLIT3    |
| DPP6     | TSHR     |
| DBT      | VDAC2    |
| TRPV4    | ALDH6A1  |
| AHI1     | PTHLH    |
| TRIM44   | BTC      |
| DDX53    | GIPC2    |
| DACH1    | MTMR11   |
| CALD1    | POPDC2   |
| HLA-DQB2 | TIE1     |
| CCL22    | ALDOB    |
| MIR30C2  | PPIA     |
| NKD1     | ADCY6    |
| PFN1     | ERCC6L   |
| H3C1     | FAM20C   |
| SELL     | HDAC3    |
| DHRS9    | OSBPL3   |
| CR1      | RUNX1T1  |
| CAMK4    | TAF1D    |
| FOXO4    | YBX1     |
| TCF21    | DPY30    |
| MAGEB2   | EIF3J    |
| CHD1     | MMRN2    |
| SF3B4    | ALDH1L2  |
| SLC39A13 | ARG2     |
| ATP9B    | ABHD4    |
| ATP10A   | DDX1     |
| TEX14    | FKBP11   |
| GTPBP1   | GCA      |
| MOB3B    | PTPN12   |
| ZPBP2    | PTPN21   |
| COBL     | PXMP4    |
| SVOPL    | TMEM176A |
| ZIM2-AS1 | TRAF5    |
| TAT-AS1  | ALG14    |
| FAT1     | CYP4F15  |
| OAT      | IRAK1    |

|           |          |
|-----------|----------|
| PSEN1     | LRATD1   |
| SOX5      | MBD3     |
| HGFAC     | MTMR7    |
| ABCA1     | NDUFA10  |
| SP140     | PGLYRP1  |
| HLA-DMA   | PODXL    |
| MAL2      | SLC16A6  |
| B3GALT5   | SLC22A17 |
| CHL1      | AMBP     |
| ACIN1     | MTSS1    |
| SOCS6     | NABP1    |
| CDKL2     | PIK3CD   |
| CTSK      | RPL13    |
| ETV7      | SYK      |
| CD14      | CD48     |
| NCOA6     | DNAJA4   |
| IL37      | ENTPD1   |
| GNA15     | MEIS2    |
| FGGY      | PDE7B    |
| SLC16A1   | SMPDL3A  |
| SLC22A1   | TCP11L2  |
| BTK       | CAPZB    |
| TSPAN1    | CRYAA    |
| HNRNPD    | NPTN     |
| CCT8      | ODF2     |
| NBPF12    | PEX19    |
| NKX2-2    | PLEKHA1  |
| F13A1     | PSMD13   |
| DLGAP5    | SAT2     |
| GYG2      | TMEM86A  |
| SLC25A28  | TNS2     |
| PLCG2     | TRIM22   |
| POU5F1P4  | USP3     |
| CENPF     | CYP2B13  |
| FLOT2     | C5       |
| MUCL1     | HMGA1    |
| TFPI      | IFITM2   |
| MBOAT7    | PRODH    |
| IL1RAPL2  | PTPN6    |
| TNFRSF12A | SERPINC1 |
| CA1       | SLC4A7   |
| MAGEE1    | ATF6     |
| MAGEE2    | CLCN4    |
| MAGEC3    | CLK4     |
| NSMCE3    | FKBP14   |
| THBS2     | PELO     |
| HOTAIRM1  | PHIP     |
| PIAS3     | PPFIBP2  |
| MX1       | PSME3    |
| ING4      | PUS1     |
| NDUFAF2   | SLC43A1  |
| MAFB      | TYRO3    |
| GALNT3    | CC2D1B   |
| BCL2L2    | TRIP10   |
| CAV2      | ACTG2    |
| MGAT3     | DDX17    |
| SNHG8     | PDPK1    |
| ANXA2P2   | IL13     |

|          |          |
|----------|----------|
| RDH11    | APOA5    |
| CNTF     | ASPA     |
| CXCL2    | CD8A     |
| CAPN2    | DNAJC12  |
| CYB5A    | GNA12    |
| RGN      | H2AZ1    |
| TMC2     | OIP5     |
| PTPRU    | RASL11B  |
| GBA3     | RHOQ     |
| UIMC1    | SRSF3    |
| IL17F    | DMTN     |
| QSOX1    | LIN7C    |
| ACTR3    | LSM4     |
| TMSB10   | NFS1     |
| MAP4K3   | NLRP12   |
| DDAH2    | OGFR     |
| FXD5     | PRMT7    |
| PHLPP1   | SEM1     |
| MIR19B1  | CD80     |
| CORO1A   | C1QBP    |
| BAZ2A    | CCT5     |
| IL1R1    | ENDOG    |
| SERBP1   | HDAC4    |
| MIR7-3   | INCENP   |
| CREB5    | MFAP4    |
| TATDN1   | NBN      |
| NR2F2    | RPS2     |
| ATF6B    | TGFB1I1  |
| PTPRD    | TXN2     |
| SOAT2    | AQP2     |
| HLA-DRB5 | DDB1     |
| MTCO3P1  | DHTKD1   |
| LMNB1    | EVA1A    |
| IL12RB2  | HERC6    |
| LIPC     | KPNA4    |
| IL23R    | MAN2B2   |
| PYCARD   | MXRA7    |
| PPP1R13B | MYO1C    |
| SLC46A1  | PITPNM1  |
| PTPRT    | POLR1H   |
| BCAT1    | PTPRB    |
| EPHB3    | TCEAL9   |
| MIR508   | TOB2     |
| IL23A    | CRISPLD2 |
| SAR1B    | SLC39A14 |
| RELN     | CARD10   |
| PTPRS    | COBL     |
| PSMB4    | GARS1    |
| TRIM29   | GPR155   |
| GNL3     | NFATC3   |
| TOP2B    | OTUB2    |
| MIR492   | PHLDB1   |
| PLA2G6   | PIK3CB   |
| MAP4K4   | RRP12    |
| CDK10    | SGK3     |
| SMC1A    | SMIM14   |
| PRPF19   | SRI      |
| SLC8A1   | SSBP2    |

|          |          |
|----------|----------|
| POMGNT2  | MXD1     |
| CDK9     | PDE4D    |
| FCGRT    | AMD1     |
| ERP29    | ARHGEF2  |
| FOXC2    | BAZ1A    |
| CDK8     | CHAF1A   |
| PCAT14   | EBF1     |
| IRF9     | MAP2K5   |
| ILF3     | MAP4     |
| CFD      | PHEX     |
| BPI      | PLEKHF1  |
| FIP1L1   | CNN3     |
| OBSL1    | FBH1     |
| DENND1B  | VAV3     |
| RIPK4    | VNN3     |
| EPRS1    | SLC51B   |
| H1-3     | FGFR3    |
| TUBB1    | EMC9     |
| MARK3    | ERCC8    |
| FAT4     | ETFBKMT  |
| PKD1     | NOB1     |
| ARHGAP35 | PFDN4    |
| ALKBH1   | TXLNA    |
| PPFIBP2  | CAB39    |
| RPS6KA6  | CBX2     |
| FKBP4    | ILF2     |
| PDSS2    | LAPTM4B  |
| CARD16   | MAPRE3   |
| UBAP2L   | MYOM1    |
| PES1     | SAA4     |
| FNDC5    | APH1B    |
| CX3CL1   | B4GALT6  |
| PDK1     | CDC42SE1 |
| FBL      | MCOLN2   |
| TRPV1    | RERG     |
| FLNC     | RFFL     |
| CXCR6    | RPL30    |
| HLA-DQA2 | SLC35G1  |
| HLA-DRB6 | F5       |
| CYP21A1P | B4GALT5  |
| PBX2     | CAMK2G   |
| SLC13A5  | DNAJC2   |
| PTH1R    | ITIH2    |
| EIF2AK1  | NXF1     |
| CENPB    | ONECUT1  |
| GAS6     | PCYT2    |
| IFT88    | RHPN2    |
| DUSP19   | TMTC2    |
| AHSP     | TSHZ1    |
| CNN1     | HFE      |
| KIF5B    | MSX1     |
| MAGEA2   | TRA2B    |
| PBK      | ADCY7    |
| MIR190A  | F13A1    |
| ANXA8    | GPRC5A   |
| HNF4G    | PDE4DIP  |
| TRIM65   | TOP2B    |
| SGK1     | CCL20    |

|                |          |
|----------------|----------|
| DTL            | CAMK2A   |
| VASH1          | ITGB3    |
| RPH3AL         | ARHGAP22 |
| PTGES2         | ASAP1    |
| ACACA          | CD3D     |
| PRPF8          | CLCF1    |
| CRISP3         | DAP      |
| RLN2           | DPEP1    |
| HBE1           | DTYMK    |
| ATPAF1         | ELK3     |
| FBXL2          | FMR1     |
| SPCS1          | GCGR     |
| EGID-105180392 | GZMB     |
| APOBEC3A       | IP6K2    |
| ATG7           | KNL1     |
| GSTM4          | NRXN1    |
| DACT2          | PPP1CA   |
| TNFRSF1B       | PRIM2    |
| TM4SF1         | PTPRN    |
| TFCP2          | RBBP6    |
| LOC111589215   | RECK     |
| CMTR2          | RPL15    |
| DSC2           | SAA2     |
| KLF8           | SLC22A18 |
| MIR7-2         | SLC23A1  |
| PGM1           | SOX18    |
| YWHAH          | TBXAS1   |
| CLCN3          | AGO2     |
| GSTA2          | AMPD3    |
| LNCNEF         | ATP1A2   |
| KDM3A          | LCK      |
| PDLIM7         | ACOT13   |
| TICAM1         | BEX1     |
| GYG1           | FXD3     |
| ALS2           | HAAO     |
| KLF1           | KHDRBS1  |
| FIG4           | LACTB    |
| PANK2          | LEAP2    |
| SLC33A1        | MECR     |
| HBG1           | MYO6     |
| EIF2B3         | PTGR2    |
| DNAL1          | SLC39A11 |
| PANK1          | STK4     |
| UNC13A         | WDFY3    |
| ACY3           | GNAI2    |
| ATP8B3         | CBLL1    |
| ATP10D         | CDK18    |
| HBD            | CLPP     |
| SHOX           | CLPTM1   |
| NPRL3          | DERL1    |
| PGM5           | HUNK     |
| TBC1D20        | PRKAR1B  |
| KLHL12         | SYCP3    |
| ATP10B         | TWIST2   |
| SLC37A1        | WDR36    |
| SLC37A3        | COL2A1   |
| ZNF597         | SBDS     |
| PATL1          | CYP2C40  |

|              |          |
|--------------|----------|
| INSL6        | DHX33    |
| RILPL2       | EPO      |
| PPP1R3D      | OTUD5    |
| DDX60L       | CLK1     |
| PPP1R3E      | MIR21    |
| C4orf3       | MYCN     |
| MESTIT1      | NPC1     |
| COPG2IT1     | AK1      |
| LOC108783645 | E2F7     |
| LOC109951029 | SLC34A2  |
| MAPK11       | SLC5A3   |
| ABCB5        | ABCF1    |
| DPP9         | DDR1     |
| BTG1         | CRABP1   |
| CCHCR1       | DAXX     |
| CST3         | GSPT1    |
| HSPA1L       | NBL1     |
| EIF3D        | NDUFA5   |
| UGT1A        | PROX1    |
| CUEDC2       | RPS24    |
| E2F7         | ADI1     |
| KAT8         | CCAR1    |
| UBE3C        | CLPX     |
| EIF3C        | CLSTN2   |
| PRRX1        | E2F5     |
| AQP5         | FABP6    |
| BABAM2       | GOLIM4   |
| OCIAD2       | ITPA     |
| RBBP6        | MAMDC2   |
| SMURF1       | NIPSNAP1 |
| HLA-DMB      | NME7     |
| HLA-DOA      | OSBPL6   |
| HLA-DOB      | PI4K2B   |
| HLA-DQB1-AS1 | SLFN5    |
| BCL9         | TIMM8B   |
| CEP55        | TPST1    |
| ZKSCAN1      | PPP1R1B  |
| EIF2S1       | ACOT12   |
| RPN2         | C4A      |
| TUFM         | CHD1     |
| ARHGDIA      | DMTF1    |
| CHD5         | IGSF6    |
| SUMO1        | MPHOSPH6 |
| NR2C2        | RNPS1    |
| EEF1G        | SNHG11   |
| PTBP1        | TAF9     |
| HINT1        | UTP20    |
| KCNJ5        | DUSP2    |
| SAA4         | HSD17B10 |
| CKAP4        | RASSF4   |
| DUOX1        | VKORC1   |
| PDHA1        | CSF3     |
| LPA          | A1CF     |
| H1-1         | AMOTL1   |
| CDK12        | DBNDD2   |
| ELOVL6       | NADK     |
| SELENOP      | NRG4     |
| LAMP2        | NUTF2    |

|          |          |
|----------|----------|
| H1-5     | PLSCR2   |
| BCL2L12  | SULT1C1  |
| GTF2B    | TBCB     |
| ACSL5    | ANKRD11  |
| EIF3I    | CYP2S1   |
| WASHC4   | DNAJB11  |
| SOCS2    | ELAVL1   |
| WNT8A    | NEAT1    |
| MIR619   | YWHAH    |
| H1-4     | DYRK2    |
| PHB2     | PARP9    |
| FNDC3B   | PPIC     |
| POLE2    | SPINT2   |
| TUBG1    | SLC8A1   |
| UTS2     | ATP5G1   |
| CSN2     | EXT2     |
| SLC6A2   | UBQLN4   |
| SPON2    | ABHD14B  |
| SRSF2    | ARF6     |
| MAGEA12  | ARMCX3   |
| FDFT1    | CYP2U1   |
| CSNK1D   | FANCC    |
| ADAM8    | IFNAR2   |
| HIBCH    | MAGED2   |
| TLCD3A   | NLN      |
| HOXD10   | NPEPPS   |
| NOG      | NPNT     |
| IL18R1   | NUMB     |
| BCL2A1   | PDZD2    |
| RAB38    | PPP1R15B |
| NEK7     | SERTAD2  |
| WNT9B    | ATP6V1D  |
| ACVR1    | COL14A1  |
| RPTOR    | IKBKE    |
| MAPK6    | SLC25A5  |
| GPANK1   | APBB3    |
| CXCL11   | APLP1    |
| COX4I1   | EDA2R    |
| TXNDC5   | NPPB     |
| MEF2A    | PLSCR4   |
| CCL21    | RAB43    |
| SULT1A3  | RFX4     |
| GSK3A    | S1PR5    |
| KTN1     | SLC25A19 |
| CDKN2D   | SMARCD2  |
| MIR1307  | ST7      |
| RETREG1  | TRAM2    |
| ATF5     | VPS13D   |
| TRERNA1  | MIR16    |
| MIR513A1 | NAT8F1   |
| ACLY     | DNM2     |
| HDLBP    | ITIH1    |
| ASH2L    | LPAR6    |
| HTRA1    | PLXDC2   |
| EYA4     | PSMA6    |
| PSORS1C2 | SLC44A1  |
| HCG22    | SLC6A12  |
| HLA-J    | TFR2     |

|                 |          |
|-----------------|----------|
| ENSG00000272221 | YY1      |
| MN298114-200    | CEBPG    |
| ERRFI1          | HDAC5    |
| SELPLG          | MAP1LC3A |
| AIM2            | MFN1     |
| AKR1C4          | WIPI1    |
| PCBP2           | ABHD15   |
| EHHADH          | MMD2     |
| PROK1           | NCAM2    |
| CCL1            | PHC2     |
| ABO             | PORCN    |
| ABCC5           | TMEM53   |
| TRIM21          | MTTP     |
| SKIL            | BEX3     |
| PCDH10          | CDK9     |
| ACTN1           | CETN3    |
| CCT2            | PLOD3    |
| NR6A1           | PTPRS    |
| HSPB6           | RAB1A    |
| CAPNS1          | RBMS3    |
| BPTF            | SLC16A12 |
| SDC4            | SORBS3   |
| PAXIP1          | SRPK2    |
| TRIM39          | UPP2     |
| PIWIL4          | FHIT     |
| GSTA3           | MCF2L    |
| GRK6            | PMVK     |
| RLF             | YWHAQ    |
| APOC2           | LMNB1    |
| UBE2I           | NPR3     |
| GAB2            | PNLIPRP1 |
| USP15           | ACSF2    |
| MIR613          | ACSS1    |
| LRIG3           | CCT7     |
| CRK             | CORO1C   |
| TSTD1           | FNDC5    |
| UGCG            | G2E3     |
| USP10           | LGALS1   |
| TRIM11          | MLEC     |
| USP14           | PRF1     |
| IL22            | RPS15    |
| ALDH9A1         | STRBP    |
| KHDRBS1         | SYNGR1   |
| FRS2            | USP14    |
| SOX11           | ZWILCH   |
| YBX3            | ADAM15   |
| GLIS3           | ATP11C   |
| SRRD            | CRYBG1   |
| ITPA            | CTPS     |
| HILPDA          | DYNLL2   |
| SIRT5           | GRAMD1B  |
| TLR8            | MATK     |
| PNN             | SLC14A2  |
| ICAM2           | TMEM33   |
| ISG15           | TOX      |
| SFRP5           | TTF2     |
| FASTKD2         | UNC13B   |
| MIR657          | USP47    |

|                 |          |
|-----------------|----------|
| MRC2            | SCP2     |
| SVEP1           | CDK5     |
| CEACAM4         | NEK6     |
| AZGP1           | PCDH7    |
| HSPG2           | SGK2     |
| RNF11           | ABCA8A   |
| COL11A2         | ABI3BP   |
| NKX6-1          | ANXA8    |
| HRH2            | ATF7IP   |
| DSC1            | BAIAP2L1 |
| CHD4            | CHTF18   |
| TPT1            | COQ3     |
| LMTK2           | CYP2C55  |
| LOC110283621    | EFNA5    |
| ST3GAL4         | ESPN     |
| SPRED2          | GTF2H1   |
| HNRNPDL         | MUTYH    |
| CUX1            | NRTN     |
| BIRC6           | PANX1    |
| MIR493          | PPID     |
| SOX21           | RTN4RL1  |
| ERO1A           | SELENOM  |
| FBLIM1          | STK10    |
| PNP             | TPP2     |
| CHSY1           | WWC1     |
| PABPC1          | HK1      |
| CBX7            | SLC1A4   |
| DHX16           | ADORA2A  |
| NFKBIL1         | ATP2B4   |
| NRM             | BTBD3    |
| LY6G5B          | CRADD    |
| HCG4            | IFI27L2B |
| RPL3P2          | PDZK1    |
| ENSG00000272501 | RBBP9    |
| ENSG00000199332 | SIK2     |
| ENSG00000271581 | SIRT3    |
| MGLL            | ANXA7    |
| ZHX2            | CNDP2    |
| DUOX2           | EHBP1    |
| KIF4A           | HC       |
| TBXT            | LZIC     |
| SLC5A1          | PARD3    |
| CAMK1           | SEMA3B   |
| SCYL1           | SERPINB1 |
| CRAT            | TRIT1    |
| PHGDH           | E2F2     |
| FOSL2           | SLC5A1   |
| SYCP1           | EDEM1    |
| HDAC8           | NFKBIE   |
| RAB1A           | NSD2     |
| SLCO2B1         | RGS1     |
| CD83            | RPLP0    |
| JAZF1           | TPT1     |
| CUL7            | BICC1    |
| POU2F1          | GALNT15  |
| ABCD3           | GATA2    |
| NDN             | GEMIN6   |
| MUC15           | NARF     |

|         |          |
|---------|----------|
| GPC1    | NR2C1    |
| MIR379  | PRODH2   |
| HOXA9   | RAPGEF5  |
| NPPA    | RPS13    |
| WDR46   | SMARCA5  |
| ITGB5   | STT3A    |
| NAP1L4  | TNK2     |
| TLK1    | VGLL4    |
| CRHR2   | CYP27B1  |
| PARD3   | LMCD1    |
| EGFL8   | RSRP1    |
| PPM1A   | SERPINB9 |
| LSM2    | CTDSPL   |
| DRG2    | LIMK1    |
| RPS18   | LONRF3   |
| ESRRB   | MMP16    |
| P2RY2   | NDUFB2   |
| S1PR1   | PARVA    |
| MIR638  | PCOLCE2  |
| SOX12   | SUV39H2  |
| MMP21   | TIMM9    |
| MYOD1   | TOMM40   |
| SIX2    | DOK1     |
| CENPH   | PARP16   |
| PGRMC1  | RBP2     |
| MYO6    | RNF186   |
| ETFDH   | TMPRSS6  |
| CBX8    | AQP4     |
| ADH4    | MYH9     |
| PHKG2   | RIPK1    |
| PSG9    | CORO2A   |
| CSF3R   | EIF3B    |
| CSNK2A2 | FGR      |
| GPLD1   | FJX1     |
| HNRNPA1 | FOXN3    |
| SHC4    | PRKAB1   |
| USP4    | SF1      |
| JDP2    | ST13     |
| LRG1    | TANK     |
| RPS6KA1 | TRPV2    |
| EFNB1   | WWTR1    |
| GKN1    | BLM      |
| USB1    | CA12     |
| NLRC4   | CAMK2N1  |
| WFDC1   | CAVIN2   |
| NCBP1   | CSK      |
| CORT    | GBP1     |
| DIO3    | HOXA1    |
| NID2    | LAMB2    |
| IL27    | MDH2     |
| KIF14   | PRKAR1A  |
| RUVBL1  | SLC51A   |
| TPM2    | BHMT2    |
| RP1     | CABYR    |
| NLK     | KHDRBS3  |
| POR     | MLLT6    |
| TUBA1C  | MMP17    |
| NDUFS4  | PFDN2    |

|                 |          |
|-----------------|----------|
| CTSS            | PKN2     |
| HAX1            | SART1    |
| PSORS1C3        | TSPYL4   |
| HLA-K           | VSIR     |
| HLA-W           | ZCCHC14  |
| ENSG00000272540 | KRT17    |
| ENSG00000237669 | LRP2     |
| RPL5            | NRP2     |
| MIR1204         | PPP2R2B  |
| CFHR1           | SPRY4    |
| MIR421          | NTF3     |
| THPO            | ATP6V0B  |
| ADAM28          | FAIM     |
| ANAPC11         | FN3K     |
| CYP3A7          | KPNA3    |
| ILF2            | NDUFA9   |
| ATG3            | PCYT1A   |
| RORC            | RPS18    |
| PNPLA2          | SNTG2    |
| CAMP            | SPG7     |
| PYGO2           | ZBP1     |
| CDO1            | UGT2B7   |
| CAPG            | ARSB     |
| YWHAQ           | DNAJC9   |
| COL3A1          | GLG1     |
| FOXF2           | MANBA    |
| KCNN4           | MDN1     |
| CD74            | PKP4     |
| TCP1            | SERP1    |
| CCL17           | AGR2     |
| STK17B          | GRPEL1   |
| NAP1L1          | HIBCH    |
| TNFSF9          | MATR3    |
| OSGIN1          | RAB27B   |
| UHMK1           | RNF144B  |
| TTLL12          | RNF19B   |
| LIMS1           | SCARA3   |
| UBB             | SEC24D   |
| KRT81           | SP3      |
| ARHGAP1         | DHRS7    |
| SHC2            | EEF1A2   |
| DHDH            | UQCRC2   |
| RACGAP1         | TMEM86B  |
| SH3PXD2A        | ALKBH7   |
| GEMIN4          | COQ5     |
| PHF8            | DDX27    |
| PER3            | LAG3     |
| PRICKLE4        | MTERF2   |
| MIR384          | NCBP2    |
| ST7             | POGLUT3  |
| CDCA7L          | TBC1D10A |
| KPNB1           | PSTPIP1  |
| SMARCD1         | SP110    |
| MIR765          | YIPF5    |
| PSMC1           | ACAA1B   |
| SERPINA4        | ANXA13   |
| B3GALT4         | ATXN2    |
| MIB1            | CMTM3    |

|              |          |
|--------------|----------|
| IER3         | CYP4A2   |
| UBE2Q1       | EIF4E2   |
| SRSF3        | LRATD2   |
| SKIV2L       | MEGF6    |
| FKBP1        | NETO2    |
| MIR194-2     | PAK1IP1  |
| MIR940       | PCBP4    |
| MRPL45       | PNKD     |
| SMOC2        | PRPF19   |
| GNA12        | PTBP2    |
| FOXD3        | SRPRB    |
| UCHL5        | SRPX2    |
| CCDC137      | ST3GAL2  |
| SPRY1        | UBE2D2   |
| CSNK2A3      | ADAM12   |
| GSTT2B       | CASZ1    |
| ZYX          | CDH17    |
| CCL14        | CLIC3    |
| ABCC6        | CRTAP    |
| PIM3         | ELN      |
| MIR1297      | EWSR1    |
| NCAPG        | MBNL3    |
| TTF1         | PCM1     |
| YTHDF2       | PSPC1    |
| AKAP3        | ABCC9    |
| POLR2L       | ACTA1    |
| BCORL1       | DOCK8    |
| KLKB1        | FGL2     |
| SYMPK        | GTPBP2   |
| MIR1269A     | LIPA     |
| PITX1        | NGFR     |
| ANAPC1       | SON      |
| USP9X        | ST8SIA4  |
| SMARCC2      | TUBB3    |
| HADHA        | AGTR1    |
| HSPE1        | GSTZ1    |
| APOBEC1      | HNRNPK   |
| ZNF384       | LCP1     |
| CERS2        | SHMT1    |
| ISG20L2      | REEP6    |
| CCT4         | RRAGD    |
| NDRG3        | SLC38A4  |
| E2F8         | CLIP1    |
| C5AR1        | GNA13    |
| KRT6B        | MEST     |
| RNF8         | PRKAB2   |
| TRIM39-RPP21 | RPL10    |
| EED          | SRRM2    |
| ZNF592       | SYT1     |
| SIAH2        | UGP2     |
| CDC37        | UTRN     |
| SSX2         | ABTB2    |
| LTBP2        | AKR1B7   |
| GATA5        | AQP5     |
| UNC119       | ATP6V0D1 |
| MUC17        | BIN1     |
| CTBP2        | DDX6     |
| SMTN         | LATS2    |

|                 |          |
|-----------------|----------|
| GZMA            | MIA2     |
| SOX7            | RAD54B   |
| PROM2           | REV1     |
| TRIM35          | RTP4     |
| SUOX            | SEC31A   |
| LUC7L2          | TLE3     |
| P2RX4           | TMED10   |
| SMARCD3         | TOPBP1   |
| NOB1            | XRCC4    |
| UGT2B15         | SNORD22  |
| PPT2            | C4BPA    |
| SAPCD1          | CPEB1    |
| SNHG32          | ERP27    |
| MICD            | FPR1     |
| ENSG00000288587 | GALNT7   |
| HSALNG0049430   | GTF2H5   |
| NONHSAG045982.2 | MTHFR    |
| LOC107986589    | NDUFA13  |
| ADAMTS5         | PPP5C    |
| PGAM1           | PTGR1    |
| LINC00882       | SETD7    |
| BOK             | UQCRRS1  |
| TBP             | VPS13B   |
| HSD17B8         | WDR12    |
| NEDD8           | CYP24A1  |
| MT-ND2          | AKIRIN1  |
| PDCD5           | ANAPC5   |
| LAP3            | CERT1    |
| BCLAF1          | DEDD     |
| PTPRO           | HAMP2    |
| HNRNPU          | KRTCAP2  |
| FOSB            | LAMTOR2  |
| TFAP4           | MIR200B  |
| PDLIM5          | MYO18A   |
| MAGED4B         | NFX1     |
| H4C8            | OBP2A    |
| MIR539          | ORMDL3   |
| MACF1           | RSU1     |
| MYCBP2          | SAP30    |
| ZMYND8          | SLC25A34 |
| HNRNPH2         | STRN     |
| PPIG            | TOR1B    |
| TNFRSF14        | TUBE1    |
| USP28           | CHID1    |
| TNKS2           | CYP2C7   |
| SUV39H1         | TCP11L1  |
| MEF2C           | PGAM1    |
| KRT12           | CD24     |
| MT-ATP6         | CD69     |
| MAOA            | PAH      |
| P4HA2           | SLC7A7   |
| PPP1R3B         | BAG2     |
| FGF18           | CAMKK2   |
| ENPP7           | GSTP2    |
| CXCL17          | KLHL21   |
| CCT6A           | OAF      |
| CETN2           | P2RX4    |
| PARVB           | PFN2     |

|          |           |
|----------|-----------|
| SOX18    | PTPN11    |
| APLNR    | S100P     |
| TAF11    | AJUBA     |
| SPTBN2   | CYP2C23   |
| PTAFR    | GRHL1     |
| ADAMTS1  | KDM1A     |
| FSTL1    | MMP11     |
| MT2A     | MRPL12    |
| ZNF382   | NELL2     |
| EIF4A1   | PHF20L1   |
| HECTD1   | PURA      |
| CAMK2G   | SPRED1    |
| IQCE     | PMEP1A    |
| SEPTIN4  | TUBB      |
| SPOCK1   | TIPARP    |
| FOXK1    | ADIPOR1   |
| ACTL6B   | BSCL2     |
| C5       | CDK8      |
| PPP6C    | CHCHD3    |
| CRNKL1   | DDOST     |
| BAIAP2L1 | EPS15     |
| HNRNPF   | GREM2     |
| VMP1     | H3F3B     |
| CAPZA1   | MACROH2A1 |
| HNRNPAB  | NMT1      |
| TERF2IP  | PGAP2     |
| SOD3     | PLEK      |
| LRAT     | PLPP1     |
| MIR133A2 | PPP2R2C   |
| GRK2     | PTP4A3    |
| GAGE1    | SIN3A     |
| KRT78    | TMEM14A   |
| GSTT2    | MUC5AC    |
| RNF14    | BAG4      |
| SPI1     | COPG1     |
| SLC29A2  | FKBP3     |
| MIR1271  | GGTA1     |
| PCDH20   | KRIT1     |
| BLVRB    | LIG3      |
| PRDM5    | MOK       |
| EXT1     | RASAL1    |
| FAM189B  | REEP3     |
| AMY1A    | SMC6      |
| MIR589   | SNED1     |
| MIR766   | SNRPA1    |
| SLC25A17 | SUCNR1    |
| OCLN     | TMC7      |
| ZKSCAN4  | VEZF1     |
| EIF2S2   | ZMYND11   |
| NR4A2    | HSD17B3   |
| TAF1     | ADAM19    |
| NAT10    | CHN2      |
| RNF2     | OGN       |
| MORF4L1  | OXTR      |
| FKBP5    | PSMB6     |
| CARD9    | RANGAP1   |
| CCL19    | SLC25A33  |
| SETD7    | UBE2D3    |

|          |           |
|----------|-----------|
| FOXH1    | WDHD1     |
| KHSRP    | CASKIN1   |
| TKTL1    | CDC16     |
| PSMD2    | GABPB2    |
| NEIL1    | HOXB3     |
| DNM3     | KCTD3     |
| LETMD1   | LILRB3    |
| PLOD2    | LST1      |
| CYP20A1  | MRE11A    |
| CNR2     | PAQR7     |
| RAB35    | PCBP3     |
| HUS1     | ROGDI     |
| LAMP1    | TSTD1     |
| LAMA2    | USP8      |
| ZIC1     | AGER      |
| APLN     | ATOX1     |
| TNFRSF18 | EHD2      |
| EIF2AK4  | ENDOD1    |
| CPT2     | ITIH5     |
| ALYREF   | JCHAIN    |
| ACSS2    | MAGI1     |
| GPA33    | PCDH17    |
| LTBR     | SLC30A10  |
| DXO      | TOR3A     |
| HCG25    | WIF1      |
| RPL23AP1 | PHF12     |
| RPL32P1  | PTPRT     |
| MIR520A  | TRP53INP2 |
| SOX6     | GCHFR     |
| PPP1R12A | KNSTRN    |
| G3BP1    | ITGA4     |
| MTA3     | AKTIP     |
| PSPH     | ATP11A    |
| RORA     | DDX46     |
| BCL6B    | DERL3     |
| XPO5     | FKBP10    |
| POU2F3   | G6PDX     |
| CSNK1A1L | MICAL1    |
| HOXD3    | OLFML1    |
| GARS1    | RPL27     |
| WEE2     | TAOK3     |
| MAP3K3   | ACTR3     |
| COPS3    | AGTR2     |
| PTOV1    | BCAR3     |
| ORM2     | CREBRF    |
| RPL38    | EPB41L1   |
| MGST3    | GCNT3     |
| FRAT2    | LAMA2     |
| PUF60    | OAS1      |
| ZC3H14   | RPS6KA2   |
| ADAMTS14 | ARID4A    |
| MIR302D  | ATP10D    |
| ADORA1   | CD27      |
| DKK4     | CERS5     |
| MIR1246  | MIA       |
| DDX39A   | OSBPL5    |
| RPLP2    | PELI2     |
| FSTL5    | REEP2     |

|          |          |
|----------|----------|
| RITA1    | SMG1     |
| HSD17B13 | ZHX3     |
| TLE3     | IFNB1    |
| RASSF10  | TM4SF1   |
| DKK2     | ATOH8    |
| SRY      | COX6C    |
| RGS17    | HDGF     |
| DNAJB4   | HMCN1    |
| H4C3     | LPCAT1   |
| TCIRG1   | LSR      |
| DCD      | PEG10    |
| CD2BP2   | PHB2     |
| PIK3IP1  | PLXNC1   |
| SLC19A1  | SNAP23   |
| KIR3DS1  | CRY1     |
| ITCH     | ACTR1A   |
| CD226    | ACTR6    |
| UCN      | ASH2L    |
| CYP2B6   | ATN1     |
| INTS5    | CCDC28B  |
| IRAK4    | GET1     |
| AARS1    | PCSK4    |
| AVPR1A   | SLC25A42 |
| CD2AP    | COLEC12  |
| MGST2    | ERBB4    |
| GSTM5    | GFRA2    |
| GSTA5    | GLA      |
| NFATC2   | LPO      |
| SLC39A7  | MSX2     |
| CASP14   | NAV3     |
| H2BC14   | RAD23A   |
| KDM5A    | RANBP1   |
| NFIC     | SKIL     |
| HIF3A    | ABCB9    |
| GGCX     | AHCYL1   |
| KLF12    | APLNR    |
| MT-ND3   | BST1     |
| CXXC5    | CGN      |
| ALX4     | DOCK10   |
| TROAP    | GFOD1    |
| PLAAT4   | HKDC1    |
| EPHA10   | ITGB7    |
| CYP2J2   | PILRA    |
| PTPRA    | PIM2     |
| NODAL    | QDPR     |
| BTBD7    | SAP18    |
| MIR545   | SCLY     |
| PI4K2A   | SLC16A5  |
| SHPRH    | SLC24A3  |
| CARD10   | SLC38A5  |
| PRR11    | TBX3     |
| SKI      | TFB1M    |
| CYP26B1  | UBE2K    |
| FOXP4    | WDR4     |
| MCM6     | CRABP2   |
| EDN3     | IL11     |
| RXFP2    | DHX38    |
| EIF5A    | HAPLN2   |

|                 |          |
|-----------------|----------|
| SHMT2           | STK11IP  |
| HYOU1           | TBP      |
| DNM1L           | ATP6V0A1 |
| METT121A        | DDT      |
| VPS54           | EVL      |
| EEF1AKMT3       | HSD17B12 |
| LINC01451       | MBNL1    |
| ENSG00000216663 | MEOX2    |
| FADS2           | CLEC4D   |
| COMP            | COMMD10  |
| ANP32A          | EGFL6    |
| POLI            | ESYT1    |
| ATP5F1A         | GLT8D1   |
| CLDN2           | MYH1     |
| OGT             | NCOA6    |
| NACA            | PNPO     |
| ZNF418          | RNF144A  |
| MCM3AP          | SLC35B1  |
| BNC2            | THRAP3   |
| CCNL2           | TRIP12   |
| MIR300          | WDFY1    |
| TP53INP1        | ZNRF1    |
| IRAK3           | B4GALT1  |
| EVA1A           | COL7A1   |
| FUT7            | CTNNAL1  |
| GFUS            | FAM162A  |
| PIK3R5          | FAM214A  |
| HSPH1           | IL2RB    |
| HNRNPL          | ITGA7    |
| KLB             | LRP8     |
| MTRR            | PPP1CB   |
| TUBB4B          | PRICKLE1 |
| SSRP1           | TTPA     |
| ATP5IF1         | TRAPPC4  |
| ZNHIT3          | ADGRL1   |
| ISX             | AGPAT4   |
| MBNL3           | AQP8     |
| BCL2L10         | COX7A2   |
| CTPS1           | HABP2    |
| CENPA           | HAUS4    |
| IL11RA          | LAT      |
| MRTFA           | PGRMC2   |
| PAPPA           | PMM1     |
| MIG7            | RFC2     |
| PEX1            | SLC9A3   |
| SGTA            | SMURF2   |
| SYNJ2BP         | ST3GAL4  |
| UBR5            | ULK2     |
| ACP5            | CCR7     |
| TNIP1           | BHLHB9   |
| DUXAP10         | DMXL1    |
| DLX4            | OGFOD1   |
| EDIL3           | QTRT1    |
| EGR2            | SLC49A4  |
| ATG4B           | STAM     |
| NUDT1           | SULT2A2  |
| SERPINA5        | TERF2IP  |
| PPP1R15A        | WBP4     |

|                 |          |
|-----------------|----------|
| B4GALT1         | IL6R     |
| MIR216B         | ACAD9    |
| GLDC            | ADAM9    |
| RBBP5           | CIT      |
| H2BC4           | DHX58    |
| GABPA           | GASK1B   |
| RFX1            | PYCR1    |
| MT1X            | RFTN1    |
| GCNT3           | TRIM25   |
| SUPT3H          | TSPAN4   |
| MIR718          | ATP2B2   |
| AMER1           | CCT6A    |
| AKR1B1          | CHD2     |
| CCT7            | DLL1     |
| RAB11B          | PARP14   |
| TSIX            | PFKM     |
| NEFL            | PTGIS    |
| AICDA           | STEAP1   |
| MIR570          | GUCY1B1  |
| BTG3            | GUCY1A1  |
| IRF2            | KRT10    |
| F2RL2           | AGXT2    |
| ING2            | CES2E    |
| RNASE3          | LIMD2    |
| PCDH17          | MRAP     |
| STRAP           | MRPL18   |
| NCK1            | NDUFS2   |
| ADAMTS13        | NELFE    |
| KRT9            | PPP1R14C |
| MRPS34          | PSTPIP2  |
| ARG2            | RPS25    |
| UBE2S           | SALL4    |
| TRIM31-AS1      | STARD5   |
| RNY4P10         | USP53    |
| HLA-DPA3        | AZIN2    |
| ENSG00000232080 | H4C11    |
| ENSG00000259053 | MEIS3    |
| PKHD1           | MUP5     |
| MYO1B           | NAT8F5   |
| SLC35A3         | PRUNE1   |
| UBR4            | TBX6     |
| PDCD6           | TMEM199  |
| PIK3C3          | AIMP1    |
| PFAS            | IFRD2    |
| ITGAM           | IGSF3    |
| H2BC21          | NDUFAF4  |
| TARBP2          | NOC3L    |
| GOT1            | PTPRU    |
| OTUD7B          | RNF128   |
| MT1F            | TBC1D8   |
| TEX10           | TRAM1    |
| TUBB2B          | ALOX12   |
| CD5L            | CLEC7A   |
| KIF20A          | CTSZ     |
| UTS2R           | DNAJC10  |
| MIR301B         | DUSP3    |
| LOC111832671    | HTT      |
| SMYD4           | LY86     |

|          |          |
|----------|----------|
| FRK      | MACROD1  |
| CTSH     | NAA15    |
| FAIM2    | NKX3-1   |
| FKBP10   | PRPS2    |
| TIGAR    | SEL1L3   |
| PET117   | TACC2    |
| STING1   | UAP1L1   |
| ENTPD2   | WNT11    |
| UCP1     | ATP7A    |
| H4C2     | CCNL1    |
| H4C4     | DBF4     |
| MFF      | ERCC2    |
| DHX33    | LFNG     |
| CDC42EP3 | METRNL   |
| DMWD     | RPL31    |
| ALDH1L1  | SLC46A1  |
| CLDN11   | SOCS1    |
| ZNF350   | DYNC1H1  |
| HOXC8    | GREM1    |
| MIR1301  | SLC25A25 |
| DLG2     | ACP6     |
| CSPG4    | ADGRF1   |
| ZBTB16   | CDC123   |
| C1GALT1  | CUL5     |
| MIR612   | H2BC14   |
| BNIP3L   | MMADHC   |
| NPR1     | NFYC     |
| PKP2     | PEX5     |
| VASH2    | TTL      |
| CDK3     | ZNF608   |
| CCT5     | AGTRAP   |
| ST7L     | ARPC4    |
| NPAS2    | ATAD3A   |
| ACSS1    | ATP5MC1  |
| BST2     | CHD1L    |
| IGFBP4   | CHST14   |
| EHD2     | DEGS1    |
| STK38    | EXOC4    |
| SLC34A2  | FAM222A  |
| CKS1BP7  | FRK      |
| ZRANB1   | KYAT3    |
| AFM      | LIMS1    |
| SETD1B   | LLGL2    |
| FBXO22   | MYOM2    |
| MERTK    | PRPF8    |
| SPRED1   | SEZ6     |
| SNAPIN   | SLC25A29 |
| GALNT14  | TRMT1    |
| SSBP2    | UBE2S    |
| GRHL2    | WDR75    |
| KMT5A    | ZC2HC1A  |
| RUBCN    | CRYBB3   |
| HOXC6    | ALS2     |
| BAMBI    | CD302    |
| ENDOG    | CLSTN3   |
| RPL39L   | FCGRT    |
| BMF      | FLT4     |
| WARS1    | GPR146   |

|              |         |
|--------------|---------|
| PPP1R9B      | MIR22   |
| HOXB-AS3     | MST1    |
| TAB3         | NDST1   |
| BCL2L15      | RBX1    |
| FOXR2        | S100A14 |
| UBA1         | SMC3    |
| MIR484       | ARID5B  |
| CADM2        | FNBP1   |
| SHOX2        | IVD     |
| LOC110594336 | KRT15   |
| MAPKAPK5     | PYGB    |
| PADI4        | SLC16A7 |
| MSBP1        | MYO5B   |
| PTP4A2       | NEXN    |
| MIR135A2     | PDLIM3  |
| ARL6IP5      | PLXNB2  |
| MAGED1       | PRKAR2A |
| ARHGDIB      | RASA1   |
| BTF3         | RHOBTB1 |
| MAT2B        | RHOBTB3 |
| TSPYL5       | SLC12A3 |
| MIR504       | SLC6A13 |
| SLC38A1      | TNFSF14 |
| GALR2        | VAMP8   |
| FUT1         | ARL8A   |
| KDM4A        | KATNAL1 |
| GABBR1       | KLRK1   |
| TRIM66       | MRPL57  |
| MIR548C      | RPE     |
| RCAN1        | TMEM147 |
| EP400        | EDNRA   |
| SCAMP3       | ACTC1   |
| PHETA1       | ETV5    |
| CBX5         | LOXL1   |
| HLF          | NEDD4   |
| CPEB3        | EPB41L3 |
| SALL3        | NCOA7   |
| MIR9-1HG     | AGFG2   |
| NDUFS1       | CACNB1  |
| VANGL1       | FCHO2   |
| TGFBRAP1     | FOXP4   |
| MIR365B      | GTF2A1  |
| GLG1         | HM13    |
| SRGN         | ILDR2   |
| MPG          | MAGEH1  |
| SENP7        | MYLPF   |
| PCBD1        | PATL1   |
| GSS          | RBM34   |
| PIWIL2       | ROS1    |
| CHRNA7       | UBR1    |
| ATIC         | DYSF    |
| SIGLEC1      | EPHA1   |
| NFAT5        | H2BC21  |
| PFKFB4       | ITGA8   |
| INCENP       | MYADM   |
| MUC13        | NCALD   |
| PIGU         | OAS2    |
| VPS35        | PPP2R2A |

|          |          |
|----------|----------|
| HNRNPC   | SEMA6D   |
| NRF1     | SFXN2    |
| RASSF6   | SIVA1    |
| TRPC6    | TNPO1    |
| UNG      | UBE2N    |
| HERC5    | ACSM1    |
| VSIR     | ADSL     |
| MCPH1    | AP2A1    |
| PTPRF    | ASAP2    |
| EFNA5    | BPNT2    |
| GDI2     | CHSY1    |
| DHCR24   | CKMT2    |
| APOBEC3H | FOXO4    |
| CDCA5    | FXYP1    |
| NCOA5    | HR       |
| FAM83D   | IER5L    |
| DFFB     | KAT5     |
| SERPIND1 | LHX1     |
| CES1     | MAP4K1   |
| CPEB4    | NT5C2    |
| NLRC5    | PKD1     |
| ARHGEF5  | PLEKHG3  |
| SCYL2    | SCGB1A1  |
| IRX3     | SIPA1L1  |
| SLC26A5  | SLA      |
| GIN5     | SMAD5    |
| ATOH8    | SNRPE    |
| NASP     | SRRM1    |
| MASP2    | SURF1    |
| RTCB     | TMEM45B  |
| MTBP     | TTPAL    |
| PPP1CC   | UBE4B    |
| FBXO4    | ZFPM2    |
| LCP1     | KLK1B4   |
| NSUN2    | LPAR1    |
| HMGB3    | PRKACB   |
| RPRD1B   | RYR1     |
| MIR650   | MITF     |
| YWHAG    | ANTXR2   |
| P2RX3    | AS3MT    |
| MAGEC1   | CREB5    |
| INSL3    | AHRR     |
| TRO      | AZGP1    |
| CCL8     | FRMD4A   |
| AQP8     | HIVEP2   |
| HACE1    | RBPJ     |
| PFKFB2   | TBX21    |
| RGS5     | TFDP2    |
| BLVRA    | B3GALNT1 |
| MCUR1    | C2CD2    |
| PDZK1    | CAPN5    |
| ARMC8    | CBX7     |
| NCR3     | CD70     |
| C1QTNF6  | COL4A5   |
| ITPR3    | GMDS     |
| CD200R1  | HAO1     |
| PKD2     | HEATR1   |
| MAP2K6   | HEBP2    |

|                |           |
|----------------|-----------|
| PRSS3          | HNRNPR    |
| IL10RB         | ITPKA     |
| GLP1R          | JARID2    |
| UGDH           | PIPOX     |
| RTKN           | PREX1     |
| PLAC8          | RAB38     |
| ADAMTS4        | RPL8      |
| AJAP1          | SCN8A     |
| PPP1R11        | TAX1BP1   |
| RNF39          | TMEM140   |
| VWA7           | XPNPPEP2  |
| HCG17          | PVR       |
| Inc-HLA-DPA1-2 | SLC1A1    |
| piR-38257-014  | CMTM6     |
| CTNNA3         | DROSHA    |
| CCNC           | DYNC2LI1  |
| SSX5           | ELP4      |
| ABCB6          | EML2      |
| CSN1S1         | FITM1     |
| TRPM2          | GBA       |
| RPL4           | H1F2      |
| ZIC2           | H3C15     |
| CTNND2         | HMGN5     |
| CHST11         | IFT172    |
| PCDH19         | LZTFL1    |
| CAB39          | MAGOH     |
| EDARADD        | MANEA     |
| KRT28          | MOCS1     |
| KRT73          | NCK2      |
| HEG1           | NEK4      |
| GFPT1          | NUS1      |
| PPIL3          | PHKG2     |
| MBNL2          | PPDPF     |
| TNFAIP8        | PRSS2     |
| TRIM14         | RPL36     |
| TRDMT1         | RPS21     |
| FOXJ2          | RREB1     |
| RND1           | SLC35D1   |
| MIR644A        | SLC38A6   |
| DARS1          | SOCS5     |
| CMTM3          | SSBP3     |
| UBE2L3         | SSH1      |
| KIF18A         | TMEM132A  |
| ITGB8          | AKR1C18   |
| LTB            | ASB13     |
| CYP2W1         | LARP4B    |
| CKAP5          | LMBRD1    |
| IL9            | LYPLAL1   |
| GANAB          | MTF2      |
| ZGPAT          | NSD3      |
| PSMC5          | SLC45A4   |
| DHX15          | TMLHE     |
| SPANXC         | CXCL13    |
| POLR2A         | GABARAPL1 |
| RPS15A         | SLC22A3   |
| ASAP3          | CXCR1     |
| NDUFV1         | GNAI3     |
| COA3           | GULP1     |

|              |          |
|--------------|----------|
| PRDM1        | IFNGR2   |
| MT1H         | SCG5     |
| CAMKK2       | SGO1     |
| MIR577       | SLC41A2  |
| KIR3DL1      | SQOR     |
| SSX1         | ALDH5A1  |
| TREM1        | BST2     |
| MIR433       | NRCAM    |
| LOC112529895 | CSF3R    |
| MIR1207      | GNAT1    |
| RBM1A1       | HIF3A    |
| MIR203B      | HMGCL    |
| EFTUD2       | PKIA     |
| MGAT4A       | PPAN     |
| UPP1         | PRXL2A   |
| HSPA2        | RAD21    |
| PSMC3        | SLC2A9   |
| GORAB        | SLC44A4  |
| POFUT1       | SPATA13  |
| SENP2        | TMOD1    |
| ATG12        | CDK5R1   |
| WWP2         | COX5A    |
| CISD2        | DFFA     |
| ASIC1        | KLKB1    |
| UQCC1        | PEPD     |
| GLYATL1      | APBB1IP  |
| XCL1         | APPL2    |
| RNF38        | ARSG     |
| LRIG2        | BTD      |
| BNC1         | CITED1   |
| S100A10      | GBP6     |
| PDCD6IP      | GPC6     |
| NUDT21       | HLTF     |
| XCR1         | IGF2BP2  |
| PDIA6        | MAPK8IP3 |
| CBLB         | MBD4     |
| DUSP10       | MIR222   |
| PSIP1        | PAN2     |
| TNS2         | RPL34    |
| ASRGL1       | SLC45A3  |
| MIR153-2     | TCEA2    |
| MIR3127      | TIMM10   |
| SIK2         | TNNT3    |
| CDK13        | ALOX12B  |
| SLC22A17     | AP2A2    |
| PSMD1        | ARHGAP1  |
| PRKCSH       | CAR14    |
| ME1          | CIZ1     |
| H2BS1        | CRTC2    |
| TMOD1        | CTLA2A   |
| AMPD3        | CYP2J2   |
| SUZ12        | FBXO21   |
| DYNC1H1      | GALK1    |
| HAO2         | GIPC1    |
| FCN3         | GPI      |
| SMARCA5      | JADE1    |
| SLC22A2      | LRIG1    |
| ACVRL1       | LSAMP    |

|              |          |
|--------------|----------|
| FGFRL1       | MSC      |
| SUMO3        | MYL1     |
| SDC2         | NDUFS6   |
| DUT          | NUCKS1   |
| H4C6         | OBSCN    |
| RAB11A       | RAB24    |
| C1D          | RPS7     |
| IQGAP2       | SETD1B   |
| PHF19        | SNX24    |
| MIR876       | TMED7    |
| PCNT         | ADGRA3   |
| STOML2       | DOK2     |
| GCNT2        | FOXRED2  |
| ALDH7A1      | HOXD3    |
| LPAR6        | LSM2     |
| CRYL1        | MAD2L2   |
| MIR592       | NDFIP2   |
| EMP3         | PSMG2    |
| GIT1         | RIC8A    |
| GNAO1        | SSH2     |
| TWIST2       | TBC1D17  |
| RSPO2        | MUP1     |
| MPV17        | SHROOM1  |
| NOD1         | SLC17A4  |
| USP18        | NAT1     |
| CTH          | ELL2     |
| SEC16B       | INPP5D   |
| HNRNPM       | ARHGEF7  |
| FPR2         | B3GNT2   |
| PCBP1        | CDS1     |
| MT1A         | GSTO2    |
| ANKHD1       | IMPA1    |
| CMTM5        | MTARC1   |
| LXN          | NDUFA1   |
| LOC107982234 | NIN      |
| H3-4         | RHBG     |
| PDE4D        | SH3GLB1  |
| MIR655       | SLC5A6   |
| PATZ1        | STAMBPL1 |
| SNW1         | TICAM1   |
| PIDD1        | TSPAN13  |
| FBXO31       | WNT10B   |
| ASCL2        | CYP2A6   |
| SDCBP        | CACNA1G  |
| ADAMTS9      | ITGB4    |
| IPO7         | ABCA2    |
| PKMYT1       | ADAMTSL4 |
| SUMO2        | AHSA1    |
| NUF2         | ANP32B   |
| H4C9         | ATG4B    |
| H4C5         | CAR8     |
| CIZ1         | CLEC11A  |
| BCL2L14      | DHX30    |
| FMNL2        | GINS3    |
| MRTFB        | HDHD3    |
| THOP1        | JAM2     |
| KDEL2        | KYAT1    |
| SEC62-AS1    | LTBP2    |

|              |          |
|--------------|----------|
| GLRX         | NAGK     |
| CFAP45       | NDUFV1   |
| KRT75        | NDUFV3   |
| SEPTIN2      | NXN      |
| ACKR1        | PDCD11   |
| GTF2I        | UGT2A3   |
| VPS4B        | VAV1     |
| DHPS         | ADK      |
| POLR2C       | BCL10    |
| HOXA7        | NCEH1    |
| C11orf65     | P2RY2    |
| LOC108942766 | SMARCA4  |
| SNHG18       | TXNRD2   |
| MIR552       | ABCB10   |
| RAB18        | ACSM5    |
| ENTPD7       | ATE1     |
| GTSE1        | ATP13A3  |
| SETD3        | EBPL     |
| CCNY         | FPR2     |
| ATP6V1C1     | GAPDHS   |
| TNKS         | HTATSF1  |
| RBM3         | MRPL45   |
| NUP62        | MS4A1    |
| RNF181       | P2RY14   |
| LAMP3        | PARP3    |
| CAPN1        | PIGP     |
| CLEC12A      | POLE3    |
| CDC34        | RAI2     |
| EVI5         | RP2      |
| LRPAP1       | SF3B3    |
| SORBS3       | SLC17A8  |
| RAB10        | SNRPD3   |
| USP39        | SPOCK2   |
| NKD2         | TM7SF3   |
| RAB7A        | UBE2G2   |
| SLC6A3       | AVPI1    |
| IFIT1        | BCKDHB   |
| EBI3         | DUSP16   |
| CEP57        | FXD2     |
| BRD1         | OASL     |
| CNBP         | PRSS12   |
| COPS6        | SYVN1    |
| PROCR        | TIMM17A  |
| TFCP2L1      | CFTR     |
| SRXN1        | MARCKSL1 |
| MIR1236      | PRKD1    |
| CCN5         | PSMA3    |
| TNFAIP8L1    | TBC1D4   |
| ANP32B       | TCN2     |
| NRSN2        | TRPM4    |
| TGIF2        | APOOL    |
| CALM2        | CYP2D9   |
| CALML3       | FRRS1    |
| INTS3        | MED27    |
| PPA1         | MRPL22   |
| MARK4        | NUP133   |
| UQCRH        | PHF8     |
| PDZD7        | RUFY1    |

|              |         |
|--------------|---------|
| MTHFD2       | SLAMF9  |
| DUSP13       | TAF5    |
| PDIA4        | TEX261  |
| PRSS23       | BMPR2   |
| BTBD3        | CRELD2  |
| H1-2         | F11R    |
| SAGE1        | LTA     |
| MIR942       | VEGFD   |
| KHDRBS3      | APOBEC1 |
| H2BC15       | ART3    |
| SYNCRIP      | DEXI    |
| FADS1        | IRF4    |
| CSAD         | KCNA2   |
| MATR3        | MPP6    |
| TIGIT        | NEO1    |
| ERAP2        | NIPAL2  |
| CDC42BPA     | NUP155  |
| DYSF         | OPA1    |
| IDE          | PHKB    |
| USP21        | SCRN1   |
| MIR634       | WNT3    |
| RBM8A        | CHRNA4  |
| FBXW8        | CXCR2   |
| TRIM52       | MEF2C   |
| SELENOM      | MIR17   |
| MIR298       | SDR9C7  |
| MIR23C       | TATDN2  |
| CORO6        | CDCA7L  |
| SENP1        | CREB3L3 |
| SARDH        | FXR1    |
| SEC62        | GCKR    |
| MYDGF        | INTS6   |
| UBE2V2       | MMP15   |
| AGA          | PGM2L1  |
| LOC109113863 | PPIB    |
| MASP1        | RBM24   |
| OVOL2        | STXBP6  |
| FUCA2        | USP15   |
| PRKCH        | GAD1    |
| TOLLIP       | H4C12   |
| CAPRIN1      | LRTM1   |
| NEK6         | CDK7    |
| DAD1         | DCBLD2  |
| CITED2       | EHMT2   |
| MKNK1        | FAM111A |
| SCARA3       | HIVEP1  |
| CYP27A1      | AIMP2   |
| UMOD         | CCDC50  |
| OTUB1        | CDK16   |
| HGS          | ERBIN   |
| SORBS2       | FRYL    |
| DOK1         | GLOD4   |
| TUBA8        | GMPR2   |
| PHF6         | GOLPH3  |
| WSB1         | MARK2   |
| ACTR1B       | MGAT5   |
| PPM1F        | NELFA   |
| RAB17        | RANBP2  |

|              |           |
|--------------|-----------|
| BASP1        | RHOBTB2   |
| HRC          | RIOK2     |
| ARHGAP18     | SUSD4     |
| SH2D4A       | TUB       |
| VASN         | ZFP91     |
| RPL36A       | SMC1A     |
| ZNF689       | SRSF5     |
| SOGA1        | ASB2      |
| PTTG3P       | BOP1      |
| MCM3AP-AS1   | CYP20A1   |
| MIR1180      | DCAF11    |
| MIR487A      | DNAJB5    |
| C1QTNF1-AS1  | EZH1      |
| MIR105-1     | GGCT      |
| MIR5692A2    | HECTD1    |
| MRPS11       | MAPK4     |
| CUL4B        | NMI       |
| MGA          | NOVA1     |
| PLCD4        | RPS11     |
| LOC110386951 | TMEM106C  |
| CCNDBP1      | ZMYM2     |
| ORM1         | CARM1     |
| TRIP12       | CES1G     |
| PRR5         | CRYZL1    |
| TEC          | DYNLT1    |
| DGCR8        | E2F6      |
| SHKBP1       | FBXL3     |
| NOMO1        | HSD3B6    |
| NOMO3        | MAN1A     |
| INPP5D       | MRPL47    |
| BLMH         | POLR1F    |
| NUCKS1       | PWP2      |
| UVRAG        | RPP40     |
| BUB3         | RPS6KC1   |
| RPL24        | SERPINA11 |
| ZNF207       | TNIP2     |
| SULT2B1      | TSPAN14   |
| CDC16        | ZFP62     |
| MEFV         | ACAD11    |
| GPX7         | ADGRG2    |
| PSMD5        | COX6B1    |
| LOC108961161 | GALNT3    |
| RAP2B        | KANK4     |
| FABP2        | KLF7      |
| CIITA        | MPG       |
| H2BC13       | OGFRL1    |
| NEK8         | RAB32     |
| BRF1         | RNASEH2A  |
| MBP          | RPS8      |
| MSRB3        | WNK1      |
| MAS1         | AKAP13    |
| CSNK1E       | CYB5B     |
| GCSH         | PLCE1     |
| GPC5         | SH3KBP1   |
| RPL11        | SLCO4A1   |
| TRIM59       | VMP1      |
| FBP2         | CS        |
| TYRO3        | AP3M2     |

|                 |            |
|-----------------|------------|
| DNAH2           | ATP5PO     |
| IL1RL1          | CDADC1     |
| INTS6P1         | CHP1       |
| MAPKAP1         | CLCN6      |
| NCKAP1          | CYP2C      |
| GHSR            | EPB41L4A   |
| HSPA12A         | GPAT4      |
| ACE2            | GSAP       |
| ULBP1           | MAP4K5     |
| ADH5            | MFNG       |
| EIF3L           | NIBAN2     |
| CDSN            | NKX2-1     |
| TEFM            | P3H3       |
| NAB1            | PDCD10     |
| SAMM50          | PIP5K1B    |
| VEPH1           | RNF138     |
| OSMR-AS1        | TMEM14C    |
| LINC01265       | BACH1      |
| MIR3166         | FOXS1      |
| HLA-DPA2        | RAB4B      |
| LOC102723899    | TRMT2A     |
| ENSG00000255471 | AK3        |
| RNU6-959P       | RDX        |
| RNU6-828P       | YARS1      |
| ENSG00000223969 | C3AR1      |
| ENSG00000173867 | COBLL1     |
| ENSG00000249631 | COL17A1    |
| RN7SL731P       | FAR1       |
| ENSG00000235292 | FEZ2       |
| LOC107985896    | LHFPL2     |
| RNU6-37P        | OAS3       |
| ENSG00000250131 | PGM5       |
| LOC100420680    | RPRM       |
| RPS20P10        | SH3D19     |
| ENSG00000248262 | ST6GALNAC2 |
| RF00026-601     | TAF9B      |
| RF00017-6427    | TMC5       |
| ENSG00000285588 | TRERF1     |
| lnc-RNF39-5     | TSPAN33    |
| lnc-RNF39-8     | EFHD1      |
| RF00017-4589    | POLE       |
| piR-48222-068   | COL4A6     |
| lnc-FOXN3-6     | DAO        |
| NONHSAG009279.2 | DNAJA2     |
| lnc-PGD-4       | PPP1R14B   |
| ENSG00000280339 | ZMIZ1      |
| lnc-TDP1-2      | APOL3      |
| lnc-CCNL1-7     | FTSJ3      |
| piR-41141-006   | PITRM1     |
| HSALNG0015894   | PLCL1      |
| piR-56759-534   | SNX1       |
| piR-61240-151   | ANK        |
| piR-38351-255   | ANKRD37    |
| LOC107984428    | DPYSL3     |
| lnc-BRD2-5      | PRDM1      |
| RF00017-4590    | RARG       |
| lnc-FOXN3-7     | RIOK3      |
| piR-58308-062   | TNIP1      |

|                 |         |
|-----------------|---------|
| piR-37045       | TTN     |
| piR-36588-346   | AGFG1   |
| NONHSAG046509.2 | AMOT    |
| Inc-PNPLA5-2    | CARMIL1 |
| RF00017-054     | CDC37   |
| LOC105376725    | CNMD    |
| SEPTIN7         | CUTC    |
| MPZL2           | EML1    |
| KARS1           | ETFRF1  |
| EPHA8           | HLX     |
| SENP3           | KLHL7   |
| LOXL1           | LCORL   |
| NOP53           | LDB2    |
| MPZL1           | MYEF2   |
| ORAI1           | PDCD2   |
| EGR3            | PLEKHH1 |
| VDAC3           | PMS2    |
| PBX3            | RND2    |
| POLG2           | RSRC1   |
| EIF4A2          | SLC8B1  |
| CHD3            | TBC1D31 |
| UBE2J2          | TCEA1   |
| HERC4           | TULP4   |
| PPAT            | ANK1    |
| SNRPG           | CALML4  |
| ARHGAP42        | CSNK1E  |
| SLC2A4RG        | FARP1   |
| TMEM99          | GALNT1  |
| LRCOL1          | GNG7    |
| PROX1-AS1       | GPSM2   |
| LINC02484       | HPN     |
| LOC101928858    | IL2RG   |
| MIR519A1        | KCNB1   |
| WLS             | NDUFV2  |
| MAZ             | PDE1A   |
| HSD11B1         | PLEKHB1 |
| PSMC6           | THBS4   |
| TNIK            | TMEM158 |
| POTEE           | CAV3    |
| SSBP3           | DDHD1   |
| ARRB2           | EMILIN2 |
| HRH3            | EXOSC5  |
| RPGRIP1L        | RPIA    |
| UQCRC2          | SCN3B   |
| TSPAN4          | SNTB1   |
| CYP2R1          | SSB     |
| TUBA4A          | TSC22D2 |
| PPBP            | VEPH1   |
| ATXN7           | IL2RA   |
| H2BC5           | MAPK10  |
| H2BC17          | ERCC6   |
| FMR1            | PGM1    |
| CASP4           | ACOT5   |
| EPB41           | LRRC47  |
| PPIB            | STX4    |
| DENND2D         | TMEM11  |
| COPA            | VBP1    |
| MIR1247         | AFF4    |

|              |         |
|--------------|---------|
| ERAP1        | POLA2   |
| CYYR1        | ST14    |
| ARAP1        | VSNL1   |
| ICOS         | LAMB1   |
| CYTH3        | RETN    |
| SLC25A6      | ARL6IP5 |
| OPRD1        | COQ10B  |
| PRPF3        | CSNK2A2 |
| MT-TS1       | EPB41L5 |
| CYB5R3       | NPR2    |
| TMEM98       | PDP1    |
| RASAL1       | TET2    |
| ID3          | UAP1    |
| HAT1         | SLC12A2 |
| DDX6         | ABCB7   |
| AZU1         | COQ10A  |
| EIF3E        | DNAI1   |
| NR2E3        | EFR3B   |
| TNFSF12      | ENTPD3  |
| HOOK1        | KIFC2   |
| CIAPIN1      | KRT6A   |
| CDC123       | MNAT1   |
| SEPTIN11     | NAP1L4  |
| CD3D         | NEDD1   |
| PAQR3        | NGLY1   |
| TSN          | NUBP1   |
| CAVIN1       | PNMA2   |
| UGT1A10      | SCYL1   |
| MT4          | SLC66A1 |
| PCLO         | SURF6   |
| ASPM         | ACP3    |
| UBA52        | AP1B1   |
| TFDP2        | CHCHD6  |
| KNL1         | DCUN1D4 |
| ZMYM2        | DPP3    |
| ARL5A        | FRMD4B  |
| C19orf48     | GYPC    |
| BCAP31       | MASP2   |
| GALNT10      | MLF1    |
| TK2          | PLOD1   |
| MIR18B       | RGS19   |
| UNC5B        | RNF19A  |
| LPIN1        | TTC39A  |
| ACVR1C       | APPBP2  |
| FBXO8        | ATRNL1  |
| BDKRB2       | GAK     |
| INA          | KIFAP3  |
| RPS6KA2      | MYH2    |
| UHRF2        | OS9     |
| TRPV2        | OSTC    |
| DDX17        | PLA2G1B |
| LOC110467515 | RAB11B  |
| BBS2         | RAP2B   |
| PARVA        | RLIM    |
| LINC00328    | SGCB    |
| RPL3         | SNN     |
| CAP2         | SPEN    |
| USP16        | TMEM135 |

|           |         |
|-----------|---------|
| NAV3      | TRMT61A |
| SIRT4     | WDR3    |
| LMO4      | WWC2    |
| MAST4     | ALDH1A3 |
| TENT5C    | EPHA2   |
| RPL13AP20 | ARNT2   |
| DHRS4     | CACNA1A |
| CHMP4B    | MAPK11  |
| SRSF7     | PFKL    |
| PRKAB2    | SLC7A14 |
| PTCD1     | ZFP52   |
| NPY1R     | AOC3    |
| CDHR2     | ASF1A   |
| H2AZ1     | AUH     |
| CARM1     | FLCN    |
| VPS4A     | FOXP3   |
| MIR3619   | HGD     |
| SH3KBP1   | LDHD    |
| TRIP6     | NCAPD2  |
| CDK20     | PIM3    |
| CPT1A     | PPT1    |
| MYH14     | TFE3    |
| PGLYRP2   | ZFAND5  |
| APOC1P1   | NCOA3   |
| TMOD3     | ARAF    |
| TRIM3     | BMPR1A  |
| LY9       | DYRK1A  |
| CD3G      | GBP4    |
| AP2M1     | IKZF1   |
| VASP      | KCNE3   |
| CBLL1     | KIF3A   |
| MATN2     | MAP3K12 |
| NECTIN2   | MYH14   |
| IFNGR1    | PABPN1  |
| CDT1      | PBXIP1  |
| M6PR      | SLTM    |
| SNTA1     | STIL    |
| MSRA      | TECR    |
| RFC4      | UQCRB   |
| NAA11     | ADAM8   |
| NOLC1     | FLNC    |
| SRSF5     | FTCD    |
| PPL       | GAA     |
| PTCD3     | PRKAR2B |
| SLC28A1   | RARRES2 |
| CFI       | CHCHD1  |
| EEF1B2    | EMC8    |
| PSME1     | MBL1    |
| FHL1      | NRD1    |
| LRP10     | NSMCE2  |
| ZNF274    | TARS    |
| DELE1     | TEX9    |
| NFYA      | ACBD5   |
| NHEJ1     | ADH1C   |
| HOXD9     | ARMCX2  |
| MIR466    | CELSR1  |
| HNRNPR    | CEP85   |
| ZNF23     | LRP12   |

|         |          |
|---------|----------|
| SLC22A5 | NIT2     |
| SLC22A7 | NLRC5    |
| PBXIP1  | NNAT     |
| BIK     | PBX2     |
| CIDEC   | PJA2     |
| TMEM88  | SERINC1  |
| UBE2D2  | SLC22A15 |
| MIA3    | TRAK1    |
| PGAM5   | UPF1     |
| RASGRF1 | AGMO     |
| SLC7A2  | ANAPC11  |
| JARID2  | BICD2    |
| POU3F1  | CCL21    |
| MIR642A | CFDP1    |
| CDK11A  | KIF4     |
| BRCC3   | MRPS33   |
| GALNT2  | MTREX    |
| P2RY11  | NME6     |
| GSC     | STK24    |
| LAMB2   | VARs2    |
| NUP88   | FSHR     |
| ICMT    | TARDBP   |
| MIR3928 | ALDH8A1  |
| RAPGEF1 | ATP2A3   |
| PEPD    | CENPI    |
| CLVS1   | CNN2     |
| CFB     | CPNE8    |
| CUBN    | EFNB1    |
| EOMES   | GRK3     |
| CFAP20  | MOXD1    |
| H3C15   | PRDM16   |
| MAPK13  | RPL22    |
| NXF1    | SELENOW  |
| AP2B1   | SFTPb    |
| PTTG1IP | TNNC2    |
| SPINK6  | LIMCH1   |
| SCLY    | C4BPB    |
| FBXL15  | CBX3     |
| CA3     | CCDC86   |
| ATF7IP  | CCR3     |
| BVES    | CYP3A9   |
| RRAD    | DCAKD    |
| HSD17B2 | FNBP1L   |
| CDYL    | GMPPB    |
| GPATCH2 | HOXB9    |
| FCN2    | KTN1     |
| SLCO1A2 | NDUFA7   |
| SSX4    | NSG1     |
| MBD1    | P2RY6    |
| GTF2H2  | PLD3     |
| KIF3B   | PSME2    |
| GRAP2   | RPL14    |
| ATG16L1 | S100A1   |
| IFN1@   | SEPTIN11 |
| UGT1A4  | SLC25A15 |
| DUSP14  | TNFRSF14 |
| RTKN2   | UROD     |
| MIR770  | USP5     |

|          |          |
|----------|----------|
| RNASE4   | ARRB1    |
| TNFSF14  | HHEX     |
| HES5     | MYLIP    |
| TUBB4A   | ADORA1   |
| PHF2     | GH1      |
| PDK4     | LHCGR    |
| KIF23    | ACYP1    |
| MYL2     | AHCTF1   |
| COA5     | APMAP    |
| GNA13    | APPL1    |
| HMGB2    | ARHGEF19 |
| AFAP1L2  | CALN1    |
| DLX2     | DAGLB    |
| TAMALIN  | DGKH     |
| SHROOM3  | FAM3C    |
| ASH1L    | FCGR3A   |
| PSMD14   | FCMR     |
| CDKAL1   | FGFRL1   |
| GJC1     | IRF2BPL  |
| MAP4K2   | NLE1     |
| PSMC2    | P2RX5    |
| HLA-S    | PLEKHF2  |
| TNRC6A   | PPIL1    |
| A1CF     | RAB25    |
| IGHG1    | RRP9     |
| TM4SF5   | SLC25A24 |
| TFPT     | SNCB     |
| HMGCS2   | TRIM35   |
| IL17RB   | ATIC     |
| GORASP1  | DPP7     |
| PPM1B    | ERCC5    |
| ANOS1    | FLRT2    |
| CEP135   | GFPT2    |
| IPO4     | PPP1R9A  |
| IPO9     | RGL1     |
| UBE2N    | SLC3A1   |
| KDM4B    | STBD1    |
| HAPLN1   | MYH7     |
| ACTN3    | ANKS4B   |
| HIVEP2   | CCN3     |
| DDX47    | EIF1A    |
| PARP12   | GBA2     |
| SAMSN1   | IPMK     |
| PUSL1    | KRT79    |
| IL34     | LRMP     |
| FAM160B2 | MFSD1    |
| ATPAF2   | NEFL     |
| OIP5     | NUDT6    |
| CREM     | ORMDL2   |
| MAOB     | OSBPL10  |
| TBXAS1   | OSBPL7   |
| CDK11B   | RTN2     |
| CABIN1   | TMEM63A  |
| KDM8     | UGT3A1   |
| RFC3     | UNC5CL   |
| GIPR     | ZBTB7A   |
| SLC7A11  | CCDC120  |
| MIR645   | MTERF3   |

|              |         |
|--------------|---------|
| TSPYL2       | QTRT2   |
| EIF1         | NPY     |
| MAD2L1BP     | ACIN1   |
| CIRBP        | ARPC2   |
| S100A16      | CEP57   |
| CNPY2        | CKLF    |
| CAVIN2       | CREB3L2 |
| MIR758       | HSD3B7  |
| YRDC         | MMUT    |
| SERPINA11    | MN1     |
| CALU         | PLBD1   |
| SETD1A       | PLCD1   |
| LG MN        | RPL9    |
| FUT5         | TMCC1   |
| H2BC3        | ABLIM3  |
| PYM1         | ADARB1  |
| ULK2         | ADCY9   |
| INTS4        | ARL6IP1 |
| TRIM16       | COX7C   |
| MIR153-1     | GAL     |
| PKD2         | LRP4    |
| GMPR2        | LURAP1L |
| LIPA         | MYO10   |
| LOC112081413 | NFE2L3  |
| IMPA1        | STRA6   |
| CLIC5        | YPEL2   |
| GNPDA1       | ZFHX4   |
| MAFF         | ITGB5   |
| DNAH5        | NSDHL   |
| SGSM3        | FGF9    |
| FMN1         | ASCC3   |
| GIPC2        | BCAP29  |
| SIGLEC10     | CDK2AP2 |
| UCKL1        | CEBPZ   |
| TRPC4AP      | CSNK1G1 |
| CBX6         | FCHSD2  |
| BTG4         | MARCHF6 |
| GOLGA3       | MFHAS1  |
| CDYL2        | PIF1    |
| SAFB2        | PRPF40A |
| KCNRG        | PXK     |
| THOC5        | RBBP7   |
| ZBTB12       | RDH5    |
| CEP131       | SRGAP3  |
| IER2         | SRPK1   |
| HSF2BP       | ZFYVE26 |
| SPATA9       | AP1G1   |
| UBAP2        | CCDC92  |
| LCTL         | COX7A1  |
| ZNF233       | DNM1    |
| ZNF26        | EEA1    |
| NXPE3        | EFEMP2  |
| YJEFN3       | INF2    |
| CCDC178      | LYPD1   |
| MAP11        | PASK    |
| ZNRD2        | PSMC1   |
| H2BC18       | RASSF2  |
| INSYN2B      | RPN2    |

|              |          |
|--------------|----------|
| LMCD1-AS1    | UPF3B    |
| TMEM92-AS1   | ARF5     |
| ID2-AS1      | ATG2B    |
| EPS15        | CDKL2    |
| AGXT         | CENPX    |
| LOC112679202 | CLTA     |
| DIAPH3       | CPED1    |
| TXLNA        | DUSP13   |
| CKM          | EIF3F    |
| SPDYA        | ESRP2    |
| IKZF1        | FBXL7    |
| OPRK1        | FES      |
| RPN1         | GTPBP1   |
| DDX46        | HSPBAP1  |
| MLN          | LUC7L2   |
| ZBTB17       | NUDT12   |
| DGKQ         | ONECUT2  |
| ARPP19       | PIGQ     |
| MIR1275      | PIP4P2   |
| MIR329-1     | POGLUT2  |
| TNFRSF4      | PPP1R13B |
| SMAD5        | RRN3     |
| MIR520F      | TBCEL    |
| MPP3         | TPRKB    |
| RNF111       | WIPF3    |
| EEF1D        | RXRB     |
| ACACB        | COL5A3   |
| SIVA1        | GFPT1    |
| NINJ1        | INHA     |
| IRF8         | MXD4     |
| FBXO7        | SLC39A4  |
| SLC7A1       | CDH3     |
| ZNF32        | ESCO2    |
| STRN         | CASKIN2  |
| IARS2        | CELA2A   |
| TNR          | CYP2C70  |
| OXCT1        | DAPL1    |
| PFKL         | DCAF5    |
| FOXO6        | DCLK3    |
| ZFYVE9       | GGA3     |
| RRBP1        | LONRF2   |
| PLAA         | MAK16    |
| PMPCA        | PTPN23   |
| MEIS2        | RNASEH1  |
| SERPINE2     | RRP1     |
| NEDD4L       | APOL7A   |
| KIR2DS2      | CD8B1    |
| ST3GAL5      | LTB4DH   |
| C7           | RBM13    |
| NEIL3        | REN1     |
| ZHX1         | CANX     |
| MIR610       | ACSM2    |
| DBI          | ADPGK    |
| GIT2         | AKR1C6   |
| TRIO         | CACNA2D2 |
| TXN2         | CES1E    |
| DNAJA1       | CLEC4F   |
| GRAP         | CNKSR3   |

|              |          |
|--------------|----------|
| CDC14B       | HIGD2A   |
| NLRX1        | IL12RB1  |
| TLN2         | KLHL4    |
| XPOT         | LCP2     |
| DLG5         | LRP10    |
| SLU7         | ME2      |
| UNC5C        | MORF4L2  |
| C1QBP        | NIP7     |
| ITPR1        | PIAS3    |
| H3C14        | PRPSAP1  |
| CIAO2A       | PRR13    |
| SLC1A2       | SCAMP5   |
| MAVS         | SEPHS1   |
| CABYR        | SPI1     |
| JTB          | UBAP2L   |
| SNORA24      | UBE2J2   |
| MIR761       | DLG4     |
| FSTL3        | CNR1     |
| RAB21        | ACSM3    |
| HSD17B10     | CASP8AP2 |
| SRPX2        | CGNL1    |
| GALNT4       | IRX3     |
| CKAP2        | KRT13    |
| CHAF1B       | LTC4S    |
| MXD1         | MGAT2    |
| NDUFA9       | NUMA1    |
| SGK2         | PPP1R14A |
| KPNA1        | PSMD8    |
| PSMD3        | SLC7A6   |
| TIAM2        | SMAD9    |
| DRAM1        | TBC1D1   |
| H2BC12       | TNNT1    |
| MIR520E      | TNNT2    |
| UBTF         | CD200    |
| ZNF667       | NEU1     |
| COP1         | PSMC6    |
| PAFAH1B1     | SLC25A1  |
| TARDBP       | TFAP2C   |
| NAE1         | ABCG4    |
| MIR208A      | ARL15    |
| MIR604       | CDC5L    |
| MIR593       | CILP     |
| RBPM5        | CLIC6    |
| DGAT2        | CMTM7    |
| PPP1R8       | CTNNBIP1 |
| OSBPL1A      | CYFIP1   |
| LOC111216273 | DEF6     |
| FLAD1        | FKBP7    |
| USP5         | GDF11    |
| SLC25A3      | HYKK     |
| DGKA         | LCMT1    |
| ITPKA        | OBP3     |
| RCN2         | OPN3     |
| SSTR5-AS1    | PAFAH1B2 |
| SSR3         | REEP4    |
| FBXL5        | SEC61G   |
| DCAF13       | SLC25A51 |
| SSX4B        | SNTA1    |

|              |          |
|--------------|----------|
| SSX7         | STX8     |
| TRIB1        | TTC27    |
| RASA2        | UBE2A    |
| PRKRA        | CSNK2A1  |
| TARBP1       | FOLR1    |
| F11R         | PPP1R12A |
| NR2F1        | PTGER3   |
| CAST         | SHMT2    |
| C4A          | CLCN3    |
| TPP1         | GNB1     |
| RAB34        | H2AC6    |
| LOC110599567 | NR2F1    |
| NDUFA10      | AFF1     |
| PARP2        | CLDN14   |
| LITAF        | CLP1     |
| UTRN         | COPE     |
| ATP1A3       | CREBZF   |
| DHCR7        | DUSP9    |
| EYA1         | IPO7     |
| HTR1D        | PCDH1    |
| RPS10        | PSMD2    |
| PAPSS1       | RAB11A   |
| DYNC1I1      | RNASEH2B |
| ATAD3A       | SH3BP2   |
| BTLA         | SRRT     |
| CKMT1B       | TLK2     |
| HMCN1        | CD93     |
| CCAR1        | DICER1   |
| EPB41L5      | FOXP2    |
| SPINK13      | RABGGTB  |
| MIR519C      | ADCY2    |
| MIR646       | ATXN3    |
| CD244        | BCOR     |
| TOMM34       | GTF2IRD1 |
| PDE4A        | HACD4    |
| NDUFA12      | LHX2     |
| TRIM32       | PPP2R1B  |
| INHBB        | PTPN13   |
| LILRB2       | RBM5     |
| GCLM         | RUVBL2   |
| CCL23        | SRR      |
| TMX3         | TIFA     |
| DSEL         | ZAP70    |
| NMI          | CCDC47   |
| CD209        | CEP135   |
| PDE4DIP      | COG8     |
| KCNN3        | CYP3A44  |
| TRAK1        | DUS2     |
| CTSZ         | HAUS6    |
| RNF20        | LAMTOR5  |
| MAP3K12      | MSI1     |
| PTPN2        | OXNAD1   |
| TMPO         | PACC1    |
| TP53AIP1     | SPATA2L  |
| MIR325       | CALM2    |
| ARHGAP9      | PDE2A    |
| XPO4         | UCP3     |
| GUCD1        | ARMC6    |

|              |          |
|--------------|----------|
| LSS          | MRPL53   |
| FBXW5        | TM4SF19  |
| CHD6         | TMEM9B   |
| PARP14       | USP20    |
| SPART        | ASB9     |
| DCX          | BLOC1S2  |
| GPAA1        | CCDC90B  |
| PRPF31       | CR1L     |
| FARSA        | DLL4     |
| MYH1         | FAM20A   |
| CMBL         | HAUS1    |
| RPP30        | HBS1L    |
| ACOT12       | HSPB9    |
| IGDCC4       | LMOD1    |
| ONECUT2      | MYO1F    |
| PASD1        | NUDT21   |
| ODR4         | POLE4    |
| SPINDOC      | RBM17    |
| LINC00461    | RCHY1    |
| MIR602       | SGTB     |
| PROC         | SLC5A9   |
| LINC01615    | TBCE     |
| DHRS2        | TMEM44   |
| GNAI3        | C2       |
| SRPRB        | KISS1    |
| DESI2        | PPBP     |
| SHCBP1       | RPL27A   |
| UTP14A       | UPB1     |
| UGT2B4       | ZDHHC2   |
| LNPEP        | AMOTL2   |
| CTAG1A       | CDCP1    |
| EIF4G2       | DNER     |
| NR2F6        | DSCC1    |
| VSIG4        | DSG2     |
| SPC24        | H2AZ2    |
| DARS2        | MTA1     |
| S1PR2        | PPP2R5C  |
| BDH1         | SLC12A7  |
| RPS26        | SOX11    |
| ACSM5        | ACBD4    |
| ANAPC13      | KDM5A    |
| ABHD3        | KLC1     |
| APOC4        | MOGS     |
| CDNF         | MRPL50   |
| GOLGA7       | MTFR1    |
| MS4A7        | MXRA8    |
| UBL5         | NADK2    |
| RAB24        | PPP2R5E  |
| SLC22A25     | RALGPS2  |
| MED8         | RASL11A  |
| C12orf66     | SELENOS  |
| CDADC1       | SGPL1    |
| CCDC158      | SLC2A6   |
| C2orf72      | SLC39A1  |
| CFAP221      | SP100    |
| C3P1         | SYTL4    |
| REELD1       | TMEM106A |
| LOC100288798 | DZIP1L   |

|              |          |
|--------------|----------|
| TCEAL3-AS1   | LTA4H    |
| LOC101927269 | AOC1     |
| PCCA-DT      | CD300LF  |
| LINC01595    | CDK20    |
| LINC01348    | CLEC4A3  |
| ACTBL2       | GNGT2    |
| C12orf43     | H2-EB1   |
| IDO2         | HEPH     |
| PLOD1        | MBOAT2   |
| LIN7A        | MDM4     |
| CASC3        | MRPL30   |
| HRG          | PARN     |
| SLC1A4       | SART3    |
| IL31         | SEC22A   |
| GINS3        | TMEM25   |
| SRCAP        | UCK1     |
| SYF2         | UCK2     |
| SERPING1     | UPK1A    |
| SNAP23       | USP4     |
| CPA6         | ANXA11   |
| TRIM22       | APBB2    |
| PSMD11       | C7       |
| ADCYAP1R1    | CELF1    |
| TUBB6        | EPS8L2   |
| UBE4A        | EXOSC2   |
| CHCHD2       | FGF10    |
| PRIM1        | GALNT10  |
| MALT1        | GPRC5C   |
| HDAC7        | OMD      |
| ITLN1        | PCYOX1   |
| PRPF4B       | PDP2     |
| SYTL1        | SEMA3E   |
| DPP3         | SLC22A12 |
| PEX2         | AGMAT    |
| IL10RA       | CENPP    |
| GPR37        | FBXO22   |
| CRY2         | GAPVD1   |
| SYVN1        | HERC1    |
| TPTEP1       | HMOX2    |
| MIR548L      | HOOK3    |
| GINS1        | KSR1     |
| LAPTM5       | MYRIP    |
| SUMF2        | PHF5A    |
| NAXE         | RAB5B    |
| IL26         | SDSL     |
| SLC30A8      | SIL1     |
| RFX6         | SLC37A2  |
| ARF6         | THSD7A   |
| MIR509-3     | TSPYL2   |
| ITGB7        | ZFP354A  |
| ACVR2B       | AEBP1    |
| AS3MT        | BCL2L13  |
| RPS3         | CAMTA1   |
| AIMP1        | CDH4     |
| CDK5R2       | CENPN    |
| CHST4        | CRKL     |
| RSU1         | CXCL6    |
| PRMT6        | DUOX2    |

|              |         |
|--------------|---------|
| PCBP4        | FNBP4   |
| TAB2         | GTF2B   |
| MEOX2        | KAT14   |
| H2BC1        | KCTD1   |
| LAS1L        | KIF5B   |
| ABT1         | LARP1   |
| LEFTY2       | LDLRAD4 |
| ROBO3        | MAS1    |
| PSMB2        | MDC1    |
| TRAF7        | MUC4    |
| HNRNPH3      | NEIL1   |
| KRT80        | NPHP4   |
| MAGEH1       | PRMT2   |
| LCT          | PWWP3A  |
| ADRA2C       | RAB4A   |
| LBP          | SLC16A4 |
| CYP3A43      | TANC1   |
| ATG14        | TCERG1  |
| ANXA8L1      | TMX1    |
| MARVELD1     | TRAFD1  |
| RPS19BP1     | TRIM27  |
| ADRM1        | TRIM6   |
| HOXD8        | ZFYVE16 |
| IL25         | TRH     |
| DIXDC1       | P2RX7   |
| MIR760       | PTGER4  |
| MIR1260B     | ANK2    |
| ANGPTL3      | BCL11A  |
| HERC1        | CEMIP   |
| C6           | DEFB1   |
| ACOT8        | HLF     |
| IRGM         | MLKL    |
| OSBPL11      | PDCD6IP |
| ACRBP        | PPM1B   |
| NABP2        | C2CD3   |
| LARP4        | CYP2C50 |
| LEPROT       | LRWD1   |
| SLC25A48     | NUDT13  |
| LOC111216272 | PARL    |
| CEP164       | PXN     |
| ATP5ME       | ACTN4   |
| XAB2         | ADGRV1  |
| MDH1         | ADORA3  |
| GALNT1       | EXT1    |
| HRNR         | F12     |
| TTC28        | GLIPR2  |
| GAD1         | MECOM   |
| NDUFB8       | PICALM  |
| SLIRP        | PSD3    |
| ZNF267       | STMN2   |
| NDUFB3       | CDH5    |
| SERPINB9     | BMP8B   |
| DSN1         | CAPN15  |
| PTPN18       | CDR2    |
| TASP1        | CHAC2   |
| BOP1         | COG3    |
| ISG20        | CUL1    |
| PTBP3        | CYP21A1 |

|              |          |
|--------------|----------|
| NT5C2        | DNAJC1   |
| JMJD6        | HPS5     |
| FOXL1        | INPP5A   |
| MIR3662      | KLF1     |
| PDHB         | MAX      |
| CPXM2        | MIDN     |
| CILK1        | MORC4    |
| TCN2         | MYL4     |
| KIR3DL3      | NIT1     |
| KCTD10       | NRBF2    |
| MIR4458      | PRKX     |
| ENPP7P13     | RAB23    |
| TBX21        | RABEP2   |
| ACAD9        | RBM8A    |
| C12orf65     | RNMT     |
| COA6         | RTEL1    |
| ENO3         | SBNO1    |
| AQP7         | SPIB     |
| RPL35A       | ST8SIA3  |
| USP11        | TAB3     |
| FBXW2        | TAF5L    |
| THADA        | TM9SF2   |
| GLRX3        | TMEM150A |
| ETFB         | VRK1     |
| LOC110806306 | AP3M1    |
| AGPS         | C5AR1    |
| RPS6KA5      | CABIN1   |
| IL18BP       | CDC42EP5 |
| H6PD         | CKMT1    |
| APOA2        | CNTFR    |
| DYRK2        | CORIN    |
| SMPD2        | FDX1     |
| MGP          | FUCA2    |
| SSX2IP       | GALT     |
| AK3          | HGS      |
| CLN3         | HIF1AN   |
| GLCE         | HNRNPC   |
| B3GNT2       | ITGA9    |
| DNAJB11      | MAGI3    |
| KANK2        | NAT8L    |
| PLXDC1       | NDUFB4   |
| SUPT6H       | OAS1A    |
| ERGIC3       | PCNT     |
| KANK3        | PTRH2    |
| PATJ         | RASSF6   |
| LSINCT5      | RSF1     |
| DPYSL3       | SERPINI1 |
| AGBL2        | SLC38A1  |
| MZB1         | SPP2     |
| CCDC85B      | SUGP2    |
| TMEM234      | TBC1D9   |
| EGFL6        | TDRD3    |
| LOC111255642 | TLE5     |
| FGG          | TTC23    |
| MAP3K21      | WDR47    |
| SEMA3B-AS1   | ZDHHC14  |
| SUCLG1       | GDNF     |
| MRPS22       | CTSG     |

|             |            |
|-------------|------------|
| NEUROG3     | RDH9       |
| COQ8A       | ABCB6      |
| SPARCL1     | GNAI1      |
| KMT2A       | SLC39A10   |
| KIF13A      | AADAC      |
| BMPR1B      | AKT1S1     |
| GNB1        | CBX4       |
| SLC2A9      | CLIP4      |
| SGPL1       | DAPK3      |
| PROK2       | HPGDS      |
| MED23       | MND1       |
| CSRP1       | NME4       |
| LAIR1       | NRXN3      |
| NCAPH       | NTN4       |
| TNPO1       | PMS1       |
| DLX6        | RPL18      |
| LMO3        | SLC25A23   |
| DDX24       | ZCCHC7     |
| POF1B       | ZFR        |
| MLF2        | ADH5       |
| RAD51AP1    | DAG1       |
| LUZP1       | ITGA2B     |
| VPS13D      | PLIN3      |
| ZG16        | SYNM       |
| DYNC2I2     | AP2B1      |
| H2BC11      | COX2       |
| MIR3194     | CSGALNACT1 |
| RAET1G      | ELMO1      |
| GFI1        | FA2H       |
| GABRB3      | HOXA5      |
| LHX3        | ITPK1      |
| MARCO       | KIF1B      |
| RNF41       | LARP7      |
| AQP4        | PAK3       |
| LUM         | PLCD4      |
| NPEPPS      | RPL36A     |
| NOM1        | RPN1       |
| DIS3L2      | RRAGC      |
| GEM         | SIDT2      |
| GLIPR2      | SKP1       |
| CCDC40      | TERF1      |
| TMPRSS13    | USP1       |
| EAF2        | HSP110     |
| TXNDC9      | TEGT       |
| CROCC       | CTDP1      |
| C1orf43     | GTF2F2     |
| GPR78       | KLHL25     |
| TMUB1       | MOB3A      |
| GLYATL2     | PIGT       |
| FAM9C       | SCAMP4     |
| LINC01287   | SGSM1      |
| PHACTR2-AS1 | SPRR2A     |
| LINC01374   | TRABD      |
| MIR2392     | WDR81      |
| MIR892A     | ZNRF2      |
| UC.134      | UGT1A7     |
| LDB1        | ACYP2      |
| ARNTL       | AGA        |

|              |            |
|--------------|------------|
| ATP5F1E      | ARMC9      |
| DDX20        | BAG6       |
| MRPL44       | BCL7A      |
| NENF         | CACHD1     |
| ANXA11       | CD2BP2     |
| NELFB        | CDK5RAP3   |
| UTP4         | DNTTIP2    |
| CCL28        | ESAM       |
| SPTAN1       | FAM110B    |
| FBN2         | GAL3ST1    |
| KCNH2        | HIPK1      |
| GCN1         | HPS1       |
| EFNA4        | HYI        |
| HTR2B        | JPH3       |
| EIF2S3       | MRPL38     |
| GABARAPL1    | NOD1       |
| NCAN         | NUDT5      |
| SLC38A2      | PCMTD2     |
| ARHGEF19     | QSER1      |
| NOSTRIN      | RT1-S3     |
| CCDC8        | SAMM50     |
| YTHDF1       | SEMA5B     |
| ZIC5         | STX12      |
| GIN54        | TBRG4      |
| FSIP1        | TMX4       |
| PARPBP       | TSPAN1     |
| CCNJ         | UGGT2      |
| RNF187       | AAMP       |
| H2BC9        | ADCK2      |
| PLPPR5       | ARHGAP25   |
| LINC00467    | CNOT1      |
| MIR520G      | ERH        |
| MIR575       | MPPE1      |
| MIR877       | MRPL16     |
| MIR922       | PRPF18     |
| MIR769       | PUM1       |
| MIR920       | ST6GALNAC3 |
| RAD51-AS1    | STXBP5     |
| MIR329-2     | TMEM41B    |
| MIR194-2HG   | ZYG11B     |
| MIR924       | ARAP2      |
| MIR4443      | DDX39B     |
| MIR4782      | FANCG      |
| MIR4262      | HNRNPL     |
| LOC106014249 | MAG        |
| POLA1        | MUC2       |
| NDUFS3       | TUFM       |
| INSIG2       | KCNK1      |
| FLII         | APOL9B     |
| PCSK7        | ACBD3      |
| LOC106096416 | BDKRB2     |
| CYC1         | CAMP       |
| HEXA         | FBXO3      |
| AASS         | IGTP       |
| ART3         | KDM7A      |
| TNIP2        | MKNK1      |
| LIN9         | NDUFA3     |
| FOXJ1        | PAIP1      |

|              |           |
|--------------|-----------|
| SERPINB12    | PARM1     |
| RTP3         | PGP       |
| RASSF7       | POLI      |
| ARL4C        | PTBP3     |
| PPT1         | RNF103    |
| DUSP28       | ST3GAL3   |
| NFE2L1       | YES1      |
| KCNJ3        | PNN       |
| ADRB1        | REST      |
| CNTNAP2      | TRIM59    |
| LOC111365141 | CDC7      |
| GGA3         | CX3CR1    |
| B4GALNT1     | FBXO34    |
| AMPD2        | KDM3A     |
| GRHPR        | MAL2      |
| OPA1         | PLN       |
| OLR1         | SPRR2D    |
| DDAH1        | ATG10     |
| CYB5B        | BOC       |
| IL21R        | CCNO      |
| GSTK1        | CD2AP     |
| HLX          | CIAPIN1   |
| BZW2         | DDX56     |
| STK26        | DPAGT1    |
| P3H1         | IFI16     |
| BYSL         | IK        |
| PLXNA3       | LACC1     |
| TMX1         | MAP4K2    |
| TXNDC12      | PDRG1     |
| ABHD10       | PRRX2     |
| MYO18A       | PYROXD2   |
| PROKR1       | RGS7      |
| IL9R         | RHOD      |
| STX2         | RRP1B     |
| ZC3HAV1      | SERPINA3M |
| ARHGAP44     | STRN3     |
| MICALL2      | TMEM123   |
| DUOXA1       | ZDHHC21   |
| SYPL1        | ZPR1      |
| KIF27        | SLC7A1    |
| COA7         | ARHGEF5   |
| SGTB         | CCDC3     |
| SPIDR        | CDIP1     |
| MIR374B      | CYP4A8    |
| MIR601       | DMD       |
| KTN1-AS1     | EYA3      |
| MIR767       | FBXO8     |
| MIR522       | FECH      |
| MIR4516      | GRID1     |
| MIR591       | MIR30E    |
| LOC117204001 | POLR3B    |
| ACADS        | PRELID2   |
| SLC5A3       | RTCA      |
| PEX6         | RUNDC3A   |
| G6PC2        | SMYD5     |
| DDRGK1       | SNIP1     |
| MRPL28       | SPIRE2    |
| ENPP1        | STX17     |

|              |          |
|--------------|----------|
| BBS9         | UNC119   |
| PRPF40A      | WAS      |
| INHBC        | ANKRD13B |
| ADK          | APBA3    |
| PLOD3        | EXTL3    |
| ERVMER34-1   | FBF1     |
| NPPB         | NVL      |
| POLL         | ARIH1    |
| CAPN10       | ATG3     |
| NPTX2        | B3GNT5   |
| NDUFV2       | CENPH    |
| NDUFA4       | CYTIP    |
| COQ9         | EPHB6    |
| TRIP10       | F11      |
| RANBP1       | FIGN     |
| LHX6         | GAS2L3   |
| LOC105274310 | HACD3    |
| C1QA         | MFAP5    |
| RPS14        | MPZ      |
| IL3RA        | NAB1     |
| EXOSC4       | NME3     |
| AMPD1        | PLLP     |
| CIT          | SOWAHC   |
| GMDS         | SRD5A3   |
| BAAT         | TSPAN12  |
| CNDP1        | YRDC     |
| CLDN14       | MAP3K7   |
| DGKG         | ARHGAP29 |
| KMO          | ATP6V1B2 |
| RHOT1        | CUL3     |
| CRY1         | FARSB    |
| NR2E1        | GTF2I    |
| SPTA1        | HSPB6    |
| PSMD7        | PNPLA8   |
| RAPGEF4      | SEL1L    |
| ARHGAP4      | SLC39A6  |
| MGAT4B       | UBE2B    |
| HPCAL1       | VAMP2    |
| RFX5         | ZC3H12A  |
| CYTH2        | ABHD11   |
| NCS1         | ART4     |
| PEMT         | DNA2     |
| PSMD12       | ECHDC3   |
| KCNE2        | GP1BB    |
| PSMB3        | HERC3    |
| B3GALNT2     | KLHL2    |
| RPL30        | MIR29C   |
| SCD5         | MLLT10   |
| SLC35C1      | MPC2     |
| SLAMF6       | NKD2     |
| TPPP         | RCAN3    |
| RAB31        | RUFY2    |
| STXBP3       | SEC11C   |
| FXYD6        | SEC24B   |
| ART4         | SH3BGRL2 |
| CRLS1        | SLC35D2  |
| CD48         | SLMAP    |
| CHST12       | VASH1    |

|          |          |
|----------|----------|
| CFHR3    | VOPP1    |
| DNER     | ZDHHC13  |
| IGSF3    | ANO2     |
| PPP1R12B | IDO1     |
| RPL36    | NFATC2   |
| OPN3     | TP73     |
| TPTE     | ACVR1    |
| STAB2    | BAZ2B    |
| TUFT1    | BLVRA    |
| LMCD1    | CHD7     |
| BMS1     | FAM126B  |
| SH3RF1   | HTRA3    |
| NFE2L3   | LUC7L    |
| TOR1B    | NRN1     |
| TOB2     | PCBP2    |
| UGT2B28  | PIK3AP1  |
| UNC5A    | PTPN14   |
| ZNF24    | SAMD9    |
| VAT1     | THOC2    |
| AKR7A3   | WASL     |
| GABRQ    | ZMYM3    |
| APOBEC3F | GAS2     |
| FAM83H   | HSPG2    |
| BUD31    | RAB20    |
| GUF1     | SERPINB8 |
| COG6     | TCF3     |
| EHD3     | TIAM1    |
| PEF1     | TUFT1    |
| OXGR1    | ARPC5    |
| SCPEP1   | ARSJ     |
| TRIM55   | ATP6V1F  |
| PTPMT1   | BTAF1    |
| NCAPG2   | CUL4B    |
| GSPT2    | DYM      |
| SF3A3    | GOLGB1   |
| PBLD     | HDAC11   |
| KHDRBS2  | HMBOX1   |
| MANEA    | KLC4     |
| LRRC1    | LRRC58   |
| CMTM6    | MAP4K3   |
| CHST13   | MRPL9    |
| IGSF11   | NAPA     |
| TONSL    | NUDT19   |
| KIZ      | PDE1B    |
| TMEM9    | PKN1     |
| PRDM8    | PRR16    |
| DNAH17   | RASL12   |
| FKBP11   | SAMD8    |
| ADAM21   | SUFU     |
| DNAH10   | TERF2    |
| CCDC47   | WDR19    |
| GPR155   | NPHS1    |
| DBX2     | SLC4A1   |
| SARS1    | ARL6     |
| SPRYD4   | DENN2B   |
| TMED3    | FAM47E   |
| PCDH11X  | GCN1     |
| WWC2     | SPICE1   |

|           |         |
|-----------|---------|
| F8A1      | TMIE    |
| ANP32E    | ZW10    |
| EPPK1     | CHI3L1  |
| CDKN2AIP  | ALG2    |
| DENND5B   | BCCIP   |
| CEP85     | CERS6   |
| SPAG7     | DAPP1   |
| RRS1      | FASTK   |
| NLRC3     | HDDC3   |
| UBQLN3    | HECA    |
| TRMT6     | IPO9    |
| SYAP1     | ITM2C   |
| KLHL21    | NDUFA8  |
| CMTM2     | NUBPL   |
| CMYA5     | POLR1C  |
| DNAJC14   | PPIG    |
| RSBN1L    | RFWD3   |
| SLC44A5   | SIRT5   |
| TRIM60    | SLC17A2 |
| TRIM7     | SLC39A5 |
| SVOP      | STK38L  |
| TMEM100   | TFF2    |
| IFI44L    | TIMM23  |
| KRT26     | TMEM144 |
| VNN3      | TMEM64  |
| CCDC174   | WFDC1   |
| FBXO34    | FBLIM1  |
| FBXO36    | KIF5C   |
| CLDN17    | MICAL2  |
| EFCAB2    | PDE3B   |
| ICE2      | PHLDB2  |
| SAC3D1    | PNISR   |
| L3MBTL4   | PON3    |
| KRI1      | TBK1    |
| ZNF479    | TENT5A  |
| RMDN1     | TRPV6   |
| DUSP21    | UBB     |
| PRMT9     | WDR1    |
| ZC3H12B   | ABHD3   |
| ZNF717    | CHD3    |
| DTHD1     | DLST    |
| SH3D21    | INPP1   |
| FAM43B    | LRPAP1  |
| SVBP      | MSI2    |
| MFSD4A    | MTCH2   |
| PCDH11Y   | NPHS2   |
| BBOF1     | SEMA6A  |
| RMC1      | SLC43A2 |
| GRAMD2A   | TMEFF2  |
| OR2T29    | TMEM171 |
| OR2T5     | TOR1A   |
| MIR1224   | CYP3A5  |
| MIR1306   | COL11A1 |
| HOXA-AS3  | PAX6    |
| LINC00161 | PSEN1   |
| MIR1296   | PRKN    |
| MIR663B   | NFIC    |
| MIR636    | ABCA7   |

|              |          |
|--------------|----------|
| EIF2S3B      | AKR1B3   |
| LINCMD1      | ATF6B    |
| MIR3117      | DCAF13   |
| FAM99B       | FIG4     |
| MIR632       | FRAT1    |
| DUX4L1       | GOLGA8A  |
| LINC00462    | HINT2    |
| LINC00488    | HOXB6    |
| LINC00707    | IL18RAP  |
| MIR1231      | IL3RA    |
| FLVCR1-DT    | KLHDC2   |
| EEF1A1P5     | LTV1     |
| MIR3178      | METTL5   |
| MIR512-2     | MUC13    |
| MIR513C      | MYL12B   |
| LINC01080    | OSBPL11  |
| MIR1181      | PGAM5    |
| MIR376A2     | POLR2G   |
| MIR3126      | POLR2H   |
| SNORD76      | POMP     |
| SNORD113-1   | PQLC3    |
| LINC00682    | SCAND1   |
| MIR1199      | SYMPK    |
| MIR3131      | TMCO1    |
| MIR764       | TRIM11   |
| LINC01391    | TSPAN17  |
| MIR1268A     | SLC9A1   |
| MIR5581      | HIBADH   |
| MIR3910-1    | PDIA5    |
| RB1-DT       | UBQLN1   |
| EIF3J-DT     | MT1X     |
| MIR3910-2    | AGO4     |
| MIR103B2     | CALCRL   |
| MIR4641      | CDC42BPA |
| LINC01703    | CMTM8    |
| MIR6875      | DMAC2L   |
| MIR103B1     | FBXW7    |
| KRT8P3       | GALNT2   |
| MIR5692A1    | GLRX3    |
| UBE2CP3      | H2BC12   |
| MIR1843      | HBA-A1   |
| MIR9986      | IGHM     |
| MIR548BC     | JPH1     |
| LOC105369748 | L3MBTL3  |
| HVBS8        | LIG4     |
| MIR9985      | LRRC20   |
| LOC110599568 | MAP1A    |
| DPY30        | MAPK8IP1 |
| BCHE         | MICALL1  |
| KIR2DL3      | MMACHC   |
| RSL1D1       | MRPL19   |
| ACSL3        | NFASC    |
| ITGA7        | NRARP    |
| NDUFS8       | P2RX2    |
| GALNS        | PCDH9    |
| MT1E         | PHF14    |
| IMPDH2       | PLEKHG5  |
| MNX1         | PRAG1    |

|          |          |
|----------|----------|
| GDF9     | RBFOX2   |
| NARS2    | RHOJ     |
| PDSS1    | SLC25A36 |
| GALK2    | SLC26A2  |
| COQ2     | SLC4A11  |
| NBAS     | SNRPG    |
| WDR83    | THOP1    |
| FAM167A  | THPO     |
| FAM124B  | TIMM13   |
| TANC1    | TNXB     |
| DENND4B  | TRIM13   |
| PLUT     | TUBG1    |
| TDG      | UBL3     |
| INPP4B   | WNT2B    |
| IWS1     | WNT5B    |
| SPG7     | ADAMDEC1 |
| OSBPL8   | AMY1     |
| BNIP1    | CEP192   |
| SLC12A6  | CMAH     |
| NEIL2    | DGUOK    |
| ATP1B1   | FUT7     |
| ADH1A    | H2-K1    |
| ABCE1    | MAST3    |
| ETFA     | OCRL     |
| CTNBL1   | PLXNA1   |
| DERL1    | PSD4     |
| RASA4    | SEC11A   |
| TP53I11  | SERPINA9 |
| EPM2A    | SPG21    |
| DR1      | TAF1A    |
| PRDM4    | ZSCAN12  |
| FAAP20   | ATXN1    |
| NECTIN1  | DEK      |
| SOX9-AS1 | SLC16A2  |
| MSC-AS1  | SYNE2    |
| SYTL2    | CYP1A    |
| CCNF     | HBB-B2   |
| WFDC21P  | HSD3B4   |
| TKTL2    | CHSY3    |
| BMP8A    | FBXO42   |
| FMNL3    | UPK3A    |
| CANT1    | KLK1     |
| PDE3B    | PRKAG2   |
| APOC1    | BCAP31   |
| BMP3     | BTBD7    |
| CLIP2    | EED      |
| ADNP     | ERLIN2   |
| HNRNPUL1 | HOOK1    |
| ABCG1    | KMT5A    |
| NDUFA1   | LIN37    |
| MDH1B    | LZTS3    |
| CLTRN    | MAGT1    |
| NDUFAF4  | MARCHF5  |
| TIMMDC1  | MRPL23   |
| RANGAP1  | NCKAP1L  |
| HSD17B12 | NEDD8    |
| REPIN1   | NINJ2    |
| A2M      | OAZ1     |

|              |          |
|--------------|----------|
| SDF4         | PCDH10   |
| SEC14L2      | PDCL3    |
| TNFSF13B     | PKIG     |
| IL1RAP       | PTPA     |
| RBM14        | PTPN9    |
| CHN1         | RABAC1   |
| GRID2        | STOML2   |
| SERAC1       | TEX2     |
| REL          | TNKS1BP1 |
| COL15A1      | TRIM37   |
| U2AF2        | VPS37A   |
| USP25        | AP2M1    |
| CACUL1       | BACH2    |
| KLRG1        | BCKDK    |
| UQCRC1       | COX15    |
| PCSK6        | CUL4A    |
| SRI          | EP400    |
| TMEM165      | IFI47    |
| MIR1299      | LRBA     |
| MARVELD2     | SEMA7A   |
| UBE2L6       | SIX1     |
| NUP98        | SNRK     |
| MNT          | TINF2    |
| MOB2         | TRPS1    |
| IL2RG        | UCHL3    |
| DAPK2        | CAMK2B   |
| LOC110366354 | BUD31    |
| ARHGEF10L    | CCDC34   |
| VLDLR        | COL11A2  |
| HADHB        | CREB3L1  |
| ATP5MD       | CTDSP2   |
| INPP4A       | EPHB4    |
| EIF3B        | GABRP    |
| JADE3        | GALNT11  |
| IPO5         | GNG5     |
| ITIH5        | HEBP1    |
| LOC111162621 | HOGA1    |
| DPT          | KIF2A    |
| DDX41        | MAN1A1   |
| NUBPL        | MICB     |
| TOM1L2       | MRPL4    |
| BCCIP        | MYCBP    |
| MIR935       | NANOS1   |
| DIAPH1       | NDUFC2   |
| MOGS         | OSBP2    |
| COPB2        | SCAF11   |
| FOXL2        | SMYD2    |
| LIMA1        | STMN3    |
| GAD2         | STX2     |
| MYL9         | TBC1D5   |
| LTA4H        | TRIAP1   |
| SIN3A        | TRIM47   |
| RAET1E       | ZC3H13   |
| RNPEP        | CCS      |
| FMNL1        | COX5B    |
| DERL2        | NPTX1    |
| KIR2DL1      | NTRK3    |
| TMBIM6       | STAT6    |

|         |          |
|---------|----------|
| NPC2    | CD40LG   |
| CYP2C8  | ABI3     |
| ULBP2   | ANKRD40  |
| GATD3A  | CHIC1    |
| VAV1    | DENND2B  |
| CTF1    | EMC6     |
| ELP4    | HARS2    |
| SH3BP1  | HPS4     |
| NXF3    | IFITM6   |
| SGF29   | LRSAM1   |
| MIR517A | LYZ1     |
| MIR517C | MICALCL  |
| A2MP1   | MORF4L1  |
| MIR6508 | NUDT18   |
| CXCL6   | PLA2G2D  |
| INTS11  | POLDIP2  |
| UGT1A8  | PTTG1P   |
| HBP1    | SHLD2    |
| CYP2C18 | SYDE2    |
| FFAR4   | TMEM203  |
| CAD     | TMEM40   |
| OS9     | DEDD2    |
| KIR2DS5 | FMOD     |
| HHAT    | GJC1     |
| ATG10   | ITM2A    |
| RAB22A  | KLHL5    |
| TANK    | NUP50    |
| SMOX    | RPL37    |
| MYBBP1A | RPS5     |
| CXCL3   | SEC62    |
| ASAP1   | TMTC4    |
| CAMK1D  | TPCN1    |
| SAMHD1  | TUBB4A   |
| EXOC7   | ALYREF   |
| CPB1    | AMPH     |
| LSM4    | ANGPTL1  |
| TAX1BP1 | ANKRD33B |
| DHX30   | ARL8B    |
| BZW1    | ARPC3    |
| WFS1    | ATG16L2  |
| UGP2    | C1QTNF5  |
| MT-ATP8 | CCDC126  |
| F11-AS1 | CLN8     |
| SCARB2  | CYP2C12  |
| CCNK    | DNAJC19  |
| RBBP9   | DUSP11   |
| INSIG1  | EDN2     |
| GLYCTK  | F2RL2    |
| RNF103  | FMN1     |
| CHAT    | GOLT1B   |
| AFMID   | HIPK3    |
| TST     | ING4     |
| OTOA    | ISCA1    |
| PPM1H   | LDLRAD3  |
| MACIR   | MRPL20   |
| LRRC53  | NDN      |
| PTF1A   | NDUFS7   |
| CELA3B  | NRAP     |

|              |          |
|--------------|----------|
| PSME2        | NUP93    |
| COL16A1      | PANX2    |
| LZTS2        | PCBP1    |
| PIR          | RAD52    |
| PTGDS        | RALGAPA2 |
| SNRPD2       | RALGPS1  |
| EPG5         | RCOR1    |
| ROMO1        | RFNG     |
| SCRIB        | RLF      |
| MAP3K11      | SEC22B   |
| SRCIN1       | SELENOI  |
| AP2A1        | SESTD1   |
| SERPINF2     | SLC16A11 |
| PABPC4       | SLC26A1  |
| ELF2         | SPIN1    |
| POTEI        | SRPRA    |
| POTEJ        | STXBP4   |
| USP27X       | SUGT1    |
| KIR2DS1      | SUMO2    |
| IFNGR2       | TANC2    |
| LOC108281177 | TFAP4    |
| PPP1CA       | TK2      |
| ABHD5        | TOR1AIP1 |
| GALK1        | TRMT10A  |
| MTNR1B       | TXNRD3   |
| SEC13        | UTP3     |
| MAFA         | VDAC3    |
| GTPBP3       | ZFAND6   |
| ZNF746       | ZP3      |
| FGR          | GAS5     |
| GDF11        | KNTC1    |
| POTEM        | HNRNPU   |
| KPNA4        | SORBS1   |
| ZNF423       | INVS     |
| SUB1         | PPY      |
| ABR          | RNF169   |
| JKAMP        | SOWAHB   |
| MIR520B      | BCR      |
| ACSL1        | EHD1     |
| SS18         | GPRC5B   |
| NETO2        | KIFC3    |
| ITGAE        | LYPLA1   |
| LOC106560211 | SIK1     |
| NAGLU        | SLC29A3  |
| PPARGC1B     | SPRED2   |
| PUM1         | ZFP385A  |
| MIR802       | ACOT10   |
| RPS2         | AKT3     |
| ARNT2        | UGT2B17  |
| LOC111255645 | CAST     |
| SNIP1        | CGB3     |
| SLC19A3      | ETNK1    |
| PCCB         | GABBR1   |
| NDUFS2       | GABBR2   |
| SEC24C       | ITPR2    |
| NDUFAF3      | KCNQ1    |
| UFM1         | PFKFB4   |
| NDUFAF7      | PLCG2    |

|              |            |
|--------------|------------|
| POTEG        | BTBD11     |
| PDPK2P       | CNTNAP1    |
| ACTG1P1      | DNMBP      |
| ACTG1P14     | EYA4       |
| ACTG1P19     | GTF3C2     |
| LOC402221    | HOMER2     |
| SF3B3        | HUWE1      |
| LRP2         | KAZN       |
| DLX6-AS1     | KLHL13     |
| MIR543       | NSD1       |
| ENTPD5       | OCIAD2     |
| PHACTR3      | OSGIN2     |
| RAMP3        | PALM2AKAP2 |
| SOCS5        | RBCK1      |
| RIPK2        | RNH1       |
| USP42        | SMARCC1    |
| ACADM        | SNRPB      |
| HADH         | TMEM163    |
| NDUFS7       | TRAPPC6A   |
| SLC25A20     | UQCRQ      |
| MCCC1        | ZRANB2     |
| NDUFB9       | ACTR10     |
| NDUFA6       | ANKRD24    |
| MRPS16       | APOL9A     |
| NDUFS6       | ASB7       |
| TSFM         | CENPO      |
| NDUFA2       | CYP4A31    |
| DECR1        | EXOC8      |
| POLRMT       | FUBP3      |
| UQCRQ        | GPR1       |
| COX7B        | HOXA11     |
| GFM2         | KLHDC7A    |
| NDUFB11      | MAPKBP1    |
| MRPL12       | METTL16    |
| NDUFA11      | MGA        |
| MRPS26       | NCAPH2     |
| SDHAF1       | NDUFAF2    |
| COA4         | NGRN       |
| EIF3F        | PWP1       |
| RILP         | SYTL1      |
| NAA10        | TAF12      |
| TSTD2        | TPPP       |
| ELK3         | TRMT12     |
| ST6GALNAC2   | VPS16      |
| TACR2        | UGT1A8     |
| MIR320B2     | BCL2L14    |
| CSH1         | BRI3BP     |
| GPC4         | CHST8      |
| TM9SF2       | CRELD1     |
| ST8SIA1      | DDX23      |
| MIR616       | EID1       |
| POLR2K       | GLYAT      |
| RBP2         | KCNA3      |
| GIMAP5       | MLF2       |
| EIF4A3       | MLX        |
| SACS-AS1     | NECTIN1    |
| LOC105378976 | PLA2G15    |
| HSD17B4      | PLAAT4     |

|              |           |
|--------------|-----------|
| ADSL         | PPM1L     |
| KDM3B        | PRSS1     |
| PF4          | PTPMT1    |
| EVC2         | RAB34     |
| AFDN         | RNF170    |
| PLCD3        | SCN7A     |
| AP1G1        | TET3      |
| IFIT2        | TRIM32    |
| ABCF2        | ZFYVE1    |
| IL17D        | GRIA3     |
| LOC111162620 | SST       |
| SEMA3C       | ARHGEF26  |
| TINAGL1      | CD99L2    |
| RNF123       | CFL2      |
| PLA2G7       | EPPK1     |
| LOC110596866 | NUAK2     |
| WDR48        | PIK3R5    |
| RNASE1       | RIPK4     |
| NPTXR        | RSL1D1    |
| EPN3         | SND1      |
| CR1L         | SRP9      |
| LINC01551    | SSPN      |
| DLGAP1-AS1   | STAG2     |
| NCBP2AS2     | RASGRP1   |
| LINC00364    | AP1S1     |
| LINC01224    | CALU      |
| LINC02882    | CTNND1    |
| AURKAP1      | MIR155    |
| MIR888       | RSRC2     |
| LINC02476    | UBA1      |
| ZKSCAN2-DT   | ARF3      |
| LINC02835    | CHRNA1    |
| LOC111216291 | CPPED1    |
| TSGA10       | CPZ       |
| GCFC2        | CRLS1     |
| PDXK         | DNAJC15   |
| AP1B1        | HDAC8     |
| NELFCD       | HSPA13    |
| HIPK3        | LRIG3     |
| PLA2G4B      | LRRC8D    |
| GPM6B        | LYNX1     |
| CNTN1        | NANS      |
| PDE3A        | PCMT1     |
| SPRR1A       | PTPRM     |
| SIGMAR1      | PTPRR     |
| SCG3         | RECQL     |
| C4BPA        | RIPOR2    |
| ZWINT        | SHB       |
| LRRC59       | TDRD7     |
| PACRG        | TNFAIP8L1 |
| CPSF7        | ATP5D     |
| STX17        | BOLA2     |
| ATG101       | WNT16     |
| UBQLN2       | ATRX      |
| PLSCR1       | MAFK      |
| NRARP        | ATP6V0C   |
| PXN-AS1      | CHD9      |
| FAM172A      | CHRD1     |

|          |           |
|----------|-----------|
| PPP2CB   | CTHRC1    |
| TEAD4    | DOCK4     |
| CDK5R1   | ETV6      |
| C1S      | FOXC2     |
| TALDO1   | GRK6      |
| FARSB    | NDUFB8    |
| PSMA3    | RBMX      |
| VPS33B   | SPTBN2    |
| GATAD1   | TLN2      |
| KIR3DL2  | TSPAN7    |
| PSPC1    | ARRDC4    |
| YARS1    | G3BP1     |
| ADH7     | HCAR2     |
| WDR76    | PDPN      |
| CCR10    | AP2S1     |
| NR1D1    | APBB1     |
| RBM4     | ATP6AP1   |
| ESRP2    | BCS1L     |
| SUPT20H  | CASD1     |
| RNMT     | CCDC117   |
| PHF5A    | CD58      |
| TENT5A   | EIF2B5    |
| CNN2     | ERC2      |
| KRT23    | FLII      |
| TTPA     | FNDC3A    |
| KDM2A    | KCNIP3    |
| CATSPERZ | LRRCC1    |
| ABITRAM  | MANSC1    |
| P2RY6    | NDUFC1    |
| ABCA2    | NEK7      |
| SNX16    | NUP54     |
| MAF      | PRTG      |
| MIR486-2 | RBM26     |
| APOBEC2  | RNF24     |
| RAP1GDS1 | RNF26     |
| CLDN12   | SCFD2     |
| DUSP11   | SPAG4     |
| F9       | THNSL1    |
| CBFA2T3  | TSHZ2     |
| PARP4    | TTC7B     |
| B4GALT7  | UGGT1     |
| ARFGEF2  | ANAPC4    |
| UBE2D4   | ANKMY2    |
| ACBD3    | CYP2B15   |
| RANBP6   | DHRS7B    |
| ZBTB10   | GSPT2     |
| VDAC2    | HPS3      |
| APOL1    | KCTD17    |
| MGAM     | KLHL12    |
| LGALS2   | LSM14A    |
| H3-3B    | MTIF2     |
| BRD8     | NSUN5     |
| ADRA1B   | NUDT16    |
| VARs2    | PEX11B    |
| PMPCB    | PUS10     |
| MYLIP    | RESP18    |
| ARHGAP27 | RHOT1     |
| RGS3     | SERPINB6A |

|          |            |
|----------|------------|
| MAP3K13  | SLC35F5    |
| MRPL13   | SMNDC1     |
| RPA4     | SUSD1      |
| TM4SF4   | SZRD1      |
| TIPRL    | TM2D2      |
| INTS2    | TMPRSS4    |
| USP13    | TXNDC9     |
| CMTM7    | KCNMA1     |
| NRCAM    | BDKRB1     |
| UXT      | ABHD12     |
| LARGE2   | ACP2       |
| IFNL1    | ETF1       |
| CMTM4    | FZD3       |
| RANBP9   | GAB2       |
| PACSIN2  | GANAB      |
| AFF1     | HNF1B      |
| CLIC4    | LHPP       |
| GRHL3    | NBR1       |
| SLC22A4  | NCK1       |
| FAM3B    | PMM2       |
| PYCR2    | RAB5C      |
| GPRC6A   | SPHK2      |
| SLC44A3  | TRAK2      |
| CSRNP1   | WNT2       |
| PLTP     | DDX3X      |
| UBE2G1   | HLA3       |
| NANS     | NOL5       |
| ETNPPL   | PDHB       |
| SH3GLB2  | SCNM1      |
| CARD11   | SNX19      |
| SLC27A4  | ZFP704     |
| KLF15    | CHRNA2     |
| CHMP3    | DLX5       |
| PLEKHO2  | FURIN      |
| FOXN2    | KCTD15     |
| TNFRSF17 | RBM47      |
| CMPK1    | RERE       |
| PNPO     | SMIM3      |
| IGHMBP2  | SSBP1      |
| CASP12   | IL23A      |
| PPP1R15B | EPHA4      |
| CERS6    | CHCHD7     |
| PEX5     | CSGALNACT2 |
| PITHD1   | DDX24      |
| GPD2     | DPF3       |
| PRICKLE1 | EAF1       |
| KLF3     | EHBP1L1    |
| BTBD10   | FRMD8      |
| ASCC2    | FUT1       |
| ANKRD16  | G3BP2      |
| ANKRD23  | GNL2       |
| MIR6809  | HAP1       |
| HSD17B7  | ITGB1BP1   |
| ABCD1    | OSBPL2     |
| MAP3K10  | RAB13      |
| RNF168   | RAB26      |
| ERLIN2   | SLC25A32   |
| SAP130   | SLC25A45   |

|              |          |
|--------------|----------|
| ZNF362       | SPAST    |
| MAFIP        | TBC1D24  |
| IL1R2        | TCEAL1   |
| RACGAP1P1    | TLR8     |
| STIM2        | TRDMT1   |
| SLC35B3      | TSPAN6   |
| ADARB1       | UBL4A    |
| LOC110599585 | VTI1A    |
| SRPK2        | FTL      |
| SNX1         | LAMP3    |
| KLRC1        | TACSTD2  |
| MYH10        | CFHR1    |
| STK38L       | DNAJC17  |
| PIGK         | HOXC5    |
| STAG1        | TJAP1    |
| RGMA         | TMEM192  |
| CD8B         | ZC3H3    |
| NFIL3        | ZFP148   |
| DNAJC7       | ADIRF    |
| SNRNP70      | CAPRIN2  |
| CHPF         | CNNM4    |
| ZNF510       | CRCP     |
| MAP7D1       | CWC27    |
| ZNF395       | CYHR1    |
| ABRAXAS2     | DCLRE1C  |
| MIR431       | FAM120B  |
| MFSD2A       | HEATR5A  |
| EEF1AKNMT    | KCTD20   |
| APOA5        | LEO1     |
| UGT1A3       | LRRC49   |
| DPAGT1       | MIR183   |
| GNE          | MRPS2    |
| GNPTG        | MYOM3    |
| ERVV-1       | NUDT14   |
| AOX1         | RBM28    |
| ERLIN1       | RFX2     |
| EDC3         | RNF10    |
| UBQLN4       | SEC14L4  |
| DUSP22       | SECISBP2 |
| PLCL2        | SLC25A28 |
| ZNF341       | SLC41A3  |
| C15orf39     | TDH      |
| AP5B1        | TFCP2    |
| ZNF83        | THUMPD1  |
| PPP3CA       | TMEM165  |
| GAS2         | TRIM9    |
| SMAD9        | TUBD1    |
| GATAD2B      | ZDHHC9   |
| APCDD1       | BHLHA15  |
| BAZ1A        | CAB39L   |
| TENM3        | LPCAT2   |
| FNBP4        | NPC1L1   |
| C9           | PARP2    |
| MARCKSL1     | PARPBP   |
| PIAS2        | PGM2     |
| HCFC1        | SERPINA5 |
| LMO2         | SH3RF1   |
| DBP          | ADCY1    |

|              |          |
|--------------|----------|
| PPIAL4A      | ADGRG6   |
| KRIT1        | GPATCH4  |
| OSBPL2       | GRB7     |
| NFE2         | GYS1     |
| HSP90AA2P    | LGALS2   |
| MIR664A      | MKLN1    |
| F8           | PRRX1    |
| PIAS4        | RASA3    |
| ACAA2        | SUOX     |
| ALDH1B1      | TOX3     |
| IL20         | AKR7A2   |
| ARL13B       | ANKRD17  |
| TCTN1        | CDX2     |
| GRIP1        | FER      |
| PROZ         | GNG4     |
| MTMR4        | GPX6     |
| PCDH1        | IFT88    |
| COL21A1      | KDSR     |
| ALDH1A3      | LIAS     |
| TRIB3        | MCEE     |
| PPP1R1C      | MORC3    |
| GPR182       | MS4A7    |
| GNPAT        | MTRR     |
| EDEM1        | NDUFB9   |
| CEP41        | NHLRC2   |
| SRP72        | PUF60    |
| ZC3H15       | TEP1     |
| ASB8         | THOC1    |
| WAPL         | TPST2    |
| CCDC86       | TTC30B   |
| KLRB1        | VCPIP1   |
| MIR939       | CLCA1    |
| MIR320B1     | ESRRG    |
| MIR1285-2    | FGF8     |
| LIPE         | GOSR2    |
| CYP4F12      | L1CAM    |
| LPGAT1       | MALT1    |
| PAMR1        | MAN2A1   |
| CYGB         | MLLT11   |
| RPL32        | NISCH    |
| ANKRD13A     | SEPTIN4  |
| MBTPS1       | STX1A    |
| MAN2B1       | CACNA1C  |
| FKBP8        | PRKG1    |
| IQSEC1       | ABCF2    |
| IL17B        | ACMSD    |
| PUS1         | AMPD2    |
| MYO1A        | ANKH     |
| SNRPA        | ARHGAP45 |
| SLC15A4      | AUTS2    |
| HIVEP1       | BNC2     |
| DNAJB12      | CDKAL1   |
| SLC23A2      | CTDSP1   |
| METAP2       | GDPD1    |
| RBM24        | GMPR     |
| ZFAND4       | HIC1     |
| MIR889       | KHSRP    |
| LOC109286563 | PDHX     |

|              |            |
|--------------|------------|
| CSDE1        | RFK        |
| CDC23        | SNRPA      |
| RGS2         | SNRPF      |
| KYAT1        | SPCS3      |
| THOC1        | SRP72      |
| TBX4         | SUZ12      |
| ISYNA1       | SYBU       |
| ACER2        | TRIM36     |
| MRI1         | UBFD1      |
| XXYLT1       | AHSA2      |
| CLIP3        | CES4A      |
| UBE2B        | HPR        |
| MKKS         | LOR        |
| TMEM67       | LY6C1      |
| ROBO4        | NELFCD     |
| IGHA1        | REG3A      |
| TRIM71       | ALG3       |
| ITIH3        | AMHR2      |
| SUPT16H      | DOCK3      |
| MARS1        | GDF3       |
| POLDIP2      | HIC2       |
| KIR2DS4      | ORC2       |
| ANKRD1       | PLD4       |
| KIR2DL2      | RC3H1      |
| SORD         | RRAGA      |
| CES2         | ST6GALNAC6 |
| NFATC3       | TMEM208    |
| PCTP         | UBAP2      |
| SNRPD1       | VIT        |
| LOC110013312 | BRD2       |
| SLC12A4      | NECTIN2    |
| PDIA2        | SPC24      |
| GAS8         | ADSS       |
| UBQLN1       | ANKZF1     |
| GLDN         | GREB1L     |
| F12          | INTS6L     |
| GK           | KCTD6      |
| PPP1CB       | METTL27    |
| OAS1         | ODAD3      |
| NUP155       | TNFAIP8L2  |
| MGAT1        | ZNHIT2     |
| GGA1         | BACE2      |
| RAB4B        | DAB1       |
| IER5         | DDAH2      |
| NIBAN2       | FZD6       |
| QARS1        | GMFB       |
| OSBP2        | KCNK5      |
| SOX13        | TAPBP      |
| B3GNT3       | A1BG       |
| CA11         | ADGRD1     |
| PPIP5K1      | ANKRD44    |
| ETHE1        | CERS4      |
| ANGPTL1      | CGRRF1     |
| COG8         | DENND3     |
| TMED6        | DTNB       |
| DTYMK        | EPC2       |
| FUT9         | GFER       |
| PKIA         | GFM1       |

|                |         |
|----------------|---------|
| CEP250         | IRAG1   |
| HIPK1          | KLB     |
| PITPNB         | LILRB4  |
| ASXL2          | MAP7D1  |
| ANKLE2         | MAVS    |
| ELMOD3         | PROK2   |
| SH3TC2         | PRXL2B  |
| PHYKPL         | RSL24D1 |
| CLINT1         | RSPH1   |
| VPS41          | SERTAD4 |
| WDR59          | TM6SF2  |
| WIPF2          | TTC17   |
| CEP192         | USP43   |
| CFDP1          | ZNF395  |
| DRAP1          | BZW2    |
| CDC42EP2       | CCR4    |
| DCP1B          | CDK12   |
| LRRC41         | CLCN5   |
| SPATS2L        | HNRNPM  |
| IRF2BP1        | IARS1   |
| RBM23          | KDEL2   |
| SUSD1          | MPC1    |
| THSD7A         | MYO5C   |
| ZNF512B        | NDUFB3  |
| ZBTB11         | NOX1    |
| GIGYF1         | PFAS    |
| ECHDC3         | PHACTR2 |
| OSBPL10        | PIEZO2  |
| SLC38A10       | RCC2    |
| NT5DC1         | REEP1   |
| MFSD6L         | SERINC5 |
| CCDC127        | SOX5    |
| MTMR11         | TCF7L1  |
| LDLRAD4        | TRIM63  |
| PILRB          | TYK2    |
| THAP4          | TRPV4   |
| FAM43A         | DNAJB6  |
| ARRDC2         | RYR2    |
| ZNF443         | CALCA   |
| GPBP1L1        | TAC1    |
| XAGE3          | CCR6    |
| LPAL2          | CST6    |
| C22orf46       | KALRN   |
| HSPA7          | PADI2   |
| BAALC-AS1      | PRRC2C  |
| CRYZL2P-SEC16B | AP3S2   |
| CENPJ          | APOL6   |
| MAFG           | ATXN10  |
| P4HA1          | AVEN    |
| KIR2DL4        | B3GALT1 |
| TTC21A         | CAPN8   |
| H2AW           | CCR5    |
| MORF4L2        | CD1D1   |
| GABRG2         | CLUH    |
| NPC1L1         | EIF3M   |
| LHPP           | ESRRB   |
| GRHL1          | FEM1B   |
| GMPS           | IPP     |

|              |              |
|--------------|--------------|
| UGT2B10      | IWS1         |
| GPX5         | KLHL9        |
| MKS1         | LIN54        |
| TTC8         | LPAR2        |
| EVC          | MRPL40       |
| TMEM237      | MXRA5        |
| PSRC1        | SPRR1B       |
| DCTD         | TADA2A       |
| MRPL3        | TM2D1        |
| LIMK2        | TMEM69       |
| NM           | VPS36        |
| FHL3         | VWA1         |
| CNKSR1       | APOL7C       |
| INVS         | EXD1         |
| TEAD2        | SERPINA4-PS1 |
| IGHM         | JMJD6        |
| MIR544A      | MT1H         |
| MIR1258      | PDE4A        |
| RPL10A       | TBXA2R       |
| HELZ         | VGf          |
| RHBDD1       | ATRN         |
| HDGFL3       | CCDC68       |
| SPNS2        | CLIC5        |
| PSG5         | DDX60        |
| CNTFR        | GCDH         |
| POLR1A       | GRIK5        |
| TOP1MT       | NOL8         |
| SNX14        | PCP4         |
| JCAD         | PLA2G4C      |
| MIR1269B     | PRMT5        |
| SELENOS      | RIT1         |
| LOC111188164 | RMDN2        |
| LOC111242783 | SLC27A3      |
| STAM2        | SPOCK1       |
| CDC40        | TP53BP1      |
| RSPO3        | AMMECR1      |
| RYR2         | ARHGAP20     |
| ECSCR        | ARL3         |
| CYP7B1       | ATG16L1      |
| ADI1         | BANP         |
| ATF7         | BRINP1       |
| TAF9         | CBLC         |
| STAB1        | CES1C        |
| PRSS22       | CES1F        |
| CENPM        | COQ7         |
| LYPD6B       | GABARAP      |
| SELENOK      | IKZF2        |
| PIP4P2       | JPH2         |
| SNHG10       | MED10        |
| LINC00205    | MYH3         |
| ROR1-AS1     | NDUFA6       |
| ZNF385D-AS2  | PPP1R13L     |
| RTE1         | RAB2A        |
| ADAMTSL3     | RMND5A       |
| CYP51A1      | SCFD1        |
| LOC110467516 | SHOX2        |
| GNA14        | SMN1         |
| RPL27A       | SNRNP70      |

|              |         |
|--------------|---------|
| SIK1         | SOX3    |
| CPNE3        | TRF     |
| RDH10        | TUBGCP3 |
| ZBTB24       | TUG1    |
| PTGIR        | NEFH    |
| LMAN1        | SLC22A6 |
| RTN3         | IFI27L1 |
| SLC30A9      | IPO13   |
| LRRFIP1      | MRPS25  |
| ADAMTSL4     | NOP14   |
| H2AC19       | PKNOX1  |
| MIR1228      | TUBGCP2 |
| NAGK         | ZKSCAN3 |
| FBXW11       | DPT     |
| OAZ1         | PIK3C2A |
| RPS25        | SLC4A2  |
| TCTA         | SP5     |
| BMP8B        | ASB11   |
| CDCA3        | HMCN2   |
| IL20RA       | IZUMO4  |
| RNPC3        | STFA3   |
| HCAR1        | CRIP1   |
| PRKD2        | NNT     |
| PTGR1        | RIPK3   |
| L1TD1        | NTS     |
| SRM          | CAP1    |
| IL19         | CBFB    |
| SLC23A1      | CIITA   |
| MEP1A        | CLSPN   |
| UBE2V1       | CPB2    |
| ARCN1        | CYP46A1 |
| RAB5C        | DEPDC7  |
| APBB1IP      | GLRA1   |
| HKDC1        | MCM8    |
| RNF114       | MLC1    |
| SSR1         | MNS1    |
| STAU1        | NAA38   |
| MTREX        | NPR1    |
| LOC109286556 | SASH1   |
| SMPD3        | ARMC8   |
| POLR1C       | BOLA1   |
| HDAC10       | CFAP20  |
| EXOSC8       | CSPG5   |
| ZMYND11      | CTDSPL2 |
| ZCCHC8       | DDX25   |
| CALCOCO2     | GMPPA   |
| JPH4         | GNPTAB  |
| INPP5E       | GORASP2 |
| PCSK5        | HIRA    |
| DGKE         | HSPBP1  |
| AKR1D1       | MICALL2 |
| IGFALS       | MIR214  |
| ARHGEF18     | MIX23   |
| RPIA         | NDRG3   |
| PTPN5        | NDUFB7  |
| UBE3B        | NXT1    |
| P2RX2        | POU4F2  |
| GNPTAB       | PUM2    |

|          |          |
|----------|----------|
| AP1S3    | QKI      |
| ARHGAP29 | RASSF7   |
| FN3K     | RNF11    |
| MOB1A    | RNF7     |
| PDLIM1   | SCEL     |
| SMOC1    | SIDT1    |
| GGA2     | SLC25A46 |
| B4GALT3  | SPATA6   |
| ARHGAP10 | SPG20    |
| MAF1     | TINAG    |
| ACSM3    | TMEM119  |
| EPS8L2   | TMOD4    |
| EPS8L3   | YLPM1    |
| RHBG     | ACTR2    |
| MYL6B    | ADAR     |
| PLCH2    | ARHGEF9  |
| USP30    | BCAM     |
| LMAN2    | CAPN3    |
| FLG2     | CD3E     |
| MEX3B    | CEP70    |
| CHML     | CLDN23   |
| EIF5B    | CLIP2    |
| PARP10   | DIAPH2   |
| CCL24    | DSE      |
| FKBP7    | EIF2AK1  |
| FRMD5    | GALK2    |
| COPG1    | HSPB2    |
| USP29    | LARGE1   |
| ANAPC4   | MAP3K3   |
| BRI3     | MEN1     |
| FUNDC1   | PPTC7    |
| FCRL1    | RAP1GAP2 |
| RBFOX3   | SDHD     |
| TBRG4    | SLC44A3  |
| TMBIM1   | SMARCA1  |
| IFNLR1   | SNX9     |
| YTHDC2   | SULT2A6  |
| MIF4GD   | SUSD3    |
| UNC50    | SYTL5    |
| GPR137   | TMEM107  |
| SH2D5    | TRIM38   |
| WDR70    | VWCE     |
| ZCCHC13  | ATP1B2   |
| TRIM50   | FLG      |
| UAP1L1   | KCNQ2    |
| ANKRD34B | MRAS     |
| IGFL3    | PDE7A    |
| ELSPBP1  | GAD2     |
| RBMV1F   | HJV      |
| ACP7     | MXD3     |
| RBMV1J   | RNASET2  |
| KIR2DS3  | SBK1     |
| RBMV1B   | SF3B1    |
| RBMV1D   | STEAP2   |
| RBMV1E   | TFEC     |
| KIR2DL5A | UBR4     |
| NRON     | USP36    |
| SNORD126 | ABRACL   |

|              |          |
|--------------|----------|
| FAM86B3P     | BIRC7    |
| CAMTA1-DT    | CLDN9    |
| H3P16        | DCLRE1B  |
| LOC112543491 | FCRL5    |
| LIMS2        | LHFP     |
| OSBP         | NAA16    |
| STARD7       | NCDN     |
| SLCO6A1      | NDUFA4L2 |
| SCP2         | PAPPA2   |
| PPP1R3A      | PHF20    |
| TOPORS       | PICK1    |
| ATP6V0C      | PIGH     |
| NAIP         | SCRN2    |
| TMEM231      | STRN4    |
| CD84         | THAP4    |
| ANTXR2       | UBAC1    |
| MIP          | USP6NL   |
| HMG20A       | CACNA2D1 |
| TAF10        | CALB2    |
| MORC4        | CASK     |
| ISCU         | HTRA2    |
| MBD3         | PDLIM2   |
| ITIH1        | CHRM2    |
| TRA2B        | CHRM3    |
| GGT7         | ARHGEF16 |
| SNAI3        | CKAP5    |
| SOCS7        | COX11    |
| MRM3         | DDX18    |
| APLP2        | DNAJC21  |
| STRA6        | DYNC2I2  |
| SON          | EMG1     |
| AP2A2        | FAM171B  |
| MMUT         | HSD17B13 |
| PLEKHG6      | KCNJ16   |
| GOLIM4       | LSM6     |
| SLC25A4      | MLYCD    |
| UNC45A       | MRTO4    |
| MAN1A2       | MUSTN1   |
| STAM         | PITPNA   |
| ACOX3        | PKNOX2   |
| C4BPB        | PPM1H    |
| GOLGB1       | RHEBL1   |
| SNX17        | RPL35A   |
| UBXN11       | SDAD1    |
| ANKRD27      | SLC6A14  |
| ABTB1        | TAB2     |
| STBD1        | TRPM6    |
| LOC110599575 | TRRAP    |
| LOC110673974 | TTC9     |
| HEYL         | VAPA     |
| GSDMD        | ABHD14A  |
| LTBP3        | ACVR2A   |
| TXK          | ANKRD46  |
| STK25        | ATXN7L1  |
| PFDN5        | BAZ2A    |
| AIG1         | CD79A    |
| PI15         | CEP170   |
| DEPDC7       | CHRD     |

|              |          |
|--------------|----------|
| LCORL        | MIR182   |
| SECISBP2L    | MIR27A   |
| MIR1203      | MRPS30   |
| ANK3         | NBEAL1   |
| ANAPC2       | NCOA5    |
| CD7          | TIMM8A1  |
| SUPT5H       | TMEM109  |
| ASCC3        | TMEM62   |
| MTF2         | TTC14    |
| FBXO38       | ERO1A    |
| COPB1        | CCL21B   |
| NIT1         | CES3A    |
| TRIM62       | CIB3     |
| HTATSF1      | COL24A1  |
| CAMSAP1      | FOXI2    |
| PPIL4        | PNPLA5   |
| CNTROB       | SPIN2B   |
| ANKRD28      | ENG      |
| CECR2        | HEXIM1   |
| NKRF         | IL32     |
| LAMTOR1      | ITGB3BP  |
| BLNK         | KMT5B    |
| HRH1         | PIK3IP1  |
| RAB4A        | PIP4K2A  |
| RPL28        | PLXND1   |
| HMBOX1       | PTPRN2   |
| LGSN         | RAB6A    |
| RNF4         | SNRPN    |
| TMBIM4       | SPA17    |
| SLC6A6       | BBX      |
| ZSCAN4       | SLC22A23 |
| LOC107372315 | ADRB1    |
| MSTN         | DPYSL2   |
| SPR          | ARPP21   |
| CYP4A11      | ATP9A    |
| AIFM3        | CBX6     |
| PDLIM2       | CCRL2    |
| BTBD2        | COLQ     |
| PDCD7        | CSPP1    |
| ZBTB3        | DMXL2    |
| SLC6A4       | EYA2     |
| ITK          | FAM110C  |
| RNASE2       | GATAD2A  |
| ATRN         | GLCE     |
| ZAR1         | INS2     |
| CNTN2        | LNX1     |
| PNKP         | MARVELD1 |
| SLC27A2      | MTMR4    |
| RLBP1        | ND4      |
| VAPA         | NUP88    |
| PIGQ         | PIN1     |
| PAPOLA       | PRKG2    |
| CAPN6        | PRRC2A   |
| SGMS1        | RAMP3    |
| PITPNA       | RPL39    |
| DSTN         | SGPP1    |
| UCK1         | SH2D4A   |
| MX2          | TRAF3IP2 |

|              |         |
|--------------|---------|
| ORAI2        | ZFP37   |
| GAL3ST4      | SHANK2  |
| MRPL19       | BRMS1   |
| OSBPL3       | CCDC107 |
| OSBPL6       | CUZD1   |
| OSBPL7       | CYP4F11 |
| ABHD11       | DTD1    |
| HSPBP1       | FASTKD1 |
| ITGAD        | GOLT1A  |
| RBM19        | GSTCD   |
| SPZ1         | HBG1    |
| TXLNG        | INKA2   |
| CSH2         | KBTBD7  |
| EMC2         | MED18   |
| JMJD8        | NHLRC3  |
| KMT5C        | NOL7    |
| DENND2B      | RBBP5   |
| SLC49A3      | SUPT3H  |
| IGKV2D-29    | TAF4A   |
| LOC106707173 | TENT4A  |
| NPHP4        | TYW3    |
| SLC5A2       | USP42   |
| IDI1         | CXCL11  |
| PDE6D        | ABLIM2  |
| TRHR         | ADH1A   |
| KCNN2        | AGPAT3  |
| RABGEF1      | ALPK2   |
| TIRAP        | BTRC    |
| MYLK3        | CLPTM1L |
| EPN1         | CNBP    |
| PPP2R5E      | CPXM1   |
| DBNL         | ETV1    |
| SCRN1        | FICD    |
| KIF3C        | FLRT3   |
| TRIB2        | G6PC3   |
| SERINC2      | GRIN1   |
| ZNF451       | HEY2    |
| GMEB1        | HLCS    |
| CHTOP        | HOMER3  |
| BUD23        | IPO5    |
| WDCP         | IVL     |
| MT1JP        | PRG2    |
| MAN2A1       | PXYLP1  |
| GPD1         | RAP1B   |
| H2BU1        | RNF43   |
| TRIM63       | SAP30BP |
| CEP290       | SAR1B   |
| BBS1         | SPPL2A  |
| DDX3Y        | SSR1    |
| MIR4484      | STYX    |
| DLGAP1       | TMEM263 |
| LARS1        | USP39   |
| RNF17        | WASF1   |
| CYP2D7       | YAF2    |
| KCNQ2        | ZBED5   |
| FMO3         | AARS1   |
| C1R          | ALPP    |
| SLC19A2      | C1QTNF4 |

|         |          |
|---------|----------|
| KYNU    | CDH6     |
| B3GAT3  | CPSF6    |
| TLK2    | CSDE1    |
| EIF2B4  | FAF1     |
| SEC24D  | FARSA    |
| KCNJ4   | GALNT12  |
| PTDSS1  | GHRH     |
| CLPB    | GYG1     |
| CLCN4   | HINT3    |
| DNAJB2  | KCNQ3    |
| EIF2B5  | MARCHF2  |
| PEX19   | MARCHF3  |
| TREH    | MRPL13   |
| CCM2    | NCKAP1   |
| HIRA    | NKX2-5   |
| RNF216  | NSFL1C   |
| SEC31A  | PCBD1    |
| ITSN1   | RELL1    |
| STX16   | RGS20    |
| ENTPD3  | RNF145   |
| MLC1    | RNF152   |
| DAAM1   | SAPCD2   |
| TOM1    | SCUBE2   |
| LEMD3   | SH3GL3   |
| SORBS1  | UBTF     |
| IL36RN  | VPS41    |
| VPS11   | CPEB4    |
| F13B    | CYP2R1   |
| EPN2    | GSK3A    |
| METAP1  | MTF1     |
| OAS3    | CLEC2H   |
| UBA6    | CYP4F16  |
| TSEN15  | FUZ      |
| TBC1D1  | HSD3B3   |
| RPS28   | TGS1     |
| ZNF41   | ACTN2    |
| MAN1C1  | DNAJB2   |
| ARFGEF1 | ERAP1    |
| ALG12   | GPX8     |
| ACMSD   | LRP6     |
| RHOT2   | MAP2K7   |
| DGCR2   | NPTX2    |
| RFK     | PGAM2    |
| OGDHL   | PHF19    |
| SLC43A2 | POLK     |
| PSMD8   | RAB5A    |
| TRAM1   | RPS27A   |
| TTC3    | SLC25A12 |
| TTC37   | TMTC1    |
| TCERG1  | TNRC18   |
| ZFYVE16 | UFD1     |
| CCL16   | ARC      |
| ASB2    | NR5A1    |
| EXPH5   | TP63     |
| LRTOMT  | ACOT8    |
| MED4    | ATAD2B   |
| ABHD6   | BNC1     |
| DCP1A   | CD2      |

|           |          |
|-----------|----------|
| RNF144A   | DLX4     |
| PPME1     | HOXA2    |
| SLC38A5   | IFI204   |
| LAPTM4A   | LSM10    |
| KIAA0319L | NAE1     |
| KLHDC8B   | PREX2    |
| LDB2      | SCOC     |
| AUP1      | SLC35E3  |
| BATF3     | STRAP    |
| APOF      | TBC1D30  |
| ESPN      | TIMM21   |
| CTR9      | TMEM120A |
| MPHOSPH10 | UTP6     |
| MOB1B     | XPO7     |
| DDX27     | AIDA     |
| DAZAP2    | ALG9     |
| MPPE1     | APIP     |
| NEU4      | ARHGAP6  |
| PSG3      | ATP13A1  |
| PAPPA2    | CYB561D2 |
| OSBPL9    | ELP5     |
| UGGT1     | FAM184A  |
| ZDHHC3    | GLB1L    |
| ZNF76     | HCCS     |
| AZIN2     | ISY1     |
| GDPD5     | LIMD1    |
| CCDC65    | MED4     |
| CUEDC1    | RELT     |
| RMND5A    | SETD3    |
| EPS8L1    | SHPK     |
| MTFR1     | SLC4A3   |
| EFHD1     | TIAM2    |
| CALCOCO1  | TMEM258  |
| CREBZF    | VPS39    |
| SF3A2     | VTI1B    |
| IFT20     | FBXW9    |
| SNRPD3    | SLC24A5  |
| SAA2      | CNP      |
| SDK1      | PRKCG    |
| OAZ2      | PSME4    |
| TRIM69    | ATP5B    |
| UBAC1     | ATP8B2   |
| REEP4     | BATF     |
| TMED1     | CCNL2    |
| CNTRL     | DMKN     |
| THAP11    | DVL2     |
| THAP5     | DYNC1LI2 |
| ZFYVE1    | EMX2     |
| ZCCHC7    | GLIS2    |
| YIPF5     | KIF21A   |
| VPS8      | NDUFB5   |
| UBXN1     | NPHP1    |
| AVPI1     | RALBP1   |
| DOHH      | RGMA     |
| GPR107    | SH3BP4   |
| PLEKHB2   | TXNDC16  |
| NSMCE4A   | CACNA1D  |
| PID1      | COX3     |

|          |          |
|----------|----------|
| TOX4     | DDIAS    |
| TMUB2    | EBI3     |
| TRIM41   | EIF6     |
| TSKU     | IL16     |
| QRICH1   | POLR3G   |
| TMEM214  | PTGFR    |
| KIF18B   | RPTOR    |
| RNF167   | SLC31A2  |
| VCPIP1   | SOBP     |
| ZNRF2    | SVEP1    |
| VPS51    | AMFR     |
| RMND5B   | COL4A4   |
| CLEC14A  | CPT1C    |
| CSRNP2   | CYB5R2   |
| NRBP2    | DENND2C  |
| THAP2    | DENND5B  |
| ZMYM5    | EGFLAM   |
| ZNF106   | FKBP8    |
| ZBTB44   | GABRB1   |
| FAM161B  | IL3      |
| MTMR10   | KCTD9    |
| MSL2     | LMF1     |
| MRFAP1L1 | MIB1     |
| SPATS2   | NAALAD2  |
| PLGLB2   | NDUFA11  |
| NUDT22   | NUP58    |
| TPRN     | POLR1A   |
| TBC1D10B | PUS3     |
| ZFP2     | RIPPLY3  |
| ZNF484   | RNF141   |
| ZNF557   | ROPN1L   |
| ZNHIT6   | SLC15A4  |
| TPRA1    | SLF1     |
| UGT1A5   | BARX2    |
| YIF1B    | CHD4     |
| YLPM1    | DNPH1    |
| C11orf24 | GPR3     |
| C11orf54 | HINT1    |
| CCDC181  | HOXD8    |
| FADS6    | KRT86    |
| METTL22  | MEX3B    |
| C9orf64  | MIR148A  |
| CLEC4C   | NDE1     |
| PPP1R26  | OST4     |
| TMEM139  | PDK3     |
| ZNF518A  | SELENBP2 |
| ZNF329   | SYAP1    |
| ZNF107   | TAOK1    |
| ZNF800   | UBXN6    |
| ZBED5    | AFAP1L2  |
| ZBTB6    | AOPEP    |
| ZZEF1    | ASTN2    |
| NCKAP5L  | CD79B    |
| PPP1R37  | CHST1    |
| LBX2     | CLCN7    |
| RUNDC1   | EHF      |
| ZNF587   | EMCN     |
| ZNF675   | EXOC3    |

|                |           |
|----------------|-----------|
| CNMD           | GHITM     |
| UBALD1         | GRHPR     |
| PUM3           | HIRIP3    |
| OR4F6          | KRCC1     |
| MACO1          | NEGR1     |
| CEMIP2         | OSBPL8    |
| ZNF587B        | RASD2     |
| MYG1           | SEC13     |
| TLCD3B         | SFXN4     |
| DEPP1          | SH3GL2    |
| DHRS4L1        | SLC12A1   |
| DIPK1B         | STUB1     |
| PLAC4          | TMOD2     |
| DHRS4-AS1      | TTC39B    |
| GOLGA2P5       | TTLL7     |
| PLGLA          | WWP1      |
| HSD17B7P2      | AKR1C20   |
| MIR525         | CBARP     |
| LINC00273      | CD180     |
| TEKT4P2        | CHPF      |
| GSTA7P         | CPNE7     |
| GPRACR         | CPSF1     |
| B3GAT3P1       | DZIP1     |
| LOC100134317   | ECEL1     |
| IL6RP1         | FAN1      |
| HVBS7          | GET3      |
| LPAL1          | LRRC42    |
| AIR            | LRRFIP2   |
| LOC110599569   | MIR193A   |
| LOC110631417   | MRPS24    |
| LOC110740340   | NARS2     |
| LOC111216288   | POMGNT1   |
| LOC111242785   | PROZ      |
| EGID-106632268 | RANGRF    |
| LOC107963949   | REG3B     |
| IFRD2          | SH3GLB2   |
| KCNH6          | SHROOM4   |
| OAS2           | SLC41A1   |
| PPP4R1         | SNRPB2    |
| FETUB          | TMEM159   |
| TAS2R38        | TMEM65    |
| RCOR3          | TMEM71    |
| LRRC47         | TOMM34    |
| MIR320C1       | TRMT5     |
| LOC110599580   | UNC50     |
| GDA            | ZMYM6     |
| ABCD2          | FEZ1      |
| EXOSC5         | KRT14     |
| HS3ST3B1       | RAB3B     |
| PRELID1        | ADRM1     |
| ZNF300         | BPGM      |
| ADGRF1         | CPOX      |
| MIR1908        | EML4      |
| MIR573         | MARS1     |
| MIR921         | NDUFA2    |
| EPHA6          | SLC27A4   |
| MOAP1          | TNFRSF10D |
| ANGPTL6        | AFAP1L1   |

|           |          |
|-----------|----------|
| C3orf33   | ARVCF    |
| CMTM8     | CBR4     |
| MTCH2     | CPXM2    |
| B9D2      | CSTF2    |
| FGF20     | DHRS1    |
| GZMH      | DOK4     |
| ZBP1      | H2-AB1   |
| GNG3      | HK3      |
| WDR19     | IFT74    |
| ADAMDEC1  | IMMP2L   |
| F11       | KDM2A    |
| MMRN1     | M6PR     |
| DYNLL2    | MARVELD2 |
| PZP       | MIR93    |
| IFI6      | MNT      |
| EXOC8     | PFDN5    |
| JCHAIN    | PRRC2B   |
| ZBTB4     | RABGGTA  |
| IGHG2     | RMDN1    |
| IGHG4     | SCTR     |
| IGHA2     | SCX      |
| MIR658    | SEN2     |
| NPHP1     | SF3A2    |
| ARL6      | SGSM2    |
| BBS4      | SNTB2    |
| OFD1      | UMOD     |
| IQCB1     | UTP15    |
| GLIS2     | BSPRY    |
| BBS10     | CENPQ    |
| IFT122    | CTBP1    |
| TCTN3     | CYP4A3   |
| BBS5      | DEPP1    |
| CC2D2A    | DSN1     |
| NPHP3     | EIF4E3   |
| TCTN2     | GALNT16  |
| BBS7      | OTUD1    |
| ANKS6     | PARG     |
| TTC21B    | PFKFB2   |
| IFT80     | RFLNB    |
| B9D1      | SLC15A3  |
| TMEM216   | SLC17A1  |
| TMEM138   | SNCG     |
| BBS12     | WNK4     |
| CPLANE1   | YKT6     |
| GP2       | EEF1D    |
| SDF2L1    | ICE1     |
| UBP1      | MAPKAPK3 |
| SERTAD2   | SUMO1    |
| NME2P1    | SUPT4H1  |
| MIR19B2   | ABHD17A  |
| MIR190B   | ACAP2    |
| LINC01137 | ANAPC16  |
| PCNAP1    | ANGEL2   |
| PFN1P2    | CDKL3    |
| PFN1P3    | CHMP4B   |
| POMT1     | CMPK1    |
| MID1      | CYP2T1   |
| DHDDS     | EIF3L    |

|          |           |
|----------|-----------|
| CFP      | GGNBP2    |
| INPP5K   | GRAMD1A   |
| POMT2    | HOXD10    |
| KIFAP3   | ISG20L2   |
| LHX4     | KDM5C     |
| ADAMTSL2 | MAF1      |
| SP110    | MYBPC2    |
| AKAP10   | NICN1     |
| DRAM2    | NOL11     |
| COPE     | OASL1     |
| VPS28    | OBI1      |
| C1QTNF3  | OLR59     |
| CISD1    | PHOSPHO2  |
| SPPL2A   | PPP2R5D   |
| APOBEC3C | PTPDC1    |
| FBXO2    | RBM15B    |
| CHP1     | RIMBP2    |
| PPHLN1   | RSAD1     |
| PLP2     | SERGEF    |
| SLC38A9  | SPATA2    |
| HYAL4    | STIM2     |
| PLEKHF2  | SUPV3L1   |
| TTC1     | TEX10     |
| PDZRN4   | TNFRSF10C |
| REG3G    | TSN       |
| SYT13    | UTP11     |
| APOO     | ZFP207    |
| PARM1    | ZNF385B   |
| VPS37B   | DCTPP1    |
| MRGPRX3  | DPYSL4    |
| PLIN5    | HEG1      |
| PYROXD2  | LMO4      |
| RBM12B   | MAP7      |
| SP5      | NACC2     |
| ZCCHC4   | NRGN      |
| TAS2R46  | PLS1      |
| JADE2    | SULT2B1   |
| CNEP1R1  | KL        |
| CCDC146  | ABCF3     |
| SULT1A4  | ADAMTSL5  |
| TENT2    | AIM2      |
| VIRMA    | ALKBH1    |
| RSRP1    | ASB6      |
| TENT5D   | CTIF      |
| CASTOR1  | CYP2G1    |
| TENT5B   | GPN1      |
| REXO1L1P | H2BC15    |
| MIR320E  | MTRF1L    |
| MIR323B  | PEX11G    |
| MIR378I  | PKHD1     |
| MIR378D2 | POLR2K    |
| MIR378E  | PPP1R11   |
| MIR5193  | SSH3      |
| MIR4787  | UGT2B34   |
| MIR151B  | ZDHHC16   |
| MIR3679  | BAG1      |
| MIR378C  | MEF2A     |
| MIR320D1 | ADTRP     |

|              |         |
|--------------|---------|
| MIR4505      | AIF1L   |
| MIR4476      | IDH3G   |
| MIR4741      | JMY     |
| MIR513A2     | KLHL29  |
| SERTM2       | MSRB2   |
| SAMD12-AS1   | NAGA    |
| MIR3678      | NTHL1   |
| MIR378D1     | OSTM1   |
| MIR4257      | PDLIM4  |
| MIR4324      | PLCD3   |
| MIR320C2     | RPS9    |
| MIR320D2     | SARAF   |
| MIR581       | SEC23A  |
| MIR4632      | SPCS2   |
| MIR4638      | TAF15   |
| MIR4481      | TSPAN2  |
| MIR3714      | UACA    |
| MIR3616      | WDR33   |
| MIR2113      | AGAP2   |
| MIR3135B     | ALMS1   |
| MIR1973      | ARHGEF1 |
| MIR4467      | ATP10A  |
| MIR4749      | BET1L   |
| MIR4310      | CDH22   |
| MIR4717      | CLDND1  |
| REG1CP       | CPVL    |
| RIEG2        | CTNNA2  |
| HNP1         | CYSTM1  |
| LOC109279247 | DENR    |
|              | DLG3    |
|              | DPM3    |
|              | GAS2L1  |
|              | KAZALD1 |
|              | MIR200A |
|              | MKRN1   |
|              | PARD3B  |
|              | PDS5B   |
|              | PPIL4   |
|              | PTCH2   |
|              | PTS     |
|              | PUS7    |
|              | RBM4    |
|              | SFRP5   |
|              | SPATA7  |
|              | SPR     |
|              | SPTY2D1 |
|              | STAM2   |
|              | STN1    |
|              | SUMF1   |
|              | TWNK    |
|              | UTP4    |
|              | VPS29   |
|              | TG      |
|              | CYP2C19 |
|              | IFI44L  |
|              | MMP19   |
|              | RBP7    |
|              | SGMS2   |

STIM1  
XRCC2  
NAV2  
PECR  
ACRBP  
CDIPT  
CTNNBL1  
CYTH2  
DCUN1D3  
DLGAP2  
EIF1B  
ENHO  
FAM135A  
GABRR1  
KANK3  
KRT2  
MAEA  
MAST2  
METTL18  
MRPL52  
MSTN  
P2RY4  
PHPT1  
PIGK  
PITX3  
RGS18  
SDK2  
SNRNP200  
SNX6  
TIGD2  
VSTM4  
ZFP503  
ADAM22  
CHN1  
FNTA  
HAGH  
KAT6B  
MIS18BP1  
POLR3E  
PRCP  
R3HDM2  
SCIN  
SEMA4A  
MAFG  
SLC18A2  
AFMID  
BET1  
CEP76  
CIART  
CLN6  
DCAF7  
DERA  
DGKZ  
FKBP2  
FOXF1  
GCSH  
GIGYF2  
H3-4

HECTD2  
IIGP1  
MARK1  
MED21  
METTL1  
MIB2  
MOSPD2  
MPHOSPH9  
MTFP1  
NLRX1  
NMRK1  
ORC4  
OTUD7B  
PPIH  
REG3G  
RIN3  
RRP15  
SMAGP  
SPNS2  
CCL12  
CD28  
COX7B  
CSNK1D  
FZD5  
MYL6  
POLR2A  
SCAMP1  
SH2B3  
CER1  
ERDR1  
FAM131C  
B3GNT9  
BRF1  
C4BP  
CDK5R2  
CES2B  
DNAJC14  
DYNC2I1  
FBXO43  
GPN2  
H2-DMB1  
LAS1L  
LEFTY2  
MED12L  
MIR362  
MIR410  
PSENEN  
TMEM138  
PTGER2  
AP1M2  
AQP11  
CD164  
CNTRL  
CRMP1  
CTCF  
CTNND2  
FOXJ1  
HACD1

KIF21B  
MAN1A2  
MAST4  
MOB3B  
MSH3  
PPP3CB  
PSMD6  
RENBP  
RFX5  
RPL24  
SDCBP2  
XCL1  
ALPI  
CYP2C6V1  
EPHB2  
GPR137B  
INA  
PSMD11  
SPAG9  
AFTPH  
AKAP6  
AMT  
ANKRD28  
ANO10  
ARHGEF12  
BANK1  
BMP3  
BRCC3  
CCDC51  
CHODL  
DCTD  
DDI2  
ERC1  
EXOSC4  
FOXJ3  
GOSR1  
HOXB5  
HYDIN  
KRTCAP3  
LONP2  
MRPL48  
MYF5  
NHP2  
NTAN1  
NUDC  
NUDT3  
OASL2  
OTULINL  
PALD1  
PAX7  
PBRM1  
PGAP1  
RAB28  
RDH12  
RHBDD1  
RNF2  
SEC23IP  
SFMBT1

SLC33A1  
SMC5  
SMCO4  
SMURF1  
SNHG32  
SPINK5  
SPTB  
SPTBN4  
STARD7  
SUN2  
TGIF2  
TM2D3  
TMEM42  
TOMM70A  
TREH  
TTC12  
TTLL1  
UGT2B  
USP12  
UVRAG  
VPS4B  
VPS52  
ZBTB40  
ZBTB5  
ZDHHC20  
ZFP367  
ZFYVE28  
POLB  
IRAK2  
QARS  
SERHL  
ZFP622  
ADH1B  
AKAP8L  
C1GALT1C1  
GLCCI1  
IDH3B  
IKBIP  
KCNA2  
LYST  
PLA2G5  
RETNLA  
RYBP  
SETD5  
SLN  
TMCC3  
USP25  
VAMP5  
HS3ST1  
MAPK6  
MEF2D  
SCG2  
SCNN1B  
AGK  
ANAPC7  
DDA1  
DYNLRB1  
ENOPH1

GOLGA7  
HECW1  
INTS12  
LMBR1L  
MAD2L1BP  
MIR223  
POP4  
PTCD3  
RDH13  
RINT1  
RNF185  
SNAPC4  
TOR2A  
XAB2  
KRT1  
NPY1R  
BPHL  
CASQ2  
CENPV  
DGKI  
ECE2  
EXOC6  
FAM241A  
FOLH1  
FYCO1  
GDF9  
GGPS1  
GRHL3  
GUK1  
HLA-F  
MRPL3  
MTM1  
NDUFA12  
NTM  
P3H2  
PGGT1B  
RPS28  
S100A2  
SDCCAG8  
SNX7  
SYNJ2BP  
TMEM39A  
XPO6  
YARS2  
H2-D1  
LRRC24  
NLRP6  
SERPINA1B  
TRIM34  
WDR82  
ZFP53  
ZFP655  
AATF  
ACER3  
B3GNTL1  
BRAP  
BRD7  
CEP170B

COX10  
DDN  
GOLGA3  
HSPB3  
IGSF8  
MAPKAPK5  
MIR34C  
NOL10  
P3H1  
PRELID3B  
RCBTB1  
RILP  
SF3A3  
TBPL1  
TRAPPC1  
TSSC4  
TUT4  
UPRT  
WDR54  
ZC3H8  
ZNF217  
FH  
CENPJ  
CTTNBP2NL  
IFT80  
KCNAB1  
NUP98  
RGS12  
RPLP2  
RPS17  
SEMA3F  
SLC14A1  
STAC3  
TENM4  
CBL  
PLCB4  
IL13RA2  
BAG5  
CEP152  
CIB2  
DHX15  
DLEU2  
ELANE  
GNB5  
GTDC1  
ITGA11  
MCOLN1  
MGAT4A  
NAAA  
NOXO1  
NUP160  
PLEKHH2  
PLEKHO1  
PLPP5  
RAB10  
RAB18  
RAB8A  
SF3A1

SLC25A11  
SPATA20  
SYNPO2  
TAF1  
UNC93B1  
NF1  
CHGB  
GATA1  
GMPS  
GNG2  
GRIA4  
NIPBL  
PTPRJ  
RGS17  
SCN1A  
SFTPD  
AARD  
ANGPTL8  
BAIAP2L2  
CCDC137  
CXCR6  
FAM76A  
GORASP1  
KLHL22  
KLHL8  
LY6C  
LYRM1  
MSTO1  
MTX3  
PCGF1  
POM121  
PTK6  
RALGAPB  
SMAP2  
STARD3NL  
TAPT1  
WFDC18  
YIPF1  
ACTL6A  
ADAMTS12  
ARHGEF40  
CCDC25  
CIB1  
CIP2A  
CYTH3  
ELL  
LRFN3  
MAP3K13  
MARF1  
NMNAT3  
POLR2L  
PRPF3  
RAPGEF1  
RBM43  
RHNO1  
SNAPC3  
SNX2  
TCF15

UBL7  
UBR3  
UGT1A5  
WDR5  
ZFAND2B  
UGT1A10  
GNAS  
ARL4D  
BAIAP2  
CAMK1D  
CYP2D6  
GABRB3  
GHRL  
ICAM2  
KDM6B  
ADH6  
ALPK1  
BCL9  
CARD6  
CCDC88A  
CDCA4  
CYP4F2  
DENND4A  
DNTT  
DOCK5  
EIF1AX  
ELF4  
EPSTI1  
GJA5  
GRWD1  
H13  
H2-Q1  
HLA-DMB  
IFI27L2  
LMNB2  
LMO1  
MIR200C  
MPRIIP  
MUG2  
NCF4  
NDUFB10  
NRBP1  
NXT2  
PCLO  
PLEKHA2  
RMI2  
RPL23A  
RPS19BP1  
RTN4R  
SLC12A5  
SORCS2  
SWAP70  
TFB2M  
TM9SF3  
UXS1  
SLCO1A2  
HRH1  
ACAD8

BTBD9  
DDX52  
DENND2A  
DIRAS1  
EXOSC6  
HOXB7  
IFNAR1  
LRRC3B  
MAML1  
MAPKAP1  
MEGF9  
MESP1  
MIR10A  
MIR150  
MRPS34  
PIGF  
PROCA1  
RASL10B  
SHC4  
SHE  
STXBP3  
TBRG1  
TRIM29  
TRIM33  
TSR1  
UGT1A6A  
UNC13A  
WIPI2  
YME1L1  
ZFP64  
TRPV1  
ADAL  
CC2D1A  
CIAO2A  
DNAJC8  
EIF3K  
FBXO41  
HELB  
LRRC15  
MEP1A  
MRPS21  
MRPS5  
NAT8F2  
PJA1  
PSMF1  
RBM10  
SETDB2  
SHISA4  
SLC6A4  
SOGA1  
STAP1  
SUPT5H  
TARBP2  
TBCC  
TMEM9  
TRAPPC3  
TRPC4AP  
TTC38

ZDHHC3  
ZZZ3  
ASIC1  
CAPN6  
GCNT1  
IBSP  
PAX8  
SRSF10  
VAMP1  
WASF2  
ADAP2  
AGPAT5  
AVIL  
C15ORF48  
CNNM2  
DNAJC5  
DONSON  
EFTUD2  
GPR160  
HOOK2  
IGSF11  
LDB3  
MED13  
METTL7B  
MYO9B  
ND5  
NELL1  
NLGN3  
NXPH3  
PBLD  
RASSF3  
SCG3  
SPTSSA  
TBX1  
UNKL  
USP13  
XPNPEP1  
CH25H  
P2RY1  
AVP  
SLCO1B1  
ANKRD10  
CD22  
CTF1  
JAG2  
KDM4B  
LTBP3  
PCSK1  
PRPH  
RAPGEF3  
SELPLG  
TNRC6B  
GNAQ  
PTAFR  
SERPINA3  
CEACAM6  
CHKB  
CYP2D4

DPH2  
ELOA  
FIP1L1  
GSTM7  
HNRNPLL  
IRAK1BP1  
KIF16B  
MEIG1  
METTL3  
MIR205  
MRM3  
MS4A6A  
NENF  
NKG7  
NUP107  
PAFAH2  
POLR3D  
PPHLN1  
RAE1  
SLC39A7  
SMAP1  
TMBIM4  
UBE2Q2  
USP33  
VAT1L  
WDR90  
XRN1  
XYLT1  
COCH  
KCNJ11  
NKD1  
APON  
BORCS5  
BPI  
H2-DMA  
MFSD2  
MUC6  
MYCBPAP  
PRAP1  
RPS6KL1  
TFAP2E  
TRIM41  
WFDC12  
ALOX15  
HSPA6  
C2CD2L  
CHIL3  
CMIP  
COPZ2  
DVL3  
EPM2AIP1  
ERP44  
GGCX  
GNA11  
IFT122  
IGDCC4  
MGAT4B  
NHSL1

PCF11  
PDCD6  
PPP2R3A  
RIN1  
RPL19  
SETD2  
SH3PXD2B  
SNX16  
THSD4  
TPH1  
VGLL3  
ZC3H11A  
AGGF1  
ANAPC10  
ANKS6  
ARL10  
DDX51  
DESI1  
DGCR6  
EIPR1  
ELFN1  
ENDOU  
FGF6  
HABP4  
HOXA3  
LSM8  
MUC16  
NEMP1  
OTOF  
RNF122  
SPRYD4  
TCHH  
TM9SF4  
TMEM134  
ANXA10  
DOCK9  
EIF2AK4  
FAM149A  
GLI3  
GOLGA4  
KDM5B  
NMU  
SARS1  
SLC12A8  
TMED5  
TPBG  
CEL  
CYP19A1B  
FRY  
RPL13A  
RPL7  
TYRP1  
CYP4A32  
KRT25  
M1AP  
SPRED3  
AKAP11  
AMN1

ARHGAP31  
ATL3  
CEP68  
CLASP1  
CXCR5  
DAP3  
DOCK2  
ECPAS  
EVA1B  
FUT4  
FYTTD1  
GTF2H2  
HIKESHI  
HOXA9  
HS6ST2  
IAH1  
IFT57  
LOXL4  
MBLAC2  
MYL12A  
NDC1  
NDFIP1  
NLK  
NUFIP1  
NUFIP2  
PDSS1  
PGLS  
PKP3  
PLPBP  
PMPCA  
PTGES2  
PTPRA  
RHOV  
SAMD11  
SDHAF3  
SF3B5  
SLC17A3  
SPTLC3  
SYT13  
TEAD1  
TICAM2  
TMCC2  
TMEM117  
TRIM21  
UBASH3B  
UBE2M  
VWA8  
WAPL  
SERBP1  
DSTN  
FBXO9  
IDS  
PLEKHA6  
SAMD9L  
SCN4B  
SCNN1G  
SEPTIN9  
SLC6A1

TLE4  
GRIA1  
SLC25A37  
SRSF2  
ARMC1  
AUNIP  
BCL2L12  
COLEC11  
COX4I2  
DCTN4  
DDX59  
FBXO25  
GCOM1  
IL17RE  
L3MBTL2  
MRPL2  
NBEAL2  
OSGEPL1  
PACRG  
PISD  
PPP1R21  
PYGO2  
RER1  
SAV1  
SDF2  
SGCE  
SHISA3  
SLC7A6OS  
XKR8  
ABCA8B  
AP3B1  
CAPSL  
CCL13  
D17H6S56E-5  
ECI3  
FAM160A2  
GPSM3  
PELI3  
POLDIP3  
RDH7  
RIT2  
SERPINA3G  
TAF1C  
TMEM82  
TMUB1  
ZBTB14  
ZCCHC3  
ARHGEF6  
BLZF1  
CADPS  
CCDC88C  
CD109  
DYNC1I1  
FAHD1  
FAM102B  
FAM89A  
GRIP1  
KCNG1

NAGLU  
NUP37  
PNO1  
PRICKLE2  
RAB40B  
RASGRF1  
RPL11  
RPL29  
SLC32A1  
STON2  
TTYH2  
ZCCHC24  
ACE2  
ATP1A3  
ITGB8  
RBM39  
TMEM37  
ZBTB10  
ACOT11  
ARAP1  
ARFGAP1  
B3GAT2  
CCNT1  
CRYBG2  
EOGT  
GABARAPL2  
GRPR  
HS6ST1  
ITPKC  
LRP3  
MAN2A2  
MGAT3  
NIF3L1  
NKIRAS1  
PEX3  
PRKRA  
RABL3  
SLC16A13  
SLC2A14  
SNAP29  
STT3B  
SULT4A1  
TBL3  
TMED4  
HLA-A  
KCNA5  
PCDH18  
PDE9A  
SHANK3  
GAST  
HLA-B  
ALDH3B1  
EGLN1  
ARHGEF28  
CHST3  
CPA1  
DESI2  
DNASE1

FNDC1  
GABPB1  
GDE1  
HERC2  
IGSF1  
IL12RB2  
MIOX  
MOB1A  
MT1M  
PDE8A  
POU3F1  
RPL41  
SENP6  
SKA2  
SP4  
TMEM45A  
TRMT6  
CPLX2  
KCNK2  
PIK3C2B  
PRUNE2  
SEMA3A  
SFRP4  
APOV1  
LRIT1  
RAB9  
SKIV2L  
BIVM  
CAR13  
CCDC88B  
CDC42BPG  
CDK17  
CECR2  
CHMP2B  
DHX35  
DOLPP1  
DPH6  
EPYC  
FCF1  
GALC  
GPR157  
GPR162  
GUCY1B2  
HAGHL  
METTL6  
MEX3D  
MGRN1  
MIR203  
MIR31  
MOSPD3  
MRPL55  
MYOZ1  
NAA80  
NAPSA  
NEUROG2  
PIKFYVE  
POT1  
PTCHD4

RNF34  
SNX12  
TAF6  
TBC1D7  
UBL5  
UPF3A  
ZFYVE19  
AHCYL2  
ARMCX1  
CD99  
CLCA2  
COLGALT2  
COPB1  
CTTNBP2  
DHX37  
ERGIC1  
FAM126A  
FZD9  
GJB5  
GPR68  
HAVCR2  
HDAC10  
HYLS1  
IBTK  
JPT2  
LRRN1  
MAGEE1  
MARCHF7  
MED6  
MRPS26  
NSMF  
NUDCD1  
RILPL1  
RNF39  
SCAMP2  
SLC10A6  
SLC35B2  
SNAPC1  
TEC  
TREM1  
TSHZ3  
UBE2V2  
WHAMM  
CHST15  
PLP1  
PSPH  
SP7  
BTNL9  
PRRG2  
SCGB2A2  
SPRR2G  
ZNF32  
TMEM189  
CRH  
GRIN2B  
IRAK3  
NRXN2  
TNFSF12

BAZ1B  
BEX2  
CCDC6  
DPP9  
HIP1  
IL20RB  
ITGAE  
MCU  
MIPEP  
SFTPA1  
SLC30A3  
SLC30A5  
SLC9A3R2  
SNU13  
STK17A  
TRIOBP  
UGT2A1  
WDR77  
IL10RA  
PIK3C3  
TRPM7  
ABCA12  
AGPAT1  
ATP6V1H  
BNIP1  
C1QTNF3  
CALCOCO1  
CELF4  
CUL2  
DAZL  
FRMD3  
ICOSLG  
LRR1  
MACO1  
MED30  
MELTF  
OLIG2  
OPHN1  
P2RY12  
PHF21A  
POP5  
RASSF8  
RGS11  
RNF115  
RNF149  
RORB  
RPP25  
RTN3  
RUNDC3B  
SGCD  
SGSM3  
SNAPIN  
TCAF1  
TPD52L2  
TRIM23  
VPS33A  
WHRN  
WNT10A

APOO  
ATG4A  
C1QTNF7  
CD200R1  
COL21A1  
CYP2D26  
DDX20  
DNAH11  
EFCAB2  
FEZF2  
GRAMD3  
HS6ST3  
KCNQ4  
LGI3  
LMAN2  
LMX1A  
MIR15A  
MS4A6D  
NR6A1  
NSG2  
NUP62CL  
PHF7  
POFUT2  
RAB2B  
RXYLT1  
SLC25A39  
ST8SIA6  
TPSB2  
WDFY2  
ZCCHC9  
BAP1  
CDC42EP3  
EYA1  
ND1  
NRIP3  
SLC20A2  
TIMP4  
USP9X  
BRWD1  
CHRNE  
EPB41L4B  
HLA-C  
KPNA1  
MTARC2  
OSR2  
PDGFD  
PPCS  
SLC35F2  
SOX8  
TBL1X  
TMEM30B  
TNKS2  
WNT7B  
ZBTB21  
MT1G  
ARF2  
COMMD7  
CYP2J5

DKK4  
DRG2  
FBXW11  
FH1  
GIMAP1  
H4C2  
HEMGN  
HSP27  
KMT5C  
METTL17  
NUPL1  
POLR3GL  
SLC25A18  
SPCS1  
TMEM183A  
UGT2B36  
VRK3  
ZBTB34  
ZBTB45  
ZFAND4  
AFAP1  
CYP2D13  
DHODH  
DHRS2  
MYOD1  
THEM5  
ZSWIM3  
KCNJ2  
APEX2  
ARFGEF3  
ARPC5L  
BCL7C  
CCDC136  
CCDC18  
COL9A2  
CORO2B  
DLG2  
DPY19L1  
ELL3  
FKBP9  
GOLGA2  
H2BC9  
HRC  
ING2  
KANSL2  
LDLRAP1  
LINGO1  
MACIR  
METTL21A  
METTL8  
MYL3  
NAIP  
NOSTRIN  
NSUN2  
PMPCB  
PPP4R2  
PRMT6  
RGS8

RNF44  
SAP30L  
SIRT7  
SOCS6  
SS18L2  
ST6GALNAC5  
UQCR10  
WTAP  
ZBTB38  
ARNTL2  
CDC42EP1  
CLSTN1  
COL8A2  
COMMD1  
CYP2C18  
FNTB  
ITPKB  
OSR1  
POLR1D  
SF3B4  
TNFSF13  
VPS13A  
YPEL1  
ADCK5  
CCDC127  
CEP95  
CHERP  
CHST12  
CLCC1  
CLEC4A  
CMTM4  
COPS3  
COPS8  
ELAPOR1  
ELMOD3  
GALNT4  
KATNB1  
LZTR1  
MED15  
MIP  
MIR10B  
MIR20A  
MIR212  
MIR30D  
MRPL11  
MYOT  
NIPA1  
PDE6D  
PHLPP2  
PLEKHA4  
PMF1  
POLM  
PPP1R3G  
PQBP1  
PWWP3B  
REG4  
RETNLG  
SMARCAL1

SRA1  
SWT1  
THG1L  
THSD1  
TOX4  
UGT2B35  
COL16A1  
CPM  
NARS1  
PPP2R1A  
KRT7  
TPO  
ABR  
APBA1  
CNNM3  
CYRIB  
CYTH1  
DACH1  
DET1  
DOP1B  
EFNB3  
EGFL7  
ELMO2  
ETV3  
FASTKD2  
GLRX2  
GRAMD1C  
HELZ  
IFT27  
LSM3  
LUC7L3  
MATN3  
NOP53  
PARP4  
PHF11  
PIEZO1  
PNLIP  
POLR3K  
PTRH1  
SAFB  
SGPP2  
SMPX  
TRIP6  
VIPR2  
XPO4  
INCA1  
KLK1B27  
ABL2  
H1-2  
SEMA5A  
SYN2  
ARMCX5  
BICRAL  
BRPF1  
BRSK2  
CABLES2  
CAR1  
CILP2

DARS  
DNAI4  
DPM2  
EMC1  
ENTR1  
FAM72A  
GALNT9  
HSF2BP  
MPND  
MRPS35  
PIP4P1  
RNF180  
RNF220  
SCGN  
SNX15  
TSTD2  
TTLL10  
IL24  
AFG3L2  
ARHGAP4  
B3GALNT2  
B3GNT3  
BBS7  
BEND3  
CACNA2D4  
CASQ1  
CHML  
CRLF3  
CTR9  
CYB5R4  
DCBLD1  
EXOSC7  
FAHD2A  
GTF2A2  
KPNA6  
LCMT2  
LDAH  
LSM12  
MEX3C  
MMP23  
MRPL34  
MRPL39  
MRPS16  
NDUFB11  
NEURL2  
PMEL  
PPM1M  
PPP2R5B  
PPWD1  
PRSS16  
SLC17A9  
SOCS7  
SPATA5  
TIMM8A  
TRPC5  
UBA3  
WDR44  
YOD1

ZBTB8OS  
ZNF703  
ACVR2B  
ATP6V1C1  
GAR1  
IL18R1  
ITGAL  
MLLT3  
MYCL  
PSMD3  
TLCD1  
ART1  
ASIC5  
SLC22A13  
ZFP612  
ARL5B  
B4GALT2  
B9D1  
CAMSAP1  
CDC37L1  
CDON  
CLDN6  
DCAF8  
FANCL  
GATA5  
GCC2  
HCFC1R1  
LHX8  
MARCHF1  
MOCS2  
NEURL1B  
OTX1  
PLAGL2  
RAB15  
RHOH  
RUFY3  
RYK  
SH2D5  
SMARCB1  
SOX7  
SSR4  
STOX2  
TRIM54  
UBE2G1  
WBP1  
ZFYVE21  
ZRANB3  
CCK  
HTR2B  
CA9  
HOMER1  
FLVCR2  
ING3  
JAM3  
PCMTD1  
PREP  
STARD10  
TMED9

WDR43  
ANKRD29  
APOBEC3C  
ARFIP2  
ARL6IP4  
C1D  
CLEC3B  
CNPY4  
CNRIP1  
COASY  
CPA3  
DAAM2  
DDX54  
DGKE  
DIPK1B  
DOLK  
DPY19L3  
ELAVL3  
EXOC1  
FAP  
FGD3  
GOLM2  
KCNE4  
KIF12  
KLHDC8B  
LANCL2  
LEFTY1  
LYPLA2  
MIR23A  
MRPS17  
NEK9  
PALM  
PAX3  
PNCK  
PROK1  
RASIP1  
RBM18  
RNF5  
RPP25L  
RRP7A  
SIX5  
SLC38A9  
SLC6A18  
SPSB3  
STYK1  
SYT3  
TNFRSF8  
TRMU  
UBLCP1  
DUS3L  
HSDL1  
MIR429  
PKD2L1  
PLAC9  
RAB40C  
SERPINB10  
SLC39A2  
TGOLN1

TLL2  
TMEM104  
TMX2  
TUSC2  
GAP43  
CLASP2  
COPS4  
DLG5  
FOXK2  
GPSM1  
H2AC20  
H3C4  
JAZF1  
KCMF1  
LGALS7  
MCRIP2  
MIR141  
MIR221  
MREG  
PAPLN  
PDXP  
POU2AF1  
PTPN22  
SEC61B  
SPAG1  
STAG1  
UBAP1  
UPF2  
UST  
ARRB2  
PVALB  
HMGB3  
NOP58  
C1QTNF6  
COL4A3  
ITM2B  
PAG1  
PIK3R2  
POLH  
RBM33  
RCN3  
CLDN5  
TNS3  
AQR  
BCAN  
BMERB1  
BTF3L4  
CCDC9  
CEP78  
CHMP2A  
CNIH4  
CNOT2  
CTLA2B  
CYP4F6  
DEF8  
DYRK1B  
FAM3B  
FBXO4

INSC  
LDB1  
MCTS1  
MMP24  
OAS1F  
PAIP2  
PCDHGC3  
POLR1E  
PSD2  
RBM6  
SLC10A7  
SLC35E2B  
SLC66A2  
SREK1IP1  
TENM1  
TMEM139  
TMEM143  
TMEM164  
TRP53BP2  
URB1  
VPS8  
ZFP9  
ZNF148  
ZNF438  
ZNF827  
CAMK1  
CCDC85A  
CLCN2  
DPH5  
ESRP1  
EXPH5  
GJA3  
GPR176  
HLA-G  
KDM2B  
LCOR  
MAT2B  
NUCB1  
PANK3  
PRR15  
RALGAPA1  
SECISBP2L  
STYXL1  
SYNJ1  
TAF13  
TEX264  
TMEM204  
TRPC1  
UNC13D  
VAPB  
FOXO3A  
MUP9  
CGA  
ADCYAP1  
CCL24  
HRK  
KCND3  
KRT80

PHTF2  
PKD2  
PRR5L  
RNF213  
TNRC6A  
AGPAT9  
ARHGEF10L  
CASTOR1  
COMMD8  
CST7  
DNAAF5  
DPH1  
FUNDC1  
GFOD2  
MKRN2  
MRPS15  
MRPS9  
MYT1L  
NHEJ1  
NRSN1  
OSCAR  
PARP6  
PCNX3  
PPCDC  
RCC1L  
RHBDD3  
RNF167  
SCYL3  
SEMA6C  
SUPT6H  
TLX2  
USP54  
ZDHHC7  
LAMA4  
MOCOS  
ACSS3  
ADCY4  
BEST1  
DCPS  
EPC1  
GNB4  
GRM3  
HEYL  
MAP3K2  
OAZ2  
PARP8  
PI4KA  
SEC16B  
SLC30A4  
TRIL  
VAMP4  
ACSL6  
ADGRA2  
ADNP  
ANKRD2  
ARID5A  
ARL2BP  
BTBD10

CEP63  
CHST7  
CLDN15  
DEGS2  
GATAD2B  
GDI2  
HAUS7  
ICAM3  
IL22RA1  
IQCK  
LIN28A  
LPCAT4  
MIR29A  
MTPAP  
NODAL  
PLRG1  
PNOC  
PPP4R1  
RABGAP1  
ROMO1  
SETMAR  
SH2D3C  
SLC2A10  
SMYD4  
STMN4  
TRIM26  
UBE2D1  
UQCRH  
USP32  
WDR6  
YIPF3  
ZFP90  
ZNHIT6  
PTH  
TUBA1B  
OXT  
S100B  
NR0B1  
MUCL1  
ASB14  
ASB18  
CAR5A  
CHCHD4  
COL20A1  
COPS6  
CYP26C1  
DTX2  
FAF2  
FAM25C  
GP2  
GPATCH3  
HOXA7  
HOXB4  
KLF17  
KLK11  
LAPTM4A  
LIPT1  
LIX1

MFSD13A  
MLIP  
MORC2  
NAA35  
NEU3  
NT5M  
PARS2  
PSMD10  
RNF216  
SECTM1B  
SENP3  
SERPINB4  
SPAG16  
SRMS  
STOML1  
TGM5  
TMCO4  
TRIM44  
UBE2D4  
UFC1  
UGT3A2  
ULBP2  
WDR55  
WDR70  
ZFP106  
ZGPAT  
AFDN  
AKR1C19  
AMDHD2  
CAND1  
CCKAR  
EID3  
FAM189A2  
FILIP1  
GLIS3  
HPDL  
HSF2  
ISL1  
KIF26B  
LIPH  
MARK3  
MGAT1  
MSMB  
MTFR2  
NECAB1  
NR2C2  
PITPNB  
PLPPR1  
SERPINB6  
SLC30A7  
SNHG1  
SNRNP25  
SNX29  
THBS3  
TNFSF13B  
UBR2  
ZCCHC2  
BPTF

CACNB2  
COL13A1  
GALNT6  
KCNJ5  
LRRN3  
SLC11A1  
WFS1  
CYP51A1  
GCG  
NUP210  
PLIN1  
ARHGAP21  
B4GALT7  
CRTAC1  
DMPK  
EFR3A  
FAU  
GPR35  
HEMK1  
ICOS  
LETMD1  
MARS2  
MIR144  
MRPS12  
NEK1  
NT5DC3  
PACS1  
POGLUT1  
POPDC3  
PPAP2A  
RILPL2  
RNF150  
ROR2  
RPL7L1  
SH3RF2  
TCAIM  
TMEM256  
TSC22D4  
UBE3C  
VILL  
WNK2  
WRN  
ZBTB7B  
ISOC2B  
PFN4  
TECTB  
MOV10  
RAD17  
RB1CC1  
S1PR2  
SUV39H1  
TRIM14  
CTCFLOS  
NEFM  
BIRC6  
CCDC77  
CRBN  
DTX3L

EPHA5  
ERG  
FOXG1  
GABRE  
HAS1  
HES2  
KIF13A  
MTPN  
ORAI1  
PAK6  
RDM1  
RPL26  
SBSPON  
SLC44A2  
SRSF6  
TNFAIP1  
TSEN2  
SOS1  
CNR2  
CCL22  
ADPRHL1  
AP4M1  
APH1A  
ASPDH  
CREG2  
DHRS13  
DHX16  
DNAJC28  
DOK7  
FAM118A  
FAM160B1  
FAM234B  
FBXW2  
GZMK  
IFNLR1  
IFT46  
KLHDC10  
KLHL31  
LARS2  
MARK4  
MED28  
MIR126  
MIR503  
NCKIPSD  
NECAP2  
NIPSNAP3A  
NOTUM  
NTMT1  
OTUD6B  
PARP11  
PODN  
RALY  
RBMX2  
RCCD1  
RGS7BP  
RPH3A  
SLC36A2  
SPATA17

STRADB  
TBC1D19  
TENT2  
TLCD2  
ZBTB7C  
ZFYVE27  
ABHD17B  
APOC4  
BMS1  
CAPN10  
CCDC141  
CEP164  
COG4  
CRTC3  
DHPS  
EMD  
GCC1  
HELQ  
HSD3B  
HYAL2  
KBTBD2  
MIR143  
MIR146B  
MOB4  
NPY2R  
POLR2I  
PTK7  
QK  
RNF207  
RNF38  
RSBN1  
SSU72  
TOM1  
TRHDE  
TXNDC17  
UBALD2  
VPS33B  
ACVRL1  
BMPR1B  
ELOVL7  
EOMES  
HDAC7  
RCC1  
SLC25A3  
TMC6  
BTN3A3  
CIPC  
CYP4A12B  
HHATL  
KLHL32  
LENG1  
MED25  
OAZ3  
PCDHB2  
RASL2-9  
STFA2L1  
TECTA  
ZFP280D

ASIC2  
FOXD1  
GPD1L  
ITPRIP  
LRRK1  
LSM5  
MCFD2  
N4BP1  
NCAPD3  
PCDH8  
RBFOX3  
UIMC1  
WDR45  
YTHDC1  
NCOR2  
RPS6KA5  
ACAN  
ASCL1  
MAGI2  
MED13L  
ZC3HAV1  
AMN  
CCL25  
CENPS  
CEP290  
CEP41  
CGGBP1  
COPZ1  
DMP1  
DPF1  
ENSA  
FAM133B  
FANCB  
GPR87  
GXYLT1  
HPRT  
HSD17B14  
IFT20  
KCNC1  
KCTD10  
LYPD6  
MBOAT7  
MED14  
NCKAP5  
NDUFB1  
NUP35  
RAD1  
RPL35  
RUSC2  
SAMD5  
SH3RF3  
SOCS4  
TMC4  
TMEM177  
TRIM8  
TSGA10  
UBE2Z  
UBR5

UBXN1  
UGT2B5  
UHRF1BP1L  
VPS26A  
XPNPEP3  
ZMPSTE24  
BCAS3  
CDK19  
CTSV  
DNAJC7  
DOT1L  
EME1  
ENPP5  
GABPA  
MCOLN3  
MYBPC3  
MYO7A  
NOL6  
QPRT  
SFMBT2  
TMEM38B  
ZHX2  
ZIC1  
ADNP2  
AHSP  
AKR1C12  
ARHGDIG  
C5AR2  
CEP112  
CMC1  
COL26A1  
DNAJC22  
DOHH  
ENTPD8  
GTF3C4  
HS3ST6  
IFI203  
INSL6  
KIF9  
MEAF6  
MIR494  
MTCL1  
MYSM1  
NUMBL  
OSGEP  
PIGS  
PLEKHG6  
RNF168  
SDK1  
SEC31B  
SLC35A2  
SLC35B4  
SLC6A17  
SMU1  
SOX1  
SRBD1  
SYPL2  
SYT8

TBCA  
TEAD3  
TSPAN11  
TUBGCP5  
ZC3H14  
GRM5  
ADRA2C  
FERMT1  
RBM14  
SEPTIN8  
TRPC6  
BXDC2  
FBP1B  
FSCN3  
KPTN  
PPP1R3F  
WFDC15B  
ZFP707  
ADRA2A  
HSD17B1  
ANKRD49  
B4GALT3  
BCDIN3D  
CTDNEP1  
DDX19B  
DUOXA1  
EML3  
FABP12  
FADS6  
FAM114A2  
HAUS5  
IGHG  
IRF2BP1  
KBTBD12  
LHFPL4  
MFAP3  
NDOR1  
PAKAP  
PAX4  
PM20D1  
PVRL1  
SCAMP3  
SLC6A3  
SNURF  
SULT1C2A  
SZT2  
TMEM175  
YIPF2  
FOXC1  
SSTR2  
VIP  
CLN3  
COL10A1  
EIF4G3  
IMMT  
KLK6  
NOP2  
PEX13

PRSS29  
PXDC1  
SEMA4G  
TMEM19  
TP53INP2  
UNC5C  
WNT1  
ATP11B  
BRI3  
CANT1  
CEBPE  
CPSF2  
DMRT1  
EXOC2  
GNPDA2  
HNF4G  
ISL2  
LGI1  
LRRC40  
MRTFB  
MYBPH  
NAPRT  
NTNG1  
PAOX  
PHLPP1  
PLEKHB2  
PLEKHM1  
PPP4R4  
PRPF39  
RNFT2  
RPH3AL  
SEMA4C  
SEZ6L2  
STON1  
TBC1D2B  
TMSB15A  
USF2  
WASF3  
ZFX  
ADCY3  
ATP8A1  
CSF2RA  
MCC  
MCTP1  
SEMA4D  
AOC2  
ARFRP1  
ATP5MF  
BAHCC1  
BCORL1  
CEP250  
COA3  
CPSF3  
CYSLTR2  
DCLRE1A  
DIMIT1  
DLK2  
EMC3

GEMIN8  
GIMAP6  
H2AC4  
H2-Q10  
H4C14  
KLRD1  
MIPOL1  
NSUN6  
NT5C  
PCID2  
PGLYRP2  
PI3  
RANBP10  
SIGLEC5  
TGTP1  
TLCD5  
TMEM120B  
TMEM168  
TMEM60  
TOE1  
TRIM39  
USF1  
PDE10A  
ANO6  
FAIM2  
GTF2F1  
HLA-DMA  
HNRNPH3  
JADE2  
KCNJ12  
MSRB3  
RCOR3  
RICTOR  
RO60  
SLC2A8  
ATF1  
GABRA4  
NEUROD1  
POLQ  
AGO1  
AKIRIN2  
ARHGEF18  
CDYL  
CLEC14A  
CNOT6L  
CSNK1G3  
CYP2A2  
DUSP26  
FAM117B  
FAM13B  
FAM167A  
GIT2  
IYD  
MINPP1  
NUB1  
PACSIN1  
PLCXD1  
POLR2C

PYCR2  
RCSD1  
REPIN1  
RT1-DA  
SDF4  
SERAC1  
SGTA  
STK40  
TP53I11  
TWSG1  
PAPPA  
PIK3CG  
REN  
ADAM32  
ALG11  
APCDD1L  
CEP97  
DCAF12L2  
FOXD2  
GHRHR  
GPANK1  
HOXD4  
MIR330  
NPRL2  
NUDT22  
NUDT8  
PEA15A  
PECI  
PIGB  
RBSN  
RTF1  
SCD3  
STAG3  
TANGO2  
TBC1D10B  
THAP3  
TRIM7  
ALK  
CCL1  
PTPRZ1  
CDH8  
DUSP7  
GNL3L  
H2BC4  
IGSF9  
KANK2  
MYOCD  
NOD2  
NPM3  
SEPTIN6  
STING1  
UFM1  
ZBTB4  
ZSWIM6  
ADARB2  
ARHGEF25  
BBS1  
BMP15

C11ORF54  
DDX28  
FAM20B  
GGT7  
GNG3  
HGH1  
IPO11  
MCTP2  
MFSD11  
MRI1  
MTX2  
NEUROG1  
NKX6-1  
PIGZ  
PITPNM2  
POFUT1  
PRDM4  
PRPSAP2  
RAB11FIP5  
RANBP6  
RSPO1  
SGIP1  
SLC25A17  
SLC35F3  
SLC45A2  
TMEM161A  
TNFRSF18  
TNPO2  
TSPAN9  
UGT2B15  
USP22  
VEZT  
ZFP423  
ANKRD23  
CAPN11  
DDR2  
FIS1  
HSP70  
LMAN1L  
SERPINB12  
TEX12  
TRP53BP1  
APTX  
ASCL2  
ATP5F1E  
CAMSAP2  
CBLN1  
CCDC69  
CD19  
CD5  
CNPY2  
DNPEP  
FABP10A  
FAXDC2  
KIRREL3  
MIR132  
MMS22L  
NDP

PAQR5  
PDAP1  
PLA2G12B  
RHOF  
RIMS2  
SFT2D2  
SIX4  
SLC7A10  
SNX4  
SPATA18  
TAMALIN  
TOMM40L  
TRAPPC9  
TSPAN31  
UBA2  
ATP6  
RPS10  
SLC17A7  
SLCO4C1  
CCNT2  
CRLF1  
LMO2  
OLA1  
OSER1  
RBM12  
SDC3  
SOAT2  
TRPC3  
B4GAT1  
CCDC59  
CCR9  
CNPY3  
COMMD5  
COMMD6  
DCTN5  
FAM110A  
FKRP  
GABRG3  
GARS  
GLRX5  
GPR153  
GRAMD4  
GTF2H4  
HECTD4  
INTS3  
IRGM1  
LPIN3  
MTMR2  
NAGPA  
NIPAL1  
NRROS  
P4HA3  
PDE6C  
PGGHG  
PIGM  
PLBD2  
RABIF  
RAET1B

RIPOR1  
SLC25A14  
SMARCD1  
SNX14  
SRFBP1  
STK25  
TAF3  
TAL1  
TASP1  
TMEM132D  
TMEM41A  
TRMT11  
TRUB1  
UNCX  
ZMYND12  
AKAP7  
ARHGAP28  
ATL1  
CENPL  
CPNE4  
CXCL15  
CXCR3  
DTWD1  
FAM53B  
FCGBP  
HOXB2  
IGDCC3  
IMP3  
INPP4A  
KRR1  
LANCL1  
MC1R  
MED20  
MIR99A  
MMGT1  
MRPS18C  
NAA10  
PRPF38B  
PRRG1  
REC8  
SLC15A1  
SRSF4  
STRIP2  
STXBP1  
TRPM2  
VTCN1  
ZADH2  
ZKSCAN1  
AFG3L1  
ANO7  
CBX8  
CCDC22  
COMMD2  
CYB561A3  
DALRD3  
DDX49  
EEFSEC  
EMC4

GMEB2  
GTF2E1  
INO80  
INTS1  
ISCA2  
JTB  
MIR455  
NOM1  
P2RY13  
ROM1  
SS18L1  
SVBP  
SWI5  
TBC1D13  
TMED6  
TRMT112  
UGT2B11  
ZMAT5  
ZSCAN21  
ABCG2A  
LINCR  
MIR301A  
ZFP335  
CA4  
GDI1  
H4C8  
HAPLN1  
IRX1  
PNPLA7  
SREK1  
TBCD  
TIGAR  
DRD2  
NSF  
GALR3  
MIR181D  
MIR708  
MS4A4D  
TMEM178B  
TTC7  
ZNF574  
A4GALT  
ABCD1  
ADAMTSL2  
ARCN1  
ARFGEF1  
CCNB1IP1  
CCNY  
CDH23  
CLDN10  
DCTN1  
EIF3D  
ELAC2  
FBXO11  
GFRA3  
GPRIN3  
H1-3  
H3C1

IL9  
MIA3  
MLXIP  
PADI4  
PLXNA3  
PTPRH  
RNF114  
SLC25A16  
TP53BP2  
USP24  
ATP5H  
EPHA7  
FKTN  
INSL3  
LPAR3  
MIS18A  
NPPC  
SLC13A4  
SPATS2L  
TFEB  
WNT7A  
ANGPT4  
ASPSCR1  
BRF2  
CCDC93  
CD7  
CDC40  
CDK5RAP1  
CLNS1A  
CNIH1  
CPN2  
CUTA  
DACT3  
EIF3G  
EMID1  
FHOD1  
GALNT14  
HOXC9  
HVCN1  
KANSL1L  
KCNQ1OT1  
LHX4  
LSG1  
LY6G6C  
MAB21L1  
MIRLET7B  
MRPS36  
NGDN  
NPAS3  
OLAH  
PAQR3  
PBDC1  
PELP1  
POP7  
PURG  
RAB7  
RBM7  
SLC24A2

SLC39A13  
SLC66A3  
SMIM1  
SPSB2  
SYCE2  
TMBIM6  
TMEM160  
TNNI1  
TPSAB1  
WDR7  
LNPEP  
OSM  
ASB10  
ATG4D  
ATP5O  
CCDC106  
H3F3A  
MAST1  
MYL10  
MYO18B  
NAT9  
PIANP  
PIGY  
RANBP3L  
REM1  
RING1  
RTL8A  
TLE6  
TMED8  
ULK3  
ZNF189  
ADCYAP1R1  
FGGY  
FHOD3  
NACA  
PITX2  
RTN1  
SLC29A2  
ACAD10  
ANKFY1  
AP1S3  
CENPT  
CHRNA1  
CTPS1  
DDX3Y  
DGCR8  
DPP6  
ECM2  
GIP  
HOXD1  
ITGBL1  
KDM4A  
MAPRE2  
MGAM  
MIR125A  
NIPAL3  
PEX6  
PHC3

PSMG1  
RAP2A  
SELENOK  
SLC19A3  
SPIN4  
TASOR  
UGT8  
VPS45  
WSCD1  
DIDO1  
KIF1A  
SRD5A2  
ACKR2  
AHDC1  
AICDA  
APOL1  
ARID3B  
ATP5L  
CDC23  
CDH7  
CNOT8  
COA7  
COPS7A  
COQ2  
ENOX1  
FOXN4  
GPR180  
GTF3C6  
IL11RA1  
INO80C  
INPP5J  
ITFG2  
KCNC4  
MDFI  
MICU3  
MMP28  
N6AMT1  
NOS2A  
NOSIP  
NUBP2  
OCIAD1  
PKN3  
PLEKHA7  
PLXNA4  
PPFIA3  
PPT2  
PTOV1  
RAB1B  
RFXANK  
RNF187  
SDR42E1  
SENP5  
SERF2  
SHBG  
SHPRH  
SNAI3  
SPOCD1  
TLNRD1

TMEM51  
TSPYL1  
ZC3H7A  
APEH  
CNKSR2  
HLA-DQB1  
MBOAT1  
OPRL1  
SFXN3  
SLIT1  
LONP1  
ADGRL4  
ARGLU1  
ARHGAP19  
CDC42BPB  
CLK3  
CTSO  
ELF2  
FAM13C  
GYPA  
MRPS27  
MYBPC1  
PLCL2  
RALB  
RBKS  
REXO2  
RHBDD2  
SLC7A9  
STX1B  
THEM6  
TRDN  
ZBTB44  
ASB8  
CYP2C67  
FAM167B  
MOV10L1  
OTOP1  
PCDHB5  
RTL8C  
S100Z  
TREML4  
VAX2  
VPS9D1  
ZNF552  
ADGB  
AKR1E1  
MUP21  
NOTCH1A  
RTF2  
ABCC12  
ATP5F1C  
BAHD1  
COX14  
CRIP3  
DANCR  
DUS1L  
DXO  
FAM118B

FBRSL1  
GLRA3  
GZF1  
KCND1  
KHDRBS2  
LIPF  
LRTM2  
MRPL21  
PARD6A  
PIGV  
PLPPR2  
PRAF2  
RECQL5  
RT1-BA  
RUSC1  
RWDD3  
SIRPB1  
TXNDC12  
UBE3B  
UNC93A  
WDR48  
ZFP395  
CAVIN1  
IRF2BP2  
ADAMTS6  
AGBL2  
ALG8  
ARL2  
CADM4  
CCT4  
CD248  
CELSR2  
DGKD  
DNASE1L1  
DRAM2  
DTX3  
DUSP22  
EDIL3  
ERGIC3  
FAM210B  
FBXO33  
FLOT2  
FMNL1  
GNG12  
GRSF1  
GSC  
L3HYPDH  
LMBRD2  
LONRF1  
MCPH1  
MEGF8  
MFSD10  
MIR15B  
MOS  
MYOZ2  
NEIL2  
NFXL1  
NOTCH4

PEX2  
PHF2  
PLD6  
POLRMT  
PPFIA1  
PPP1R12B  
PRKRIP1  
RIOK1  
RNASEH2C  
RNLS  
SCRIB  
SLC9A6  
SYF2  
TBC1D2  
TMEM150C  
TUBB1  
UBE2L3  
USP46  
WDR35  
ZNRF3  
ZRSR2  
AEBP2  
ATP2C1  
BBS9  
BNIP2  
CTBS  
FBXL5  
HERC4  
ITPRIPL2  
ITSN2  
LAMTOR3  
MALL  
MSRB1  
MST1R  
N4BP2  
NOP16  
NPEPL1  
PDE4C  
PHYHD1  
PPP4R3B  
RAB3C  
SFXN5  
SIRT4  
SLC9A7  
TRPM8  
VPS37B  
WDR46  
WDR72  
TNFSF4  
CALB1  
CCL17  
FIBIN  
MYOG  
RPLP1  
RPS12  
ABCB5  
ACSF3  
ANKRD16

APOBEC3G  
ARHGAP27  
ATP1A4  
CAPN9  
CCDC124  
CCDC91  
CLK2  
CRB3  
CSDC2  
CSNK1G2  
CSRNP2  
CWC25  
CYP2C68  
CYP2J4  
DCP2  
DMAP1  
EN1  
F13B  
FCRLA  
FGF17  
FTSJ1  
GDPD2  
GPR65  
HSBP1L1  
IFT81  
IQCD  
MAGIX  
MAZ  
MED11  
MINDY3  
MIR342  
MLANA  
MPHOSPH8  
MPV17  
MRPL54  
MS4A6C  
OLIG3  
OSBPL9  
PADI1  
PIGW  
POMGNT2  
PRR7  
PWWP2B  
RAB12  
RAET1C  
RGL3  
RIOX1  
RNASE2  
RNASE6  
RPAIN  
RPRD1B  
SF3B2  
SHTN1  
SPHKAP  
SPRR3  
TMEM131L  
TMEM167A  
TMEM184B

TMEM50A  
TMEM59  
USP19  
USP45  
WDR32  
WDSUB1  
ZC3H15  
ZMYM4  
ZNF503  
AKR1C4  
CALM3  
ANKHD1  
ARHGAP17  
ATP6V1G1  
BPNT1  
DCX  
EVI5  
FNDC4  
GKAP1  
GPR183  
ING1  
L2HGDH  
MCUB  
NAPG  
NRM  
POLR2F  
SPIRE1  
SV2B  
VWA5A  
ZNF652  
ERAL1  
EVX1  
HHIPL1  
KCNK15  
PDILT  
SAMD4  
TRIM68  
TULP2  
ZFP276  
ZKSCAN8  
CLMP  
ELK4  
OBSL1  
PEG3  
RGS9  
SFTPC  
JMJD1C  
ANKRD9  
C1GALT1  
EIF5A2  
GABRA3  
GALNS  
GDF6  
HAX1  
IRX4  
KCNJ4  
KCTD5  
MBTD1

METR  
MFSD4A  
NCS1  
NPLOC4  
NUP205  
RIMS1  
SALL2  
SETX  
TAF4B  
TLK1  
ACBD7  
ARHGAP12  
BCAS2  
BRWD3  
COIL  
CYP4F4  
DDX50  
GNAT2  
GPX1A  
H2BC6  
IARS2  
KIF13B  
LCT  
LMAN2L  
LRCH1  
MAPK15  
MRPL15  
MRPL51  
MYDGF  
NDST2  
NOL9  
NSMCE1  
PDXDC1  
PI16  
RASSF9  
RPRD1A  
RPS6KA4  
SIPA1L3  
SLITRK5  
SNAPC5  
SSBP4  
SYNGR2  
TMEM125  
FBL  
RAI1  
RECQL4  
TMEM106B  
KCNH2  
ACPP  
BRDT  
CCL15  
NUPL2  
RARS  
TBPL2  
CHGA  
ADSS2  
ARMC10  
ARMCX4

B3GAT3  
BBS5  
C1ORF116  
CTSW  
CYP4F5  
FMNL3  
GDAP2  
H2BC10  
HINFP  
IFT22  
KY  
MAP1S  
MDGA2  
MIR184  
MKX  
NCR1  
NPY5R  
PDCL  
PRPF40B  
PYGO1  
RPU3D3  
SCGB3A1  
SH3BP1  
SLC24A1  
SMG6  
TBC1D12  
WNT9B  
ZDHHC5  
ZNF143  
HTR1B  
CHRNA2  
AMH  
ABCA8  
ASH1L  
CD46  
DENND5A  
ENY2  
EPHB3  
FBXL4  
HSD17B8  
INPPL1  
LENG8  
MOSPD1  
OPCML  
PHF1  
PHTF1  
RASEF  
RPS26  
RPS29  
SLC12A6  
XPR1  
GRIA2  
ABRAXAS2  
ARXES2  
ATP5K  
B3GNT8  
CCDC82  
CDC42SE2

CEP83  
COA6  
COL22A1  
COL9A3  
CRNKL1  
DGKB  
DHX36  
DRAP1  
EFNA4  
FAM178B  
FAM78A  
FBXL15  
FGD5  
GJC3  
H4F16  
HHIPL2  
HOXC6  
HSPA14  
IMMP1L  
ISM1  
LY6G  
MRPL14  
MRPS22  
MSL2  
NALCN  
NDEL1  
NSMCE3  
NTN3  
NXPE4  
PEX12  
PNLIPRP2  
PRDM8  
RBFOX1  
REXO4  
RHBDL2  
SCAF8  
SERPINA1E  
SLC26A3  
SLC35E4  
SLC4A8  
SLFN4  
THAP1  
THOC3  
TIMM22  
TMEM238  
TSFM  
TUT7  
UBIAD1  
UROS  
UTP14A  
WDR83OS  
WWP2  
CYTB  
ABHD16A  
ANAPC13  
AP5Z1  
ARL11  
ASCC2

ATP9B  
CFAP251  
CYS1  
DNAJC13  
FBXL12  
GAB3  
HNRNPUL2  
ILKAP  
IRGM2  
LRRC45  
MBIP  
MIEF2  
MPP4  
MS4A6B  
MTIF3  
MTX1  
NAA30  
NOL12  
NYNRIN  
PDZD11  
PRDM13  
RARS2  
RP9  
SEC14L3  
SLC27A6  
SLFN2  
SOX14  
SRPK3  
TAF10  
TAF12  
TMA16  
TMEM68  
TUBG2  
YIPF6  
ZDHHC18  
ZNF22  
ZNF473  
AP3D1  
CPA4  
DOCK11  
F9  
NMNAT1  
RAB17  
SSR2  
TENT5B  
AIP  
AMDHD1  
AMMECR1L  
AMZ2  
ATP5A1  
B3GALT5  
B3GNT7  
CCL28  
CDH10  
CORO1B  
DHRS11  
DOCK6  
ENOSF1

FMC1  
FO XK1  
GPIHBP1  
GTF3C1  
HCRTR1  
ITFG1  
KCNJ13  
LPAR4  
MAML2  
MIF4GD  
MIS12  
MRPS31  
MYPN  
NMD3  
NTPCR  
NUP85  
NXPE3  
PTPN7  
RAB21  
SCUBE1  
SIGIRR  
SLC26A11  
SLC35A3  
SLC5A11  
STAP2  
STRADA  
THAP11  
THUMPD3  
TMEM154  
TYSND1  
WWC3  
YIF1A  
HLA-DRB1  
PLD2  
RBM25  
SETBP1  
EMILIN1  
GEMIN4  
HECW2  
KCNS3  
LRRC17  
MGARP  
RIMS3  
SNX5  
STXBP2  
TTC28  
U2AF1  
UGT2B4  
XPO5  
LRIT2  
SECTM1A  
SNORA74A  
VPS24  
ACOT6  
AFG1L  
AP4B1  
BPIFB1  
CISD3

CLBA1  
CNOT10  
CPSF4L  
EDC4  
FOXL1  
HLA-DRB5  
ISOC2  
KLHL20  
LRCH3  
METTL26  
MINDY4  
PSKH1  
RWDD4A  
SNX22  
SVOP  
MIR181A2  
DCC  
HSPB11  
ITGB1BP3  
LCA5L  
LRPPRC  
SCARNA6  
SLC1A6  
TARS1  
WDR21  
ZFP54  
ADPRH  
ASB4  
BTN3A2  
COX20  
DCTN2  
DLX6  
ECSIT  
FAM219A  
FUT2  
GIT1  
GNPTG  
H2AC13  
HOXB13  
KLC3  
KLHL18  
KRT75  
LGI2  
LNPK  
MATN1  
MCM3AP  
MTMR12  
NOVA2  
OLFM3  
PEAK1  
PHF23  
PLSCR3  
RPP30  
SFSWAP  
SLC26A10  
SPNS1  
SUCCO  
TAB1

TMCO3  
WDR37  
XKRX  
ZCCHC10  
ADGRB2  
AKAP10  
ALS2CL  
ARHGAP9  
BABAM2  
CCL27  
CLINT1  
DAZAP2  
DOCK1  
DOK3  
GEMIN5  
GJB6  
GXYLT2  
HEATR3  
IQCG  
KLHL23  
MEP1B  
MPP5  
MYO1G  
NAT10  
PAX2  
PCYOX1L  
PDSS2  
PHC1  
PLPP6  
RFLNA  
RT1-BB  
SAE1  
SARNP  
SLAMF7  
STX6  
TMEM54  
UBE2V1  
XIRP1  
ZFC3H1  
CRHR1  
VTG1  
ACVR1C  
BATF3  
CHIC2  
H1-10  
HS3ST3B1  
SH3BGR  
TCF25  
PPP3R1  
ADAT2  
ANKRD50  
ASB1  
CDC26  
DCHS1  
DYNC1I2  
EDEM3  
ESCO1  
HCN2

HSBP1  
IL17RD  
INTU  
KCNK10  
LMBR1  
LRRC8A  
LY75  
MFAP3L  
MTHFS  
MTURN  
NDUFAF1  
NUDT16L1  
PSCA  
PTGES3  
RAB11FIP4  
RFX7  
SCML1  
SRP68  
TMEM67  
TWF1  
UGT2B10  
VAC14  
XYLB  
ACSM2A  
ADAMTS8  
ANKLE2  
AP4E1  
ARHGAP30  
ATP6V1B1  
ATP6V1G2  
AVL9  
C3ORF52  
CAMTA2  
CARF  
CCDC71L  
CRB2  
CSTF2T  
DCAF4  
DNASE2B  
ELAVL4  
FEM1A  
FRAT2  
FUNDC2  
GATB  
GYG2  
HENMT1  
KCTD11  
KLK2  
MBD6  
MDP1  
MEA1  
MLST8  
MTHFSD  
PLEKHA8  
PTDSS2  
RAB5IF  
RIMKLA  
RNPEPL1

RPRD2  
SCAF1  
SCARF1  
SLC37A3  
SRSF9  
STK16  
STX5  
SUN1  
THOC6  
TMEM267  
TNFAIP8L3  
TTC8  
UHRF2  
VPS72  
WDR59  
ZSWIM4  
GNRH1  
MID1  
ACBD6  
CFAP74  
CPLX3  
CUL9  
CYP2D10  
CYP4F22  
FOXN1  
GIMAP7  
LYRM4  
NCCRP1  
NT5C3  
RLBP1  
RPAP2  
RPP14  
RPUSD1  
SIAH1A  
SIT1  
SLC25A48  
SLC38A11  
TAS1R1  
TEX11  
TMEM127  
TSPYL5  
UTF1  
UVSSA  
VPS26C  
ZFP68  
ZNF580  
OPRM1  
ELOC  
IRAK4  
KCNE1  
MMAB  
ND2  
SCN2A  
TIRAP  
ANKMY1  
CNGA3  
CYP2D12  
LCN8

MIR106A  
MIR702  
NKX2-6  
TMEM254A  
XLKD1  
ZNF70  
CLDN11  
GRIN2C  
HTR7  
ADCY10  
ALDH16A1  
ARHGAP35  
B3GAT1  
BEND5  
BLOC1S6  
CACNG6  
CALCR  
CASP14  
CDKN2AIP  
CLPB  
CNOT7  
CPNE5  
D2HGDH  
DDX11  
EIF3E  
ENPP4  
EXOSC9  
GPR88  
ICE2  
LTB4R  
NECAB2  
PDS5A  
PEX1  
PGC  
PHF3  
PHKA1  
PIGN  
PLCXD2  
RIOX2  
RTTN  
SGCG  
SHC3  
SRGAP1  
TBX15  
TNS4  
TOMM7  
VPS53  
ALG6  
ASB5  
ATP5E  
CHST9  
CNIH3  
CNOT9  
COG7  
CPA5  
CRISPLD1  
CSN3  
DAZAP1

DCUN1D5  
EID2  
FN3KRP  
GMIP  
HEATR6  
JCAD  
KCNF1  
KLHDC3  
LMTK2  
MIR196B  
MTCH1  
MTMR9  
MTO1  
NKX6-2  
NOC4L  
PCED1B  
PCSK7  
PDPR  
PNMT  
POLR3F  
RAD51D  
RGS13  
RNF126  
SERPINB6B  
SLC35F1  
SNRNP27  
SORCS1  
TMCO6  
TOMM22  
TRAPPC2L  
TTC13  
VAMP3  
VPS4A  
WDR31  
ZMYND19  
ZNF593  
AHNAK2  
BRD8  
FAT4  
FGF5  
LIMS2  
NAP1L5  
SULT1A3  
TMEM50B  
ACKR1  
ANKRD42  
ASXL2  
B3GALT4  
CCDC57  
CILK1  
COPG2  
CRISP2  
DAB2IP  
ENAM  
ENTPD4  
EVI5L  
FAM83G  
FBXO44

FUT10  
GGA1  
GRM8  
HASPIN  
HTRA4  
IGLL1  
INPP5K  
KRT71  
LRFN4  
LSM11  
MOG  
MS4A4A  
NCBP1  
NEUROG3  
NHSL2  
NSMAF  
OSTF1  
PCDH19  
POC1B  
PPP4R3A  
RABL2A  
RFX1  
RNF208  
ROBO4  
RPS23  
SEC24A  
SELENON  
STX16  
SYNGR3  
TACO1  
TBC1D22B  
TMEM234  
UNC5A  
UTS2R  
VANGL2  
XIST  
ZBTB18  
ZCCHC12  
ROBO2  
ARF4  
ARL1  
COX8B  
KDM6A  
MUC5B  
NTSR1  
SMCHD1  
TESC  
ACKR4  
ACVR1B  
AP3B2  
ASNSD1  
ASPHD1  
CCDC28A  
CCHCR1  
CTNNA3  
DCTN3  
DDX31  
DDX4

EDRF1  
FAM161A  
FAM81A  
GPKOW  
GPR135  
HCP5  
HOXA4  
KCNMB1  
KCTD13  
LOXL3  
MAML3  
MARCHF8  
MED7  
MIR98  
MRPS11  
NFU1  
NOMO1  
PEF1  
PGBD5  
PHAX  
POLL  
RAB11FIP2  
RDH14  
RFXAP  
SCML4  
SERPINA1A  
SH3D21  
SMCR8  
SNX17  
SNX18  
SORCS3  
SRP54  
SSTR4  
STK32C  
SYN3  
TCTA  
TDRP  
TTC26  
YDJC  
ZBTB17  
CNTN1  
TNIK  
BCL9L  
CEP350  
CREB3L4  
DPP8  
EPX  
FAM168A  
FHL3  
FZR1  
GPR39  
LAMC3  
LMO3  
MIR27B  
PAK4  
PDE12  
PEX7  
PRTFDC1

RABEP1  
RBM38  
SLC36A1  
SLU7  
TBC1D16  
TIMM44  
C2ORF76  
CHADL  
CHES1  
DCUN1D2  
KIAA1522  
LDOC1  
NKX1-2  
PMFBP1  
RELCH  
SARS  
STFA2  
UPK2  
VAX1  
ZFP110  
NONO  
RPL21  
DRD1  
CACNG5  
CFAP36  
CHST13  
DNASE1L2  
DNASE2A  
ER  
GCNT4  
IFFO1  
INSM2  
LAMP5  
LINC00261  
MIR152  
MUP4  
PBX4  
RHBDL1  
RSPRY1  
SHF  
SLC25A40  
SNUPN  
TANGO6  
TFPT  
TRARG1  
TRMT10B  
UNC119B  
ZNF507  
ASTN1  
ATG4C  
BLOC1S1  
C15ORF39  
CACNA1S  
CBFA2T2  
CCNJL  
CHIT1  
COG6  
DNAAF1

DNAH2  
DNAJB13  
ELMO3  
ELMOD2  
FAM149B1  
FAM32A  
FAT2  
FDX2  
FUT11  
GIN1  
GPATCH8  
GPI1  
HBA-A2  
IL20RA  
INTS2  
IRS3  
JKAMP  
KEL  
KHNYN  
LMF2  
MAFA  
MAP3K7CL  
MRPS10  
MYLK2  
NT5DC1  
NUP43  
PPP1R7  
PTPN4  
RAB3GAP1  
RARS1  
RNF130  
RWDD2A  
SCAI  
SELENOF  
SIRT6  
SLC6A20  
TAGAP  
TMEM170B  
TRUB2  
TUBA3A  
UBXN7  
WARS2  
WBP1L  
ZBTB22  
ZNRD2  
ZSWIM5  
ZZEF1  
BRD4  
ARHGAP15  
ARID3A  
BTK  
CDK10  
CDK13  
COX7A2L  
GNPAT  
GSDMD  
IAPP  
KAT2A

MVB12B  
NAPB  
PHLDB3  
PRKD2  
SHROOM2  
SLC35A1  
SLC35E1  
TAOK2  
TDGF1  
TXNDC5  
ZIC3  
CD3G  
DRD5  
GNB2  
IL22  
KCNMB4  
SLC17A5  
SUGCT  
GRM1  
MAPK12  
CCNI  
EPHA3  
SUB1  
TGOLN2  
UBE2J1  
AAK1  
ACOX3  
CLN5  
CMKLR1  
DISP1  
FGF15  
KIF3C  
MYCT1  
POLG  
PPP1R1C  
RAB3IL1  
RAG1  
SENP1  
ATP5MG  
AURKC  
B3GALT6  
CALHM2  
CUEDC2  
DDX41  
DNAH5  
DOK6  
EFCAB7  
EIF4A3  
FCGR1A  
GPR27  
GPX5  
HAPLN4  
HEXIM2  
IL5RA  
INPP5E  
KCNK12  
MDH1B  
MIR204

MIR20B  
MIR25  
MYL6B  
NBEA  
NEMF  
ORAI2  
ORC3  
PDZD8  
PHOSPHO1  
PIP4K2C  
PKD1L2  
PLGRKT  
POGZ  
PPP6R3  
PROM2  
RAPGEFL1  
SAFB2  
SLC9A9  
SNX13  
SPAG6  
SSTR5  
SYT5  
TAPBPL  
TCF20  
TLCD3A  
TMEM156  
USP21  
ZNF704  
ATP6V1E2  
BCL7B  
BMP8A  
C1QL1  
CLPS  
CLRN3  
CRACDL  
CYP3A41A  
FCSK  
GSG1  
H3-3A  
HAUS3  
HOXC4  
INO80B  
KCTD2  
KDM3B  
LMOD3  
LRRC51  
METTL15  
MIR133B  
NPIPA1  
OTUD3  
POC5  
RAET1E  
RBM45  
SDR39U1  
SNAP47  
TDP2  
TGM4  
TMEM132C

TSEN34  
ACCS  
ATP5G2  
CD209F  
CD59A  
CRAMP1  
CYP4F13  
EAR2  
HIF1AL  
IFI205  
KLK9  
LY6G6E  
NMUR2  
POU6F1  
SRRD  
ZDHHC19  
ZFP523  
ZFP750  
LRRK2  
BTNL8  
CCDC84  
CD101  
CTRB1  
GBP11  
HOXD12  
HSF5  
KRT32  
METTL2  
MRC2  
N4BP2L2  
NOL1  
SLC2A12  
SPN  
TBC1D15  
ZFP511  
ARHGEF10  
ATP6V1C2  
BSN  
CACNB4  
CD247  
COMP  
GPBAR1  
H2BC8  
IP6K1  
KCNIP4  
KMT2E  
MAN1C1  
MIR192  
MPV17L  
NLGN1  
URI1  
ANO4  
ARSI  
ATP23  
B3GALT2  
COG5  
FAM120C  
FAM169A

FERMT3  
GBF1  
GPAA1  
H2BC11  
HAPLN3  
IDO2  
IKZF5  
LSM7  
MCRS1  
MED12  
MIR375  
MPDU1  
NAA20  
NSMCE4A  
PAEP  
PIN4  
RABEPK  
RT1-DB1  
SLX4  
SNW1  
TBKBP1  
ADRA1D  
SLC15A2  
APOBEC3B  
CACNA1I  
SEC14L2  
SMARCE1  
TDP1  
TENM2  
ADH6-PS1  
ADAT3  
CATSPERD  
COQ8B  
CROCC  
EAPP  
EMC2  
FLT3LG  
FSD1  
HS1BP3  
KANSL1  
KBTBD3  
KCNJ9  
LCLAT1  
MINDY2  
MRPL28  
MRPS23  
NEK8  
NSUN3  
OLFM2  
PIK3R4  
PRR5  
RNF135  
RNF40  
SCGB1D2  
STX18  
SYNDIG1  
SYT10  
TBX19

UBXN10  
YBX2  
ZC4H2  
ZNF622  
ZNF697  
SPRY2  
ADGRF5  
BCL2L10  
CORO7  
FOXF2  
MAB21L2  
MRPL1  
PTPN5  
RAB3IP  
RAC3  
RPL18A  
SCN4A  
SNX8  
USO1  
ZC3H6  
CHRM1  
HES5  
MTDH  
PRKCSH  
TINAGL1  
ANKRD6  
ATP4A  
CACNG2  
COQ6  
DARS1  
DHDH  
DNAH8  
DR1  
FAM136A  
GDAP1  
H3C2  
ISLR2  
JAGN1  
KIF3B  
MAP3K10  
MYRF  
NHS  
PDCD7  
PHYKPL  
PSMD9  
RANBP9  
SLAMF1  
SPTLC1  
UTP25  
ZC3H7B  
ADAMTS16  
C19ORF12  
CAR11  
KCNA7  
LIPN  
LRRC10  
MUL1  
NACAD

NAT8B  
NXPE2  
PDE6G  
SCRT1  
PTPN2  
ANKRD22  
ATXN2L  
CHST2  
CRHR2  
DENND1B  
H2-AA  
HPCAL4  
INTS7  
ITPRID2  
MIR210  
NSL1  
RASGEF1B  
RBM15  
S100A3  
SEMA4B  
SLCO1B3  
CARS1  
DTNA  
NFATC4  
ADAMTS14  
AURKAIP1  
BUD23  
CCDC17  
CDK3  
CLDN18  
CMYA5  
CST8  
DHX32  
DHX57  
DNAH6  
DUSP15  
DYNLT2B  
EEF1AKMT2  
EIF2S3X  
EMILIN3  
FLRT1  
FRG1  
FUT9  
GFRA4  
H3C8  
KIAA0040  
MIR191  
MIR425  
MYG1  
MYH7B  
ND4L  
NPB  
RHAG  
SMG5  
SRRM3  
SURF2  
TEKT1  
THAP7

TIMD2  
TMPRSS15  
TRAPPC2  
VCPKMT  
VPS18  
WASHC5  
ZBED1  
ZBTB48  
ZC3H18  
ZFP638  
ADAP1  
BLK  
CMAS  
COA5  
CRYBA4  
CSRNP3  
CTRL  
DSCAML1  
ELP6  
FHDC1  
GPC5  
H2AC8  
HARS  
HCFC2  
INAVA  
LRRC41  
MCMBP  
MED23  
MIR142  
MIR34B  
MRE11  
MSL1  
P4HTM  
PABPC1L  
PCSK1N  
PRL2C3  
RMND1  
SHOC2  
SLC12A9  
SV2C  
TMEM79  
TTLL3  
UPK1B  
ZBTB26  
ATP6V0A2  
CCL26  
CDK5RAP2  
CMA1  
CUBN  
ERI2  
GUCY2C  
H2AJ  
H4C9  
IL27RA  
KBTBD8  
MPP2  
NEURL3  
PIAS2

PPP1CC  
SLC2A13  
SLC6A11  
ST8SIA2  
TRANK1  
UNC45B  
ES1  
FERD3L  
KRT28  
PHLPP  
RAPGEF2  
RNF113A2  
SLC22A28  
TCAP  
THA1  
WDR93  
IL4RA  
BMYC  
CAAP1  
CYP2B7P  
FLACC1  
HOXC8  
IRX6  
KCND2  
KLHL36  
LUZP2  
NECAB3  
PCDHB15  
S100A12  
SATB2  
SULT3A1  
TNP2  
TPSG1  
TRP73  
ZFP219  
ZFP644  
ZNF787  
ZPBP  
AK5  
ARAP3  
ARL5A  
ATP5PB  
BICD1  
CEPT1  
CHRNA3  
EFHC1  
ERF  
GJB3  
MRTFA  
PCGF5  
PHACTR1  
RYS3  
SLC16A14  
THEMIS2  
VANG1  
ATP6V1E1  
ATXN7  
CDKL5

CHMP1B  
CNTN3  
CPNE1  
DERL2  
DIPK1A  
DLX3  
ERLIN1  
FAM214B  
FRS2  
GPR137C  
H1-5  
MCHR1  
MGME1  
NANP  
NCLN  
NETO1  
NLRC4  
PI4K2A  
RPS6KB2  
SARM1  
SERTAD3  
SH3TC2  
SLC16A8  
SYNE3  
SYT9  
TP53TG1  
XYLT2  
ZNF367  
ABHD17C  
ADGRB3  
ANTKMT  
BCAS4  
BLOC1S5  
CD96  
CHST5  
CRYBB1  
CYP2C65  
DNAJC4  
EFCAB14  
ENPP7  
EVPL  
EXOG  
FAM83A  
FAM8A1  
FGF16  
GPR173  
H2AC15  
KATNAL2  
KCNH7  
LRRC3  
LTK  
MAPK8IP2  
MIR23B  
P2RX6  
PCIF1  
PLA2G2E  
PPP1R3A  
SAMD4B

SP8  
TELO2  
TMEM63C  
TTLL11  
TUBGCP6  
UBE2Q1  
USH2A  
UGT1A3  
GNRHR  
COPA  
DOCK7  
EFNA3  
FAT3  
SOS2  
TBC1D14  
SCN5A  
BVES  
C1RL  
CA5A  
CDH16  
CHD8  
EXOC7  
FAM117A  
GRIN3A  
HUS1  
KRT34  
KSR2  
P2RX3  
PATZ1  
PDE6H  
PFDN1  
PINX1  
PLD5  
PLEKHG2  
RAD54L2  
SEZ6L  
SFI1  
SVIP  
TLL1  
UHRF1BP1  
WBP2  
WDR74  
ZBED3  
ZFAND3  
ZFAT  
PIMREG  
ROR1  
SCT  
ABHD8  
ARHGAP39  
B3GLCT  
BIN3  
C1ORF54  
CAPS2  
CHPF2  
DDX47  
DIRAS2  
DSCAM

ELOF1  
ENKUR  
GALNTL6  
GNMT1  
GTF2IRD2  
KCNH5  
KLK7  
LRRC23  
LRRC4B  
LY9  
MARCHF4  
MED26  
MTMR3  
NSUN7  
OFD1  
PYHIN1  
RPAP1  
RUSF1  
SEBOX  
SLC35A5  
SMPD4  
SPPL3  
TBC1D22A  
TM9SF1  
VIPAS39  
VPS25  
WDR5B  
WFDC21  
WRNIP1  
ZC3HC1  
ANKRA2  
CYR1A  
DNAJA3  
FTO  
GRIK3  
KCNH1  
POC1A  
PUB  
RAB11FIP1  
SLC22A9  
VTG2  
APOE  
ASTE1  
CCDC184  
CFAP97  
CRYGN  
GSDMC  
H3F4  
ICOSL  
IGLV1  
KCNS2  
MC5R  
MIR149  
MTFR1L  
NAIP2  
OAS1B  
PPF1A2  
QPCTL

SAMD14  
SELENOO  
SLC22A27  
SLURP1  
SMIM22  
SPEF1  
SPRR2E  
T  
TP53I13  
TTC21B  
UTY  
ZFP330  
ZNF692  
AWAT2  
C20ORF204  
CYP2Y3  
GPIB  
ADAD1  
ALDOAA  
AMY2B  
AZU1  
DEFA3  
EIF2S3Y  
KLRF1  
MIR663A  
MSL3L2  
NOLA2  
PCDHA7  
PCDHB22  
PRG3  
SOHLH1  
SYNGR4  
UBE2U  
YJEFN3  
ZFP414  
KCNJ3  
RPL5  
ACSBG1  
ALKBH8  
ANKRD26  
BOLA3  
CD320  
CHST6  
CPTP  
CRYBG3  
CUEDC1  
EDA  
GIMAP4  
GPRASP1  
H4-16  
IL21R  
JOSD1  
KCNG3  
KLHL14  
LRRN4  
MIGA1  
NPAS1  
P2RX1

PACSIN3  
PARVB  
PEX16  
RAB11FIP3  
RBM20  
RBM22  
RNF146  
RNGTT  
RPL38  
RT1-EC2  
SACM1L  
SAMSN1  
SBF2  
SCLT1  
SHC2  
SINHCAF  
TMEM218  
TRNP1  
U2SURP  
USP48  
AGAP1  
ARFGAP3  
ARID4B  
CETN2  
DIXDC1  
GALNT18  
IRGM  
PLEKHO2  
RAB29  
RBPMS2  
DLX2  
PIDD1  
ACOXL  
AMY1A  
ANKRD55  
BRINP3  
CALR3  
CDHR5  
CELF6  
CLEC4N  
COQ4  
DHDDS  
DNAJB12  
DNAJC11  
FAM50A  
FOXJ2  
H3C10  
ITLN1  
KIAA0930  
LRRC75A  
LRRTM1  
NAA40  
NDUFAF3  
NXNL2  
ORC5  
PAM16  
PCYT1B  
PIGU

POLR2E  
RAB9A  
RBP3  
RETREG3  
RNF139  
RRP8  
RTCB  
SERPINA3C  
SIGLEC1  
SLFN3  
SPIDR  
THOC7  
TMEM63B  
TRIM69  
VSIG10L  
WASHC4  
ZNF467  
ZNF641  
APC2  
ARFGAP2  
ARFIP1  
ATP5ME  
CCSER2  
CHD6  
CNOT4  
DPH3  
EPN3  
ERGIC2  
FOXL2  
HNRNPUL1  
IRX2  
KLHDC8A  
MRPL42  
NAGS  
NOS1AP  
NTNG2  
OMA1  
PAIP2B  
PIP5K1A  
PLEKHG4  
PVT1  
RAB7A  
RAB7B  
ROBO3  
RPAP3  
SNRNP40  
SNX3  
TMX3  
UBN1  
UQCC2  
URB2  
CDC42EP4  
NAA50  
OTX2  
PLCB3  
POP1  
RAB6B  
TEAD4

TNKS  
NPL  
BCL2A1D  
COPS7B  
CYP2A7  
CYP3A43  
DBF4B  
DND1  
FBXO45  
GLTPD2  
H2AC1  
HPSE2  
HSF4  
KATNIP  
LENG9  
LRRC73  
LRRIQ3  
MEI1  
MIR382  
NDUFAF5  
NELFB  
PLAC8L1  
PRSS36  
RXFP2  
SLC10A5  
TMEM179B  
USF3  
SNAP25  
CACNA1H  
RAP1A  
AKR1C13  
ARV1  
ATG2A  
BBS12  
CAND2  
CBY1  
CDYL2  
CERS2  
CHIA  
COG1  
CSN1S1  
CTU2  
CYP2F4  
EDARADD  
FYB1  
GPR108  
GPS2  
GRIPAP1  
GUCD1  
KLHDC9  
MB21D2  
MED31  
MEMO1  
MINDY1  
MINK1  
MIXL1  
MRPL27  
MTMR10

NIPSNAP3B  
NPVF  
PLEKHJ1  
POLR2D  
PRND  
QSOX2  
RHBDL3  
RMDN3  
RNF8  
RNPC3  
SLC25A26  
SLC45A1  
SNRNP48  
SUMF2  
TAF11  
TMEM141  
TRMT13  
TRMT9B  
TYW5  
U2AF1L4  
UBXN11  
UGT2B37  
YTHDC2  
ZBTB8A  
ZMYND10  
ZNF521  
ZNF750  
ZSCAN31  
ZUP1  
ASPN  
ATP5F1D  
FBXL20  
PIK3C2G  
SIAE  
TBX2  
CPNE2  
CREBL2  
DAGLA  
DLL3  
EPHA8  
FAM172A  
FAR2  
GATAD1  
GNPNAT1  
GPR85  
H2AW  
JAKMIP1  
LEPROTL1  
MRPL35  
NMRAL1  
ODF3B  
OLIG1  
PHF10  
PIP4K2B  
PLA2R1  
PPP1R16B  
RAB3GAP2  
RASAL2

SBNO2  
SCAF4  
SCN2B  
SETD6  
SLC28A1  
STK3  
SYNC  
TAF7  
MUP6  
AMY2A5  
ANGEL1  
ANKRD53  
C1ORF198  
CES3B  
CYP3A59  
DLEC1  
GLOD5  
H1F3  
H3C14  
HOXC11  
KCNK7  
MCEMP1  
MIR33A  
NT5C1A  
SLC22A21  
SLC52A1  
TREML2  
TUBA3B  
ZFP281  
CDC42EP2  
CTLA4  
FSTL3  
GNS  
SRGAP2  
ZBTB43  
COL9A1  
CYR1  
DSC3  
DZIP3  
EARS2  
GARNL3  
GINS4  
IL4I1  
ISCU  
KCNJ10  
LNX2  
MICU1  
MTNR1A  
PEX14  
SLC18B1  
SLC35G2  
SNHG8  
STARD8  
SULT1A2  
TMEM209  
TMEM30A  
TRPM3  
WDR18

WNT9A  
AKR1CL  
ATP5IF1  
ATP6V0E  
BFSP2  
CCDC134  
CERKL  
CFHR2  
CLCN1  
CPA6  
CYP4F1  
DMBX1  
EEF1AKMT3  
GPR63  
HOXC13  
KANSL3  
KLHDC1  
LRP1B  
LRRC61  
MRPL43  
MYO15B  
OARD1  
PSME3IP1  
RGD1307603  
RHD  
RNF215  
ROPN1  
RPF1  
RPS4Y2  
TMEM184A  
TMPRSS9  
WDR83  
ZNF616  
ZNF710  
ZNF79  
AASDH  
ADAMTS10  
AFF2  
ANKRD27  
BTG4  
CCDC115  
DCAF12L1  
DCTN6  
DNAJC16  
FBXO38  
IDUA  
IGSF21  
KLHL15  
KPNA5  
MNDA  
MTFMT  
NXPH1  
OXSM  
PAN3  
PAQR6  
PDE6B  
PRAME  
RPL39L

RRAGB  
SCO1  
SMG7  
SYTL3  
TGDS  
TMEM126A  
TMEM131  
TMEM52  
TMPRSS3  
TRO  
UNC5D  
ZBTB11  
GRP  
HELZ2  
MYL7  
CEACAM2  
SLC1A3A  
SNORD15A  
ASB17  
DMRTB1  
TNFSF8  
AAMDC  
CERK  
DIAPH1  
DIS3  
DNAH1  
ESF1  
GMFG  
HCLS1  
IGFBPL1  
ITCH  
KLRG1  
NPTXR  
P3H4  
RPGR  
SKAP1  
TSG101  
CAMK4  
CNTNAP2  
EIF3I  
FLT3  
TOLLIP  
ABCA4  
ADGRG3  
ADPRM  
ALG12  
ALG5  
BRINP2  
CEP57L1  
CNIH2  
DCSTAMP  
DDHD2  
DEAF1  
DHH  
DHX29  
DIPK2A  
ECD  
EXTL2

FAM193B  
GALNT5  
GIGYF1  
GLT8D2  
GRAMD2B  
ILDR1  
KCNH3  
LRRC56  
LRRC6  
MED29  
MIR130A  
PUS7L  
REX1BD  
RFESD  
RGL2  
RHOT2  
SBF1  
SGSH  
TRAPPC10  
TRIM31  
TRPV5  
YEATS4  
ZBTB46  
ZNF462  
CYP4A22  
H2AC10  
H2-Q2  
LALBA  
MIR491  
PWWP4B  
TRIM12A  
ABCA1A  
ABCA9  
ANKRD39  
AP5S1  
ATP1B4  
ATPAF2  
CCDC116  
CDH12  
CFAP126  
CHP2  
CHRD12  
CLCNKA  
CLEC12A  
DCST1  
ERVMER34-1  
FAM160B2  
FHAD1  
FN1B  
FYB  
GP9  
H2-T10  
KIAA1328  
LYSMD1  
MID2  
MIR188  
MIR802  
NPFF

OPTC  
PCDHA11  
PCDHGA9  
PCGF3  
PPP1R35  
PRDM12  
PRKAG3  
RTL8B  
SPOPL  
TRIML2  
TTC21A  
TTLL4  
TUBA2  
VPREB3  
ZFP292  
ZFP809  
ZNF200  
ZNF362  
AHI1  
AIFM3  
AKNA  
CCNK  
CDKN2AIPNL  
CMSS1  
COPS2  
CPB1  
ELF5  
GOPC  
LUZP1  
MIR19A  
MRPS7  
MTHFD2L  
MYT1  
NGB  
OGDHL  
SBSN  
SEC16A  
SEH1L  
TMEM205  
TTYH3  
TXNL4B  
GABRA5  
LHFPL6  
PYY  
SOSTDC1  
ABHD10  
ADPRS  
ANKIB1  
AOAH  
B4GALNT4  
CCDC15  
CR2  
CYP2C13  
CYP2J9  
DMRT2  
EDC3  
EFCAB11  
ELAC1

ENOX2  
ENPP6  
ERI1  
FSTL4  
GPR84  
GRHL2  
HES4  
HMGXB4  
HS2ST1  
MAB21L3  
MIR134  
NAP1L3  
OVGP1  
PDCD2L  
PDIA2  
RELL2  
SCRN3  
SH3GL1  
SLC37A1  
SNX27  
SPRYD7  
TARS2  
TCTN1  
TSEN54  
WDR11  
ZCCHC17  
ANKS1B  
EHMT1  
EPHB1  
GFUS  
GGT5  
H2AC18  
LAT2  
MC2R  
MYH4  
PNKP  
RAB27A  
RGMB  
SLC7A3  
VPS13C  
ACTR1B  
ACTR8  
AMELX  
APOBB.1  
ATRIP  
BTBD6  
C1QTNF12  
C9ORF85  
CCDC71  
CCDC85C  
CDSN  
CMTR1  
ENTPD6  
FTMT  
GABRG1  
GABRR2  
H4C4  
IGH-VJ558

KCNJ14  
LRRC29  
MON1A  
NT5C3B  
PDZRN4  
SLC34A3  
SMN2  
TADA3  
TEFM  
TPRN  
TTC7A  
UQCC1  
PNPLA6  
FGF13  
IRX5  
KAT6A  
PPFIA4  
UGT1A4  
ABCC10  
ACY3  
ANKRD34A  
ASAP3  
ATG13  
ATP5C1  
BCAS1  
BTBD2  
CA8  
CD244  
CHRNA7  
CSN2  
CYP4F3  
ELP2  
EPRS  
EXOC5  
FIBP  
GLYCTK  
GPR132  
GPRIN1  
HBE1  
HDGFL3  
HHAT  
IKZF4  
INPP5F  
KIF1C  
KLC2  
LLGL1  
MDGA1  
MFSD8  
MOAP1  
NAP1L2  
NME5  
NMNAT2  
PAQR8  
PPIP5K1  
RNF165  
RSPO2  
SCO2  
SEPTIN5

SLC22A11  
SNAP91  
TBC1D8B  
TBX5  
TMEM214  
TMEM243  
USP16  
UXT  
APOBEC3F  
BICRA  
C1ORF210  
CCDC162  
CD300C2  
CLEC4A2  
CLVS1  
EVI1  
GPR45  
GPX4A  
PCDHB11  
PKD2L2  
PROB1  
RAB44  
TSPYL3  
XLR3B  
YARS  
ZFP799  
CYP2A22  
EAR10  
FAM110D  
FREQ  
HEATR4  
SRF  
ZFP653  
ADM2  
CELF5  
CLDN12  
CPLX1  
DNASE2  
DUOX1  
KCNE2  
MKKS  
SRCIN1  
STX7  
TTLL12  
VPS35  
BTN2A2  
CHMP6  
EXOC3L2  
FAM3A  
GRID2  
HDGFL2  
IGH  
KLHL40  
MIR542  
MNX1  
PPP1R17  
PSORS1C2  
RAB42

SLC28A3  
SSNA1  
TOP3B  
TRIM17  
WFDC3  
ZDHHC11  
ADAM2  
ARHGAP33  
BCL2A1B  
CCDC97  
CELF3  
CEP72  
DNAL4  
FBXW4  
FOCAD  
GAS8  
GYG  
HMG20A  
INTS9  
KCP  
KTI12  
MIRLET7C  
PDZD4  
PNPLA4  
R3HDM4  
RASAL3  
RETREG2  
STCH  
STK32B  
TMEM26  
TOMM6  
VPS11  
WDR25  
XKR5  
ZNF195  
ABTB1  
ATP6V0E1  
CAR4  
CEP43  
CLEC5A  
DISP2  
DUSP19  
EDF1  
FOXRED1  
GALR1  
GEN1  
GPR107  
GRIN3B  
HOXB8  
IGKC  
IMP4  
ITGB1BP2  
ITK  
KIF26A  
LSM14B  
MIER3  
MOBP  
MORN2

NEK3  
PHYHIP  
POLR2B  
PYROXD1  
RAB22A  
RHCG  
STK19  
TMEM268  
TMEM87B  
TTF1  
VASH2  
WBP11  
GNAL  
MIR22HG  
PDYN  
CACNA2D3  
CEP128  
DENND1A  
KCNQ5  
MYO9A  
OTUD4  
PAQR4  
RAB3A  
SHROOM3  
SOX10  
TREX1  
AGAP3  
ARHGAP32  
ARHGEF15  
CCDC138  
CLIC2  
CYTH4  
DGCR2  
EFL1  
EVA1C  
EXO5  
FAM241B  
FBXO28  
FGF11  
GGACT  
GLDN  
HAUS8  
HP1BP3  
IL34  
KATNBL1  
LRRC2  
MEFV  
NFKBID  
PPP4C  
RAB35  
RABL6  
RNF123  
SH2B2  
SLC35B3  
TBC1D9B  
TBX18  
TESK1  
TMEM259

TPCN2  
ADCK1  
ALOX12E  
ANXA8L1  
ARRDC1  
BARHL2  
CELA3B  
CENPC  
COL6A5  
EXD2  
H2AC23  
H2-OA  
KIAA0100  
KLHL10  
KRT31  
MIR151  
PCDHGA3  
PTH2  
SHISA9  
SOX30  
SPTBN5  
TCP11  
TMEM229A  
TMIGD1  
ZFP280B  
ZFP7  
ZNF337  
ZNF511  
BTN3A1  
CACFD1  
CASS4  
CCDC130  
CCDC149  
CCM2  
CD1D  
CDK11B  
DEFB4A  
DRG1  
FSTL5  
GNL1  
GPR37L1  
GTF3C3  
IL11RA  
KLHDC7B  
KREMEN2  
LHFPL3  
LTB4R2  
MEGF11  
MGAT4C  
MLLT1  
MMS19  
MUC15  
NBPF1  
NFIL3-6  
NGP  
PKHD1L1  
PNMA1  
POLR2J

PTDSS1  
PWWP2A  
RBMXL1  
SHKBP1  
SNX30  
SPATA5L1  
TAMM41  
TMEM178  
TRIM45  
WFIKKN1  
XXYLT1  
ZAN  
ZNF33B  
ZNF562  
ZSCAN2  
CDC14A  
CHRND  
DIP2C  
DNMT3L  
EFS  
FAM98A  
OVAL  
PARD6B  
PCSK2  
SEMA4F  
ST8SIA1  
SYT2  
TMEM100  
USP34  
ADCY5  
ADAMTSL1  
AGO3  
CYP4V2  
DGLUCY  
FBXO6  
GAREM1  
GLRB  
GOLGA5  
GOLPH3L  
GPR18  
HDHD2  
HNRNPA0  
HTR2A  
LIX1L  
MSANTD3  
NACC1  
NOXA1  
PAXIP1  
PBSN  
PDZD3  
POU4F1  
PPP1R16A  
PSD  
PUM3  
RABGEF1  
RNF182  
SLAIN1  
SMUG1

SRP19  
TBC1D23  
UBE2F  
ULK4  
VPS28  
VPS50  
ZNF277  
SCN1B  
ADGRL3  
CTNS  
DLX1  
HCRT  
TPPP3  
XK  
CYP2A12  
KLK1B26  
MAGEA12  
SLC2A7  
SPZ1  
SUN5  
CMPK  
NKX2-8  
PCDHGB2  
ACAP3  
ARL13B  
CNOT6  
CSF2RB2  
CWF19L1  
CYP2J3  
DACH2  
DKKL1  
EN2  
FBXO17  
FBXO46  
GET4  
GZMM  
H1F5  
HMX2  
HOXD11  
IFI202B  
KNG2  
LARGE2  
LEMD3  
LRRC25  
LTO1  
MANBAL  
MAO  
MCAT  
MIR139  
NRADD  
PAX1  
PCED1A  
PIGL  
PIH1D1  
PRR14  
PSTK  
RAB36  
RALYL

RASGEF1C  
SLC10A3  
SNX21  
SOX15  
STARD3  
TAZ  
TNFRSF17  
TRIM55  
UGT1A7C  
URAD  
VPS37C  
ZBTB33  
ZDHHC22  
ZMAT2  
ZNF354A  
SIRT2  
ABCC11  
CIAO2B  
CPO  
CRISP3  
CRYGC  
EPB42  
FAM163B  
FBXO10  
FBXW17  
GPR26  
GSTA  
INKA1  
INSYN1  
MAEL  
MARCHF9  
MS4A8A  
SLC25A2  
SLFN8  
STUM  
SYCN  
TEKT5  
TLR12  
TPTE2  
TRMT61B  
ZCCHC4  
ZFPL1  
ZNF688  
ATAD1  
ATP12A  
ATP13A2  
DCDC2  
DNAJC18  
EIF2B1  
GPATCH2L  
GPR161  
GPR37  
GTF3A  
HOMEZ  
LRRC8B  
MAN1B1  
MIR146A  
NECTIN4

NINL  
NOL4L  
PIP5K1C  
PPME1  
PRR15L  
PRRT1  
PTPRCAP  
RAB37  
RMI1  
SCRG1  
SDE2  
SIM2  
SLC10A4  
TMEM80  
TOMM5  
TRMT10C  
UTP18  
WNT6  
EDN3  
GRIK2  
ATAD5  
DGKG  
HLA-E  
MAP3K20  
SSTR1  
ZBTB1  
ABT1  
BAALC  
CASTOR2  
CCDC30  
CDC20B  
CFAP45  
CMTR2  
EPHX3  
FBXL14  
FCN1  
FOXD4  
FOXE1  
FOXI1  
GLIS1  
IRGQ  
KREMEN1  
LARS  
MIR107  
MIR181C  
MTCP1  
NAF1  
NHLH1  
NR1H5  
PAK5  
PCBD2  
PPP1R8  
PPP6R2  
RASL10A  
RBMS2  
RPP21  
SEC22C  
SLC35A4

TCEAL3  
THOC5  
TNMD  
TTC32  
ZFP1  
ZGRF1  
ARTN  
CTXN1  
DENND4C  
ELOB  
FAM189B  
FBXW5  
GGA2  
INSM1  
KCNT1  
LRIF1  
LZTS2  
MLH3  
NRG2  
NUP214  
PANK2  
PPIL2  
RPP38  
SLC30A6  
SRCAP  
SRL  
TBCK  
TSNAX  
VSX1  
ZHX1  
LARP1B  
HTR3A  
C11ORF96  
CC2D2A  
CPNE3  
GPBP1  
UHMK1  
MAGEA8  
RHOX6  
CXCL12B  
EGR4  
HNF4  
MELA  
RAB6C  
SNORD87  
VTG  
ZFP513  
ASZ1  
CABP5  
CBWD1  
CD1A  
DAND5  
DHX34  
DPPA4  
EMX1  
FOXE3  
IL36A  
KRT12

LCE1C  
LCE1F  
LCE2A  
LMTK3  
LYZL4  
MIR24-1  
MIR296  
MIR378A  
OTUD7A  
PABPC1B  
PLK5  
PRM3  
SERPINB1B  
SH2D3A  
SPIN2A  
SSPO  
ZDHC1  
ZFP688  
ZNF383  
AKIP1  
BRIX1  
CNTLN  
DDX42  
FCGR1  
FGFBP3  
GLT1D1  
H3-3B  
HBB-B1  
MAN2C1  
MIR96  
MPPED2  
NIPSNAP2  
PAGR1  
PDCD1  
POMT1  
PTP4A2  
SASS6  
SEMA3G  
TMEM130  
ABCB8  
ANAPC2  
BATF2  
BEAN1  
CEP44  
CFAP53  
CYB5D2  
CYP2D3  
DUSP18  
GDAP1L1  
GGT6  
GPR83  
GRK4  
GTPBP6  
H3C7  
IGSF5  
KCNIP2  
LEMD2  
LIN52

MIR101A  
MIR140  
NSRP1  
NUP188  
OCEL1  
PHACTR4  
PHF21B  
PLPPR4  
QRICH1  
RANBP17  
SARS2  
SFR1  
SFT2D1  
SLC25A35  
SLC35C1  
TNK1  
TOP1MT  
TTC19  
UNC79  
WDR73  
ZBED4  
ZER1  
ZNF117  
ZNF706  
ADIG  
ARHGEF4  
CSKMT  
DEFA1  
DYNLT2A1  
MIR24-2  
PGAM1A  
PKDREJ  
RASGRF2  
RNASEL  
SLC22A30  
SLC29A4  
STFA1  
TMTC3  
ZFP449  
ZFP61  
ZIM1  
C3ORF35  
KRTAP5-4  
LBX1  
LRRC52  
ZNF366  
AARS  
CD300A  
CEP85L  
CYTL1  
DIS3L2  
DOK5  
GBP5  
HAND1  
KAT7  
KIZ  
KRT6B  
METAP1

MICAL3  
MUS81  
NCSTN  
REPS2  
SEPTIN7  
SIX3  
SLC9A8  
SPECC1  
STAC2  
UBXN4  
UCN  
USP40  
WASHC3  
ZBTB2  
ZFAS1  
GRM2  
ND6  
RHO  
ALKBH3  
ASPRV1  
CAMK2N2  
CCDC148  
CCM2L  
CCP110  
CHAMP1  
CMC2  
DBR1  
DENND10  
E4F1  
EIF4ENIF1  
GPS1  
IGHG1  
KIF24  
KLHDC4  
MFSD9  
MIR185  
MIR26B  
MTERF4  
PDIK1L  
PIGX  
POU3F3  
PPP6C  
RADIL  
SGCA  
SLC2A4RG  
SP140  
SPATS2  
STAU1  
STK33  
TAF1B  
TMA7  
TMEM151A  
UBAC2  
UBE4A  
USE1  
APOBA  
ATP5MK  
BRAT1

CCDC40  
CLEC4A1  
COL6A6  
ERVFRD-1  
FAM185A  
KLHL17  
KLRA1  
MIR543  
MIR92B  
MUP3  
NAA60  
OCSTAMP  
PROL1  
SNORD104  
TDRD5  
TNFRSF6B  
TUBGCP4  
UBASH3A  
VSTM2A  
ZFP365  
ZFP444  
ZFP715  
SLC6A2  
GRIN2A  
FBXO2  
PRR11  
RNASE1  
ARX  
CAPZA2  
CARS  
CCNJ  
CLIP3  
EFNA2  
FZD10  
GPC2  
HAS3  
MT1L  
NADSYN1  
PALB2  
PEAR1  
RHOG  
RPE65  
TBX20  
TRIP4  
WDR45B  
AFF3  
CYBRD1  
KLK8  
PTGIR  
TSPAN18  
ARSD  
CAMKMT  
CAMLG  
CAMSAP3  
CCSER1  
CEP89  
CHAD  
CINP

DENND1C  
DNAAF3  
DNNTIP1  
DSTYK  
EIF1AY  
FOXN2  
H2-T23  
HESX1  
HS3ST3A1  
IGSF9B  
IL17D  
LYL1  
MFSD12  
MPP3  
MPV17L2  
MRPL37  
MVB12A  
MYEOV  
NEUROD4  
NR2C2AP  
PACS2  
PAF1  
PCGF2  
PIWIL2  
PPP1R3D  
RGS14  
S100BPB  
SEC61A2  
SLC13A1  
TATDN3  
TECPR1  
TSPOAP1  
UBE2QL1  
UBXN2A  
ZBTB41  
ATG14  
CHRNA9  
ELP1  
ICMT  
MAP7D2  
MON2  
MTA3  
PAX5  
PEX26  
UBE2O  
BRIP1  
CALB2A  
CIDECP1  
DBX1  
FIGLA  
GCM2  
H1-6  
RDH2  
ZFP93  
ZNF611  
GPR101  
ACTR5  
ACTRT3

ADGRE4  
BCL2A1A  
C1RA  
CRYGS  
DDX19A  
EPD  
ISM2  
KRT85  
LAMTOR1  
LCN15  
PPP1R32  
RUP2  
TMEM186  
VPREB1  
ACTL6B  
C14ORF93  
CAR5B  
FAM168B  
GTF3C5  
SH3BP5L  
SLC66A1L  
TAF4  
ZFP593  
ZNF469  
GRIN2D  
IL17RA  
PDE8B  
POU2F2  
SLC47A2  
BRD1  
DBNL  
ELMOD1  
ENTPD7  
EPRS1  
FAM210A  
FNIP2  
GBX2  
INPP5B  
KMT2D  
KRT20  
ND3  
SEPSECS  
SERPINB3  
ST6GALNAC4  
TEX30  
TMEM116  
BBIP1  
BFAR  
BFSP1  
CCSAP  
COLGALT1  
DNAJB14  
EXOSC10  
FAAP20  
FAM181B  
GHDC  
GPATCH11  
H2BC7

IFI27L2A  
IFTAP  
LIME1  
MAP3K9  
MIR130B  
MRPL32  
MRPL36  
NEXMIF  
NFRKB  
PGAP6  
PODXL2  
PPP2R3C  
RNF112  
RNF121  
SASH3  
SNRPC  
SPINK4  
STARD9  
SYCP1  
TMEM18  
TMEM230  
TXLNB  
TYW1  
UBTD2  
USP38  
VAMP7  
ZNF185  
ZNF267  
ZRANB1  
KRT35  
LY6C2  
THEM7  
ZFP971  
A4GNT  
BIRC5A  
EFCAB8  
H1F9  
ZNF157  
BICDL1  
C1QTNF1  
CADM3  
CNST  
CPA2  
CYP3A18  
GPR19  
ING5  
MYNN  
PLAAT1  
PLEKHG1  
PRSS35  
RBM4B  
RSPH9  
SLC9A2  
USH1C  
USP31  
ACAT3  
ANKRD1B  
BHLHE23

BNIP1  
CARD14  
CARD16  
CD300LG  
CETN4  
CNOT11  
CYP2J6  
DEFA5  
DYNLT4  
EPHA6  
EXOC6B  
F8A1  
FOXH1  
GSDMA  
GSTT1B  
GZMC  
KARS1  
KCNS1  
LGALS12  
MAP1LC3C  
MIEN1  
MRGPRE  
NFKB1A  
PLAAT5  
PPP1R42  
PTH2R  
SDHAF4  
SSUH2  
TBC1D25  
TLR13  
TMPRSS7  
TRABD2A  
TRPM5  
ZFP386  
ZNF512B  
AMIGO3  
BHLHE22  
C1ORF21  
CDR2L  
CNTROB  
CRACR2B  
DNAI3  
DTWD2  
EBAG9  
GADD45GIP1  
GAN  
GORAB  
IFT140  
IL37  
IQCE  
JOSD2  
LMLN  
NUDT15  
PCDH12  
PHF13  
PPIE  
R3HDM1  
RAB33B

RAP2C  
RNF181  
RNF20  
RNF31  
RWDD1  
SERP2  
SLC39A3  
SS18  
TASOR2  
TBL2  
TTC37  
WIPF2  
YIF1B  
ZCCHC18  
ZNF83  
CCL3L1  
INSL4  
PTCRA  
TIAF1  
ZFP84  
ADAM21  
ANKS1  
C15ORF62  
C3ORF62  
EBF4  
KCNK16  
KIAA1841  
KLK15  
KRT33B  
MIR421  
NANOS3  
SAYS1  
TARSL2  
TGTP2  
TPPP2  
ZFP180  
ZFP672  
ZFP74  
HS3ST2  
KIF5A  
LDHC  
PRKCEA  
SLC5A12  
ACTN3  
EPG5  
PPP1R9B  
TEAD2  
TMEM255A  
TSPAN15  
AMPD1  
ATAT1  
ATP5J  
CCDC12  
CCDC125  
CCDC146  
CIC  
CLEC16A  
CNKSR1

CRX  
DDO  
EPB41L4A-AS1  
ETAA1  
FBXL6  
FER1L4  
HCST  
HEATR5B  
LSMEM1  
MIRLET7E  
PHACTR3  
PIP  
POF1B  
QRSL1  
RNF183  
SCARF2  
SPX  
SSC4D  
TMEM231  
TOM1L1  
TRNT1  
UBALD1  
ZC3H4  
ZNF219  
CHL1  
CHM  
CLEC4E  
DTX1  
EBF3  
GATD3A  
HGSNAT  
KCNN3  
MIR17HG  
MPI  
MT1B  
POLR3H  
SIPA1  
TPRA1  
VAR1  
ASTL  
BBLN  
BMX  
CALHM5  
CDNF  
CEACAM20  
CHMP7  
CIAO3  
CYBC1  
DIS3L  
DNAJC5B  
DRC1  
EXOSC1  
FAM189A1  
FAM50B  
GOLGA8B  
IER3IP1  
L1TD1  
MMGT2

MRPL44  
MS4A4C  
NABP2  
PLA2G2C  
PRCC  
PRICKLE3  
RAB19  
RAPSN  
RBP2A  
SCARNA17  
SHD  
SLC25A38  
SLC6A16  
STX5A  
SYT14  
TBR1  
TRAPPC8  
TRMT2B  
TSX  
TTI1  
ZNF239  
ZNF512  
ZNF660  
ZNHIT1  
CYP11B1  
FGF23  
RPL37A  
DRD4  
ADSS1  
AMBRA1  
ANKEF1  
ARHGAP23  
CCDC167  
CCDC171  
CHMP5  
CHRNA6  
CYP4V3  
CYTOR  
DHX40  
DSG3  
EEF2KMT  
ERG28  
FAM174A  
FCGR2A  
FXVD4  
GJB4  
GLE1  
GTPBP3  
H1F4  
IFIT5  
KAT8  
KCNIP1  
KLF16  
KLHL6  
LRMDA  
NEUROD2  
OTUB1  
PAPOLG

RAP1GDS1  
SCGB3A2  
SCML2  
SHQ1  
SLC18A3  
SLC25A43  
SLC52A2  
SLC8A2  
SNCAIP  
SOX12  
TMEM185B  
TMEM229B  
TRAF3IP3  
U2AF2  
ULBP1  
YTHDF3  
IP6K3  
VXN  
NF2  
METTL7A1  
OR8B8  
PISD-PS3  
RT1-DMA  
C1ORF216  
CRYGE  
IGF2B  
KIAA0825  
MIR872  
MORN3  
RUFY4  
SLX1A  
SMIM6  
TULP1  
ZAR1  
ZFP131  
ZFP958  
AXUD1  
CACNG1  
CEND1  
CENPC1  
CYP2F1  
DNAAF4  
FRMPD1  
GEMIN7  
GINM1  
GUCA2A  
H2BC13  
IQUB  
IRS4  
KBTBD6  
KEAP1A  
KRBA1  
LINC00312  
MED19  
MIR195  
MIR409  
MTG1  
MYF6

NARS  
PLXNB3  
PRIMPOL  
THSD7B  
TMEM94  
TRP53I11  
TRPC2  
USHBP1  
VPS37D  
ZFP82  
ZNF281  
AGRP  
DISC1  
FGF14  
GLMP  
KCNK3  
PTGDR  
RAPGEF6  
ZNF292  
MIR194-1  
GJA9  
BMB  
DMRTC2  
FGF18  
GBP10  
H2BU2  
KRTAP6-1  
MAP6  
RAG1AP1  
SPRR2K  
H1-8  
HTN3  
INHBAB  
KLHL33  
LCN10  
MFSD7A  
PRKCBB  
TPRGL  
BEGAIN  
CABP1  
CEACAM10  
CHMP1A  
CUL7  
FBXO36  
FCER1A  
GMCL1  
GUF1  
IGFBP1A  
IGFBP1B  
KCNK6  
LGI4  
LYRM2  
MIDEAS  
MRPL41  
NPAT  
PCDH15  
SDR16C5  
SLC7A4

SMIM8  
SMTNL2  
SPG11  
SYNE4  
TCERG1L  
TMEM108  
TRAPPC6B  
FRMD5  
GNG8  
LARP4  
LZTS1  
SYNGAP1  
A3GALT2  
ALT  
B4GALNT2  
C1ORF115  
C4ORF46  
CCDC152  
CERCAM  
CNTN6  
CPSF4  
CRNDE  
CRPPA  
EIF4EBP3L  
FBXW8  
GUCA2B  
H4C6  
IBA57  
KLRC1  
MIR154  
MIR328  
NAT14  
NBPF10  
NKIRAS2  
NSUN4  
PCDHB16  
PIGO  
POLR3A  
RBP2B  
RPS6KA6  
TAF4  
TARBP1  
TBC1D10C  
TRAM1L1  
TREML1  
ZFP385B  
ZNF287  
ZNF84  
ATG9B  
BICDL2  
MAB21L4  
MICOS10  
RPPH1  
RTL6  
RTRAF  
RUNDC1  
ZBTB12  
ALPK3

ARHGAP44  
ART5  
ATP13A4  
CADM2  
CCDC186  
CD6  
COX16  
EVI2B  
FBLN7  
GDF1  
GLUD2  
IFNA2  
IL21  
INTS10  
L3MBTL1  
LEPROT  
MBD5  
MED24  
MZF1  
PFDN6  
PRPF31  
RFTN2  
RNF217  
SEC24C  
SLAIN2  
SLC30A9  
TIMM17B  
TMEM87A  
TOM1L2  
UBE2E1  
ZCCHC8  
EIF5B  
KRT16  
HCN4  
HNRNPH2  
HTR1D  
KISS1R  
RTN4IP1  
ANKRD36  
MIR101B  
ASB12  
BEST2  
BTNL2  
CCDC198  
CEACAM19  
DIABLOA  
DPY19L2  
ERFE  
ERN2  
GAL3ST4  
GGCTB  
GIMAP3  
GLULA  
GSX1  
H2-Q7  
LRRC71  
MBPB  
ODAM

PCDHGA2  
PSG5  
SLC35F4  
TRIM30  
USP6  
ZFP40  
ZNF442  
CYP11B2  
GABRA1  
HTR1A  
ALDH3B2  
ALKBH2  
AVPR1B  
BEND7  
BRMS1L  
CAPN7  
CISD2  
CWC22  
DPM1  
ESYT3  
F2RL3  
FAM160A1  
FGD1  
ITGA10  
KDM1B  
LETM2  
MAGOHB  
MED16  
MYLK3  
NKAIN4  
NKAP  
NUDT9  
RWDD2B  
SALL3  
SCUBE3  
SECTM1  
SLITRK4  
SNRNP35  
SNX33  
ST6GALNAC1  
SYDE1  
TTLL5  
ZNF532  
ASXL1  
CHMP4C  
DNM3  
LRRC8C  
PHF6  
SNHG12  
CD207  
MIR224  
ALX3  
ANKS1A  
AP4S1  
ARL5C  
CABCOCO1  
CDHR2  
CIAO1

DCAF12  
DHRSX  
DHX8  
DPCD  
DRP2  
EXD3  
GATD1  
GK5  
GKN1  
GPN3  
H2-OB  
HID1  
HMCES  
IFT52  
IQCB1  
KIAA0513  
KRT222  
LILRA5  
MFSD4B  
MISP  
MPPED1  
NEURL1  
OGFOD3  
PABIR2  
PANK4  
PIAS4  
RMND5B  
RPUUSD4  
SNTG1  
SOGA3  
SPAG7  
SPIC  
SPRN  
SULT6B1  
WRAP73  
ZDHHC6  
NOX2  
SEC14L1  
STX11  
ZMYM5  
ACOD1  
ATP5J2  
AZI2  
BDP1  
CACNG7  
CCR8  
CHRNA4  
CHURC1  
DCP1A  
DSPP  
FAM83H  
LRRC34  
MACROH2A2  
NLRP1  
PPM1E  
RBAK  
SI  
SLC25A44

STK32A  
TNR  
UBE2R2  
ZNFX1  
CPHX1  
NGFG  
ZNF582  
CCL3L3  
EAR3  
ESPNP  
MIR365B  
RGD1562339  
SPRR2H  
CAML  
CES1B  
FAM135B  
H2BC22  
HYAL4  
IMPG2  
KRT1-19D  
PABPC3  
PCDHGB4  
PSG9  
PTPRQ  
RDH1  
STAT5  
TMEM167  
VSIG2  
ZFP97  
ZNF628  
ABCA17  
BLOC1S4  
C17ORF49  
C6ORF47  
CABP2  
DHRS4-AS1  
FLYWCH2  
GGN  
HSP90AA1.1  
IRAG2  
KLHL1  
MCF2L2  
MCL1A  
PCDHA2  
RBM23  
RIMBP3  
RRH  
TCTE1  
WDR53  
XKR9  
YIPF7  
ZFP346  
ZFP553  
FOSAB  
LTN1  
MIR1224  
MIR145  
RCOR2

AGR3  
ALG1  
BPIFA1  
C14ORF132  
CDH24  
CEP295  
EDAR  
FCHO1  
GLB1L2  
GPR20  
GTPBP8  
HOXB1  
HSH2D  
ICA1L  
INSRR  
IPPK  
KCNK4  
LRCH4  
MED9  
MIR497  
MRPL10  
NATD1  
NEPRO  
NFE2L2A  
NIPA2  
NR2E1  
NUDCD3  
PRXL2C  
RIBC2  
SLC26A7  
SMIM29  
SUDS3  
TENT4B  
TNNI3K  
TRAPPC5  
TTC4  
ZFP703  
ZNF561  
CYP21A2  
PENK  
ALOXE3  
APBA2  
ATP5PF  
CEP19  
CRYBB2  
DTNBP1  
EDEM2  
EVC  
HDDC2  
KLHL28  
MIR206  
PLCB2  
PRSS22  
SCMH1  
SEPTIN3  
SLC44A5  
SLF2  
UBA6

ZNF207  
DSG1B  
PRDM7  
JAM3B  
MIR499  
OR52W1  
AP1M1  
CCDC66  
CRIPT  
DPEP2  
H1-4  
HPCA  
ILRUN  
KIF7  
KLHL26  
LAIR1  
LYSMD3  
MCPT1  
MEIOB  
MMP25  
MPLKIP  
NLGN2  
PCNP  
PCNX4  
PLCH2  
PRDM5  
PRM1  
PVALB8  
RD3  
TTYH1  
ADAT1  
BBOF1  
C21ORF91  
CNGA1  
DNAL1  
EPN1  
FAM199X  
FAM30A  
FBXL2  
GLYATL1  
HECTD3  
IQSEC3  
MORN1  
PLA2G4B  
PSMG3  
SLC4A1AP  
TMEM126B  
TMEM74B  
TMEM8B  
TRAF7  
UBXN2B  
VWA7  
WIZ  
ZDHHC4  
ZMAT1  
KIDINS220  
TC2N  
DCDC2A

KLRB1A  
PNLDC1  
SPATA25  
ZFP459  
B9D2  
C20ORF194  
CA7  
CLUL1  
COP1  
CPLANE2  
DYRK4  
ELOVL4B  
FAM86C1P  
FCHSD1  
FKBP6  
GLP2R  
H2-M3  
H2-T22  
KLK4  
KRT27  
LBX2  
MIR424  
NCMAP  
PFKMB  
POTEF  
SMCP  
STARD6  
TEX36  
ANKRD13C  
ARHGAP42  
CACNG4  
CDK2AP1  
DARS2  
DSEL  
FUOM  
GRIK4  
ILVBL  
LHX9  
LIN7B  
MFF  
MIER1  
MRPS14  
PREPL  
PRRC1  
TMEFF1  
TMEM88  
YEATS2  
CHRNA5  
H2AFX  
ATG101  
AUP1  
BMP10  
CCDC96  
CDAN1  
CEP104  
CLASRP  
COMMD9  
DNAH17

EVC2  
FBXL13  
FSIP1  
GIMAP5  
GPR137  
H3C12  
H3C13  
HACE1  
HBG2  
HMG20B  
HYAL3  
LHX3  
LINGO2  
LRRC27  
MED22  
MFSD5  
MIOS  
MIR135B  
MIR193B  
MRM2  
MRNIP  
MYO3B  
MYO7B  
NEURL1A  
OLFM4  
ORMDL1  
PI15  
PILRB  
PPIL6  
PPM1F  
PTAR1  
RAB9B  
RNF111  
SIKE1  
SKIDA1  
TCTN2  
TMEM59L  
TOPORS  
URGCP  
VMA21  
YPEL4  
CD59B  
CYP2D40  
DEFA6  
DPYDB  
FBXL21  
FER1L5  
GT(ROSA)26SOR  
MAGEB2  
MUP19  
SNORA69  
SULT2A7  
AQP8A.1  
DEFA29  
HTR1E  
MAGEA9  
PCDHGA4  
RBM46

SLFNL1  
TMEM89  
ZFP280C  
ZFP92  
ANO3  
CCL19  
CLDN8  
COL23A1  
CSTF1  
MAK  
MAP3K11  
STK35  
SV2A  
AFP4  
ANKAR  
ANKK1  
CCDC170  
CEACAM3  
CLDN17  
DPPA3  
EAR1  
FAM122B  
GAPT  
GBP7  
KCTD8  
KIAA0754  
LCE1D  
LGALS2B  
LHFPL5  
LINC01554  
NBPF3  
PHETA2  
PPP1R14D  
RNF25  
RRP36  
RSC1A1  
S100A5  
SLITRK2  
STRIP1  
TBXT  
TIGD5  
TPRG1  
UGT2B38  
WARS  
ZC2HC1C  
ZFP24  
ZNF263  
ZNF488  
FBXO39  
CHRM4  
HTR6  
NAPEPLD  
PATJ  
ABHD13  
ALX1  
C12ORF57  
CCDC103  
CEP162

DIPK1C  
DQX1  
EIF2S3  
FAM124A  
HTR5A  
LIN9  
LRRC75B  
LYRM9  
MIR106B  
MRS2  
NAXD  
NIPAL4  
PEX5L  
PGAP3  
PRELID3A  
RUBCN  
SIM1  
SPRR2B  
TAC4  
TCF23  
TCHP  
TIMMDC1  
TP53RK  
TRPT1  
WDR41  
ZDHHC8  
ATP6V0A4  
EGLN2  
HLA-DPB1  
ICAM5  
KCTD14  
MYOC  
NCAN  
SLC35C2  
TPH2  
UBQLN2  
PDE1C  
SLC30A2  
ANXA9  
B4GALT4  
DPP10  
ESYT2  
KCNT2  
OVOL1  
SEMA3D  
SPOCK3  
SYT4  
TAGLN3  
AAGAB  
ABO  
AMER1  
ATXN7L2  
CYP1C1  
DCAF17  
DNAJC27  
EBF2  
FAM91A1  
FRMPD4

GOLGA1  
IQSEC2  
KATNA1  
KBTBD4  
KCNG2  
KCNK13  
KIAA1549L  
KRI1  
LYRM7  
METTL22  
MIEF1  
MIR423  
MIR532  
ODF2L  
PDCD1LG2  
PIBF1  
RESF1  
RPUSD2  
RTN4RL2  
SAG  
SOX21  
SPINK2  
ST8SIA5  
SYT6  
TGFBRAP1  
TRIM3  
TXNL4A  
VWA5B2  
ZDHHC17  
ZNF618  
ZNF624  
FNIP1  
ALG10  
ATP5MC2  
CLDN7A  
DUBR  
EFCAB3  
FAM25A  
KARS  
LGALS5  
MIR339  
NFE2L1A  
NPIP3  
OMG  
PBLD2  
RT1-CE5  
SLC30A8  
SMIM4  
TKTL1  
TMEM222  
TMEM91  
TRIM15  
WAP  
WNT8A  
ZFP608  
ZNF639  
ZNF823  
CASC15

CCDC43  
CLDN19  
FAM65B  
GPR150  
KIF27  
LRRC31  
LYSMD4  
MIR136  
MMP27  
NDUFAF6  
PEBP4  
POMT2  
SNHG17  
SPNS3  
TMEM200C  
VARS  
VNN2  
ZFP462  
ZNF516  
MCPT9  
SEC1  
SPACA1  
TP53TG3  
CYBASC3  
CYP2C69  
EQTN  
GPD1B  
H2-Q6  
IZUMO1R  
KIAA0319L  
OAS1C  
PCDHGA11  
PRSS41  
SPINK7  
SPRR4  
SULT2A8  
TTY14  
ZFP524  
ZFP639  
ZFP664  
ADAM30  
C77080  
CATIP  
CNTNAP5  
KLHL34  
KPRP  
LINC00482  
MIR383  
OSGN1  
PSG8  
QRFP  
RNASE11  
TMEM105  
USP30-AS1  
GABRB2  
SSTR3  
FAM76B  
FREM2

KCNJ1  
RTKN2  
SIK3  
SOST  
SPOP  
DIP2A  
MIR324  
PLEKHM2  
ADAMTS20  
ALG10B  
ATF7  
CCDC65  
CD163L1  
CDX1  
COA8  
CTRC  
CYB5D1  
DMAC1  
FBXL17  
FFAR4  
FOXD3  
H2AC11  
IDNK  
INO80E  
LRRC7  
MAP7D3  
MIR100  
MTUS2  
MUC20  
P2RY10  
PADI3  
PCGF6  
PCNX2  
PFKFB4B  
PLA2G10  
PLEKHH3  
PRORP  
PRRG3  
RANBP3  
RNFT1  
SDHAF1  
SH2B1  
SMARCC2  
SNHG15  
SP2  
SP6  
TMEM169  
TNRC6C  
UBTD1  
USP44  
WDR86  
WDR92  
ZNF410  
DOC2A  
HLA-DPA1  
IPCEF1  
PCDH20  
SUMO3

TOR1AIP2  
CYP1A3  
DAF-16  
MIR433  
NPY4R  
PLET1  
ANKS3  
ARHGEF38  
C11ORF52  
C2ORF88  
CCDC150  
CD300LB  
CYB5RL  
DDRKG1  
DMRTA1  
DUSP28  
EEF1AKNMT  
ETV2  
FSD2  
GPATCH1  
GPR12  
HDHD5  
HNF4AOS  
KCNG4  
KIAA0232  
KLF8  
LRIG2  
LRRC57  
LRRN4CL  
MCL1B  
MIR127  
MIR411  
MTRF1  
NYAP2  
PCNX1  
PIWIL1  
PPP1R27  
PSG4  
RAB6  
RIC3  
RINL  
SLAMF6  
STX4A  
TMEM185A  
YJU2  
ZFP260  
ZNF142  
ZNF33A  
ZNF382  
ZNF397  
ZXDB  
H2BU1-PS  
MAT2AL  
MYCB  
CENTD2  
MOGAT3A  
NRP1A  
OLFR1014

SELO  
UBALD1A  
ZFP128  
ADGRF2  
SMFN  
PRSS58  
APOLD1  
GRK2  
ABRAXAS1  
ACD  
ADAMTS18  
BAXA  
CACNG8  
CCDC102A  
CHCHD5  
DNAH12  
ERICH5  
FARP2  
GPR4  
HOXC10  
LIM2  
LLPH  
LRRC8E  
MESP2  
MIR18A  
MIR574  
MIR99B  
MOB1B  
OXA1L  
PCNX  
RBIS  
RGP1  
RIMS4  
SLCO5A1  
SMARCAD1  
ST6GAL2  
STAC  
TNFRSF13B  
TXLNG  
USP37  
UTS2  
ZBED8  
ZNF430  
GLP1R  
SCN10A  
BEND6  
CALCB  
CCDC85B  
DCAF6  
DUS4L  
GALR2  
HAUS2  
IGSF10  
IL1RAPL1  
IQSEC1  
KCNA1  
MFSD6  
SLC5A8

BOLL  
ZRP  
GLT28D2  
H2-K2  
KLK1B8  
NUGGC  
PRKACG  
SFRS16  
SLC22A14  
SNORA5A  
SPRR2I  
TRIM30D  
ABCC13  
ANPEPB  
APOA1A  
CALML5  
CCDC58  
CD55B  
DNM3OS  
GJD4  
GUSBP11  
GZMH  
IFITM5  
PHF11D  
PIGYL  
POU4F3  
PRSS55  
SLC26A3.2  
SSPOP  
TAS2R31  
TCRA  
TRIM80  
ZFP637  
TMPRSS5  
UBQLNL  
UMAD1  
ZNF773  
AKAP17B  
AP5M1  
ARMC5  
ATPAF1  
CACNA1E  
CD226  
CDHR4  
CHRA1  
CLDN16  
CNGB1  
COMMD4  
CRYBA2  
CYP1C2  
CYP3A65  
DMRTA2  
DSC1  
EFCC1  
ERI3  
FAM207A  
FAM222B  
FAM53C

FBXL19  
GATC  
GFI1B  
GFM2  
GH  
GLMN  
GNRH2  
GRIK1  
GUCY1A2  
HLA-DRB4  
HTR1F  
IFFO2  
IL1F10  
JRK  
KCTD7  
KIAA1217  
LRRC4C  
METTL23  
MIR351  
MMAA  
MZT1  
NKX3-2  
NSA2  
OMP  
PARVG  
PAXBP1  
PCDHAC2  
PGAP4  
PGCP  
PHOX2B  
PLEKHM3  
PM20D2  
PPM1J  
RAX  
REXO1  
RSPH14  
SAMD10  
SAMD12  
SCGB1C1  
SGF29  
SIX6  
SLC6A19  
SLX4IP  
SPAG8  
SRP14  
STPG1  
SUGP1  
SUSD6  
TCN1  
THTPA  
TM4SF18  
TM4SF5  
TMEM182  
TRIM71  
TSTD3  
TXNDC11  
WSCD2  
ZFP30

ZFP521  
ZMYM1  
TYR  
GABRG2  
ATP2B3  
CHRM5  
SNX25  
TTC9C  
ANGPTL7  
ANKRD13A  
ATCAY  
CDH18  
FANK1  
FIBCD1  
FLYWCH1  
GIMAP8  
LYPD6B  
MIRLET7D  
MMRN1  
MPZL3  
N4BP3  
NECAP1  
PRPF38A  
SCYL2  
SETDB1  
SLITRK1  
SRRM4  
TESMIN  
TIPRL  
TMEM74  
TMOD3  
TTLL6  
VSTM2L  
ZFHX2  
ZNF518A  
FEV  
MIR128-1  
RS1  
ZNF232  
AARS2  
APOBEC2  
ARMC2  
C3ORF70  
CCDC177  
CCT6B  
CDH19  
CFAP77  
CNEP1R1  
CPNE6  
DHRS7C  
FAM174C  
FAM89B  
FCGR4  
HDX  
KDM5D  
KLRC2  
LINC00304  
LRRN2

MEPE  
MIR337  
MIR345  
NAIP5  
NOTCH2NLA  
RASGRP4  
S1PR4  
SMIM19  
STX10  
TRIM56  
TRIM72  
TSPAN10  
TTC5  
WDR91  
YAE1  
ZBTB25  
ZNF600  
ZNF606  
SNRPD2  
STK26  
SYT17  
VKORC1L1  
CD1D2  
MUP10  
CSTAD  
FLT3L  
KLK1B5  
LDLRAP1A  
MIR26A  
RIAN  
SCAND2P  
SPRY3  
ZNF875  
ADAM5  
ARMH3  
C11ORF1  
C18ORF32  
C4ORF48  
CCDC144B  
CCN2A  
CHD5  
DINT1L  
DNALI1  
DTR  
ELFN2  
FASTKD5  
FCAMR  
FCER2  
FKBP15  
GNB1L  
GOLGA8IP  
HBA2  
HDGFL1  
ITLN2  
JAML  
KCNA4  
LRRRC14B  
LRRRC32

MBPA  
MCM3AP-AS1  
MIR493  
MRPL58  
NEUROD6  
ODF3  
OTOS  
PANX3  
POLR2M  
POU6F2  
PSMG4  
RNASE10  
SH2D2A  
SH2D4B  
SLC26A5  
SMIM11A  
SNORA61  
SPATA3  
TAF7L  
TERC  
TIMM50  
UCN3  
VEGFAB  
VPS51  
WDFY4  
WDTC1  
ZFAND1  
ZFP263  
ZFP277  
ZFP428  
ZFP472  
ZFP760  
ZNF333  
ZNF347  
ZNF575  
ZNF93  
ZSCAN26  
ADCY8  
ADD2  
CAMKK1  
SLC38A10  
TOX2  
UBE2W  
CARTPT  
ANKRD54  
ARL14EP  
ATP6V1G3  
BIN2  
CDX4  
CHMP3  
CKMT1A  
CSMD2  
DNAJC24  
ECSCR  
EME2  
FOXB1  
FUT3  
GADD45AA

GKN2  
GLYATL2  
GOT1L1  
GSKIP  
HSC70  
KIAA1109  
KIRREL1  
LANCL3  
LPAR5  
MIR451A  
NEK11  
NOP10  
PARP10  
PHF24  
PRDM10  
PRM2  
REXO5  
RNASEK  
RPTN  
SCN11A  
SDHAF2  
SERPINA1C  
SNAPC2  
SPATA24  
SPECC1L  
TLX1  
TRIM4  
TSR2  
VGLL1  
VSIG1  
VWA3B  
WDR24  
CCDC9B  
CCKBR  
MS4A3  
MVDA  
SAH  
ZFP33B  
CLC  
CLDNK  
KRCP  
MID1IP1L  
MIR3911  
MIR465  
NDUFAB1A  
SGO2A  
TRIM43B  
ZFP438  
ABCD4  
AJAP1  
ATP8B3  
C2CD5  
CA13  
CALCOCO2  
CCNYL1  
COPG2OS2  
CXXC1  
DOC2B

DPF2  
GMEB1  
GRAP2  
INTS8  
KCNN1  
KNCN  
KRTAP2-1  
NAT5  
NIM1K  
OR5V1  
PITHD1  
RAVER1  
RGD1304587  
RGS6  
RPGRIP1  
SLITRK6  
SNHG7  
SOWAHA  
STXBP5L  
TBC1D20  
UBQLN3  
UNC13C  
ZFP42  
ALG13  
CFHL1  
EPHB4B  
KDM4C  
PDCL2  
SEPTIN2  
SERPINB9G  
TMF1  
TSEN15  
USP11  
CDC14C  
GPR139  
KRTAP1-3  
HRH2  
KLHL42  
SHANK1  
CALHM6  
CBR2  
CHRNA  
FFAR2  
NT5C3A  
TULP3  
AASDHPPT  
CAMK1G  
DIP2B  
H2BC3  
MROH1  
SLC9B2  
SMIM7  
TRIP11  
VPS54  
GLULB  
B3GNT6  
FAM177A1  
GP6

HBB-Y  
KRT36  
LCE3C  
LENEP  
LIP1  
MIR302A  
MIR434  
MIR450A1  
OTOA  
PRH1  
SERPINI2  
THAP5  
TMEM35B  
UTP14B  
ZFP597  
ACTL7B  
ADAM1A  
BAIAP3  
BUD13  
C11ORF71  
C5ORF15  
CBLN4  
CCDC62  
CCR10  
CD209B  
CRYGB  
CYP3A16  
FAM220A  
FDXACB1  
FV1  
G6PD2  
GAL3ST2  
JMJD7-PLA2G4B  
KERA  
KLHL30  
KRT72  
LRTOMT  
MESD  
MPIG6B  
MROH2A  
MYO15A  
NCKAP5L  
OCA2  
PCDHGA5  
PTCD2  
RASSF10  
RBM27  
RCVRN  
RGR  
RNASE7  
RNF166  
SLC6A5  
SLFN13  
SLX1B  
SNX11  
SPINK13  
THEMIS  
TMEM217

TMEM52B  
TRIM10  
TTC9B  
ZBTB8B  
ZFP322A  
ZNF280C  
ZNF444  
PROSER2  
SLC25A27  
ADAMTSL3  
AK7  
BCL2L15  
CD72  
CNFN  
FLAD1  
GRM7  
LYPD3  
MEPCE  
MFSD3  
OXSR1  
PRPF4  
PRRT2  
PRSS3  
RLN1  
STAMBP  
TOP3A  
ZDBF2  
CACNA1B  
SLC17A6  
ATXN7L3B  
C6ORF62  
DGKQ  
KLF2A  
PCDHB4  
ADO  
AK9  
AREL1  
C6ORF132  
CDIN1  
DMWD  
EPGN  
FAAP24  
FAM162B  
GADD45BA  
GASK1A  
GPHA2  
H2AC7  
H3C3  
JMJD8  
KLHL11  
MAMDC4  
MCF2  
MCPT4  
MON1B  
MSGN1  
NRL  
PHETA1  
PRDM9

PTGER1  
RBPJL  
RIPOR3  
SHFL  
SLC26A4  
STIMATE  
TCEANC2  
TMC8  
TMSB15B  
TNFRSF13C  
TNP1  
TUT1  
WDPCP  
WDR17  
XKR4  
ZG16  
ZNF330  
ZNF711  
FBXL16  
HSCB  
MSL3  
MTSS2  
OSCP1  
SLC38A7  
SMYD1  
TRHR  
UBR7  
API5  
ADAM4  
CA6  
CCDC63  
CCL16  
CD164L2  
CLEC2G  
IGL  
MIR301B  
UBXD2  
ALDOCB  
APOA1B  
ART2B  
BCL2A1C  
BPIFA2  
CCDC110  
D16ERTD472E  
DUSP27  
FUT6  
IL17C  
MIR326  
MST1L  
NAIP1  
OIP5-AS1  
PIP5KL1  
RIPPLY2  
SIGLEC6  
SNAI3-AS1  
SYBL1  
TBX22  
TCRB

TMEM187  
TMEM198  
UGT1A6B  
VWA2  
WDR66  
ZFP948  
ZNF543  
ZNF585B  
AKR1A1A  
C2ORF72  
DYNLT5  
LYG1  
OTOP2  
SMC1B  
TMED7-TICAM2  
ZFP212  
ZFP771  
TCTEX1  
SERBP1A  
MUC3  
TOMM20A  
APRIN  
ETOHD2  
DSG1C  
SVS3A  
CAPZA1  
CNTF  
GRM4  
MIR467E  
RHOX8  
SPATA8  
ACCSL  
ANKDD1B  
OLFM1B  
PCP4A  
PKD1L3  
PRAMEF11  
SLC22A26  
ZFP687  
ZNF28  
ABRA  
AKR1E2  
ANAPC15  
ANKRD36B  
ARHGEF37  
BORCS7  
BROX  
C9ORF72  
CARD11  
CCDC39  
CFC1  
CLEC1A  
CTC1  
CYP4X1  
DCLK2  
DCP1B  
DDX55  
DENND6B

DEPDC1A  
DNAH10  
EMC10  
FBXL8  
GPR50  
GRM6  
H4C1  
IKZF3  
JSRP1  
LHX5  
MATN4  
MED17  
MEDAG  
MID1IP1A  
MIR1915HG  
MIR9-1  
NKRF  
NTSR2  
POU3F2  
PRMT8  
RAB41  
RAET1A  
SCARNA12  
SEL1L2  
SIX2  
SLC39A9  
SLC50A1  
SLC5A4A  
SLC8A3  
SNORA20  
SPACA6  
STRA8  
TAC2  
TAF2  
THAP2  
TMEM132B  
TMEM201  
TTLL9  
UBN2  
WT1-AS  
ZNF654  
ADGRG4  
ALPPL2  
ANKUB1  
ARL6IP6  
CFAP52  
HLA-H  
KRT26  
LCE2C  
LCN12  
NHLRC1  
PAX9  
PRDM14  
PRDM6  
RBM12B  
SAP130  
TBCCD1  
TRMT44

USP30  
WDR89  
ZFP354B  
AKR1C6P  
CGB7  
SCGB1D1  
TCEAL6  
ASMTL  
DYNC1LI1  
FXD7  
GPATCH2  
HCN3  
HSPA12B  
MRRF  
MYO19  
PTGDR2  
RAVER2  
ZNF644  
BOD1L1  
FABP9  
AKR7A5  
AMY2A  
ANKRD13D  
C4ORF19  
CARD19  
CCDC32  
CFAP44  
CGAS  
CHST10  
CHTOP  
CXCL17  
CYP4F18  
DNAJC25  
EEF1AKMT1  
ELAPOR2  
GUCA1B  
H2BC18  
HEPACAM  
HEPACAM2  
IL1RL2  
KCNV1  
KCTD4  
KLK13  
MIR674  
NAXE  
PAR6G  
PCDHA9  
PRDM11  
PRSS27  
SLC1A7  
SNX20  
SUSD5  
TAF6L  
TXNDC15  
UBE3D  
UBOX5  
ZNF280D  
ZNF44

AAR2  
ASCL1A  
CCDC83  
DMAC2  
DNAJB8  
FNDC7  
GAL3ST3  
HCAR1  
IARS  
KRT33A  
MKRN3  
NWD1  
PCDHGA12  
RTL3  
SLFN9  
STEEP1  
TOPAZ1  
TPTE  
TSSK6  
URAH  
WFIKKN2  
ZFP617  
ZFP706  
ZFP800  
ZFP810  
ALDH9A1A.1  
C11ORF24  
COL25A1  
FAM166B  
FTHL17  
H2-BL  
KIAA0753  
KRTAP3-1  
LCE1E  
MIR29B1  
NAT16  
PPP1R12C  
PRKY  
SPINDOC  
PDE3A  
FAM120A  
GDF5  
GTF2H3  
MRAP2  
RAD9A  
SLC25A21  
SPTA1  
SCN9A  
GABRA2  
C5ORF34  
CENPB  
CEP20  
FAM131A  
FAM184B  
GUCY2D  
LRRC26  
MOSMO  
MYRFL

POLR3C  
SIGLEC10  
SULT1C3  
TMEM121  
VTA1  
AP1G2  
ASB3  
ATMIN  
CARD8  
COX18  
EPM2A  
FAM163A  
IL23R  
INTS14  
LAGE3  
PLPP4  
SLC6A7  
SNPH  
TRPM1  
UTP23  
VGLL2  
DLGAP1  
DYNC2H1  
ST7L  
XCR1  
ZBTB24  
COX19  
EIF4EBP3  
ELOVL4  
PCDHA4  
AQP6  
ARR3  
CCDC122  
CYP4F39  
DHDH.1  
GDAP10  
H4C5  
KRT83  
MIR369  
MIR503HG  
OVCA2  
PCDHB9  
PRSS32  
R3HCC1  
RNASE9  
SDR16C6  
SLC35E2  
TCEAL2  
TEPP  
ZBED6CL  
ZC3H12B  
ZFP324  
ZFP362  
ZFP618  
ZNF506  
ZNF598  
ZSWIM7  
AARSD1

ARHGAP36  
BTBD19  
CDH20  
DCPP3  
H2AC14  
INAFM1  
KRT6C  
MIR4435-2HG  
MIR450B  
PGBD3  
S100A7A  
SPATA33  
TEFB  
TRIM67  
UGT8A  
ZAK  
ZFP451  
ZFP787  
ZNF275  
ZP4  
ZXDA  
ACSL4A  
CD209D  
LILRA3  
MAGEA4  
MIR547  
POTED  
ZFP169  
C6ORF52  
CAPRIN1B  
DIAP1  
OPN5  
REG1B  
RTBDN  
SNORA64  
SOX19A  
AKR1C21  
GJA10  
GNA15  
MYEOV2  
OLFR166  
WDR88  
ZFP568  
ENO1B  
LNK  
P2RY5  
PCDHB1  
RXFP3  
TNFRSFA  
VCX3A  
DGCR5  
CORT  
EXOSC3  
GUCA1A  
KCNC2  
KLK10  
ORAI3  
PLAG1

WAC  
SPRR2F  
TRIM16L  
AMER2  
APOBR  
ARPC1A  
ATPSCKMT  
BOD1  
CCL18  
CHRNA3  
CNPY1  
DNAH9  
DTD2  
ESS2  
FAM83F  
GRAP  
KIF6  
KIN  
KIRREL2  
LRCH2  
MAGEL2  
MIR99AHG  
MOB3C  
MRFAP1  
NDUFAF8  
PHOX2A  
PHYHIP  
RC3H2  
SENP8  
SPTSSB  
TRAF3IP1  
TTC1  
VMO1  
ZNF573  
TNFSF15  
C1QTNF2  
SIAH1  
TTBK2  
ACER1  
ARMH4  
ATG9A  
ATP8B4  
BTBD1  
CLUAP1  
CPLANE1  
CYP2C22  
DNHD1  
DYDC2  
FAM161B  
GALNT17  
GTPBP10  
INTS13  
KAP  
KDELRL  
LRFN1  
MAP6D1  
MIR202  
MITD1

MYO16  
PLB1  
PLEKHA3  
POGK  
POMK  
S100A7  
SELENOH  
SF3B6  
SMIM24  
SNHG29  
TAS1R2  
TECPR2  
TMEM128  
TTC33  
TXK  
ZFP14  
ACTB1  
AIRN  
CAPNS2  
H2-DMB2  
H2-M2  
IGHA  
MYBPHA  
MYOZ3  
ZFP275  
ADAM18  
AKR1B15  
ALKBH6  
ARHGAP40  
C1ORF159  
FAM169B  
FAM53A  
FTH1A  
GON7  
HBQ1  
MIR484  
MIR505  
MIRLET7G  
MUCL3  
NKPD1  
NPSR1  
PAXX  
PGBD1  
POU3F4  
PRSS53  
RDH12L  
SNX32  
TMEM92  
VPS35L  
ZNF202  
ZNF428  
ZNF684  
DDX60L  
TACR1  
CARD9  
FSD1L  
PDE11A  
SLC5A2

TACR3  
TRIM5  
RNF113A  
ALKBH5  
ALX4  
ASB16  
CCDC121  
CCDC14  
DNAJC30  
ECRG4  
FAM234A  
GPBP1L1  
IGFLR1  
INTS5  
KHDC4  
KIF17  
KLHL3  
KLRG2  
NPFFR2  
PDE6A  
RPL36AL  
SYT15  
THADA  
UBP1  
ZNF423  
CCDC113  
SLC18A1  
SPDEF  
ZMIZ2  
ZXDC  
MMP26  
CTBP1-DT  
GALNTL5  
GPHB5  
IGKV3-4  
INSL5  
OLFR114  
SERPINA1F  
SPDYE1  
TMSB4Y  
CLEC4B1  
DHX32A  
HMGA2-PS1  
ID2A  
LGTN  
NEUROD6B  
PRRXL1  
RGS7BPB  
RT1-A3  
ZFP768  
ASB15  
C8ORF33  
CLEC18B  
CTRB2  
G6PC2  
GGTLC2  
KLHL24B  
KRTT1C19E

LGALS7B  
NSFB  
OTOR  
PABPC1A  
PCOTH  
SERPINB6C  
SLC5A4B  
SNORA70  
TRIM43  
TTC24  
TUBA4B  
WASHC2  
ZFP709  
BRME1  
C16ORF91  
HLX1  
KRT18P55  
LCE1A2  
NFE2L2B  
TDO2A  
TMEM211  
ZFP160  
ZFP58  
ZNF471  
BSX  
F8A  
ZFP697  
DHFR2  
NAT8F3  
AKAP5  
CACUL1  
CCDC81  
CCL21A  
DNAH7  
GADD45BB  
GBP  
GJD3  
KLF11A  
LOXHD1  
MIR370  
MIR638  
MYH13  
PCDHA3  
PLAAT2  
PYM1  
QRICH2  
RNASE2A  
SERPINA1D  
SPPL2B  
SVOPL  
TBATA  
TCF24  
TNFRSF26  
ZNF236  
ZNF777  
ZNF831  
ZSCAN25  
EFCAB10

FAM155B  
GPR61  
HFM1  
NR1D2A  
NXPH2  
PSMA8  
TEX101  
ZBTB9  
FT  
BSDC1  
CNTN2  
MEGF10  
ADAMTS19  
ASXL3  
ATP8A2  
BEND4  
CCDC112  
CIBAR1  
CLEC2B  
CRTC1  
DUSP12  
EML5  
FASTKD3  
GCFC2  
GLYCAM1  
HCRTR2  
HS3ST5  
KCNMB2  
MCPT8  
MIRLET7I  
MRGPRF  
NFKBIL1  
PLAC1  
PRR3  
SLC23A3  
SLC25A6  
SLCO1C1  
TADA1  
TMEM161B  
YTHDF1  
ZBTB32  
ZNF589  
ZNF638  
MSF  
PRSS28  
RNASEKB  
DEFB18  
MTUS1A  
RPS27.2  
IGSF21B  
MIR378  
MAPK14B  
SAT1A.2  
FIP1L1A  
PRAC2  
ELAVL2  
GABRA6  
IRX4A

MRGPRH  
MT4  
MTA2  
DUXA  
EPA4B  
HMP19  
KIAA0087  
KRTAP2-2  
OR5K2  
OR8D2  
TUBA7L  
FAUB  
KRTAP9-3  
DRR1  
KRTAP10-10  
RBMXL3  
IFNA7  
OR2T11  
AIRE  
LTB4R1  
MIR452  
ADAMTS17  
ADCK3  
APLF  
C6ORF141  
C9ORF24  
CBLN2  
CHRNA10  
CHST4  
CPAMD8  
CRYBA1  
ELP3  
EPS15L1  
FAM155A  
FCER2A  
HYPK  
MIR379  
MRM1  
MYL5  
NAA25  
NEK5  
PHKG1  
SERPINB7  
SMARCD3  
SPRYD3  
STOX1  
TRIM62  
TSR3  
UST5R  
ZFYVE9  
ZNF85  
ARHGAP5-AS1  
CA14  
CAPS  
CCDC38  
CCNB3  
CTCFL  
DENND11

GPRC5D  
KCNH4  
KIAA1549  
LINGO3  
LYPD5  
MBOAT4  
MC3R  
MIGA2  
NEU4  
NT5C1B  
OGFOD2  
PROKR1  
PRR32  
RCE1  
SAMD3  
SNORC  
TMEM181  
TPGS1  
TUSC1  
ZBTB42  
ZFP318  
ZKSCAN2  
ZKSCAN4  
ZNF266  
ZNF286A  
ZNF597  
ZSCAN22  
ANG2  
FAM104A  
TDRD9  
ZDHHC15  
ZNF114  
ZNF432  
ZSCAN10  
ESR2A  
ALB1  
ZP2.3  
PYGMB  
AGXTA  
GNG13B  
ZFP574  
ANO9A  
ATP1B1A  
C17ORF67  
CATSPER4  
CD209G  
MKRN2OS  
SIAH1B  
SNORA75  
TRIM61  
ACP4  
ANTXRL  
CRNN  
CYP2A13  
GPR152  
PCDHA12  
POM121L8P  
SMGC

SPEM1  
ST20  
STKLD1  
TRIML1  
ZNF771  
CASC3  
ERLEC1  
GCNA  
HNRNPCL1  
IGFL3  
LSM1  
PTGDSB.1  
PXDNL  
R3HDML  
RBBP8NL  
RMRP  
SERPINA1L  
SUMO4  
ZFP120  
ZFP512  
ZNF440  
ZSCAN4  
BBS10  
CAMKV  
CCDC87  
CLEC2I  
CST11  
CYP2B19  
DMC1  
EP400P1  
ERV3-1  
GLYR1  
LCE2B  
LGR6  
LMX1B  
MADCAM1  
NKAIN3  
PCDHGA7  
RGSL1  
SPDYA  
SSC5D  
TFG  
TMEM200A  
TRABD2B  
ZNF431  
SH3TC1  
TNFRSF4  
ZC3H12C  
COA4  
MIR148B  
TRIM50  
WFDC17  
ACTRT2  
B4GALNT3  
BCLAF3  
C1ORF52  
CARNMT1  
CCDC142

CCDC158  
CYP2W1  
FAM83E  
GJA8  
GPALPP1  
HPF1  
IL1RAPL2  
JHY  
KDF1  
KRT77  
LRRTM4  
MPX  
MTG2  
PNMA8A  
PODNL1  
RAD9B  
SLC16A6B  
TMPRSS11D  
UBAP1L  
ZNF248  
ZNF443  
C2ORF15  
CCDC163  
CCZ1  
CD160  
DPH7  
IFITM10  
PMP2  
POLN  
PROSER3  
SCRT2  
SPAM1  
ESR2B  
SYNRG  
AGTR1B  
ANKLE1  
C16ORF72  
CRTAM  
CWF19L2  
CXCR7  
DNAAF2  
GVIN1  
HSP70.3  
ICAM4  
KNOP1  
LAYN  
NMBR  
TOR4A  
AGBL4  
ALPG  
ANKRD35  
ATXN7L3  
CCDC157  
H4C15  
IPO8  
LMNTD2  
MPL  
TCAF2

THUMPD2  
TM4SF20  
ZFP422  
ABITRAM  
ACAP1  
ACTR3B  
ALKAL2  
ARMT1  
ATP2C2  
CALML3  
CAPN12  
CCDC24  
CEP120  
CRYGD  
DZANK1  
FAM98C  
GBX1  
GPRASP2  
H1F10  
H2BS1  
HROB  
IGIP  
KRT73  
LAX1  
MYO1A  
OTP  
PAGE4  
PIK3R3A  
PPIP5K2  
PPP1R37  
PSPN  
RIC8B  
SHHA  
SNHG4  
SYNPR  
TAC3  
TIFAB  
TINCR  
TMEM167B  
TRAPPC11  
TREX2  
VWDE  
ZNF689  
ALLC  
SVS5  
ZFP101  
PPARB  
RGSL2H  
SLC16A9  
ZFP598  
ZFP689  
ZFP775  
ATP1B2B  
CYM  
H2-KE6  
MIR129-1  
MIR1306  
SLC15A5

SLC22A18AS  
SPON1A  
SYPL  
TUBA8L4  
ZFP11  
ZFP668  
ZNF429  
ABCB6A  
ALDOCA  
CDR1  
MTMR8  
PPP4R1L  
PRG1  
PRPS1L1  
RAB39  
RAET1L  
RHOX9  
SLC22A24  
WBP2NL  
ZFP142  
ZFP692  
ZNF354B  
ATP6V1AB  
ATP6V1BA  
CST5  
DGAT1A  
FAM71F2  
FAM83C  
GLIPR1L1  
GSTA.1  
KCNA10  
KIAA0408  
LNP1  
LYZL1  
MOV10B.1  
NUAK1A  
PIRT  
PITPNAA  
SLC2A11L  
TBL1Y  
TSPO2  
ZFP746  
AMD2  
CCDC89  
CYP2AA12  
EXOC3L1  
GAREM2  
REREB  
SLC4A9  
TMEM114  
TUBA3C  
UFSP1  
ZFP236  
ZFP536  
ZNF320  
ZNF687  
ZNF846  
NMRK2

ADAM33  
CATS  
CDKL1  
CLCNKB  
CYB561D1  
GDPD3  
GJC2  
GPR17  
GST-4  
SCD5  
ZFP467  
CAR7  
FABP7A  
IL36RN  
KLRA22  
MIR361  
PTF1A  
ALKBH4  
ATP4B  
BARX1  
C1ORF53  
CBLN3  
CCDC181  
CTXN3  
DNAH3  
FAM98B  
GLRA2  
IPW  
KIAA0319  
METTL14  
MTMR1  
PCDHB14  
RGD1305347  
SMLR1  
TMED1  
TSPAN32  
URM1  
USP35  
WTIP  
ZNF131  
ZNF260  
ZNF326  
ZNF609  
ZNF746  
ZNF77  
ATRAID  
CMTM5  
FAM151A  
IGLON5  
RUBCNL  
SERHL2  
SLC5A10  
TTC30A  
XKR6  
ZC3H12D  
ZMAT4  
TAS2R108  
NDR1

PLCH2A  
SCN3A  
MIR293  
RN4.5S  
CACNG3B  
PRPS1L3  
UBAP2B  
ATP8B5  
CRLF2  
FPGT  
HERPUD2  
NDNF  
PTBP1A  
SNORD118  
TCFAP2B  
ZNF451  
CALY  
EIF1AD  
MAMLD1  
RPS7P5  
SYT1A  
VSIG10  
ZC3HAV1L  
ZFPM2A  
ZNF224  
BMPR2A  
CNBPA  
FGF13A  
MTVR2  
NSFA  
SNX10A  
SP8B  
H2-D4  
UBE2DNL  
HBB-BT  
MFGE8A  
RORAA  
SYT2A  
KIF2B  
MAGEB4  
P2RX4A  
PPP1CAB  
PRAC1  
RDH10A  
SMCO2  
XPO1B  
ANP32D  
CLDN15LA  
KRT91  
RPL23AP53  
SELENOJ  
ZFP398  
LGALS3B  
PIWIL3  
R74862  
RAB40A  
SCARNA16  
STON1-GTF2A1L

TEX55  
CATSPERG2  
DLEU2L  
NOTCH1B  
OR7E91P  
CT55  
CYP27A7  
FAM9A  
LUZP4  
TP53TG5  
TRIM51  
KCNJ15  
PLA2  
GLRA4  
MCHR2  
ZFP641  
AHR2A  
BLF  
C2CD4D  
GPX4B  
RGD1310507  
TRIM42  
APOBEC3  
CYP2B12  
EDDM3B  
GSDMEB  
KLK1B24  
RPE65A  
SDR42E2  
ZFP213  
ZFP518A  
ZNF544  
ACSL1B  
BTLA  
CLNK  
CNPPD1  
COX5AA  
HEPHL1  
LILRB4A  
MIR1275  
MIR28  
MOGAT3  
SLC25A15B  
TPI1B  
ZNF250  
ACTR3C  
AGBL3  
ARL17A  
C7ORF57  
CACTIN  
CBWD3  
CIB4  
CYP2K21  
D5ERTD579E  
EHBP1L1B  
ELNB  
FCNB  
GDPGP1

GJA1B  
GSTT1A  
HN1L  
ITPR1A  
KLF14  
LAMTOR4  
LCE3D  
LILRB1  
LINC01588  
MAMSTR  
MIR30B  
MORC2-AS1  
MUC19  
PCDHGA8  
PDZD3A  
PLA2G4D  
PLA2G4F  
RHPN1  
RNU11  
RSBN1L  
RTN4RL2B  
SH2D1B  
SHARPIN  
SLA2  
SLC38A8  
SLCO1D1  
SOHLH2  
SPACA5  
STK24A  
TBX4  
TLDC2  
TMC3  
TMEM248  
TMEM72  
TNFRSF23  
WDR20  
XCL2  
YBEY  
ZFP871  
ZNF713  
CNTN5  
COL19A1  
CSL  
FAXC  
FYB2  
GPX1B  
GSX2  
KLHL35  
LDLRAD1  
LY6H  
MAP3K21  
METAP1D  
MIR335  
MIR374A  
NDST4  
OXLD1  
PRR4  
RTL5

TLX3  
TSPEAR  
UFSP2  
UNC45A  
ZNF165  
ZNF75D  
GALNT13  
HLA-DQA1  
IL17RC  
SEMA6B  
SUPT16H  
ZMYND15  
OPRK1  
NUP62  
ABCA13  
ADGRB1  
FAM193A  
FXR2  
ODAD4  
MTMR14  
NUDT11  
REM2  
GRIFIN  
EMC7  
RHOX5  
ACR  
AIPL1  
C1ORF226  
CFAP43  
CYP3A  
FAM71E1  
LY6G6D  
MIR374B  
MIR483  
NME8  
NPAS4  
NRG3  
PCDHB7  
SRY  
UPK3B  
ZNF37A  
ZNF385D  
ZSCAN20  
ARMC7  
C2ORF68  
C8ORF58  
CA1  
CA11  
CDPF1  
HTR3B  
TMEM216  
UEVLD  
USH1G  
ZNF493  
TMEM252  
ASPHD2  
BGLAP3  
CNOT3

CYP2D2  
LY6K  
MIR449C  
MYH8  
RX3  
SAP25  
SIN3B  
YIPF4  
FBXO40  
PEG12  
PTCD1  
SBP  
USP29  
ZFP827  
CXCL12A  
ICN  
MIR203A  
MIR489  
MMP23B  
POTEE  
RGD1310587  
RT1-N1  
SPRR2C  
ADGRF3  
ASCL3  
C11ORF86  
C16ORF70  
COX7A2A  
FBXO48  
GIMAP9  
GIMD1  
GPRIN2  
KRT84  
OPN1SW  
PMS2P5  
SPANXD  
ZNF496  
ZNF850  
CYGB1  
FAM181A  
FAM86B1  
FBXL21P  
IGFL1  
IGK  
KEAP1B  
LCE3A  
LINC00324  
MROH6  
PMT  
PNMA6A  
RGD1310352  
SLC49A3  
TAF3  
TMEM31  
TMEM39B  
ZNF329  
ZNF354C  
ZNF407

ZNF626  
ZNF691  
ZNF700  
ADGRD2  
ASAH2B  
BCYRN1  
CCDC191  
LRRC37A3  
PAPOLB  
RFX8  
TMEM250  
TSSK2  
FOLH1B  
TVP23B  
ACTBL2  
ANO5  
ATOH7  
BRD9  
CERS1  
FAM78B  
FAM83B  
FBR5  
MSH4  
NDUFAF7  
OPA3  
PIH1D2  
PUDP  
ZDHHC12  
ZNF483  
ZNF91  
ZSWIM8  
AMZ1  
ANOS1  
CRACD  
DAW1  
GANC  
KRT81  
ODR4  
SRSF12  
TMEM129  
TMEM219  
TRAPPC12  
TRIM66  
WNK3  
ZNF254  
ZNF37BP  
MACC1  
HCAR3  
RPGRIP1L  
TDRKH  
MIR181A-1  
RAET1D  
CIR  
MIR572  
CA10A  
SNORD49A  
TRY10  
MIR194-2

SNORD38A  
ANK2B  
ATP5MC3  
DCUN1D1  
KLHL41  
NRXN1A  
PIGC  
RFX3  
SMARCA5-PS  
TFAP2B  
BMP7A  
DIRC1  
MTB  
SPSB3A  
CES2G  
CYP2D1  
HSD17B12B  
MIR331  
MUP20  
OLR1375  
PUSL1  
SNORD59A  
TCFL1  
ABCG3  
C22ORF46  
DENND4B  
DLC  
GLUD1B  
HLA-DOA  
HSP70L  
LINS1  
MEF2B  
MIR676  
NOA1  
PERM1  
PIK3R6  
PRELID1  
RFT1  
SRPR  
TCIRG1B  
ZBED2  
A2ML1  
ALDH2.1  
APOBEC4  
CLCA4  
DYNLRB2  
EMR4  
GSG1L  
JADE3  
JAKMIP3  
LCE2D  
NAIP6  
SPDYC  
TMEM178A  
UCA1  
ZBTB49  
CLEC-3  
H2BC20P

NDUFS8A  
OR2H2  
SNORD116-13  
SSX3  
WASH2P  
DNMT3BB.3  
EXDL2  
HAND2-AS1  
MIR16-1  
SLC16A9B  
ZNF137P  
AK6  
AKAIN1  
AQP7P2  
C1ORF68  
COL1A1A  
DDTL  
KIAA1456  
MT1IP  
PCDHB17  
PSG3  
RTL10  
SLC25A31  
ANXA1B  
C1QTNF8  
CP110  
F13A1B  
H2-EA  
METTL24  
OR8I2  
PCDHB21  
PGPEP1L  
RTN2B  
SLC25A38A  
SOCS1A  
VTG3  
ZNF177  
ZNF439  
ZNF577  
AFG3L1P  
C3ORF18  
C6ORF136  
FEZF1  
FHL5  
GRID2IP  
HGC6.3  
ITLN3  
KLK1B16  
MIR656  
NAA11  
NOBOX  
OVCH2  
PATL2  
RPL26L1  
SH2D6  
SLC22A7A  
SMIM12  
TPMT.2

ZFP316  
ZNF767P  
ABCC6P1  
C6ORF89  
IGFL2  
MIR128-2  
PSAPL1  
TRHR2  
TFAP2D  
PLCXD3  
MTERF1  
NFATC2IP  
AHR2  
HMGCR  
IL20  
NDST3  
OTOG  
PDZD7  
PPP1R3E  
RGD1309534  
SIGLECH  
CFAP70  
CLHC1  
DBNDD1  
EML6  
HOXD13  
JAKMIP2  
JPH4  
KCNH8  
L3MBTL4  
NRSN2  
NUDT10  
SHISAL1  
TMEM132E  
WRAP53  
ZC3H10  
ZNF264  
PLA2G3  
CSH1  
ARL13A  
CD209C  
KRT42  
LILRA2  
DSG4  
ERMARD  
IFNK  
MIR30C2  
RGD1309350  
ROM1B  
ZFP35  
ABP1  
ARMC12  
CFAP221  
CYP2D11  
DUOXA2  
KIAA2026  
LINC00597  
LY6B

METTL25  
RLN3  
RNF175  
RSPH10B  
SFTPA2  
SIRPB2  
SLC2A15B  
SMIM10L2A  
ZG16B  
ZNF212  
ATF5B  
BRF1A  
FAM151B  
FRRS1L  
H1-1  
HPDA  
LHFPL1  
MFSD12A  
MIR381  
NRN1L  
PFKMA  
PSG1  
SEPW1  
TEX37  
TSKS  
ACRV1  
CCDC154  
CCDC178  
CCDC74B  
CLDND2  
HMGXB3  
JMJD7  
LRRC18  
NLRP7  
NPM2  
PCDHGA1  
RHCGL1  
TVP23C  
ZNF426  
ZNF614  
ARFGEF2  
CYP2A3  
HBZ  
LEKR1  
LY6G5B  
PCDHB8  
PLA2G2F  
POU1F1  
PRDM15  
SMG8  
TACR2  
ZFP28  
ZPLD1  
BMT2  
CCDC153  
CEACAM5  
DNLZ  
FAM131B

FAM71F1  
FOXO6  
FRA10AC1  
MIR320A  
MT1HL1  
MUSK  
PTCHD1  
RADX  
TCFL5  
TMEM223  
TMEM38A  
VPS26B  
WASHC2C  
ZFP57  
CFAP69  
ENGASE  
GRIP2  
KCNH6  
MYORG  
RNF32  
SLC6A15  
SYNPO2L  
TOP2  
KCNC3  
PRIMA1  
CDHR1  
NPRL3  
FOXF2A  
MACROH2A3  
CATSPER2  
NTN1A  
UBE2E3  
ARHGEF11  
ERMN  
FAM177B  
MIR198  
MIR1981  
POLR1G  
AMIGO1  
ARPIN  
ARXES1  
BLOC1S3  
BTBD17  
CYP4F12  
DOP1A  
FAM171A2  
FANCM  
MSANTD4  
NBAS  
NKAIN2  
ODAD2  
RNF41  
RNVU1-7  
SLC36A4  
SLC9A5  
SLIRP  
SNHG6  
STK36

TBC1D32  
TMEM242  
UNK  
ZNF721  
SMR2  
SNORA2A  
ATP5MC3B  
KIR2DL3  
MUP18  
REG3D  
ZNF229  
CFAP54  
H2AC22  
MIR3473  
MIR540  
SPPL2C  
HER6  
KLRA12  
RT1-DMB  
SERPINB3A  
TMEM253  
ZFP384  
CYP2AA2  
GLT6D1  
MIR302B  
MIR412  
RNASE13  
ZFP560  
ZNF665  
BTN1A1  
CRYBB1L3  
EBLN2  
FZD8A  
IGKV6-14  
LDLRAD2  
LECT2L  
OR7E13P  
SERPINA3A  
SNORD50A  
ATP2A2A  
EHD1A  
EPHX5  
FNDC10  
FREM1  
GPR89  
LRRC19  
MIR629  
MROH8  
NTD5  
OVCH1  
SLC25A25A  
SLFN1  
ZNF449  
C22ORF39  
C6ORF118  
CCDC190  
CD300C  
CDCP2

CNTNAP5B  
ENO4  
FAM186B  
GBP8  
GML2  
GPR31  
GRCC10  
IFITM7  
IFNA4  
IL31  
LRP5L  
MIR487B  
MSX3  
PABIR1  
PSMG3-AS1  
PTTG3P  
SEMG1  
SLC22A29  
SMTNL1  
SRSF8  
TAAR2  
TERB1  
TMEM200B  
UGT1B5  
ZBED5-AS1  
ZFP329  
ZKSCAN6  
ZNF319  
ZNF414  
ZNF524  
AKAP3  
C1ORF105  
C22ORF23  
DRC7  
EGFL8  
HSP90AA1.2  
KIAA1958  
KRT74  
LGALS3BP.1  
MINAR1  
MINAR2  
NOX3  
OC90  
PCDHB10  
SERF1  
SERINC4  
SERPINB13  
SLC2A11B  
SMIM30  
SNORD17  
TAS2R4  
TCL1A  
TMEM61  
UGT5A2  
VRTN  
ZBBX  
ZFP710  
ZNF776

ADAM29  
AKAP4  
AP5B1  
C8ORF74  
DUSP21  
GLRXP3  
MSC-AS1  
ZFP748  
ZNF30  
EML2-AS1  
ENDOV  
FOXB2  
OR5P3  
RNF222  
SNORD15B  
KC6  
GRK1  
APOL2  
EFCAB1  
IL17F  
MAU2  
RETNLB  
TFA  
ZP2  
AP1AR  
H2AC12  
H2AC19  
KRT78  
MAP9  
MOB2  
POU2F3  
SNHG5  
TRMT1L  
ZBTB39  
PPOX  
SLC5A7  
HTR2C  
LOXE3  
MBL-1  
GBP9  
CYP19A1A  
ABHD12B  
RWDD4  
SNORD123  
GP1BA  
MIR652  
MIR760  
PIGG  
ZFP354C  
FPR3  
IL27  
PABPN1L  
SERPINA3F  
UTS2B  
ZNF555  
ABHD18  
ACSBG2  
AGBL1

AGXTB  
AHS2P  
AMZ2P1  
CCDC102B  
EFHC2  
ERAP2  
GIPC3  
H2AC17  
LATS1  
MEAK7  
MIR346  
MKS1  
PMCH  
PRSS57  
RBM41  
SAMD13  
SFRS6  
ST20-AS1  
TEX15  
TMPRSS13  
TMSB15B2  
ZNF225  
ZNF623  
CKMT1B  
CLEC12B  
CNGA2  
DISP3  
GPR6  
KCNK18  
MIR100HG  
MYLIPB  
PAAF1  
PPAP2B  
SFRS3  
SPATA21  
SPATA22  
SPO11  
SQRL  
ZNF197  
ZNF365  
ZNF415  
ZNF549  
CLVS2  
DPY19L2P2  
MYO3A  
STAG3L1  
ZNF76  
SEC14L5  
CYP4A6  
AHR1B  
ZFP113  
COA1  
HAAF  
C1ORF112  
CD8B  
MGAT5B  
MICU2  
MIR126B

RBFA  
RBM42  
SLB  
ASIC4  
CCNQ  
FAM174B  
FAM221A  
FGD2  
INTS4  
LIN28B  
MORN4  
TMEM254  
UBXN8  
MIR679  
DP1  
HNRNPA0B  
MAGEC1  
ZFP111  
ATP2B1B  
FGFBP2  
LGALS6  
OAS1G  
TRIM60  
COL9A1A  
DEDD1  
HIBADHB  
KLRA9  
KRTAP8-1  
OXCT2B  
PTGDSB.2  
SULT3ST4  
TNXBA  
WFDC13  
ABCG3L2  
HMGB1P1  
IGSF22  
MFAP1B  
PRSS42  
SLCO1A3  
ADKB  
GZMF  
LINC00652  
MIR216A  
PNMAL2  
UBE2D2A  
USP41  
ZFP358  
CYCT  
GST-1  
LDB1A  
NME1-NME2  
RDH18-PS  
ZNF821  
APOL10B  
CRP3  
GJA6  
GUCY1A3  
IQSEC3A

MIR217  
NFIxB  
PLOD1A  
RHOX10  
RIC1  
RS1A  
TLCD3B  
TMSB  
ACTL8  
C17ORF59  
C1ORF162  
COX8C  
CTSL.1  
DRL  
FAM228B  
FMN2B  
ITGB2L  
LOH12CR2  
MILL2  
MIR101C  
MIR1-1HG  
REP15  
SH2D1A  
SMCO1  
TCEANC  
TMEM241  
ZBTB37  
ZFP317  
C3ORF33  
FAM69B  
FDPSP2  
HIGD1B  
ITPRIPL1  
KCNV2  
KIF19  
LRRIQ4  
MMP21  
NPW  
ODAD1  
PGK2  
PTX4  
SPATC1L  
ZFP941  
ZNF34  
ZNF775  
C8ORF31  
CEL.1  
FCRLB  
FTL2-PS  
GPR149  
KCNB2  
LINC00052  
LINGO4  
MIR9-3HG  
PEDS1-UBE2V1  
PNP4B  
PPIAL4A  
PROP1

RALAB  
SHISA7  
SOX9B  
UMODL1  
USP32P2  
ZNF121  
ZNF550  
CDK15  
CEACAM4  
CTU1  
CYP2AA1  
GBGT1  
NRAV  
PROX3  
TMEM150B  
TMPRSS12  
ZNF3  
ZNF800  
APOBEC3H  
CTBP2A  
D1PAS1  
IZUMO2  
RETSATL  
SAGE1  
D10WSU102E  
MIR6956  
GPM6BA  
MIR6328  
RBM48  
ATP8  
CCDC174  
DEFB15  
EMSY  
GNAT3  
KCNK9  
MIR1190  
MTNR1B  
SLC4A5  
SLCO1A5  
USP12B  
ZKSCAN5  
CCSER2A  
CNNM1  
CYSRT1  
ERICH1  
FANCF  
NUDT2  
PRAM1  
RPRML  
ZFP709L1  
BRD1A  
OXR1B  
SPRED2A  
STK17AL  
PRAMEF7  
DEFB35  
GNSB  
DEFA-RS12

EEF1A1A  
MUP-PS16  
RAB10OS  
RHOGD  
BRIP1OS  
H2-M10.1  
SIGLECF  
ZNF106A  
MSP-113  
SGSM1B  
SLC38A3A  
SV2BA  
ALDH3B3  
ARVCFA  
MIR196A1  
NDUFA9A  
PHB2A  
ZNF41-PS  
MCTP2B  
OR10G7  
SUMO1P1  
TAS2R140  
RGD1565356  
SIL  
CYMP  
RAB3AB  
TRPC4  
MUP-PS14  
SLC17A6A  
DCD  
LINC00326  
OR2A7  
SCP2-PS2  
ZNF408  
OR2G6  
PRR23B  
PVALEF  
ZNF146  
BTR02  
CBLIF  
CXXC4  
DCTN1B  
DRAXIN  
HSPA7  
LCA5  
PAPPA-AS1  
SETD1A  
SNORA36C  
TREM3  
ZNF592  
ZNF681  
AKNAD1  
CCDC78  
CRFB2  
MIR671  
OCM  
P2RY11  
POU5F2

RAB6D  
RGS9BP  
RIIAD1  
ZNF324  
C2ORF69  
C9ORF152  
EMX2OS  
GTSF1  
GUCY2F  
HMX3  
KCTD16  
MAIP1  
MIR363  
MYPOP  
NR2E3  
OXGR1  
SERPINB11  
STARD7-AS1  
ZCRB1  
ZFY  
ZNF384  
ZNF551  
ZYG11A  
GCH2  
IGFL2-AS1  
KCNAB3  
LINC00543  
LINC01597  
MCMDC2  
ODF1  
SHISA6  
STX19  
TSNARE1  
CATSPERG  
PMCHL2  
ZSWIM1  
TMEM95  
BCL11B  
TSP1  
OBP1F  
GABARAPL3  
H2-Q4  
ZFP429  
CYP3A37  
MIR196A-1  
ZNF655  
BTBD8  
CYP3A62  
DRC3  
FAM216A  
IGHMBP2  
TRP63  
ZFP125  
CLDND  
CSHL1  
HIGD1C  
NXPH4  
OVOL2

PART1  
WFDC16  
ZNF24  
ABCA1B  
FAM228A  
SNORA54  
HLA-J  
ASB13A.2  
CAR10  
CYT1  
MGAA  
SOX2OT  
CGB5  
FUT5  
GOT2B  
GPR116  
HIST2H2AA2  
KLRA2  
MIR762  
MUG-PS1  
OLFR1260  
OLFR1383  
SLC25A32A  
TNXA  
TTC30A1  
ZFP930  
DNMT3AB  
MCIDAS  
RAET1G  
VTNA  
ALDH1A4  
BZW1A  
C9ORF129  
DEFA4  
DGCR6L  
HSD11B1LA  
KIAA1614  
MYCNOS  
SCGB1D4  
TOB2P1  
ZFP865  
A  
ASB16-AS1  
DEFB132  
DYDC1  
GST-5  
H4C17  
LINC00473  
LINC01140  
MHC1ZBA  
NAPAA  
PSORS1C1  
RHOBTB2B  
RNASEL3  
SULF2A  
VIRMA  
ZFP579  
C11ORF45

C6ORF15  
FOXQ1A  
IGLL3P  
KRTAP2-4  
MAPK1IP1  
PCDHGB5  
SLC25A53  
TEDDM1  
UBL4B  
ZNF541  
ZNF671  
ADM5  
CCDC159  
CELA2B  
CNO  
H1F1  
MIR592  
PPDPFL  
PRINS  
TAL2  
TEX13A  
TRIM40  
XGB  
ALDOART1  
C1QL4  
CAR12  
CST1  
FAM219B  
KIF25  
MEIS3P1  
MIR744  
PCDHGA10  
RSPH3  
SLC35G3  
TKTL2  
TRIM65  
BPIFB3  
DBIL5  
DNMT3BB.1  
KRBA2  
LAIR2  
LINC00525  
LINC00638  
LRRC37B  
MOCS3  
MTRES1  
OAZ2B  
OPALIN  
PTPN20  
SNORA65  
VWA3A  
ZFP185  
ZNF133  
ZNF730  
ZNF761  
CABP7  
GSDMB  
HBD

KCTD18  
MCRIP1  
PCDHGB6  
TIGD3  
ZNF273  
ZFP143  
INO80D  
NTF4  
QARS1  
TNFA  
BARHL1  
GHSR  
NKX2-2  
PLCH1  
SLC24A4  
TRPA1  
GPR55  
SUPT20  
UFL1  
FANCE  
HIST1H2BQ  
HSP-16.1  
TNFSF18  
KLRA16  
MIR32  
NLRP5  
PER1B  
TTN.2  
ZNF10  
FAM183B  
FNDC11  
MFAP1  
MIR187  
MIR877  
PGA5  
PRRT4  
SIMC1  
ZNF234  
ACP7  
BRSK1  
C12ORF75  
COPRS  
CRISP1  
LCE1B  
MCPT2  
MIR376C  
PPP1R36  
RNF151  
H3C11  
MCM9  
R3HCC1L  
HRCT1  
MIR125B-1  
SOD-2  
CYC  
PRLH  
ERICH6  
PCDHA5

SOX11A  
SULT2ST2  
AKAP17A  
C1ORF50  
HERC2P2  
MIR350  
MS4A2  
RPS26L  
DEFBL1  
FAM122A  
TEFA  
TPTEP1  
ABCA10  
CCDC166  
MIR463  
CALR3B  
COL6A4  
DCST2  
DEFA-RS2  
EEF1DB  
IFITM4P  
MIR377  
PPDPFB  
ZNF135  
AKP3  
APEG3  
EXOC3L  
GTF2IRD2B  
ICAL1  
NDRG1B  
NKX2-9  
PSG19  
RNU6ATAC  
S100A10B  
UCHL4  
UQCR  
XLR4B  
ADRB2B  
BACH1A  
BCO2A  
C20ORF96  
C9ORF50  
CYP4V7  
FAM81B  
GJA9B  
GPR78  
HULC  
MIR92A1  
NAMPT1  
PLD1B  
RFPL3S  
RGD1306271  
RXFP4  
SELENOP2  
SLC5A4  
SPECC1LB  
SSTR5-AS1  
TMPRSS13A

TXLNBB  
XIRP2A  
ZNF720  
ANP32A-IT1  
CLPSL2  
CST2  
CYP2AD2  
DGAT2L6  
FAM86B3P  
FLG2  
FOXR1  
GJB7  
KIR3DL2  
MIR372  
PLA2G4E  
PPEF2  
RPS2P32  
SLC36A3  
SOX19B  
TSBP1  
VTGA2.L  
WDR64  
WEE2  
ANKRD30A  
C1ORF43  
CAPZA3  
CFHR5  
H2-Q8  
KRTAP5-5  
LCE3E  
MAK10  
NOP14-AS1  
NPFFR2A  
NPY6R  
RFWD2  
WDR49  
ZFP39  
CALHM1  
GYPB  
HAPLN1A  
MIR181B1  
PCDHGC5  
PTTG2  
RNU12  
C9ORF40  
EVX2  
GSC2  
HOXA6  
METTL21C  
MSX2P1  
SLCO1A6  
SMIM20  
TRNAU1AP  
UST4R  
ZFP629  
ZFP830  
ADGRA1  
ANGPTL5

ATP13A5  
CASP5  
CCAR2  
DNAJB3  
FRS3  
HEXD  
HRH3  
MIR7-3HG  
MRGPRG  
RTL9  
ZNF100  
ADAM7  
CYP2K19  
NCR3  
PRADC1  
SFT2D3  
SYT11  
V  
ALOX15B  
H2BC17  
NRIP2  
RBP5  
TAF8  
VWC2  
VWC2L  
ZFR2  
ZNF211  
BTBD16  
CYP2P7  
NEURL4  
PTPRV  
SLC52A3  
ADAMTS3  
CAVIN4  
CNTN4  
RGD1564865  
C4ORF3  
H2BC1  
MZB1  
XIRP2  
C3ORF38  
FAM204A  
GPX-5  
LRRTM3  
MYZAP  
NOX5  
RIBC1  
TMEM121B  
TMEM198B  
TRIR  
TXLNGY  
VSX2  
CLTCL1  
FAAP100  
KXD1  
RFX6  
TECRL  
TOGARAM2

ZFAND5A  
ZNF557  
JMJD4  
NAALADL2  
RNF214  
ZFP69B  
CARMIL3  
OTOGL  
PPARDA  
TPRB  
CYP2K5  
DAK  
KIR3DL1  
ZNF799  
TP53AIP1  
CAMK2D2  
DLG5A  
FHOD3B  
CCDC37  
HMGB1A  
KRTAP19-1  
MSANTD1  
PARP  
SMYD2A  
FOXO3B  
NUCKS1B  
OLR701  
SPINK6  
SULT1A4  
TXNDC8  
ABCB11A  
CLDN3D  
DPYSL5  
FAM187B  
ITM2CB  
KBTBD13  
LIMS3  
MTHFD1A  
RAB33A  
RAP1AA  
RTL4  
SCG2A  
ZFP202  
ANKRD36BP1  
APBA1B  
C8ORF44  
FLVCR2B  
HER7  
KLK1B22  
PRX  
SUZ12P1  
AQP7P1  
C6ORF226  
CCDC140  
CCL23  
CFAP299  
DA2-19  
DUSP22B

JUPB  
LDHBA  
MYST2  
N6AMT2  
NPSN  
PPIAA  
PRPS1B  
RTN4B  
SCARNA9  
SFXN5B  
SLC7A5P2  
SNORA80A  
TMEM273  
TRPM4A  
ZNF536  
C3ORF22  
CA4A  
CYP2C53-PS  
GRHPRB  
OLFM2A  
PHACTR3A  
PRDM8B  
SMCO3  
SSMEM1  
TEX13B  
TXNIPB  
WDYHV1  
ESPNL  
KLHL38  
LRRC74A  
NAPSB  
ODF3L1  
PPIEL  
RBPMS2B  
SNORA38B  
SPACA4  
SSX8P  
TCEAL5  
TMX3A  
UBE2Q2P1  
VTG7  
ZNF610  
BDNF-AS  
IQCN  
NBEAA  
OLFR644  
TCEAL4  
WDR97  
ZFP770  
ZNF391  
GK2  
NOLA3  
ONECUT3  
TMC2  
VOM1R76  
C2ORF74  
CIRBPB  
HSP-16.2

PYCR3  
RND3A  
ABHD10A  
ADAMTS15A  
ARL9  
ASIC1B  
NRDE2  
SERPINB9F  
WDR79  
ZCWPW1  
ZNF274  
IL36G  
INKA1B  
PLEKHD1  
RGD1565695  
SLC22A16  
ATP5G3  
BSP  
CACNG3  
CFAP65  
FAAH2A  
FSCN1A  
HDLBPB  
IGG-2A  
NAV2B  
NUDT17  
PPP1R9ALB  
TMEM191B  
UCKL1  
ZNF436-AS1  
ADA2  
EFCAB6  
IGK-V8  
KRT92  
LMOD2  
RIMS1A  
RMC1  
SUZ12A  
USB1  
ZNF519  
ZNF672  
ASCC1  
EPHB4A  
LMO4B  
MNF1  
MROH7  
SLAMF8  
SNORD73A  
STXBP1B  
ATP6AP1L  
GON4L  
KIF1AB  
ZFP108  
ADAM28  
BACH  
CES1H  
SCN1BA  
CCDC192

EFNB2B  
HTRA1A  
MEI-41  
MEI-9  
MSP-10  
MSP-51  
PRAMEL6  
ZFP313  
AIR  
BIN3-IT1  
BTR12  
KDM2BB  
MIR103A2  
NMT1A  
OTUD5A  
AKR7A2P1  
CYP2P8  
DEFB123  
GPR148  
MIR1910  
OLFR55  
PROM1A  
DNAJC3A  
PALD1A  
UBE2D2L  
CST9  
MUP-PS12  
OR5H1  
SCGB1B2  
SEMA3AA  
C1ORF100  
CLCA3P  
KRTAP6-3  
MIRLET7A1  
MN1B  
PEAK3  
REG1CP  
TSPAN16  
OR5H14  
BPESC1  
KRTAP12-3  
KRTAP4-2  
KRTAP4-5  
LCE5A  
LINC00242  
LINC01555  
NRXN1B  
OR2J2  
OR51V1  
OR6K3  
OR8B12  
SNORD115-5  
SSX5  
TIEG3  
TMEM176L.2  
ZNF560  
DEFB115  
DULLARD

MIR627  
OR5A2  
DCLK1B  
MIR181B2  
PRL2C2  
SLC34A1  
SOUL5  
MIR663AHG  
NCRUPAR  
SNORA59A  
SNORA59B  
ZFP874A  
ADGRF4  
LINC00588  
LINC01508  
LUARIS  
OR12D3  
PIWIL4  
TPRG1L  
ZFP2  
ZNF833P  
BRK1  
CDK11A  
GTF2IRD1P1  
INE2  
MIR323  
TCTN3  
TMEM251  
ZIK1  
ZNF678  
FBXO7  
MIR133A1  
SMG9  
TEX14  
ZNF124  
ZNF518B  
NMRAL2P  
PEX10  
PLPP7  
RLN2  
SAMSN1A  
SNORA28  
THAP6  
VOF16  
CDRT4  
CRYBGX  
MSANTD2  
NLRP2  
PRSS21  
SPANXA1  
SULT3ST3  
AHRRB  
FAM216B  
GATA2A  
KLRA8  
OLFR544  
IL11A  
MEP1A.2

MIR1247  
ACP5A  
ARHGAP29B  
CARMN  
ENO1A  
EPDL2  
HCG18  
LRRC16A  
MIR216B  
RSPO4  
YY2  
ZNF2  
DPPA5  
GCNT7  
RGPD5  
THAP8  
TTC34  
AHR1A  
BHLHA9  
BRE  
MTMR9LP  
NAALADL1  
PPP1R3DB  
PRAMEF12  
TBX10  
TMEM232  
ZNF230  
CCDC73  
GSTM.1  
KLLN  
LGALS2A  
SAGA  
SMIM10L2B  
TAAR5  
TSIX  
WDR67  
ZNF445  
DBH-AS1  
EYS  
KLK12  
LINC02693  
OSBP  
SULT1C4  
THEG  
USP28  
ZFP94  
ZNF677  
GNAS-AS1  
GNG10  
H4C13  
IDI2  
NKX2-4  
RNR2  
TPM4A  
C10ORF95  
C3P1  
ZNF568  
ZFP326

SOD-3  
C18ORF25  
CENATAC  
TRIM46  
C4ORF33  
EPOP  
HMOX1A  
ZKSCAN7  
C12ORF4  
EIF2D  
MIAT  
PLPPR5  
RAMAC  
SNF8  
TTC29  
CCDC74A  
PRRT3  
TMEM220  
TTC22  
LRFN5  
MIR3102  
CHIL1  
RNVU1-18  
ARR3A  
LRATA  
MIR449A  
MRLC2  
SERPINA3H  
TRIQQ  
CCIN  
CNTD1  
GPR174  
MALSU1  
MFSD14B  
MIR590  
SLC7A13  
VIT-5  
WDCP  
ZSCAN18  
BORCS8  
CDC2L1  
CRYGF  
GPR143  
MMEL1  
MS4A10  
MYCS  
PPP1R26  
SLC35D3  
ZFP319  
ZFP652  
ZNF331  
ADGRE2  
ATF7IP2  
BMI1A  
DNAI2  
IFT43  
KIAA0895L  
NFAM1

PRAMEF8  
SBK2  
SMR3A  
ZFP41  
ZFP758  
ZNF358  
ZNF804A  
APOA4B.1  
ARMCX6  
C2CD4B  
CEBP1  
CLRN1  
HES7  
PRL6A1  
SEPTIN10  
SLC6A19A.1  
SPANXC  
SPATA1  
TYMSOS  
USP9Y  
ZFP51  
ZFP945  
ETV5B  
FKBP1AB  
GLI4  
LINC00339  
REG2  
RGD1305464  
STC1L  
ZNF25  
AGPAT4-IT1  
AHRRA  
C16ORF89  
CYP2AA3  
FAM120AOS  
FCRL1  
OPN4  
SLC9B1  
SNORA73B  
ZNF19  
CCNI2  
DRD3  
FAM104B  
FAM209B  
GLIPR1L2  
SRARP  
TSPEAR-AS2  
ZFP516  
CTSJ  
CYP3C1  
LARGE  
LRFN2  
MARCF10  
SCARNA2  
SERTAD4-AS1  
TAS2R10  
TSACC  
HN1

PGAM4  
RSPH6A  
TMEM215  
ACSM2B  
FAM133A  
PKD1L1  
VDRB  
ZNF45  
MIR3074-1  
CYP8B  
BIRC5B  
C7ORF26  
EFHB  
ASIC3  
CA5B  
HARBI1  
LYPD2  
MUP17  
NEMP2  
PAQR5A  
TRPC7  
C1QL3  
DEFB12  
FSCN2  
OLR649  
PCP2  
SRSF3B  
SYCP2  
CD33  
EID2B  
ERMAP  
KRTAP20-2  
NRGNA  
SLCO6C1  
TUBA4L  
KIAA1671  
OLR288  
PLK  
GSTP3  
NECTIN3B  
ORG  
USP49  
CHIA.3  
MIR1  
MUP16  
NSD1A  
OLR544  
MROH9  
NMES1  
RB  
UGT2B3  
VMN1R51  
GNAO1B  
IP6K2A  
IP6K2B  
KIR2DL1  
MGAT1A  
PROM1B

ATP6V1C1A  
CUTAL  
KSR1B  
MIR193  
MSI2B  
NOP9  
MARCKSA  
MYCLB  
RFX1B  
RNF225  
SCARNA15  
ACAP3A  
APOL10A  
HNRNPA3P1  
MICALL2B  
NTNG2A  
PPP1R14BA  
SNORA38  
SNU13A  
SOX6OS  
SULT2A3  
CYP2C66  
MIR466B-1  
SLC6A20A  
ZAR1L  
AMTN  
ANXA2R  
CRY1A  
CYP3A73  
EEF1A1L1  
FCRL3  
G6PC1A.2  
GLSB  
MIR667  
SNORD54  
ZBTB2A  
ZNF648  
C19ORF18  
CLDNA  
DDX43  
DEFB41  
DPY19L2P4  
HNRNPH1L  
MSTNB  
RASGEF1BA  
SPANXA2-OT1  
SYNE1B  
ADH8B  
ATP1A3A  
CD27-AS1  
DIO3OS  
HSD17B12A  
KRTAP17-1  
LMAN2LB  
MARCKSL1B  
MIR576  
OR5W2  
OR9G4

SHOX  
SNHG3  
TMEM88B  
TSPYL6  
ZCCHC13  
APOA4B.3  
ARIH1L  
C11ORF87  
FOXN3-AS1  
FUCA  
GPRC6A  
GYG1A  
KCNE1L  
LPPR1  
OLFR281  
SNORD114-1  
SUB1B  
TGM7  
TMEM35  
ZFP273  
ZNF747  
C17ORF58  
CTSLB  
HIST2H2L  
IL17B  
KCTD19  
LVRN  
OPN1MW2  
PAGE5  
TARP  
TUBA3E  
ZKSCAN17  
ARIH2OS  
C3ORF80  
CEBPZOS  
CENPBD1  
CYREN  
DEFB19  
DSG1  
GPR171  
KIAA1755  
MMP20  
NTAQ1  
NYX  
PRR14L  
SNORA29  
TSPAN7B  
ZNF788P  
B3GNT4  
C10ORF88  
C15ORF61  
CRCT1  
CTS7  
HS3ST4  
HSD11B1L  
INSRA  
KRT9  
LINC00174

MIR518F  
PPA1B  
QKIA  
RGD1559459  
SPATA46  
ZNF740B  
ZNF883  
CCL19B  
CSMD3  
CYORF15A  
DHRS7L1  
EAR4  
FRMPD2  
GSP-4  
KIF26BA  
MAP3K14-AS1  
MORC1  
MSP-33  
MSP-45  
MSP-49  
MSP-56  
MSP-57  
MSP-64  
MSP-81  
NEURL1AA  
OLFR1274  
OR2M1P  
OR7E24  
SNORD89  
SPAG17  
SSP-10  
ZNF530  
CD300LD  
KIAA0895  
MEIS2B  
MIR1268A  
NKX6-3  
PSMD11B  
RP1  
SIX3B  
TAS2R19  
UGT1B1  
ZFP410  
ZNF425  
ATG4DA  
OLFR154  
PAGE2  
PDLIM5B  
RNF5P1  
RTN4A  
SLC8A1A  
TMEM196  
ZKSCAN14  
IGKV10-96  
IGKV15-103  
LINC00528  
LINC01093  
LYVE1A

RBM39A  
THSD1P1  
ACOT16  
FAM69C  
GCSAML  
MIR1-1  
MSRB1A  
NLK2  
OR1C1  
OR2A4  
RPL7AP36  
SERPINB14  
SLC16A12A  
SUPT4B  
ZBTB16B  
CHKB-CPT1B  
SLC35G6  
TGIF2-RAB5IF  
KRTAP24-1  
NPBWR2  
DCAF8L2  
DUSP29  
GBGT1L4  
KRTAP12-1  
KRTAP12-2  
KRTAP4-12  
KRTAP4-8  
KRTAP9-8  
MUC5.2  
NLRP13  
OBOX2  
OLFR846  
OR11A1  
OR51S1  
OR52E4  
OR52L1  
OR5T2  
SNORD115-6  
TAS2R1  
BCO2L  
CGB8  
EBLN3P  
PPP3R1A  
PSG11  
SNORD93  
ZFP954  
CDKL4  
CYP2AA7  
EMBP1  
FKBP9P1  
HSP70.2  
SMIM10  
ASCL4  
HTR3D  
HTR5B  
LINC01505  
MAGEB6  
OR11L1

OR5H6  
SLC25A5-AS1  
SNORD103A  
ANKRD40CL  
AOX2P  
FAM183A  
H2-EB2  
MIR3646  
OR10G4  
OR4D1  
OR51A2  
TAAR3  
ZFP85  
ERCC6L2  
COG2  
LGSN  
LRRC10B  
PABPC1L2A  
RUNX1-IT1  
ZNF436  
UNC80  
IL9R  
RGD1563941  
AVPR2  
KLRA17  
NCBP3  
TASL  
ZNF768  
FOLT-1  
OL-VIT1  
RDH10B  
TP73-AS1  
GP5  
PPP3R2  
TMEM260  
ZFP628  
C2ORF42  
PCDHA1  
RIPPLY1  
TIMM29  
ZNF385C  
ZNF830  
BOD1L  
C5ORF46  
CD300E  
HORMAD1  
KCTD12B  
SNX31  
TUBB8  
AND2  
C1ORF56  
C1QL2  
ITPRID1  
MBD3L2  
RAX2  
SYT16  
TXNDC2  
UBE2CBP

ZBED9  
ARSL  
PDK2A  
PLP1B  
PRSS30  
WDR38  
ZFP606  
A2ML  
CDRT1  
LINC00673  
RGD1311946  
SPIN3  
C6ORF58  
CCDC70  
DCAF16  
ETV7  
GTF2A1L  
H3F3C  
SFTA1P  
C5ORF51  
CBX7A  
DMRT3  
IQCC  
MIR3085  
PWAR5  
RNF17  
SOX9A  
TMEM101  
DCDC1  
DHRS13L1  
H3C6  
IL19  
PGLYRP3  
TCEAL7  
INIP  
MIIP  
RAG2  
LARS1  
MAPK1IP1L  
WDR13  
ZNF160  
CRB1  
MED8  
MIR669N  
PRR12  
PHRF1  
MBL  
HSP7C  
MC4R  
ZNF112  
HSC70-PS1  
VED  
OTOP3  
SNORD43  
SOWAHCB  
FAM43B  
KPNA7  
MEX3A

MIR199A2  
MIR219A-1  
MIR3475  
ZNF57  
CHIL4  
CST4  
SYS1  
TOP1L  
CABP4  
CYP2C23A  
DUSP23  
KRTAP19-4  
MIR1915  
PTGS2B  
UBE2IA  
CZIB  
IGFN1.3  
KLRA4  
LINC00526  
OLFR569  
PCDHA10  
TIMP2B  
ZNF587  
ZNF839  
CFAP410  
HMGB2A  
OLR828  
PLIN  
RT1-CE16  
SPATS1  
AQP10  
CAVIN4B  
CRABP2A  
GPR15  
H2AC16  
HMGA1A  
INSYN2A  
MIRLET7C-1  
PFN3  
RP1L1  
TCRB-J  
TUBA3D  
XRR1  
ZFP763  
AIFM4  
PRR33  
TMEM102  
ZFP119B  
BPIFB2  
BPIFC  
CYP4F17  
ISX  
KCNJ6  
KRT76  
LRR1  
MIR665  
MRG1  
PTPN23A

SEPN1  
ZFP819  
ZNF282  
ZNF486  
CATSPER1  
CDCA9  
DCAF1  
DDX53  
EIF4E1B  
GPR32  
MAGEF1  
MAP1LC3B2  
SVILA  
THAP10  
ZNF304  
ZNF853  
APOL11B  
CA10  
D5ERTD605E  
FAM186A  
LRRIQ1  
MIR1226  
MMP1A  
OPN6A  
RDH8A  
SFRP1B  
SLC12A10.3  
SLC35E2A  
SMAD3B  
SNORA71A  
TDRD12  
ZFP282  
ZNF350  
ZNF585A  
BSNB  
CARNS1  
HDLBPA  
MIR1983  
OLFR206  
ZNF674  
ZNF844  
COL28A1  
D9WSU90E  
HNF1A-AS1  
LY6G5C  
OXCT1B  
AKAP1B  
ELOCA  
MIR466J  
NPCD  
PTBP1B  
SLC6A1A  
SNORA6  
CHTF8  
FUT8A  
MIR712  
OCLNA  
OLFR1381

OLFR558  
SMARCAD1A  
SNORD4A  
SNRPD3L  
SPEF2  
CDKN1BA  
CES2F  
DNMT3BA  
ETL4  
HCFC1B  
HSP90B2P  
IST1  
MARCKSB  
PLVAPB  
RND1B  
SHDB  
ZNF296  
BCL11BA  
CD82B  
FBXW15  
IQCA1  
MIR466G  
MKNK2A  
PRKCBA  
SLC1A2B  
SLC6A4A  
ECRG4A  
IFNA5  
IFNE  
IGKV19-93  
MMP  
NFASCA  
OLR1517  
PRODH1  
PVALB5  
ST18  
GPM6BB  
PFN2L  
SNORD38B  
TAS2R137  
TERA  
ARL8BB  
C11ORF53  
CASR  
JARID2A  
TEN1  
TRP53I13  
ATP5S  
MSP-142  
MSP-152  
MSP-19  
MSP-3  
MSP-40  
MSP-53  
MSP-55  
MSP-59  
MSP-65  
MSP-76

MSP-77  
MSP-78  
NFIXA  
RGD1560925  
SOBPA  
AHSG1  
CACNA1DA  
CAPN3B  
GST-30  
OR2T4  
PRELID1A  
SDK1A  
SDZ-8  
SH2D3CA  
TEX44  
TNRC6C1  
UCK2A  
UGT-48  
ZEB2OS  
ZNF322P1  
DNAJC3B  
GNG12A  
LRRD1  
PSG23  
SNORA60  
SNORD116-2  
VTNB  
BAMBIA  
BTF3P11  
C17ORF64  
FAM86JP  
GRNA  
HOXB5OS  
IQCF3  
LINC02875  
POLR2J2  
RGD1308134  
ZFP383  
ZNF343  
C9ORF131  
FKBP10B  
KTN1-AS1  
MIDEASB  
MIR211  
MIR518C  
MIR663B  
RGD1560883  
TMEM213  
TRGC2  
VCX  
ZNF66  
COL1A1B  
COL2A1A  
DEFB104B  
DHRS13A.2  
F55G11.2  
GLNS-PS1  
JUNBA

PER1A  
POTEC  
SPEM2  
CTSBA  
EFCAB13  
HSFY2  
IRG1L  
LINC02870  
MIR672  
MXRA8A  
NUCB2B  
OR10G2  
PABPC1L2B  
RBMV1A1  
SNORD34  
TCL1  
TRIM6-TRIM34  
ZNF35  
INAFM2  
KRTAP10-7  
MYHC4  
OR52B2  
PDHA1A  
SHISAL2A  
SNORD3A  
WDR95  
ZNF271P  
AADACL4  
ANXA11A  
BTNL3  
C10ORF67  
CSAG1  
DEFB113  
FRMD1  
GOLGA2P5  
IGFN1  
KRTAP10-6  
KRTAP10-8  
KRTAP4-4  
KRTAP7-1  
LINC00671  
LINC01121  
OOSP2  
OR10V1  
OR11G2  
TCL6  
TFIP11  
ZNF559  
ZNF679  
ANGPTL2B  
C5ORF38  
CNGA4  
CYP4Z1  
DESI1A  
HIPK4  
IGKV12-46  
MMP23A  
PTPN4A

RNF227  
RPL13AP3  
RRNAD1  
THAP12  
TTC6  
ZFP235  
ZNF513  
ZNF658  
ZNF792  
C16ORF92  
CARD18  
CYP3A57  
GPR119  
IDI2-AS1  
MBLAC1  
PLPPR3  
PRORS1  
SLC25A36A  
SLC4A10  
SNORA27  
SNORD116-22  
TOGARAM1  
ZNF653  
ANKRD65  
C8ORF34  
EVPL  
LINC01239  
LY86-AS1  
MIR589  
PDHA2  
RP9P  
ZNF280A  
ZNF484  
C10ORF90  
MZF2B  
OGFR-AS1  
PNMA3  
SOD2-OT1  
TYW1B  
UCMA  
ZFP87  
ZNF280B  
C1QTNF9  
CCER2  
CFAP61  
CYP6G1  
HPDB  
LINC00475  
STK31  
USP27X  
ZFP595  
CYP6A2  
ANKDD1A  
RT1-M3-1  
RASGEF1A  
GPR21  
HER3  
KLRA15

KLRE1  
TOMM70  
AKAP14  
HBA  
KDM5BA  
MIR582  
PCDHA6  
TUBB2C  
WNT8B  
KLK1B3  
MIR199B  
SAAL1  
SAXO2  
TRAC  
KIAA1143  
MIR190B  
MIR295  
RGD1561157  
ZNF335  
AHR1  
FBXO24  
GUSBP4  
MIR879  
SPART  
ZFP157  
ZNF583  
KIAA0586  
LRRTM2  
MRGPRX2  
PACRGL  
SPATA19  
TAS2R114  
ZNF302  
ACNAT1  
CCDC160  
GARRE1  
GBAP1  
WASH5P  
ZFP3  
ZNF708  
ANXA2A  
FAM217B  
NRARPA  
TMEM145  
TMEM270  
TMEM35A  
ZNF184  
KLRI2  
MIR9-1HG  
PADI6  
SIX7  
ZFP189  
ZPBP2  
C16ORF74  
MKI67IP  
TRIM30B  
ASF1BA  
BPIFA2F

CNGB3  
NEDD4A  
ACAD12  
P22K15  
ARPC5B  
OLFR342  
AMA-1  
GUK1B  
IFNA14  
LDHBB  
NEUROD6A  
RLBP1A  
SYT5B  
C1RB  
DCANP1  
DEFB4  
SNORD56  
ZFP691  
CXCR4B  
DDX39AA  
MICAL3B  
MYCH  
RGD1308065  
STX11A  
TMEM269  
BPIFA3  
CHIA.4  
MIR1948  
OLFR47  
TNNI2B.1  
TPI1A  
ZFP867  
OTULIN  
PRODHA  
RGD1309540  
TAK1  
ADIPOR1A  
CHI3L4  
GCM1  
MIR706  
NDRG3A  
OLFR1215  
C1ORF131  
PBLD1  
PCDHGB8  
ZFP931  
CCNP  
CTSLA  
KRT38  
OLFR460  
OR52H1  
PDCD4A  
RNU4-2  
SPIN  
TSSK5  
CAPZA1B  
CBWD  
CDH15

LSMEM2  
MYO15AA  
OLFR738  
SIR-2.1  
AMY2A3  
ARHGEF17  
CCDC44  
KNDC1  
PTGES3B  
SLC2A11  
ZNF317  
ZNF731P  
CCDC105  
CCDC13  
CSPRS  
IGHG2B  
KRT24  
LILRB2  
MFSD14A  
MGL2  
OPRPN  
SNORA3A  
IGHG2A  
MRPL42P5  
NBR2  
NPIP7  
PATE4  
PPP2R4  
RNASET2A  
SNORD55  
ALDH9A1B  
ATP2A2B  
BOLA2B  
CASTOR3  
CPSF7  
ELOVL6L  
GID8  
GST-12  
MID1IP1B  
MSP-36  
MSP-50  
PLEKHG5A  
RNF148  
TMEM14B  
USP2A  
ZFP609  
ZNF621  
ZNF7  
C6AST4  
C7ORF50  
CCR9A  
DMRTC1  
FOSL1A  
IMPG1  
OR4K2  
PNPLA1  
SURF4L  
TLCD4B

ZNF738  
ADAM6B  
AK8  
CXORF38  
GTF2H2C  
LCE4A  
OR1A2  
PAGE2B  
SLC4A2A  
SOX2-OT  
TMEM170A  
ZNF204P  
ZNF441  
ZSCAN5B  
ARMC3  
BANF2  
C12ORF29  
CFAP57  
FANCD2OS  
MAP3K15  
MIR373  
OLFR70  
OTT  
PHOSPHO2-KLHL23  
PRR36  
SLC9A4  
TADA2B  
TMEM233  
TOMM20L  
ZFP119A  
C11ORF91  
CAPN13  
COPS9  
EMC3-AS1  
MGST3B  
MIR138-1  
NANSA  
NR5A5  
OR6A2  
RN7SL1  
SIGLECE  
SLC38A5A  
SNORA63  
TSGA8  
YWHAEP1  
ZNF695  
AIM1L  
C11ORF42  
C2ORF66  
CDR-1  
CGB2  
CYP2AA4  
DOD-24  
GPR75-ASB3  
HLA-DQB2  
HRH4  
IL26  
KHDC1L

MIR600HG  
OR1I1  
POM121C  
PRB3  
SP9  
ZFP791  
ACBD5A  
H2BP1  
IFIT1BL1  
MIR1307  
MIR659  
N4BP2L2-IT2  
OR10J3  
PCDHGA6  
CUL1B  
LCE6A  
LINC00574  
MROH5  
MTERF1A  
NPAP1  
PSG2  
RPL23AP82  
SIGLEC16  
SLC25A41  
TEX19.2  
TEX21  
AGAP6  
BRP16  
EGFBP2  
H2-T24  
HSP70.1  
IRF1-AS1  
LCN4  
MAGEB3  
SLC25A47A  
SNORA8  
SNORD116-21  
TMPRSS11BNL  
TSPAN19  
ZFP36L1B  
DEFB25  
DHRS4L2  
HPS6  
LINC01133  
TSSK1B  
ADORA2A-AS1  
C10ORF71  
CELA3A  
FAM153CP  
GIOT1  
MIR616  
ANG3  
C9ORF43  
CASP16P  
CECR7  
CLEC9A  
MT1DP  
OR2B2

SPATA16  
C11ORF80  
RGD1309362  
SNHG10  
GPR22  
NLRP10  
RTP1  
SMDT1  
ZFP69  
FCAR  
PDF  
ATP5MJ  
C17ORF80  
C9ORF116  
MIR197  
TPI  
ZDHHC24  
ZNF542P  
CRACR2A  
NUPR1L  
PYCRL  
STAG3L4  
C2CD4A  
FCRL5  
LURAP1  
SNHG16  
TGM6  
ZNF664  
AFDN-DT  
CES5A  
KIAA1191  
SPRR2A2  
ZNF805  
ADGRG5  
CFAP73  
CPNE9  
GJD2  
IL31RA  
ZBTB47  
ZNF714  
CD200R1L  
DLGAP1-AS1  
ZNF480  
MAGEA10  
HSP47  
CLDNG  
HBAA1  
SCD4  
SPEER4D  
MYL6L  
ZNFL2A  
GRIN1B  
PCDHB19  
TIMP2A  
EFNB2A  
EGL-1  
INKA1A  
MYLIPA

UQCC  
FGFBP2B  
H2AC21  
HMGB1-PS7  
MIR448  
PRP15  
RS5-8S1  
SNORA84  
SP5L  
SPON1B  
TULP1A  
CAR6  
CYT1L  
LPCAT2B  
MIR8114  
PISD-PS1  
RPL3L  
TRIM30A  
DLGAP3  
ELOVL7A  
OPN1LW2  
SLMAPB  
CRYGM4  
CYP2B23  
KLRB1C  
MIR466I  
SKIA  
CFAP298  
CGB1  
PMELB  
RBM11  
SLC27A2A  
SNORA72  
ANXA2P3  
BABAM1  
MED14OS  
RARAA  
ZFP347  
ZP3B  
ZRSR1  
GPAT2  
IL11RA2  
MIR1180  
BZW1B  
CCDC61  
CYP2AA9  
HD  
LEMD1  
MIR486  
MIR669C  
OLFR915  
PPP1R3CA  
SNORA47  
SVS3B  
TENT5BA  
ZFP518B  
ZNF395B  
BIN2B

C14ORF28  
CES1A  
CTSLL3  
FAM3D  
OLFR749  
REX2  
S100A10A  
STMN4L  
TCRD  
TRGV9  
UCN2  
ZNF485  
ZNF74  
CCDC33  
FABP1B.1  
GRIK1A  
MMP13A  
RT1-M6-2  
RXRGB  
SLC26A9  
SLC46A2  
SNORD46  
TMEM179  
ZP2.2  
AHR2B  
C18ORF54  
C2CD4C  
CELP  
HMT-1  
HOXB5B  
LMO4A  
RRN3P3  
SNAI1A  
UNR  
WDR87  
ZNF605  
ZSWIM2  
CLDNE  
CYP4T8  
DNAH14  
OLFR1316  
RGPD8  
SLC7A5P1  
SNORD74  
STATH  
HCN1  
LCN9  
SERF1B  
SNORA14B  
TERB2  
TTI2  
EFNA1A  
KRTAP19-5  
SCINLB  
TAS1R3  
CYLC1  
FAM105A  
LCE1A

PYDC1  
RGD1565222  
ZEB2A  
BXDC5  
EIF3J2  
GJE1  
MXC  
ZNF876P  
C17ORF75  
C1ORF167  
CSRNP1A  
GADD45AB  
OR10J5  
RAB11AL  
SERPINB1L3  
SYNGR2A  
YWHAG2  
CNTNAP3  
CSTL1  
DDX26B  
DHRS13A.1  
GOLGA6A  
GST-7  
HR96  
MIR322  
RPL37RT  
HEATR2  
KLRA21  
MIR155HG  
POTEB  
ZFP959  
ANKRD60  
CCDC27  
LGALS14  
LINC00477  
OR2B11  
TDRD10  
CAM  
D6WSU163E  
GPR151  
SLC35D1B  
ANKRD19P  
AQP12A  
C20ORF27  
FGF20  
GGT8P  
MORC2A  
RGL4  
TMEM170  
ANKRD66  
CATSPERE  
CCDC162P  
CYP1D1  
HECTD2-AS1  
KDM4D  
KIAA0430  
KLRC3  
LUCAT1

MIR380  
MS4A8  
SID4  
TDPOZ2  
TMEM51-AS1  
ZNF793  
APCDD1L-DT  
DPPA2  
PAPD5  
PCDHGB1  
PDXDC2P-NPIP14P  
ZNF222  
C1ORF94  
TDRD6  
HTR4  
POSTNA  
WFDC21P  
ZNF141  
C11ORF49  
FAM72D  
GFRAL  
KRT39  
PSORS1C3  
VMN2R29  
ZFP790  
ZNF572  
ZNF670  
DGKK  
FBXW10  
MEIOC  
SMIM15  
SMIM5  
FCGR2C  
ACIN1B  
FBLL1  
RNASE2B  
FBXL22  
SNORA55  
ZNF680  
SNHG28  
CRABP1A  
CRYGM5  
ABCD3A  
MIR33  
STAG2A  
AVD  
CDH9  
LONRF1L  
LOXL3B  
MUP12  
PRSS34  
GNGT2A  
H1F8  
NFKBIAA  
OR4D6  
VEGP2  
ENTPD2A.1  
RAB32A

SLC16A9A  
SMIM38  
ZNF668  
AKAP12B  
ATF4B  
NRXN3A  
NXPE5  
ZP1  
ACIN1A  
ACLYA  
CYP-35B1  
FGF22  
METTL4  
PJK  
PRSS54  
C3ORF14  
CASP3A  
DENND6A  
PYK  
RNASE12  
SEC22BA  
TARM1  
CRYGN2  
KIAA1586  
MIR215  
MIR298  
PRL2C4  
SEPT5B  
SNORD21  
TEKT4  
TLR10  
DENND10P1  
MILR1  
MIR743A  
NT5C2L1  
TPGS2  
ZFP764  
COLCA2  
DEFB42  
HDR  
ZFP46  
ZNF138  
ZNF235  
ADAM26A  
APPA  
CLCA4A  
DCDC2C  
HOTAIRM1  
PLEKHS1  
POT1A  
SNORD3C  
TMIGD2  
TOB1A  
CFHR3  
G6PC1A.1  
MIR30C1  
MT  
RAB39B

RIMKLB  
RT1-CE12  
SNORD35A  
PARA  
KRT40  
KRTAP21-1  
OLFR780  
ACTA1A  
ANKRD20A8P  
CHKB-DT  
GIMAP2  
LY6G6F  
MAGEA2  
METTL2B  
MIR942  
OLFR46  
PMS2P9  
THAP7-AS1  
ULBP3  
ADKA  
ARHGEF9A  
CAMKK1B  
CAX2  
CYP2K20  
DBNLB  
GST-38  
HIPK3A  
MHC1LAA  
MIR207  
NOTUM1B  
OR128-3  
OR2F1  
RHOL  
RN18S  
RTN1A  
SLC1A9  
SLC2A9L2  
SNORD13  
SRD5A2A  
TRIM25L  
TSPAN34  
ZFP27  
ZFP788  
ZNF81  
GLYATL3  
RAB2  
CEACAM8  
CETN1  
DAO.2  
FAM66C  
IFRG15  
NIPSNAP  
OOEP  
ZFP36L1A  
ZFP60  
ZGLP1  
ZNF584  
ZNRF4

ANXA5B  
CHASERR  
FOXI3  
KRT82  
MAGEB18  
ODAPH  
PCARE  
UFD1L  
CD74B  
DNAJA3A  
DPY19L4  
PGM5P2  
PYURF  
STPG2  
C19ORF48  
C1ORF158  
CST9L  
KIRREL  
MIR1260B  
NCR2  
PAX6A  
SNORA24  
COX4  
CTAGE4  
FGF7P6  
HIST1H4B  
LASS6  
LINC00938  
LIPI  
MAGEA11  
MIR511  
MROH2B  
PRSS30P  
RBMXL2  
ZFP956  
ADH8A  
ANDPRO  
BPIFB5  
C17ORF99  
C22ORF34  
FAM170B  
KRTAP4-1  
MUC21  
PBX1A  
PDC  
PMP22B  
SLFN12L  
SUPT20H  
TPRXL  
CASPB  
CYP27C1  
LRRC46  
MISP3  
SNORA10  
SNORA31  
ZNF774  
NUPR2  
OLFR458

OSTCP1  
ZC2HC1B  
ARL16  
HHLA2  
STAG3L3  
SYCE1L  
WBSCR17  
ZFP445  
ZNF433  
ZNF528  
ZNF808  
ZNF829  
ADGRE3  
LINC00470  
NKAPL  
RGD1311739  
ZNF385A  
HOXA-AS2  
KCNA6  
LINC00844  
PLGLB2  
MIR1894  
SLC2A3P1  
AGBL5  
HIST1H2BG  
IL17RA1A  
C11ORF68  
IQCH  
MIR504  
GNB3A  
HSP-90  
MLL2  
OPRD1  
PRL8A4  
RCVRNA  
ATP1A3B  
MIR137  
OLFR1394  
ZNF791  
EFCAB5  
PROSER1  
PTGES3L  
SIGLEC9  
TAS2R118  
ZFP740  
ZNF92  
ATXN1L  
PIFO  
ZNF770  
ATP10B  
RGD1307100  
RGD1561149  
ZFP385D  
ZFP640  
CTPS1A  
HSP90AA2P  
RGD1562378  
ZNF492

MIR743B  
PABPC4L  
PCDHB6  
PLP1A  
STM  
C1ORF35  
SNORD50B  
FIRRE  
GHRB  
NMUR1  
PCDHB18  
CES2H  
DPY19L1P1  
FENDRR  
GAD1B  
GMNC  
PCDHGC4  
SPATA48  
AND1  
DHRS3B  
HNRNPA1L2  
ITIH3A.1  
LINC00623  
GPR89B  
GUCY1B3  
NPIP15  
PRL2B1  
RLBP1B  
RT1-DOA  
SLC2A4RG-PS  
CD209A  
GNB3  
ID2B  
KLRC4  
OR2A9P  
PP2D1  
RGD1565367  
RT1-N2  
SOGA2  
TPD52L3  
ZFP296  
ASIC4B  
C1QL3A  
C1QL3B  
CCDC53  
CHST3A  
CMASA  
CRFB15  
GBP2B  
GRK7A  
HARS1  
HECW2A  
IKBE  
K6PP  
KCTD9A  
LPAR2B  
LRRC30A  
LRRC8DB

MC5RA  
MFSD6B  
MYBPC2A  
NCANA  
OR2W3  
PCYT1AB  
PCYT1BA  
PIP5K1BB  
RAP1GAP2A  
RNF150B  
SCG2B  
SELENOV  
SERPINE3  
SHISA9A  
STOML3A  
UBE2NL  
UGT2A4  
ZIM2  
EIF3CL  
FAM177A  
GZMD  
NOTO  
RGS22  
ZFP663  
C2ORF92  
KRTAP3-2  
LGALS9C  
LINC01587  
LRRC14  
MTAG2  
PROKR2  
SULT1ST3  
TEKT4P2  
XLR4A  
ZNF22-AS1  
ACCN3  
HS90B  
LINC00641  
NKX2.5  
RN45S  
TUBAL3  
C20ORF203  
CXCR4A  
DLX3B  
GALNT8  
H1F6  
LILRA6  
OR1F1  
RXFP1  
ZNF180  
ZNF213  
ANG4  
CCER1  
WFDC8  
ZFP112  
ZNF268  
ZNF682  
ANKRD33

CFAP91  
FRMD7  
KRTAP6-2  
LINC00479  
LINC01116  
SAPCD1  
TEX29  
CYP-35A2  
DDX19  
KDM6BB  
LCN6  
MIR3091  
MLN  
SH2D1B1  
TBC1D3F  
ANKRD63  
C2ORF49  
CERS3  
ERV3-2  
TRPV3  
ZNF558  
ATOH1  
BORCS8-MEF2B  
LINC00941  
REG1  
SERPINF2B  
SPINT3  
TEKT2  
CSNK1A1L  
GOLGA2P10  
MIER2  
TRHDE-AS1  
AKTS1  
ARRDC5  
CD200R2  
CMLC1  
RGPD1  
TTC35  
ZNF620  
ANXA1C  
BMPR1AB  
MIR186  
CMTM2A  
MEA  
NPM1A  
VOM1R92  
VSTM5  
CFHR4  
KA11  
MCO3  
PRAMEF13  
SLC7A3A  
HOXC13A  
RORAB  
SST2  
GSTE8  
OLFR1402  
RNU2-10

ZMIZ1OS1  
CRYBB1L1  
CSH2  
EIF3S10  
STMN1A  
UQCRHL  
VDAC1P3  
ERICH4  
GHRA  
MESPAB  
BSK  
MIR622  
NCR3LG1  
OSER1-DT  
PMS2P3  
RGL3A  
ACTL9  
CFAP300  
CROP  
HSP90AB2P  
MIR598  
PPP1R9BB  
SNAP25B  
STAT1B  
CDH26  
LGALS1L1  
NPFFL  
PRDX6B  
SLC43A2A  
ZFP870  
APOA4B.2  
ARSK  
EIF4A1B  
GNG13  
IVNS1ABPB  
KLRA3  
WDR27  
APS  
BPIFB4  
GAREML  
H2BC24  
FAM27E3  
OLFR110  
TMEM266  
CREG  
HOXA3A  
IGF2A  
LINC00476  
XLR3A  
H2-Q5  
MIR-375  
REC114  
SSRP1B  
TMEM244  
ZNF1065  
CKMT2B  
CSPG5B  
CYP2AA11

CYP2AE1  
FLOT2B  
KLRB1F  
MCUR1  
MS4A17A.8  
NAT8F4  
P  
PCGF5A  
PPM1LB  
PRTGA  
RALAA  
SDHDA  
SIX4A  
SOUL5L  
SRP54A  
TCRA-V54  
TMEM237B  
ANKRD20A11P  
ARSH  
CLDNB  
FAAH2  
FAM176B  
HES3  
MIR669A-1  
MIR669A-10  
MIR669A-4  
MIR669A-5  
MIR669A-6  
MIR669A-7  
MIR669A-8  
MIR669A-9  
PIMR213  
SPRR2A1  
ZNF12  
ZNF281B  
ZNF782  
ATP11AUN  
CEBPA-DT  
H2AP  
LRRC38  
MIR125B1  
GOLGA6L9  
GRXCR1  
HUS1B  
MIR302D  
MIR6997  
MIR8118  
MSS51  
OLFR156  
SEPTIN12  
AKAP2  
CDR-4  
D3ERTD108E  
DNAJC5G  
LINC00460  
LINC00965  
PYP  
ZNF696

ANKRD34C  
ARSE  
KHDC1  
PPYR1  
SHOC1  
TAAR1  
VOM1R67  
VOM2R11  
VOM2R8  
ZNF181  
ZNF41  
CAMK2N1A  
CUX2B  
CYP2D5  
CYR61  
ENTHD1  
GSTT4  
PARP12A  
ATP8B5P  
CD209  
DELE1  
DVR1  
JPT1B  
KCNU1  
LELP1  
MRGPRX1  
THEX1  
ZNF182  
ARL14  
CBX8B  
CDC42EP4B  
CHD4B  
CYP1A4  
GPA33  
KRT37  
MIR29B2  
PCDH18B  
RAD21A  
RGD1309104  
RRP7BP  
SLFN5OS  
ST7-AS1  
C1ORF74  
CABP7B  
KLK1C9  
OLR776  
RBMS1A  
SLC37A4A  
SLURP2  
TAGAP1  
TRHDE.1  
VSTM1  
ANKRD31  
ATAD3C  
C6ORF223  
CD3EAP  
FLVCR1-DT  
GAREM

LINC01119  
MIR4524A  
NUTM2A-AS1  
RRN3P1  
TMEM190  
CATSPERB  
OPN1LW  
PPNR  
PPP5D1  
TMSB4XP6  
ZBED3-AS1  
GPR179  
OLFR60  
ARHGAP32A  
CLDN23.1  
CYP3A26  
DNASE1L4.1  
IER2A  
KIR2DL4  
MPPED2A  
PHC2B  
RBMS2A  
RGS12B  
UBL3B  
FAM71D  
HOXC12  
MRGPRB11-PS  
TNFRSF22  
UGT1AB  
ZFP446  
ZNF566  
ABCA3B  
GFRA1A  
NEXMIFA  
SCN8AB  
TDG.2  
TRIM34B  
OLR1635  
OLR81  
PAK7  
SPART-AS1  
DNMT3AA  
TLR11  
ZRSR2P1  
BPIFA5  
HSP25-PS1  
LRRC4  
RGD1559600  
SERPINA3I  
ZBTB6  
ZNF627  
CHK1  
EXOC3L4  
LCE3B  
LRRC55  
MIR1896  
OLR124  
OLR1250

OLR215  
OLR382  
PCDHA13  
RGD1559804  
ACC  
ALDOAB  
DCPP1  
ELDR  
IAP  
LYC2  
OLFR52  
TSPAN36  
VTG6  
ABCC6B.1  
BCL11AB  
C14ORF119  
C19ORF25  
FAM156A  
PIMR168  
SMEK1  
SNORA3B  
TMEM88A  
CATSPER3  
DEFB44  
H4C7  
SKOR1  
SQT-1  
ZNF20  
CYP4F41-PS  
FABP3P2  
GPR82  
MIR520H  
NNR  
ARCH  
C80502  
CCDC136B  
CCL21D  
CYP11B  
CYP2AA8  
EPB41L3A  
ERAS  
ISP2  
MAGED4  
METTL7A2  
PHYHIPLB  
PPS  
RGA  
SERPINA3L-PS  
SPATA45  
THBS4A  
GIMAP1-GIMAP5  
LRRC37A2  
PCDH2G28  
RGPD6  
TBX2B  
TRAPPC2B  
WHSC2  
ATAD5A

C9ORF135  
CRISPLD1A  
EFNA2A  
FAM87B  
HE1.2  
INAA  
LSM12B  
PHF20A  
PPM1NA  
PRP19  
PTGER2A  
RCAN1A  
RGD1310495  
RTL1  
RTN4RL2A  
SLC1A8B  
SLPR  
TSPAN13B  
UGT5A1  
ZFAND5B  
ZFP105  
CEP83OS  
COL-173  
EEF1A1-PS1  
NPN2  
RAB7-PS1  
SSP-11  
TTLL8  
UMPK-PS  
ANKRD50L  
CALM4  
CDHR3  
SMIM27  
SSX6P  
ZFP65  
ZNF322  
ZNF841  
SAMD15  
AAT1  
ASH1L-AS1  
B3GALT5-AS1  
CPL2  
CWC15  
ENO1-PS1  
GIPR  
GSTR  
HMX1  
MUP-PS4  
PSMB11  
TNPO3  
ZNF615  
ANO10A  
CDX1A  
EOLA1  
FGT-1  
HEXDC  
KCNN1A  
LINC01089

MIR384  
MYLK4  
OAF4  
OR6J1  
PPFIBP1A  
SET-17  
TPT1-AS1  
TSGA10IP  
YWHAB.L  
CKBB  
IL17REL  
OLFR1080  
RSPH3A  
CDC34B  
HOXB-AS3  
OR10Z1  
TTLL2  
C12ORF77  
CTXN2  
FOLR3  
HELT  
IGLV1-44  
MAP1  
NOTCH  
OXCT2  
SNORD115-15  
SSX9P  
TEX26  
ZFP26  
ZNF474  
ZSCAN29  
AGLA  
AWAT1  
OLFR201  
OR2T2  
SLC38A3B  
TSPAN33A  
WBP11P1  
ZFP711  
AQP12  
C3ORF20  
MUC3A  
OLFR315  
OLFR836  
PRCD  
PSG6  
SERPINB9C  
SYCP2L  
ZNF487  
AJM1  
AMPD2B  
APBA1A  
DYNC1I2A  
ECM1B  
GLS2A  
GNAL2  
ITGAE.1  
KIF16BA

KIF16BB  
LMF2A  
MALRD1  
MPDU1B  
MS4A4B  
NBR1B  
RND1A  
RNF126P1  
RNR1  
SERINC2L  
SLC22A7B.2  
TAS2R16  
TRIOB  
DEUP1  
MIR657  
MIR888  
UGT2B6  
Y59E9AR.1  
ZNF630  
ERICH6B  
FBXW26  
GKN3  
MIR4688  
SNORA2C  
TTC18  
CCDC8  
D1ERTD692  
GABRQ  
IL22RA2  
MAP10  
METTL2A  
SKN-1  
UBA1Y  
ACOT11B  
C14ORF177  
C3A.4  
CCDC106A  
CST13P  
CYP27A1.4  
CYP2X12  
DYNC1I2B  
FCOR  
MIR1256  
MIR1283-1  
MIR142HG  
MIR2052  
MIR320B1  
MIR351-2  
MIR519A1  
MYO7AA  
NSPA-8  
OLFR1382  
OLFR687  
OR2A12  
OR6F1  
OTX2OS1  
RCA2.2  
SNORA71E

SNORD109B  
STC2B  
UGT5B5  
URAH  
ARHGEF33  
CT47B1  
DEFB125  
FAM138D  
KRTAP12-4  
KRTAP5-7  
LBHD1  
MIR7-3  
OR10H5  
OR2T6  
OR4K17  
OR5AU1  
PPY2P  
PRB2  
SPATA31D1  
SYS1-DBNDD2  
TGM2B  
EPA2A  
GYPE  
MIRLET7C2  
OBP2B  
SULT1ST2  
ZSWIM9  
C3-3  
COX4I1L  
DAO.3  
FOXO  
OLR1584  
TCEB2  
CD1C  
EPA10  
GPIA  
MIR378G  
MUP-PS10  
MUP-PS18  
OLFR978  
RPS12L2  
C12ORF63  
CDY2B  
CYP2A7P1  
CYP2K6  
LINC00598  
LINC01720  
LINC01743  
SNORD29  
CYP4V8  
LINC01128  
PRMT9  
ZFP91-CNTF  
DEPDC4  
OR2M7  
PRKCDBP  
ZFP385C  
ABCA11P

ZFY2  
ADMA  
ATP1A1A.4  
CAMK1GA  
CLEC4GP1  
CTSBB  
DAAM1B  
HMSD  
MEP1A.1  
MIR526B  
NFE2L1B  
PRSS37  
RPL23AP32  
SPRR2J-PS  
STAG3L2  
ZNF389  
ZSCAN32  
CD177  
OXSRI1A  
PTRF  
C2ORF27A  
CATSPERG1  
MIR3081  
NBPF14  
SPATA32  
ZFP287  
ALOX12P2  
BRD2B  
IGF2BP2B  
LINC00320  
LINC01366  
LINC01831  
MIR1266  
MIR548I2  
OLFR373  
PAQR9-AS1  
RPL32P3  
SLC7A12  
SNORD114-4  
SNORD114-8  
ZFP36L3  
ZNF735  
MUC12  
NDNL2  
ZNF461  
DCHS2  
LRRC43  
MAGEE2  
MYO1H  
PRKCQ-AS1  
TEX19  
ZNF404  
ALDH1L1-AS2  
AOX3P-AOX2P  
ATP2B2-IT2  
BPY2B  
C17ORF77  
C1ORF220

C3ORF49  
CASC8  
CCDC144A  
CFC1B  
CLPSL1  
CRYM-AS1  
DCAF13P3  
DCDC2B  
DEFB133  
DIRC3  
EIF3IP1  
ESX1  
FGF  
FIGNL2  
FOXN3-AS2  
FRG2DP  
FYTTD1P1  
HPVC1  
IQCA  
KARS1P2  
KCNIP4-IT1  
LBX1-AS1  
LINC00303  
LINC00466  
LINC00519  
LINC00628  
LINC00643  
LINC00971  
LINC01020  
LINC01189  
LINC01194  
LINC01615  
LINC02018  
LINC02044  
LINC02267  
LINC02506  
LINC02520  
LINC02691  
LINC02694  
LINCR-0002  
LIPS-7  
LRIG2-DT  
MFF-DT  
MIR153-2  
MIR5103  
MIR548F3  
MIR7-1  
OR2W5P  
OR52A4P  
OR52E8  
OR5K4  
PAGE3  
PCNAP1  
PER3P1  
PPEF1-AS1  
PSG10P  
RNASET2B  
SEPTIN14

SKINT1L  
SLC26A4-AS1  
SNORD115-21  
SNORD116-18  
SNORD116-3  
SNORD116-9  
SRGAP2D  
SYCE3  
TGIF2LY  
TIGIT  
TTY8B  
APOL4  
GSTD1  
KCNMB3  
MS4A14  
SMR3B  
VMN1R54  
ZNF646  
NGT2B  
TOB1B  
WIBG  
ABHD16B  
C11ORF21  
HLA-DRB6  
MAP3K19  
MRFAP1L1  
NTF5  
SCGB2A1  
ZMIZ1-AS1  
L1MD-TF26  
OLFR1436  
OLFR748  
RT1-N3  
CFAP47  
PCDH11Y  
ZUFSP  
ASIP  
ZNF554  
BTNL10  
CLEC3A  
IQCF1  
NEK10  
RT1-A2  
SERPINB9B  
SLC16A12B  
TRAPPC13  
ZNF576  
DNAJB7  
GUSBP14  
KIFBP  
ADAM10A  
EAR6  
LEXM  
LY6I  
SKINT3  
IGSF23  
LRFN4B  
RT1-T24-4

TKTB  
ZNF18  
CYP-29A2  
FBXO15  
NMS  
NOL4  
FUT8-AS1  
MIR1955  
PCDH11X  
RAD51-AS1  
TAS2R119  
CRY5  
GUCA1D  
KIR2DL2  
KLHL38B  
PHKG1B  
S6K  
CAR9  
OR51E2  
PDXDC2P  
TCRG  
XAGE2  
CALHM3  
OXER1  
PDZD9  
PVALB2  
ZFP780B  
FAM71A  
TSSK4  
OLR1135  
PRICKLE4  
SELK  
ZNF398  
MIR495  
NLGN4Y  
PCDHGB7  
WASHC2A  
CFAP100  
CYP12D1-D  
CYP12D1-P  
LINC01003  
RFPL2  
C11ORF95  
FAM153A  
ZNF106  
GNRHR2  
IGKV1OR2-118  
KRTAP4-13  
MIR18  
OLR104  
OLR1147  
OLR1325  
OLR1439  
OLR436  
OLR610  
PLEKHG4B  
MEL  
MS4A15

PCDHB3  
SLC35D1A  
SYNDIG1L  
ZNF394  
KRBOX4  
MFSD4B1  
NBDY  
P2RY8  
SYT7A  
UGT1A  
CAMKVA  
CSPG5A  
FCRL2  
MIR340-1  
NTNG2B  
OLFM3A  
PCDH1GC5  
RGS5A  
SLC22A31  
TAFA1A  
WASHC1  
ALCAMA  
MIR1825  
ZFP369  
KLRB1  
MIR6215  
SPINK8  
ZFP418  
DUSP5P1  
C4ORF45  
DEFB21  
TBRG3  
TIGD4  
ZFP13  
ZFP868  
ARID3C  
F7I  
HBB-BS  
HNRNPA1B  
IGFBP5B  
C1ORF109  
OR130-1  
POU5F1B  
RAB39BB  
TAX1BP1A  
TMEM41AA  
ZNF134  
ACTL7A  
CACNA1F  
CREBBPA  
FMR1NB  
HSP-6  
IGHV1-56  
MAP1AA  
NHLH2  
RTN1B  
SRSF2A  
TSGA13

ZDHC15B  
GSTM3  
LINC00173  
LINC02210  
PEDS1  
PHKG1A  
PILRB2  
TIGD1  
TMEFF1A  
UQCC3  
CRYGA  
GUSBP2  
HAGLR  
MIR6948  
MIR883A  
PCDH2AA15  
RIMS2A  
C5ORF22  
CBWD5  
DEFB10  
FREM2B  
NXF7  
PRL8A2  
RPSAP58  
ATAD5B  
CCDC56  
FMO9  
KCNE5  
MIR145A  
NR0B2A  
SFRP1A  
SSU2  
VOM1R46  
EBF3A  
FTR51  
MIR548V  
OLFR1156  
PDZRN3A  
PIMR188  
SNORD103C  
SNORD14C  
SP8A  
TMPRSS11F  
TMTC2B  
ANK1B  
ANKRD45  
ARID1AB  
CSTDC4  
ESYT2A  
FAM200A  
FAM40A  
GNAO1A  
HNRNPL2  
MCF2LA  
MIRG  
PCDH1G22  
PONZR3  
RAB11BA

SENP3A  
FAM166A  
NIBAN3  
RCVRN2  
SLC22A25  
SSBP3-AS1  
UTP14C  
ZNF420  
ADAM34  
ATP5MEA  
CDCA7B  
COLCA1  
LY49S6  
MIR302C  
TCP10C  
TUSC2B  
ZNF207B  
CCL27A  
CYP2C24  
CYP-35C1  
SGCZ  
SNORD114-23  
SNORD114-26  
SNORD37  
ARFIP2A  
CPT1  
FTLP3  
GIGYF1B  
GPR137B-PS  
H1M  
MIR33B  
OLR658  
PENK-RS  
SVS4  
T2  
TBH  
UGT1B7  
ZFP473  
ADMP  
ALOX5B.3  
FBN3  
LINC01278  
PTRHD1  
TEX22  
ZNF510  
ANKRD28B  
APLNRA  
ARHGAP27L  
CXCR3.1  
DIP2CB  
ELOAL  
FAM227B  
FAM90A1  
KRT96  
LINC00337  
MORC3A  
NPTNA  
PRICKLE1B

SEMA4BB  
SLC16A1B  
SNX1A  
THRAP3B  
TP53I11B  
TUSC2A  
VGLL4L  
ZNF106B  
CACNG2B  
FAM117BB  
FXVD6L  
GUCY2G  
KCNMA1A  
MFSD4B5  
RPS4L  
SMTNB  
SYNGR1A  
ZFP947  
AP2M1B  
ERVK-6  
GABPB1L  
ITM2CA  
KLK14  
OLR1579  
VMN1R212  
VOM2R16  
DUX4L1  
MIR525  
OR4C15  
SAMD1  
TRIM12C  
ZNF26  
EIF4A1A  
ERICH2  
QRFPR  
RGD1561636  
ZNF346  
CBY2  
KIAA1430  
PRLHR  
ABCC6B.2  
ADAMTSL4-AS1  
GP96  
HYMAI  
MAP2K3OS  
MIR3094  
MIR682  
NME2P1  
OLR1453  
OLR292  
OLR515  
OLR633  
OLR77  
OLR956  
PARTICL  
PRLRA  
PTPRJA  
SULT2ST1

ZNF175  
ZNF6  
ATP5IF1A  
BICC1A  
FGF8A  
HIBADHA  
HOXAAS3  
IGKV3-12  
KRTAP31-2  
NLRP5-PS  
PFKFB2B  
PRAMEF22  
RPS6KA3A  
SLC12A7B  
SNHG14  
SPON2B  
STAMBPA  
VENT  
WASA  
WBSCR25  
CNK  
DLEU1  
LGALS9L1  
RGD1560523  
SAGB  
SLC35F6  
VMN1R192  
XAGE1A  
C19ORF54  
CCDC169  
COL-138  
DPY-2  
EGR2A  
KCNN1B  
LILRC2  
OLFR1412  
PAG  
ROL-6  
SCGB1B27  
ZFP109  
ZNF419  
ZNF586  
ARHGEF7B  
CYP2D34  
LYZL6  
MCART1  
MRGPRX3  
OGDHA  
OLMALINC  
PRB1  
SLC8A2B  
SULT2A5  
TRIM52  
ZDHHC20B  
ZNF525  
CAGE1  
IGHV1-64  
KRTAP4-16

NKRFL  
OLFR613  
OR13F1  
OR14A16  
OR52B4  
PATE1  
PRORS1P  
RGD1307929  
SPATA4  
CHST12A  
DAB1B  
DNM1B  
OLR131  
OPN1LW1  
PACSIN1A  
PCDH2AB2  
SPEER3  
TMEM136  
ZFP469  
ZNF257  
ADGRE4P  
BFSP2-AS1  
CLEC-74  
KCNJ12B  
KDM2AB  
MYO1CB  
NDRG3B  
OXCT2A  
PRKACAA  
RFX1A  
ZFH2OS  
ZNF285  
ZNF814  
C1ORF122  
COL-129  
COL-62  
COL-63  
CYP-13A12  
F55H12.2  
HNRPKL  
MSP-32  
OLFR73  
T25B9.4  
VSIG8A  
ZNF816  
ZP3.2  
BAI3  
C8ORF48  
GTPBP1L  
HBAA2  
HSP90AB5P  
LBFABP  
MIR551B  
NXPE1  
PFKP  
PTEN  
RGD1309808  
RMST

ZNF570  
ZNF862  
BAT1  
GAS1RR  
GIT2A  
MIR376A  
RDH16F2  
SCAMP2L  
TEPSIN  
TMEM151B  
VTG4  
BEST3  
CHMP2BB  
MIR103A1  
MIR631  
NLGN4X  
OLFR1155  
PCDHA8  
VMN1R205  
ZCWPW2  
ZNF540  
ANO5B  
DNAJC11A  
DNM1P35  
FRRS1B  
LPAR6A  
MEF2CB  
NPFFR1L3  
OOG1  
PHLDB2B  
PLEKHA7A  
RGS3B  
SPR-5  
ST6GAL2A  
BEX5  
OLFR1044  
OLFR284  
OLFR347  
OLFR574  
OLFR736  
SETA  
SPRING1  
ATP5MD  
C20ORF85  
GID4  
IMPDH1A  
OLFR323  
PSG18  
TCP1-PS1  
CDRT15  
IRX5A  
MTL-2  
OR2T35  
OR4C3  
OR56A1  
OR5C1  
OR5M10  
OR5M11

OR7E5P  
PLCD4B  
PRSS45P  
PSG7  
RGPD4  
SNORA78  
EOLA2  
HSP-70  
IGHV1-62-1  
MIR711  
MUP14  
OLFR1093  
PSG27  
RGD1561517  
SNORA44  
KLK1B21  
KLKP1  
OLFR1440  
OLFR172  
OLFR822  
PTPRFA  
RGD1562690  
RITA1  
RPL10L  
ZNF579  
ABCD3B  
ANOS1A  
ATP6AP1B  
BRPF3  
CAMSAP2A  
CDC42EP1A  
CNSTB  
CYLDB  
DNASE1L4.2  
EFCAB12  
EFNA1B  
FAM26F  
FLOT1A  
FYNB  
GRK5L  
LDHAL6B  
LINC01164  
MIR133A1HG  
MOV10A  
MSRB1B  
MYO7AB  
NPR1B  
OAZ1A  
OR51B5  
OR7G3  
PLCD3B  
PRKG1B  
PRNPRS3  
RAD23AB  
RAF1B  
RBM24A  
SCARNA21  
SH3GLB2A

SLC5A6A  
ST3GAL3A  
SYNE2B  
TBC1D12A  
TBCELB  
TYMS-PS  
VCAM1B  
WBSCR27  
C04G2.3  
C17H12.8  
E03H4.8  
F09C8.1  
FABP4A  
GZMG  
IRG-1  
KLRA10  
MIR507  
MIR518B  
MIR519B  
OLFR958  
SLC35G5  
STOML3  
TFAMP1  
TTBK-2  
W03D8.9  
W03F9.4  
WFDC5  
HIST1H4L  
ITGB1B  
KLK1B11  
MIR4530  
MLLT4  
NPHP3-ACAD11  
NTN5  
PIRA4  
RGD1307595  
RREB1B  
SEPTIN1  
SRP14-AS1  
ACKR4B  
ATAD1B  
C32H11.3  
CBLN9  
CHI3L3  
CLEC-143  
COX5B2  
CYP2AD6  
CYP2X8  
FNDC3BA  
GBE1B  
GPD1C  
IL15L  
KRT18A.2  
LEG1.1  
MLLT1B  
MTX1B  
NSPA-5  
OATX

OAZ2A  
PFKLB  
PPP2R1BB  
PRKACAB  
SEC14L7  
SEC61A1L  
15-Sep  
SEPT4B  
SLC6A22.1  
VMN1R27  
XPO1A  
ATP6V0CB  
BSPH1  
C2ORF78  
C5ORF52  
DDI1  
EIF4A2P4  
EVPLB  
FOXC1B  
FZD9B  
HNRNPA1P7  
KMT5AB  
MIR1205  
MIR9-3  
MVL  
NOG1  
OLFR1008  
OLFR1349  
RT1-M4  
VENTX  
VENTXP7  
VMN2R4  
XLR3C  
C15ORF32  
C17ORF102  
CDY1  
CXADRP1  
DEFB136  
DMBT1L1  
DOC2G  
ECEL1P2  
ERVK3-1  
H3-5  
ITIH6  
KRTAP10-1  
KRTAP10-12  
KRTAP13-3  
KRTAP5-10  
KRTAP5-11  
MAS1L  
MIR378H  
MIR6085  
OR4F15  
OR51A7  
OR52I2  
OR52N1  
OR6C4  
OR6N1

SELENOT  
SNORA17B  
SNORD9  
TAAR8  
TARS3  
TBC1D28  
ULK4P3  
ZFP366  
ZNF649  
ANKFN1  
C12ORF60  
EFL1P1  
FZD3A  
GTF2H2C\_2  
HMG1  
ODF3L2  
OLFR160  
OLR744  
RBPMS-AS1  
ZFAT-AS1  
ZRANB2-AS2  
CNBD2  
GRAMD2  
KCTD12.1  
MIR541  
NK4  
ZFP426  
ZNF460  
C14ORF178  
C8ORF87  
CD300LD3  
DYNLL2A  
FAM177A2  
GOLGA6L1  
HIST1H3E  
HIST1H4A  
MIR1587  
MIR4507  
MIR709  
OLFR242  
OLFR54  
OLFR775  
RGD1562080  
VLDLR-AS1  
XKR3  
ZFP850  
CYP2B31  
EIF3LP3  
MIR654  
OLR1093  
OLR1200  
OLR1416  
OLR1451  
OLR1668  
OLR241  
OLR295  
OLR424  
OLR653

OLR763  
RPL5P29  
RPSAP28  
RPSAP3  
RPSAP31  
SNHG9  
TMEM212  
ZNF676  
BUC  
C12ORF45  
CITED4B  
EWSR1A  
GSTE2  
LINC00663  
LMNL3  
NCF1B  
OPN1MW  
TBX16  
DEFA23  
DEFB127  
EXO70  
KIF13BA  
LY49I2  
NCANB  
OR5D14  
SSXB1  
WDR20B  
ARHGEF3L  
BTBD6A  
CD248A  
CDK5R2A  
COL7A1L  
CRYGM2D20  
CYP2C1  
DLB  
KHDC1A  
KIR2DS2  
LY6F  
MIR518E  
MIR519C  
MTMR1B  
NAIF1  
PLPPR3B  
SV2BB  
TKTA  
CCL4L2  
MAP2K4P1  
METTL21EP  
PTENP1  
SLC43A2B  
SNORA74B  
SNORD116-5  
SNORD116-7  
SORD2P  
STOX2A  
UXT-AS1  
ZNF500  
ZNF736

ANKRD34B  
CEP-1  
CTPS1B  
FAM227A  
KLRA5  
MIR523  
SETD9  
TMC1  
TSNAXIP1  
APOA-IV3  
LINC01000  
MIRLET7F2  
SKINT9  
VMN1R46  
ZFY1  
ARSF  
C3ORF85  
CYB561A3B  
CYSLTR1  
EMILIN1B  
FLG-AS1  
FMO6P  
GSTA7P  
LIMK1A  
LINC01474  
LINC01787  
LRP2A  
MIR1197  
MIR124-1  
MIR3150BHG  
MIR546  
OR10W1  
PONZR5  
PRR23A  
PTGS2A  
SEMA3BL  
SNORA53  
SNORD116-25  
TCERG1A  
TEX46  
DIPA  
LCN1  
MIR376B  
PCDHB12  
ST1A8  
ARMC1L  
CBX3A  
GRB2B  
OLR386  
SNORD49B  
SRSF6A  
ZFP592  
ZNF784  
ACNATP  
ALG1L  
ANKRD26P3  
ANXA11B  
AQP7P4

BADA  
BBOX1-AS1  
C1ORF141  
C5ORF60  
C8ORF37-AS1  
CD81-AS1  
CLLU1-AS1  
DEFB106B  
DEFB116  
DEFB121  
DEFB122  
DEFB126  
DNMBP-AS1  
DRD5P2  
FAM167A-AS1  
FAM66B  
FAM71C  
GLDCP1  
GNAV1  
HBM  
HCG9  
IRAG1-AS1  
KIAA1210  
KRTAP20-1  
LEF1-AS1  
LINC00029  
LINC00244  
LINC00301  
LINC00314  
LINC00620  
LINC01098  
LINC01122  
LINC01563  
LINC02026  
LINC02443  
LMNB1-DT  
MACF1A  
MAPT-AS1  
MIR1185-2  
MIR3078  
MIR4326  
MIR4475  
MIR9-2  
MUC17  
OR10Q1  
OR11H12  
OR14C36  
OR1S2  
OR2J3  
OR2L2  
OR4K5  
OR52N5  
OR56A5  
OR5B17  
OR5D13  
OR6C1  
OR6C6  
OR6C75

OR8D1  
OR8G2P  
PSKH2  
RABGAP1L-DT  
RBM15-AS1  
RNASE8  
RNF216-IT1  
SAA3P  
SDHAP3  
SH3GL1B  
SIGLEC11  
SILC1  
SNORD114-20  
SNORD114-21  
SNORD115-10  
SNORD115-35  
SNORD115-38  
SNORD115-8  
SNORD115-9  
SOX1-OT  
SVIL2P  
TAS2R8  
TBL1XR1A  
TESC-AS1  
TTY20  
TUBBP6  
WFDC6  
XAGE5  
ZDHHC8P1  
ZNF223  
ZNF236-DT  
ZNF727  
ARL4AA  
CHI3L2  
KRTDAP  
TLCD3BA  
RAD23AA  
VN1R3  
DEAR  
GABRR3  
MIR26A-2  
MIR344B  
MIR3569  
MIR7224  
NOMO2  
ZNF581  
1-SF  
AKR1B10P1  
FIZ1  
HCG4B  
L1MD-TF30  
MAGI1B  
MRGPRA6  
OLFR1182  
OLFR1198  
OLFR1424  
OLFR480  
OLFR873

OR10R2  
PABPC2  
TESPA1  
TUSC4  
ZNF705G  
F3A  
FAM166C  
KAZNB  
KCNJ3B  
MAGIXA  
MYADML2  
NR2F1-AS1  
OLFR959  
RBFOX3A  
SERT1  
SMIM26  
TMEM181A  
VOM1R2  
ZNF675  
LMNTD1  
MIR3916  
NOS  
NYAP1  
OLFR1202  
RL  
SMIM11  
ZNF548  
BSND  
GOLGA7B  
KIF20BB  
MON1BB  
NXNL1  
PCDH1B  
PLEKHA1A  
PTK6A  
SLC25A38B  
ZIC2B  
BORCS6  
CHMP4A  
STEAP1B  
TMEM255B  
ZFP747  
AOX4  
CEACAM16  
KCNC3B  
MIR194  
MIR466H  
MIR669F  
MIR714  
PARP12B  
RAB3AA  
TMX2B  
TTN.1  
VOM1R38  
H3-2  
GPR156  
IGFBP2A  
LFT1

MIR468  
MIR871  
NKX2-3  
TAS2R14  
TBC1D21  
TDRD1  
APLNRB  
CCDC104  
CDKN1CA  
CRABP2B  
GRAMD4B  
NAP1L4B  
NEURL1AB  
OAS1E  
OLFR851  
RABGAP1L2  
KIFAP3A  
OSTN  
RSPH4A  
2-Sep  
BUB1BA  
ITPR1B  
OLFR1121  
OLFR661  
PLECB  
PPP2R5CB  
PVRIG  
SGIP1A  
SH3PXD2AA  
TAS2R135  
TNA  
VMN1R227  
YY1AP1  
ABCA4A  
APOBEC2A  
IGF2-AS  
MPP6A  
PLCD1A  
SPOUT1  
TCF3A  
ZFP820  
C17ORF100  
C1ORF189  
MIR21A  
OLFR629  
OR13C4  
OR1N2  
OR1Q1  
PAGR1A  
VMN2R111  
ATOH1A  
CALM3B  
FKBP1AA  
NAB1B  
SNORA5C  
ANKRD18A  
GRIN1A  
MIR3968

MIR632  
MTRNR2L1  
MYH15  
SH3BP5B  
ZNF140  
APOA-I-1  
OLR1061  
OLR1307  
OLR1316  
OLR1418  
OLR1589  
OLR1691  
OLR416  
OLR661  
OLR774  
RGD1562885  
TPH1A  
ATF7B  
CHCHD6A  
EPHA5-AS1  
FAT3A  
FBXO30A  
GPR75  
GRM6B  
OBSCNB  
OLFR1061  
OLFR895  
OLFR904  
OLFR935  
OLR35  
PRKCHA  
RGD1563606  
TNNT2C  
GLB1L3  
MAGEA2B  
OVOS2  
PRSS42P  
RGD1359508  
COL-49  
KLK5  
LRRC66  
MIR431  
SNORA30  
SPATA6L  
TAS2R20  
TMEM221  
ZNF300  
ANKRD10A  
ANXA1A  
CTDSPL2A  
FBXW14  
FUT9D  
FZD8B  
HHATLA  
HOXA1A  
MIR190A  
MTRNR2L8  
NACP60E

OR6Y1  
PTPRZ1B  
RAS  
REG1A  
SEPT5-GP1BB  
TPTE2P1  
CLCA3A1  
CRESTIN  
HRNR  
MIR584  
MMP15A  
NLRP4F  
NOMO3  
OLR1376  
OLR1434  
SLMAPA  
ABU-11  
ABU-7  
ASS1P13  
ATP5MC1P5  
CAP1P1  
CRATB  
CSNK2A3  
CST  
CXORF51A  
FRS2B  
GHR1  
GIF  
MARK2A  
MIR218  
OLFR508  
OLFR820  
PCDH2AB12  
PHBP11  
RGD1561413  
RPL17P50  
RPL21P62  
RPS27AP17  
SEC11B  
SERTM1  
SLC25A5P7  
SOUL4  
ULE-3  
ZDHHC16B  
DARC  
FAM229B  
LHX8A  
XLR4C  
ARPP19A  
C06A8.6  
CLDN22  
COL-140  
COL-38  
CYLC2  
F58E6.5  
F58G1.3  
GCSAM  
GLN-2

MIR548B  
MSP-31  
MSP-79  
OLR1226  
SLC2A1A  
SNORA21  
SPE-11  
SSQ-4  
CCDC189  
DDX39AB  
DSTNP2  
FLOT2A  
GST-8  
KIR2DS4  
PPP1R9BA  
PRL7C1  
RGD1562625  
RGD1563818  
RGD1566227  
SERPINB9D  
TEX264A  
UBE2D1A  
ACT88F  
ARPP19B  
CPT1AA  
DAP1B  
DAZ4  
DEFB45  
FFAR1  
IL25  
PRPH2  
RABL6A  
RPTOROS  
SMIM2  
SNORD101  
SP3OS  
TEKT3  
TESCB  
CERS2A  
DNAJA  
LILR4B  
OLFR862  
PRY  
SET-30  
SNORD20  
SQSTM  
TNIP3  
ADCY2B  
ATP6V0A1A  
C19ORF67  
CACNA1SA  
CCDC180  
CFL1L  
CHCHD4A  
CTL-1  
DEFB49  
DENND2DB  
GSNB

MAPRE1A  
MOTO  
OLR1159  
OLR143  
OLR631  
OLR717  
PAX7B  
PPM1AA  
PRPH2LB  
RNF34A  
SLC1A3B  
TIAM1A  
USP51  
FAM223A  
FHL1B  
KRTAP16-1  
OLFR292  
OLFR402  
OLFR943  
PSG17  
VMN1R58  
VMN1R-PS103  
CUEDC1A  
KCNIP1B  
PVALB6  
SEPT8B  
SHCBP1L  
SYPB  
ZP2L1  
C12ORF50  
CYP2P6  
HOMER1B  
KRTAP4-9  
LNX2A  
OR1D4  
OR4S2  
RGD1564480  
SHISA8  
SHLD1  
SLC22A20  
TBC1D29P  
TRBV14  
ZFP942  
AMY2  
CISHB  
CLPXA  
ERVW-1  
KISS1RA  
MIR568  
OLFR1420  
PIN4P1  
POMZP3  
PTPRFB  
RGD1562844  
SNORA34  
TNFSF13OS  
U90926  
BIVM-ERCC5

DUSP23B  
GLIS3-AS1  
INO80B-WBP1  
KRTAP13  
MIR365A  
PPP2R3B  
RPL23P8  
SNORA49  
SPATA12  
SSH2B  
URGCP-MRPS24  
ADGRF6  
ANXA2-PS1  
ARGLU1A  
ARHGAP35B  
ARRB2B  
C16ORF78  
CLPXB  
CYP46A1.3  
DACHD  
DCLK2A  
DENND3A  
ERRFI1A  
FAM24B  
FAM49AL  
FUCA1.1  
ITGA3B  
JAG2B  
KRTAP13-1  
MARK3B  
MGAT4D  
MIR544  
MLSL  
MYOM2A  
NAPAB  
NHSL1B  
NRCAMA  
OR10A2  
PLK2A  
PMP22A  
PRKAB1B  
RAPH1A  
ROCK2A  
SEMA3FA  
SLC4A4A  
SMYD1B  
SNORA80E  
SPEGA  
STAG1A  
TMPPE  
XKR8.3  
YRK  
CATP-3  
CATP-4  
CLEC-123  
F17E9.5  
FHL2A  
KMT2BB

LBX2-AS1  
MIR492  
MIR570  
MKXA  
MSD-2  
OLFR1055  
SCGB2B27  
SERPINB1L1  
SNORD12  
SSS-1  
T13F2.9  
Y43F8A.2  
Y57G11A.2  
Y69E1A.1  
Y69E1A.2  
BCL2A  
C17H12.6  
C32H11.4  
F56D5.3  
GST-13  
GTF2IP1  
KLK1C6  
KRTAP19-2  
MIR4488  
MIR4787  
MYO6A  
SMIM13  
UGT5B2  
W06H8.2  
ZFP12  
ARPC5A  
ATP6V0A2B  
CPEB4A  
CRYBA1A  
CTHL  
CYP4F8  
DEFA-RS10  
DESI1B  
GOLT1BB  
KRTAP9-1  
LEG1.2  
MARCKSL1-PS4  
MIR101-2  
MIR467C  
MMP23BA  
MTMR7A  
OLFR157  
OLFR67  
SEMA4GB  
UGT5B3  
ANKHA  
C10ORF53  
C9ORF106  
CCT8L2  
CRATA  
CYCB  
FAM102AB  
FAM180B

FAM205BP  
FSTA  
GJA5A  
GSTA6  
H1-7  
IQCF2  
LINC00852  
MBD3L1  
MDS2  
MIR294  
NAT15  
NDEL1A  
OLFR1168  
OLFR225  
OLFR314  
OLFR531  
OLFR536  
OR6P1  
SERPINA10A  
SYNGR3A  
TNN  
UGT5G1  
ZFP872  
C10ORF120  
CDRT15P3  
CPS1-IT1  
GGNBP1  
HTR3E  
KHDC3L  
KRTAP10-11  
KRTAP10-2  
KRTAP13-4  
LINC00523  
LINC01565  
LINC01600  
LLCFC1  
MIR124-3  
MIR1303  
MIR340  
MIRLET7C1  
NKAPD1  
OR10K1  
OR13J1  
OR2T3  
OR2Z1  
OR4D11  
REXO1L2P  
RFPL4B  
RTP5  
SCARNA5  
SNORD27  
SNORD32B  
STK35L  
TBC1D26  
TDRG1  
CCDC41  
FMO9P  
LINC00602

MIR338  
SNORA22  
SNORD26  
UNGA  
ZNF107  
CCDC60  
GSTE5  
KRTAP26-1  
LRGUK  
MIR1933  
MIR3099  
MIR3960  
MIR7654  
PDXKA  
RAD51AP2  
SIX4B  
STRM  
ZIM3  
ANKRD30BP2  
APOEA  
ARMH1  
DEFB36  
DLX6-AS1  
FMR1-AS1  
HECTD2OS  
HIST1H2BK  
MIR378I  
MIR605  
OLFR1378  
OLFR938  
PPP1R14AA  
RGD1559972  
RPS18L1  
TDGF1P3  
C16ORF87  
DOCK9B  
FRMPD3  
GCGRA  
KB15  
KCNRG  
NEWGENE\_1310139  
OLFR1051  
OLFR849  
RAB1BA  
RPS2-PS10  
SLC39A12  
SOCS3B  
CRYGM2D2  
MYH9B  
PPM1LA  
RNU6  
SOD  
EVLA  
GPR34  
GSTS1  
IQCF4  
KHDRBS1A  
KRT97

LRATB.1  
MBD3B  
MIR759  
NR2F1A  
OR8G1  
OR9K2  
RASSF7B  
TMCO2  
TNIKA  
TRIP10A  
BRICD5  
FAM66D  
FPGT-TNNI3K  
HAR1A  
LINC00691  
MIR502  
MIR508  
MIR519E  
MIR618  
OLFR635  
OLR1069  
PANE1  
TWIST1B  
ZFP266  
CT62  
CYP4F29P  
ELK2AP  
FTX  
GABBR1B  
KAAG1  
LINC01011  
MIPA  
MIR181A1  
MIR320  
MIR637  
MTL-1  
OLFR1148  
OLFR796  
PRDX6-PS2  
SIGLEC12  
SNORA40  
TAS2R125  
UQCRBP1  
ZNF43  
C10G11.8  
CAMTA1A  
GADD45GA  
GTF3AB  
KPNB3  
LINC00836  
MYH9A  
QDPRB.2  
SNORD71  
UGT1B4  
BPIFB6  
C16ORF82  
CLDNF  
DLEU7

GPR52  
GPSM2L  
LINC01781  
LINC02532  
MIR3613  
MIR887  
NANOS2  
NAP1L4A  
NLGN4XB  
PINCR  
PLGLA  
RAB11FIP4A  
RGD1311517  
RGD1562890  
RPLP0P2  
S100U  
SELENOW1  
SEMA4BA  
SLIT1A  
SNAR-I  
SNORD116-29  
SOD3A  
SPG1  
TAS2R39  
TIPARP-AS1  
ZFP661  
ZFP78  
ZNF705A  
ZNF732  
ALCAMB  
ATP6V1AA  
C19ORF73  
EVPLA  
FTR83  
GABARAPB  
HER1  
KRT8P12  
LIPT2  
OSBPL2B  
PRC1B  
RGD1560350  
SLC25A36B  
SLC7A8A  
TMEM243A  
TMSB1  
TPRA  
ZNF702P  
ANO9  
BA1L  
LRRC36  
SLFN12  
CMTM2  
GSTE6  
MIR1-1HG-AS1  
MORF4  
OR4F6  
VCX3B  
ZNF724

C12ORF42  
CASC9  
CLLU1  
COL18A1-AS2  
DAOA-AS1  
DEFA1B  
FAM58A  
FAM90A10P  
GNA14-AS1  
LINC00229  
LINC00323  
LINC01102  
LINC01456  
LINC01599  
LINC01954  
LINC02133  
LINC02227  
LINC02241  
LL22NC03-63E9.3  
MACROD2  
MIR352  
MIR3619  
MTCO3P12  
OACYLP  
OR10A3  
OR10A6  
OR10AD1  
OR10X1  
OR1S1  
OR2C3  
OR4A5  
OR4C12  
OR4C45  
OR4C6  
OR4M1  
OR4M2  
OR4P4  
OR4S1  
OR52M1  
OR56B1  
OR5K1  
RXRAB  
SLC9C1  
SNX29P1  
STX12L  
TAS2R42  
TAS2R9  
TRIM49  
TTY15  
TTY8  
UMODL1-AS1  
UNQ6494  
ZNF564  
CFAP46  
CYP-34A9  
FTCDNL1  
LNCRNA:HSRROMEGA  
OLR1646

OLR530  
TRGV2  
LRRC30  
SULT  
CCN2B  
CD99P1  
COX5AB  
MAFGA  
OLFR1451  
RNU5D-1  
SLC7A10A  
SVA  
DEFA20  
ESRRGB  
FAM109A  
HNRNPABB  
IFNA6  
IGKV4-86  
JMJD2C  
LINC00917  
NOTS  
NUDC-PS1  
OLFR1444  
OLFR378  
OLFR720  
OLR1424  
OLR232  
OLR397  
OLR903  
PRAMEF20  
RN7SL2  
SEMG2  
SNORD3B1  
SNORD77  
TLM  
VMN1R229  
VMN2R81  
ZNF208  
CFAP94  
CYP2D37-PS  
GID8A  
PPP1R3DA  
PRKCDA  
PRPMP5  
RGD1304770  
RGD1565355  
SNORD41  
SSRP1A  
ST3GAL8  
TMEM110L  
CCL34B.1  
MIR1949  
PALM3  
PCOLCE2B  
SEC6  
CNC  
GSTT1L  
HK2P1

MUP7  
NBPF4  
OLR1381  
OLR1481  
OLR1701  
OLR826  
PIT54  
PRL7B1  
RPSAP12  
SHHB  
SSTY1  
YBX1P2  
ZBTB11-AS1  
ZBTB3  
ZSCAN5A  
CMTM2B  
DNMT3BB.2  
OR10A4  
OR14J1  
PIAS4B  
SNORD1C  
TBXTA  
ZNF215  
ZNF717  
ANXA2P1  
ABU-6  
ABU-8  
CDHR1A  
CLEC2L  
FAIMB  
GOLGA2P2Y  
GPM6AB  
HAPLN1B  
KRT18P65  
LASS2  
LRATB.2  
MAP7D2B  
MS4A6BL  
NPM1P8  
OLFR1537  
OLR1058  
OLR1064  
OLR1364  
PQN-54  
RNF128A  
RPL15P11  
RPL26P11  
RPS2P18  
RPS2P28  
RPS3P6  
RPSAP47  
SCNN1D  
SPDYE21  
SYN2B  
SYPL1  
TMEM173  
XKR7  
YWHAQA

APPB  
CEP295NL  
COL-120  
COL-8  
DMRTC1C2  
F52H3.6  
F58A6.9  
FAM149B  
GSP-3  
LYS-4  
MIR181B-1  
MIR3095  
PDZPH1  
PRR18  
RPL5B  
SSP-16  
SSQ-1  
C14ORF156  
CLDN15A  
DARMIN.L  
INSM1B  
PLXNB2A.1  
PRAMEF5  
RPL13AP5  
SCARNA20  
TRDV3  
ABI1A  
BGLAP2  
C9ORF64  
CSNK1G2-AS1  
CTAG2  
DHS-8  
GCS-1  
GST-20  
NUTM2D  
RANGAP1B  
SNORA67  
SYT6A  
UCMAB  
ACY3.1  
C9ORF153  
CCDC173  
EIF4BP1  
GAS8-AS1  
HPXB  
IGHV1-77  
KRTAP14  
OLR1351  
PCDH10B  
PRX3  
SAO  
SLY  
SNORD1A  
CTDSPLB  
EIF4BB  
EIF4E2RS1  
EXT1A  
FRYB

MYH11A  
OGT.1  
OLFR1348  
OLFR798  
SLC25A1A  
SPETEX-2G  
STMN1B  
CWH43  
DRB1  
OR115-14  
PARK  
PES  
PHF11A  
PTK2AA  
SELENOU1B  
SNORA3  
TPM4B  
ZNF843  
CASQ1B  
CT45A3  
DEFB24  
OLFR435  
PCDH1GB9  
SEMA6E  
VMN1R28  
ZFP352  
ZFP940  
CCDC144CP  
CLCA4L  
FAM181A-AS1  
HOXB2A  
HOXB8B  
LINC00923  
MAPTB  
MARCKSL1A  
NEFMB  
SERPINB9E  
SNORD3B-1  
SUGT1P1  
TTC41  
TUSC7  
ARL6IP5A  
FAM215A  
KRT6  
PRSS56  
TEX47  
ZNF227  
CYP2C79  
DPYSL5A  
FAM24A  
FBXW11B  
IGKV14-111  
MAGEA5  
MIR6540  
MIR6933  
MIR7025  
MIR8106  
OLFR441

RFPL4  
RIN1A  
SNORD42B  
TAS2R144  
VOM2R37  
ZFP943  
ANXA2P2  
C4ORF47  
CALM2A  
F8A3  
FAM9C  
LINC00869  
MIR323B  
MKNK2B  
PCMT  
SMG1P7  
SNORA16A  
SNORD10  
SNORD97  
AGR1  
ANKIB1A  
AQP9B  
ARPC4L  
CTSS2.2  
DACHA  
DHRS11B.1  
DOPEY2  
IFI208  
MIR30C-1  
MMP30  
MORG1  
OR51B2  
OR7E156P  
PANK1A  
RHOCB  
RORCA  
SSX4B  
STIM1B  
ARGK-1  
C2ORF50  
CIPCB  
CRYGM2D6  
LDB2A  
LYPLA2P1  
MIR4497  
MIR4508  
MIR595  
MIR653  
RNF223  
SPAAR  
ST5  
SYNE2A  
T16A9.5  
T27E7.1  
TGFB1A  
TVP23A  
Y1A5A.1  
ZSCAN9

ATP5MF-PTCD1  
FAM154A  
GNAI2A  
MIR4521  
MYCLA  
OBOX5  
PRKCDB  
RGD1564899  
RHOX2  
RHOXF2  
SOX11B  
ZFP174  
ZNF101  
AHSG2  
ASIC1A  
BAIAP2A  
CBSA  
CYP2C80  
FSTL1A  
GDPD5B  
GNAI2B  
HMGCLL1  
LILRB3L  
LRP1AB  
MAPRE1B  
MIR490  
MYL9B  
OLFR432  
PBXIP1A  
RGD1561232  
RLN3A  
SLC22A6L  
SLC43A1B  
SNORD51  
SULT1ST4  
APOL5  
ARF4A  
C10ORF55  
C1ORF194  
C20ORF197  
C5ORF47  
CDCA7A  
CRYBA1B  
CRYBA1L1  
DSCR10  
DSCR8  
FAM170A  
GFY  
H2AC24  
KCNK17  
KCNQ1DN  
KRTAP10-4  
MHC1ZAA  
MRGPRX4  
NUCB2A  
OLFR1388  
OR10H2  
OR2A2

OR51F2  
OR51Q1  
OR8H1  
OTOL1  
PCDH10A  
POM121L12  
PYY2  
RPL29P2  
SNORD115-11  
TAX1BP1B  
XLR  
ZNF835  
DNAJC25-GNG10  
HAS2-AS1  
LINC00511  
MIR4492  
MIRLET7F-2  
TSC1A  
ZFP879  
ANO8  
CD1B  
CTSS2.1  
CYP4F40  
DEFB13  
ENKD1  
IGLJ3  
METTL11B  
RBM4.3  
SPANXN1  
ZNF529  
C1GALT1B  
C24H7ORF50  
C87436  
CRABP1B  
CTL-2  
EP300B  
HPCL2  
JHEH2  
KHDRBS1B  
KIAA1524  
KLF7B  
MSX2B  
MYBPHB  
NFIL3-5  
NR2F5  
OLFR434  
OLFR68  
OR52A1  
RARAB  
RGD1308706  
RT1-T24-3  
SERPINA3B  
SRSF5A  
ZFP869  
AQP7P3  
ARAP1-AS2  
ATXN8OS  
FAR2P1

LINC01060  
MIR378E  
MIR4485  
MIR7704  
MS4A17A.3  
NPIPB6  
PCOLCE-AS1  
SLC6A1B  
CADM1A  
CCT8L1  
CRIP  
KIF20BA  
OLFR1393  
OLFR1480  
OLFR676  
OLFR974  
TRAF4A  
VMN1R4  
YY1P2  
ZNF256  
ANG1  
COL27A1A  
DYNAP  
FAM225B  
HBBE1.1  
ILDR1A  
LIPEA  
MSI2A  
MYBPHL  
PAFAH1B1A  
PCDH2AC  
RGRA  
S100V2  
SAMSN1B  
SLC29A4P1  
ZFP938  
CALM3A  
CEACAM21  
CETN4P  
ELA3B  
HTN1  
IGLV3-21  
OLR1353  
PRY2  
RT1-A1  
SNORA50A  
SPON2A  
TMPRSS11G  
USP9  
ZFP667  
BMP2A  
CA15B  
CAPN2L  
DTX2P1-UPK3BP1-PMS2P11  
GUSBP15  
HIST2H2BB  
LINC01002  
LINC01347

MDGA2A  
MIR563  
MIR564  
OLR1070  
OR12D2  
PRKAR2AA  
PRL2C1  
SNORD4B  
SNORD63  
SNORD95  
SYNGR2B  
ANKRD18B  
FBXO47  
KLRA7  
LINC00964  
MANCR  
SAMD7  
SNORD57  
USP17LD  
ZNF205-AS1  
AANAT  
APODA.2  
CHICO  
CLDN15LB  
CRY3A  
FOXQ2  
MANEAL  
MIR208B  
MSX1A  
NR1D2B  
OLR285  
OLR675  
OLR786  
OLR821  
TMPRSS11E  
UGP2B  
ADAM1B  
BGNB  
CALUA  
CALUB  
HMGB2B  
HYAL6  
IGKV1-132  
IGKV1-135  
KRTAP13-2  
LINC00693  
LINC00880  
LINC00955  
LINC02158  
MIR1188  
MIR124-1HG  
MIR2278  
MRPL23-AS1  
NHEG1  
OLFR26  
PCBP1-AS1  
PCXB  
PDI

PSMD4A  
SLC38A5B  
SNAR-G1  
SNORD116-11  
TMEM176L.4  
VN1R1  
ZFP939  
ZFP984  
ACT87E  
FMO6  
GCGA  
MYOZ3A  
OLFR1153  
PRL3D2  
SOX21A  
CGM4  
FTN-1  
OLFR649  
PB1  
SNORD44  
SNORD79  
UGT-1  
CLDN13  
D7ERTD443E  
FAM27E5  
MIR1304  
MUP13  
OR1J4  
OTPA  
RPS8A  
TRIM48  
VEM-1  
WDR20RT  
XAGE3  
AADACP1  
ACTRT1  
ADAM3A  
AGAP11  
ANKRD26P1  
APOC1P1  
C1ORF87  
C2ORF16  
C8ORF86  
CLEC17A  
CYP4Z2P  
DAOA  
DEFB124  
DHRS4L1  
DNAJC27-AS1  
ERV3-1-ZNF117  
FAM157A  
FRG1BP  
GAGE2E  
GSDMCL2  
KIAA2012  
KRT8P41  
KRTAP9-9  
LANCL1-AS1

LHX1-DT  
LINC00161  
LINC00200  
LINC00486  
LINC00578  
LINC00824  
LINC01096  
LINC01104  
LINC01187  
LINC01317  
LINC01411  
LINC01465  
LINC01551  
LINC01772  
LINC02210-CRHR1  
LINC02351  
LORICRIN  
LSP1P4  
MAGEB10  
MAMDC2-AS1  
MS4A18  
MS4A6E  
NKAPP1  
NUDT16L2P  
OR2M3  
OR4A47  
OR51D1  
OR6C74  
OR7A17  
OR8U1  
OR9Q1  
PACRG-AS1  
PDIA3P1  
PLEKHM1P1  
PLUT  
RGD1561916  
RGS21  
RNF217-AS1  
SFTA3  
SNORD115-7  
TCHHL1  
ZBED6  
ZNF136  
ZNF664-RFLNA  
ANKRD36BP2  
ANP32BP1  
AZIN1B  
HSPD1P5  
NOP56P2  
OLFR1030  
PDL1  
RGD1560559  
RPSAP30  
SNRPGP10  
TAAR7A  
ZSCAN16  
CFAP99  
NFYC-AS1

OLFR30  
SNORD53  
SRSF3A  
STX18-AS1  
TCL1B1  
TCL1B3  
TUBA8L2  
ATP2B3A  
CALCRLA  
COL-19  
GSKA-3  
MIR557  
NRXN2A  
OLFR374  
OLFR691  
TGIF2LX  
W02B12.12  
ZFP607A  
ZYG11  
ARHB  
ASAH1B  
GST-14  
GST-16  
NBPF15  
ZFP455  
ADM2A  
C2CD6  
CYP2X9  
SOX4A  
THAP9  
ALPHATUB84D  
CRXOS1  
FAM129A  
MIR625  
RGD1560108  
SNORA1  
SNORD6  
TAF1L  
C19ORF33  
FAM209  
LARS1B  
MDR50  
PPAN-P2RY11  
PRR12B  
SELENOT1A  
SMIM23  
TEAD1B  
CAVIN2B  
IFNG1R  
JRKL  
MAPK14A  
MICOS13  
NRARPB  
OLFR433  
OLFR960  
CRYBA2B  
CRYGM2D13  
MDKA

MIR467F  
MYH16  
RHOXF1  
SERPINB1L4  
SNORD61  
STX3A  
TMEM191C  
FGFRL1A  
MIR881  
OR5AR1  
SLC43A1A  
CLEC2E  
ITPKCB  
OLFR1026  
PDCD4B  
UGT5D1  
ZFP454  
ABHD14A-ACY1  
IRGC1  
METTL10  
OLFR821  
RGD1307461  
SNORA71B  
SPIN2C  
TCEB3  
VMN2R1  
ZFP286  
ZFP605  
ANK3A  
ASCL1B  
ATF5A  
ATP6V0CA  
CYP6A8  
ELOVL1B  
FHL2B  
FSCB  
KLF6A  
KLHL24A  
MIR190  
MIR367  
NOV  
NUTF2L  
OLR1696  
RPRD2B  
RRBP1B  
12-Sep  
TRNAU1APB  
VIT-1  
AFAP1L1B  
CROCC2  
DCAF10  
ECR  
EHD1B  
IRG-5  
MIR466D  
MIR517A  
MSP-38  
PIRA6

SPCH-1  
CCDC54  
CYP3A12  
DOD-17  
GST-39  
GST-6  
HER9  
MIR3178  
MUL-1  
NUCKS1A  
OLFML3B  
OLFR996  
OLR63  
SCAMP1-AS1  
TAAR7E  
TCP10B  
TMEM30AB  
DHRS12  
EEF2L2  
GLS2B  
HNRNPA0A  
HSP-16.41  
LOXL2B  
RXRAA  
SELENOO1  
SLC13A5A  
SLC25A15A  
SLFN11  
SULT1ST5  
SULT3ST2  
TAS2R129  
TSPAN18A  
UGT5B4  
VOX  
ZFP541  
BEND2  
CYTH1A  
IGFL4  
KLF5A  
MIR496  
OAS1D  
OLFR149  
OLFR457  
OLFR92  
PATE2  
PRRX1B  
RDH19  
TNFRSF9A  
ZFP583  
ZFP846  
ARL3L1  
CELSR1A  
CRYGM7  
ELOA3BP  
ELOA3P  
ESRRGA  
LINC00311  
MAFG-DT

MIR3065  
N5  
OLFR638  
PCDHGB3  
PRR35  
RNF113B  
RQCD1  
SIK2B  
STARD4-AS1  
TBC1D3G  
TGM2A  
ARHGEF26-AS1  
C10ORF95-AS1  
OLFR1350  
GRN1  
LINC-PINT  
PAX7A  
PTGES3L1  
SPEER5-PS1  
AB124611  
ACTC1A  
EPHX4  
IGKV6-15  
IQSCHFP  
LINC00702  
MORN5  
OLR1002  
OLR1455  
RPS3A1  
SPTLC2B  
ZNF226  
ADOB  
FZD7A  
HERC2P4  
RNA28SN4  
CCDC135  
CIARTA  
EIF1AXB  
INPP4AB  
LY49I4  
OLFR549  
PVALB9  
RGD1563365  
SLC20A1B  
SLCO1B7  
CR1  
DCAF4L1  
DIEXF  
GK3P  
INE1  
JDP2B  
OR1L8  
PI4KAP2  
PRUNE  
RGD1566359  
SLC34A2A  
TEX28  
BTBD18

CCDC187  
CLDN11A  
DCAF15  
EIF5AL1  
LINC02035  
MIR612  
MPDU1A  
NOXRED1  
RARRES3  
RNF216P1  
SNORD82  
SPDYE3  
TEX33  
ZFP267  
ZFP961  
C19ORF38  
C6ORF99  
CFHL4  
FAM86HP  
HPN-AS1  
LINC01341  
OR52K2  
RBM12B-AS1  
RPS10P7  
SERPINB1C  
SLC30A1A  
SNORD116-4  
SNORD47  
SNORD58C  
SYNE1A  
ATP5F1  
GADD45  
MKL1  
PDE4BA  
SETSIP  
TAS2R46  
ZFP712  
ASMTL-AS1  
CLEC4B2  
EEF1A1P22  
GOLGA8EP  
HSPD1P6  
L1CAMB  
MAP1LC3BP1  
MIR219A-2  
MIR7021  
NPIPBP  
SUMO1P3  
COL5A3B  
CRTAC1A  
DNAAF6  
FTH1P2  
IPF1  
LINC01146  
LNCOG  
MIR1469  
MIR1973  
MIR548H3

OBOX3  
OLFR513  
OR6C65  
OR6T1  
POM121L1P  
ROPN1B  
SIRPD  
TEDC1  
ZNF300P1  
ARL4AB  
ATP5F1EP2  
CD74A  
EPHB3A  
MIR101-1  
NEXN-AS1  
RHOAB  
RT1-CE1  
RYS1B  
TCL1B2  
ABCC6P2  
FCRL4  
GML  
HMGB4  
MIR3591  
MIR651  
NUTM2A  
TPSD1  
TTBK1  
UCHL3-PS1  
UGT-13  
ZFP951  
ANKRD20A9P  
ATAD3B  
BAGE  
BMS1P2  
C1ORF127  
CARD17  
CCDC197  
CIRBP-AS1  
CYCSB  
CYP1B1-AS1  
DDX12P  
ELOVL2-AS1  
EOMESA  
EPCAM-DT  
GLDR  
GNG12-AS1  
HEPN1  
HORMAD2-AS1  
KLHL41B  
KRTAP11-1  
KRTAP5-9  
LINC00189  
LINC00461  
LINC00469  
LINC00592  
LINC01169  
LINC01305

LINC01340  
LRRC52-AS1  
MAGEC3  
MAJIN  
MCPT10  
MEF2C-AS1  
MEG8  
MIR646HG  
MYLPFB  
NLRP11  
OLFR1410  
OLR1750  
OR10J1  
OR1G1  
OR2B6  
OR52D1  
PLGLB1  
POTEH  
PRR30  
SERPINB3B  
SNORD42A  
TAAR6  
TAS2R13  
TAS2R30  
USP2-AS1  
VN1R4  
VOM2R44  
VTRNA1-3  
ZNF337-AS1  
ZNF804B  
ZNF860  
AKR1A1B  
AMOTL2B  
HSP68  
IRBP  
ITGB1B.2  
LIPCA  
SNORA33  
TFR1A  
OLFR830  
PRL8A7  
RGD1565685  
SQLEA  
C2ORF81  
NXF2  
OLFR33  
PPARAA  
CCT8P1  
CTS6  
HBEGFB  
LINC01512  
MAILR  
MBL1P  
OLFR65  
OLFR829  
OR7D2  
PMS2P4  
RPL34-PS1

SRSF1A  
USP26  
CALM2B  
CED-4  
KRTAP1-1  
QDPRA  
RABL2B  
ZFP300  
ZFP719  
ARNTL1A  
CALM1B  
CBSB  
CBX1A  
COL5A2A  
CRYBA2A  
CST12  
HSP40  
KDEL2B  
MIPB  
MIR687  
OLFR1262  
OLFR1395  
OLFR786  
PHACTR4B  
RGD621098  
RT1-M2  
TMEM210  
VCANB  
ATP1B3A  
COL11A1A  
DYNLL2B  
EK1  
EPDL1  
ETV3L  
FHL4  
GALCB  
GRNB  
IVNS1ABPA  
LINC00622  
MGST1.2  
NME2A  
OR10A5  
PI4KAP1  
PRL8A9  
RNASEKA  
RPL13AP20  
RPL13AP6  
SCARNA10  
SERPINB3C  
SNORA9  
UBA6-AS1  
C04G2.9  
CPT1AB  
CYP3C3  
GSTM6L  
HIST1H2AIL1  
ASCL5  
HRASLS

LINC00899  
MIR4324  
SMG1P1  
TRIM34A  
UGT5E1  
WWC2-AS2  
BACE  
HRAT92  
MIR1839  
SCGB2B2  
XRCC6BP1  
CLDN3C  
F9A  
FLNCA  
GMPPAB  
JAM2A  
LINC01605  
MIR764  
NID1A  
PRG4B  
PSMA6A  
SCP2A  
AACSP1  
CTAG1A  
DHRS3A  
GSTD4  
HLA-DQA2  
KIR3DL3  
KRTAP4-3  
LINC00305  
MIR766  
MMP14A  
OLFR1252  
OLFR190  
OR1M1  
OR51G1  
PRDM16-DT  
RFPL1  
RGPD3  
RNF212B  
RNU1-3  
RXRGA  
TNXA-PS1  
ZNF324B  
ZNF454  
ZNF479  
DOCK8-AS1  
FPR-RS6  
IQANK1  
ITGAD  
NBPF9  
PAX8-AS1  
SNORA50C  
SSR4P1  
ABCG3L3  
ARF2B  
CRY4  
DUPD1

KRTAP15-1  
MTNC  
OLFR705  
OLFR914  
RGD1359127  
ZFP341  
ADD3A  
CACNA1AA  
CTSM  
EAR12  
FAM63B  
HOXB1A  
MOXD2  
OLFR1396  
PILRB1  
SFRS1  
SNORD58A  
TDPOZ1  
TH2  
TMEM225  
TMEM238L  
ZFP811  
ADAM3  
CCDC196  
DEFB6  
HSP-3  
LCE1G  
MIR196A  
NARG2  
NRP  
SNORD28  
SNORD30  
YAE1D1  
BCL6AB  
GVINP1  
OLFR695  
POLR3GLA  
D13ERTD608E  
MDKB  
NWD2  
SNORA25  
SPACA9  
TPBPA  
TUBA8L3  
ADAM6  
ARL17B  
CEACAM18  
CREMA  
CYP-35B2  
DEFB29  
GOLGA6L5P  
LINC00888  
MDR65  
OLFR187  
OR4Q3  
RNA18SN4  
SNORA62  
TEX35

BCO1L  
EWSR1B  
KRTAP21-2  
MIR498  
NACA4P  
PCTK2  
PNP5B  
SIGLEC15  
TCL1B  
AATBC  
CXADRL1  
DIAP2  
FOXL2NB  
LINC00313  
LINC01270  
MEN  
OLFR905  
OSBPL3A  
RAB11B-AS1  
RLTPR  
SHFM1  
TMEM254-AS1  
WDR52  
ZFOC1  
ALDH2.2  
C19ORF44  
CED-9  
FAM49A  
IL17R  
KLF12A  
KRTAP5-1  
LAMB4  
LINC00319  
POT1B  
RGD1559896  
SATL1  
ZFP248  
CRISP4  
DAZ2  
LINC00624  
MUC7  
OLFR122  
SNORD83B  
TTC16  
BRP44  
CALB2B  
DPPA5A  
MFSD2AA  
MIR471  
PRL3A1  
RNF113A1  
SLCO6B1  
SVAL1  
TSSK1  
ZNF252  
ATF4A  
CRYGMX  
FDCSP

RGD1310166  
RGD1564804  
YWHAE1  
ANKRD30BL  
AZGP1P1  
C17ORF98  
C1ORF186  
C1RL-AS1  
CCT6P1  
EGFEM1P  
GMDS-DT  
GPR62  
GPR89A  
GRK7  
HCG26  
HLA-F-AS1  
IGF3  
IQCJ  
LINC00114  
LINC01235  
LINC01237  
LINC01559  
MS4A5  
NBPF19  
NLRP8  
NPSR1-AS1  
OLFR771  
OR2L13  
OR2W1  
PCDHB19P  
RACGAP1P1  
RGD1562987  
SEMA6A-AS1  
SLITRK3  
SMPD5  
SNAP25A  
STMP1  
STXBP5-AS1  
TAS2R5  
TBC1D3E  
TMCO5A  
TTC23L  
ZNF80  
ZSCAN1  
CYP1A5  
ECT2L  
JAFRAC1  
RD3L  
TESCL  
ZFP786  
ALOX8  
MMSA  
PIGBOS1  
PVALB3  
RUVB1  
TCL1B5  
ADCYAP1B  
AGE-1

EPS8L1  
FAM223B  
LIPO1  
MDH1AA  
MIR486-1  
MIR675  
OLFR111  
SUPT5  
TLR2A  
XLR5C  
CYP2J8  
DSG1A  
KASH5  
KDM6BA  
MFSD2B  
MRGPRA2B  
NAG3  
NOCTA  
OLFR345  
PALM2  
PVALB1  
RERGL  
SNORA48  
SSX2  
ZFP563  
ZFP825  
APOA4A  
BRD2A  
ENO  
GPX-6  
GSDMA2  
HCAR1-4  
HMOX  
HSF-1  
HSP83  
LINC01619  
PGP-5  
TNNT2A  
CXORF65  
D3ERTD751E  
HORMAD2  
IGLC2  
SCARNA13  
SNORD75  
ATP5MC3A  
ATP5MPL  
CBLN8  
GST-10  
HOXB5A  
LINC01094  
METTL13  
OLFR1384  
OLFR611  
PAPSS2A  
PGR15L  
SELENOT2  
TAAR7B  
ATP1A1-AS1

C12ORF54  
C7ORF61  
MIR630  
OLFR1122  
OLFR56  
OLFR815  
TPMT.1  
WFDC11  
ZFP777  
ZNF169  
ADAM20  
C16ORF54  
CSAG2  
HEATR9  
KLF2B  
KRTAP19-3  
LINC01137  
MIR660  
RXR  
SPDYE4  
TMSB15L  
VTRNA2-1  
FCGR1B  
LCE1I  
METTL11A  
MIR327  
NDUFA6-DT  
CED-3  
CRY3B  
RGD1565616  
TXNIPA  
ZFP81  
ZFP946  
AGAP7P  
ANKRD36C  
CEACAM7  
EGFRA  
FAM198B  
FAM209A  
MIR151A  
NSUN5P1  
OLFR18  
PAX6B  
PSA  
RBP4L  
RGD1564664  
SMIM10L1  
SNORA68  
UNC5B-AS1  
AHSA1B  
FGFR1A  
HBBE2  
HSPA4B  
NUTM1  
SNORD3D  
VPREB2  
FABP4B  
MYLZ3

SNORD32A  
CROCCP3  
H2-M5  
HMGN5B  
HTR7P1  
KRTAP4-7  
LCE1M  
LINC01138  
PMELA  
TAS2R43  
HBA-X  
PRL7D1  
RARGA  
TFPIA  
TLR21  
APOBEC3D  
BNIP5  
C11ORF94  
C4ORF36  
C6ORF120  
CCDC7  
CFLAR-AS1  
CHRFAM7A  
CRYBB1L2  
DDX11L2  
FAM222A-AS1  
LINC00839  
MIR19B  
MIRLET7BHG  
SCINLA  
STYXL2  
ZNF286B  
CYP2N13  
DAF-2  
RHCE  
ZFP146  
ZFP458  
AKR1C8P  
ATP2B1A  
PFPL  
PLCZ1  
ZNF490  
CTSR  
DEFB9  
ELOVL7B  
H2-L  
HE1.3  
JAKMIP2-AS1  
KRTAP3-3  
OR51I2  
PFK  
ABCG3L1  
SLC20A1A  
TMED1A  
C18ORF21  
NPHP3  
ABCA14  
BLOC1S5-TXNDC5

C5ORF66  
CATSPERZ  
CMC4  
CPXCR1  
DTHD1  
ELOA2  
FAM221B  
FAM86DP  
KIAA1644  
LILRA1  
NUDT9P1  
PRECSIT  
RT1-M5  
SCART1  
SIAH3  
SIRPG  
SLCO6A1  
SNX29P2  
SOX9-AS1  
SP2-AS1  
ZNF155  
APOBB.2  
C22ORF42  
CAPN14  
CC2D2B  
EGFEM1  
FBXO16  
JMJD1C-AS1  
METTL7A3  
SIGLEC7  
TPM3P9  
URB1-AS1  
CALHM4  
FAM29A  
MAGED4B  
OLR1366  
PRL2C5  
PSMC1B  
ZFP334  
ZNF395A  
ARHGAP11B  
C6AST3  
CCDC172  
CEL.2  
EEF2B  
LINC00665  
MIR761  
PNMAL1  
SIRPB3  
ACSM4  
BLID  
C7B  
CALR4  
CYP2J11  
FAM86EP  
HNRPM  
MAT2AA  
MYCA

OR2H1  
SR140  
USP50  
ZFP804A  
INTS11  
MAFBB  
MIR758  
OLFR482  
OLFR608  
OTUD6A  
PRP2L1  
RBM44  
SOWAHD  
ZNF781  
ZNF837  
LINC01558  
SFTA2  
SPESP1  
WFDC10  
ZNF813  
AADACL3  
AMY1C  
CA5BP1  
EAT-3  
ERBB3A  
ES2  
FZO-1  
GCSHB  
LINC01088  
MIR325  
MIR432  
PFN1P2  
PRSS38  
RPL17P33  
RPSAP52  
SPANXN5  
TPTE2P5  
ZNF17  
ZNF658B  
AGAP4  
LYG2  
NHLRC4  
PPP6R1  
SNORD14E  
CKI  
H2-T3  
IGFN1.1  
MIR1260A  
NLRP9B  
SWSAP1  
TBC1D3B  
TCSTV3  
BNIP3LB  
DEFB3  
IGHE  
PHGR1  
SODH-2  
GYLTL1B

OLFR288  
OLFR332  
RT1-CL  
XG  
ZFP532  
ZNF276  
AIP-1  
HISCL1  
NLRP14  
NUP42  
PRL2A1  
SLC4A1A  
TAS2R105  
BIRC8  
MIR26A1  
MIR874  
RAB40AL  
RGD1560010  
RT1-T24-1  
ANKRD20A12P  
FAM41C  
FAM86FP  
LINC00926  
NBEAP1  
OLFR524  
P4HA1B  
PRR19  
PVALB4  
RGD1311595  
SIGLEC14  
THOC4  
CD9B  
DEFB2  
ERV3  
FTH1P3  
LOXL2A  
MMP14B  
PSG28  
SKIV2L2  
ZNF417  
GATA3-AS1  
IL6STP1  
MATN3A  
MRGPRB2  
OR1D2  
PRPS1A  
SELM  
TCTP  
ACTC1B  
LCN3  
OPN1MW1  
ARPIN-AP3S2  
FTH1P20  
GGTLC1  
MLNR  
PA2G4B  
SIGLECG  
SMG1P5

SNORA23  
SNU13B  
TAS2R50  
C9ORF47  
CYP2B21  
MIR129-2  
PAGE1  
ZFP558  
ZNF565  
ZNF90  
ACTB2  
CNBD1  
DELEC1  
DUXBL1  
FAM218A  
GAS2L2  
IGK-V1  
IRGC  
MAFBA  
MAGEB1  
PLSCR5  
RAD21L1  
RNU5F-1  
C1S2  
PXT1  
RGD1311251  
VTG5  
DPY19L2P1  
DRGX  
FBXW12  
HCG27  
HOMEZA  
MUT  
NBPF11  
OLFR1110  
ZNF311  
FAM71E2  
HISTH1L1  
LINC01503  
PLEKHG7  
VCX2  
C9ORF78  
GAS6-AS1  
MIR1249  
MIR147  
MST1P2  
PRSS46  
VMN2R89  
ZNF205  
ALKAL1  
HIST3H2BA  
WHAMMP3  
FOXG1B  
MIR4516  
NBPF8  
OLFR1284  
PLA2G4AA  
RGD1566085

SHP  
SVAL2  
ZNF826P  
H2-M11  
IGHA1  
NEPN  
HIST1H2AF  
KRTAP1-5  
NRK  
SMKR1  
CAV  
CHP  
GTF2H2B  
HBB-BH1  
LRRC63  
PROX2  
SELENOW2B  
TUBA-RS1  
VMN2R26  
ZNF790  
HIST3H2A  
MIR1228  
PRR5-ARHGAP8  
RHEX  
RT1-CE4  
SOD-4  
ZNF252P  
ALDOART2  
AQP3A  
C12ORF43  
IDH  
SDHAP2  
AT  
FAM65A  
GBAS  
LHR  
PONZR4  
PRKRIR  
TPBGL  
TUBB7P  
VIG-2  
GRP94  
HSD17B7P2  
ITGB3B  
MFAP1A  
MIR135A  
NR5A1A  
RGRB  
ZNF283  
AXDND1  
CCL25B  
CYP2B4  
FLICR  
MEF2CA  
MIR299  
PASD1  
MUC  
PRL3D1

RGD1306063  
TADA3L  
ZNF468  
CAHZ  
INSYN2B  
PET100  
PRR29  
ACSL4B  
C1S1  
CKMT2-AS1  
LINC00960  
LYPD8  
MFSD2AB  
MIR924HG  
OLFR555  
PCDHB13  
PNMA5  
PRR21  
SLC3A2A  
SPACA3  
SUGT1P3  
SULT1ST6  
TMEM240  
USP17L2  
C10ORF99  
CYP3A41B  
HE1.1  
MYMK  
NPFFR1  
OLFR339  
TAS2R38  
TMEM174  
ZNF662  
ZNF740  
FMO-2  
HOXA11-AS  
MIR208A  
MIR3074  
MYLPFA  
PRL3B1  
SMAD5-AS1  
THUMPD3-AS1  
OR51B4  
RGD1565033  
TRA  
ZFP654  
ZNF556  
MTNB  
RUSC1-AS1  
VANABIN5  
CXCL8A  
ZNF595  
COX6C-PS1  
STRC  
ZNF233  
FAM106A  
PF4V1  
RNU1B6

HLA-DRB3  
PCDHB20  
ZFP382  
ZNF737  
CMTM1  
IL36B  
SPDYE8  
TOB1-AS1  
ZNF674-AS1  
MFSD6L  
STC2A  
TRY4  
CBR1L  
CESL1  
MIR18B  
TGFB1A  
TTLL13  
ZCCHC11  
ZNF526  
CYP19B  
IGF1RA  
LCE1L  
ZNF594  
ANKRD30B  
GNLY  
LRRC74B  
SDHAP1  
SNORD96A  
ZNF497  
ZNF563  
ZNF699  
BRS3  
CKMB  
FCRL6  
HSP22  
KLK1C10  
MRGPRD  
NR2F2-AS1  
THAP9-AS1  
DBX2  
GPR25  
ACAT2L1  
BRD3OS  
RGD1308742  
ZFP161  
LRRC69  
OLFR153  
TMPRSS11A  
DNAJB1B  
DEFB14  
KLF9.L  
RGD1560242  
SYCE1  
CLEC18A  
JUB  
SH2D7  
SMIM43  
ZNF71

ZNF785  
CCN6  
DAO.1  
FNDC8  
LEPA  
LINC00265  
MIR500  
PDCD4-AS1  
TIGD6  
TUBA3FP  
WDFY3-AS2  
GSTS2  
YF6  
ADAD2  
C7ORF31  
CFAP92  
CYP2K4  
ERVH48-1  
SOA  
TYRP1B  
ZNF772  
C8ORF82  
FSIP2  
TRIM58  
C16ORF86  
MIR125B2  
MZT2A  
RDH8  
SPI15  
TCIMA  
ZNF845  
C3A.1  
CFAP206  
CHK2  
IGHG3  
PCK  
PNP5A  
PSME2P3  
TM4SF  
ZNF48  
ZNF502  
ZNRF2P1  
C5ORF63  
GUCA1C  
HSP-60  
LINC00957  
LINC01018  
ZNF667  
OLFR633  
TBX5A  
RNASE3  
RPS3AP6  
ANKHD1-EIF4EBP3  
LGALS15  
SULT1ST1  
DMRTC1B  
FREM3  
GSTD2

KIAA2013  
PGLYRP4  
RGD1563888  
WFDC6A  
NPIPB5  
RNF212  
SGK2B  
GPRK2  
KIFC5B  
MIR466F-1  
MIR467A-10  
MIR467A-3  
MIR467A-6  
MIR669A-2  
SCGB1B21  
TRAV13N-4  
ZNF75A  
ZNF765  
MIR770  
NLRP1A  
MTNA  
ZNF607  
C12ORF65  
FFAR3  
GPR165  
ASMT  
PKD1P1  
ZFP239  
ZNF571  
C14ORF39  
CCDC42  
IFNG1  
IZUMO1  
MIR31HG  
ODF4  
OR51E1  
PARA-LIKE  
ZSCAN23  
ESRG  
PABPC5  
PHF11B  
RT1-CE3  
SCIMP  
ALPHA-EST9  
CYP314A1  
JPX  
KLF3-AS1  
MIR181B-2  
ZFP184  
AMBN  
CCDC183  
LRP2BP  
PCDHAC1  
RNY1  
SERPINH1B  
ZNF132  
ZNF334  
NHR-121

PBP2  
LINC00515  
ZFP407  
ZNF396  
RS11  
VSIG8  
CYP11A  
LILRA4  
ZNF154  
ZNF701  
ZNF763  
FCGR3B  
KANSL1-AS1  
MCTS2  
MIR205HG  
NPAS4A  
SLC6A10P  
CTGF  
FER1L6  
MIR1290  
ZNF14  
ZNF764  
EAR-PS9  
RPSA-PS4  
VMN2R14  
VMN2R27  
SOD-1  
CROCCP2  
HEN1  
MIR193A-1  
MIR2985  
RPL7P26  
PPEF1  
REN2  
ZNF879  
CEMP1  
DLGAP1-AS2  
ZNF836  
FSBP  
TMEM28  
ZFP874B  
FAM71B  
GADL1  
IFNL3  
ATP2A1L  
C1ORF174  
DYNLL1P4  
ELOBP2  
GAPDHP60  
HLA-DPB2  
KRT18P18  
MIR6333  
MTRNR2L9  
OLFR976  
OLR1442  
PABIR3  
PFN1P9  
RATNP-3B

RNA5SP191  
RNA5SP202  
RNA5SP336  
RNA5SP481  
RPL10AP2  
SNORD48  
TMSB10P1  
TRI-TAT2-2  
UHG1  
VOM2R-PS142  
ZNF345  
ZNF707  
EPPIN  
H2-M10.2  
IFNA  
STRL-1  
TRX  
ZFP944  
IFNA8  
OLFR601  
TRMO  
TTC28-AS1  
CABS1  
CLUHP3  
FAM124B  
FAM63A  
MIR300  
ZNF174  
CKMA  
VEGFAA  
ARRDC3B  
ASL1  
OLFR1095  
OLFR412  
SPIA1  
TMEM202  
USP17LE  
VMN2R20  
CXCL18B  
DLDH  
NCAM  
BFB  
VSTM2B  
ZNF253  
ZNF669  
ZNF69  
CYP-35A5  
ELA3L  
MFRP  
MIR669A-3  
OLFR1352  
SPATC1  
SSTY2  
CYP-35B3  
MIR3076  
KIR2DS3  
CFAP58  
IFNA17

LINC00467  
NINAB  
POM121L2  
TMEM99  
MIR501  
ACTN2A  
ALKAL2A  
AP1S3A  
C17H15ORF52  
CDAB  
DOCK2-LIKE  
ELFN1A  
FMNL1B  
GFI1AB  
GHSRB  
HBB2  
KCNAB1B  
KCNK10A  
KCNK1B  
KIF5AB  
MPP7B  
MRV1  
PDE1CA  
PROZA  
PTPN9A  
RANBP3B  
RHOTB2A  
SLC1A7B  
TMEM151BA  
USP43B  
ZFP646  
ZNF1159  
CIBAR2  
PINLYP  
SLC26A8  
SRGAP2C  
NHR-14  
NHR-69  
TESTIN  
ZNF780B  
C06H2.2  
C12ORF76  
SOX5OS3  
VMN1R184  
SKIP  
BAIAP2-DT  
KAL1  
STPG4  
MIR1901  
MIR1982  
MIR28B  
MIR3083  
MIR3088  
MIR3108  
MIR3113  
MIR344G  
MIR5127  
MIR669J

MIR873A  
SUN3  
TTC31  
IFNA16  
ZSCAN30  
CFAP161  
CYP2A21-PS  
ADAM26B  
DEFB46  
HB  
OLFR58  
VMN1R124  
VMN1R64  
ERICH3  
OLFR1404  
ATG1  
MIR3573  
LCTL  
APOBEC3A  
TMEM17  
ZBTB11OS1  
ZNF470  
ELA2  
BEST4  
MARCFH11  
TCP10L  
ACTG1P9  
CUTALP  
EPT10  
EPT13  
EPT2  
EPT6  
EPT9  
HIST2H2AC  
LIMD1-AS1  
MIR374  
NTAQ1\_ANOGA  
NUBP1\_ANOGA  
OLR1757-PS  
RPL27-PS1  
SHISAL2B  
SNORA15  
SNORD113-4  
SNORD126  
ABHD15A  
ADD3B  
AKR1B1.2  
ANO1A  
ANO9B  
CIRBPA  
CLDN23.2  
CRACR2AA  
CUL5A  
DDX61  
DEPDC7A  
DEPDC7B  
ELAVL1A  
EPHA2B

FZD7B  
GIG2O  
GRB2A  
HIST1H2A6  
HIST1H2A8  
HSP20  
IFI27.1  
KRT18A.1  
LFT2  
LINC.SETD1BA  
MC6ZB  
MCF2A  
MIER3B  
MS3\_0012184  
MS3\_0015983  
MS3\_0016535  
MS4A17A.2  
MSL2A  
MXTX1  
MXTX2  
PITPNC1B  
PKDC  
RASSF4A  
RBM14A  
RNF165A  
RNF213B  
SLC7A1B  
SPHM  
TRIM35-29  
TSG101B  
VG\_1  
ZMP:0000000991  
ZNF319B  
ZP3E  
ZP3F.1  
AKT-1  
CRZ  
CYP2J13  
CYP4G7  
EEF1DP3  
EIF3FP2  
FRMD8P1  
GALP  
GSTE4  
REA  
TREM5  
LIN-29  
MIR577  
MUP-PS21  
RPL21P4  
RPL23AP1  
H2BU1  
IGHV9-2  
KRTAP1-4  
LINC00472  
MIR3965  
MRCL3  
OLFR1385

OLFR147  
OLFR825  
PPAR  
ZFP953  
ANTXR1B  
C11H19ORF12  
C3H1ORF198  
C3H6ORF203  
C6H10ORF88  
CALN2  
CATHL2  
CELF5B  
CMASB  
CYP2J21  
FAM192A  
FAM200B  
FAM78BA  
FTR19  
FY  
GADD45GB.1  
HES2.2  
HMX3B  
KRT95  
MAPTA  
MO25  
OPN1MSW  
PARP4P2  
PCDH2AA3  
PCDH2AB7  
PCDH2G1  
PCDH2G12  
PCDH2G16  
PCDH2G29  
PCDH2G3  
PCDH2G4  
PCDH2G6  
PCDH2G9  
PMCHL  
RPGRB  
RPP20  
SCRT1A  
SPIN1Z  
TMEM63BB  
UGT2B28  
ZNF1156  
CFAP20DC  
OLFR541  
RMCS2  
OLFR1371  
PRL3D4  
AF357426  
D1ERTD705E  
DEFB34  
DQ267102  
GPR141  
IGKV2D-29  
KCTD21  
KRT90

MARCOL  
RNA5SP366  
RNA5SP63  
RNA5SP74  
RNU5E-4P  
RNY3P2  
RNY4P5  
RUBIE  
SCGB1B3  
TOMT  
TRE-TTC9-1  
TRY-GTA11-1  
VWA5B1  
AMER3  
C12ORF66  
MIR7020  
MIR7085  
SLC6A21  
OLFR311  
OLFR784  
SAGG  
GDF7  
LINC01006  
DPEP3  
GNRH3  
BTN2A1  
CIR1  
ESP38  
HSP90  
MIR1952  
MIR21-1  
MIR21-2  
MIR3087  
MIR3584  
MIR7039  
MKP3  
MRGPRB8  
SLUG  
ACSL3A  
C1QL4A  
CCDC80L1  
CPLX4A  
DCUN1D2B  
DLGAP4A  
DNAJC30B  
FMNL2A  
GRIA4A  
GSDF  
HOXC10A  
HS6ST3B  
IRX6A  
KANSL1A  
PAOX1  
PARD3BB  
PDE4BB  
PLPP7A  
RAB14L  
RPE65B

SFXN5A  
SLC44A5A  
STXBP1A  
TEAD1A  
TIPE  
TRAK1A  
TRPC2B  
XKR6B  
ZEB1A  
AER61  
DNMT2  
EH  
IF4  
PHOX2  
TRAV6D-6  
VOM1R3  
VOM1R4  
VOM1R43  
VOM1R72  
VOM1R75  
VOM1R82  
VOM1R84  
VOM1R89  
VOM2R72  
TUBB8B  
ATPSYND  
MIR1246  
PI3K92E  
TER94  
TRNM  
H2BC23  
IGH-V  
MUP15  
OLFR16  
VIT-6  
VMN1R32  
ARF6B  
CDH14  
CUX2A  
D1ERTD646E  
D3ERTD162E  
FGD4B  
FTR07  
GCNT4B.1  
GPR155B  
JAZF1A  
MESPBB  
MIR1934  
MIR1962  
MIR2139  
MIR3059  
MIR3067  
MIR3090  
MIR3110  
MIR3962  
MIR3966  
MIR5621  
MIR718

NEO1A  
NMUR1B  
NPAS4B  
OLR392  
SPINT1B  
TRIP10B  
VMHC  
OLFR1494  
OLFR152  
OLFR890  
SNORD111  
TEX16  
C79685  
ZNF318  
ZNF567  
APOA  
CHIA\_1  
CYP2A19  
DMRT4  
ESP15  
ESP8  
HINTW  
IGKJ2  
KCT2  
OLFR1372-PS1  
SPEER4B  
ZNF514  
ANKRD52  
ARHGEF7-IT1  
BTBD35F20  
DNAH17-AS1  
DNMT3AOS  
EIF4G1.S  
FAM240B  
GOT2P1  
LRRC37A5P  
MIR650  
OBP99A  
PHXR2  
PSG20  
TRAV8-3  
VMN1R-PS8  
ZEN  
ZNF29P  
TRPL  
COL-14  
IGKV4-77  
MAS  
MIR658  
OFA  
PLK-PS1  
PRDX2-PS1  
PSG-PS1  
RNU1A1  
SOCS3A  
TCRA-V11.1  
TRAV6-2  
TRP53-PS

ZFP783  
CRYGEP  
KIR3DS1  
C86807  
DHRS7\_ANOGA  
MRGPRA3  
ZFP648  
AOC2-PS1  
CHK-1  
CKN1  
ESCO2-PS1  
GUS  
IGKV4-81  
KLK1B7-PS  
MIR6326  
OLFR1023  
OLR1459  
OLR1667  
OLR231  
OLR443  
OLR611  
RGD1561206  
RGD1562462  
RGD1564095  
SEC61G-PS1  
VMN1R50  
VMN1R76  
VOM1R27  
ZFP353-PS  
ACVR1L  
ADGRF3B  
AFG1LA  
ASF1BB  
BAZ2BA  
BRD3A  
BUC2L  
CDH7A  
CDKN1CB  
CLDND1A  
CLK2B  
COL6A4A  
DAB2IPA  
DDX3XA  
DRLL.3  
EF-1G  
ENTPD5A  
EPC1A  
EPS8L1B  
FGF18B  
FOXP3A  
FTR67  
GJB1B  
GOLGA7BA  
HCCSA.1  
HNRNPABA  
IRGQ1  
IRX7  
JAK2A

JAK2B  
KAZALD2  
KITLGB  
KLF7A  
LARP4AB  
LARP6B  
LCTLB  
LGALS13  
LIPIA  
LYG  
MAPK12B  
MEGF6B  
MIER1B  
MRTFAB  
NF1A  
NIBAN2B  
NTRK3B  
OR13C5  
OR7D4  
OVOL1A  
PCSK5A  
PIP5K1AA  
PLAGX  
PLD1A  
PPP2R5EA  
PPP3CCA  
RAB34A  
SALL3A  
SP5A  
SRSF7A  
STAG2B  
SYT7B  
TAGAPA  
TAOK2A  
TLE2A  
UBN2B  
WNT7BA  
ZNF1041  
ZNF1059  
ZNF143B  
ZNF983  
ZPAX2  
KRTAP5-3  
ARP5  
FTH1P1  
HEXO1  
KIS  
KRT18P44  
KRT18P50  
MTF  
TDGF1P5  
UNG-1  
ACT1  
CYP2C45  
KIAA1024L  
LINC02656  
MIR290  
MIR347

MIR3473B  
OLFR591  
OLFR776  
OLR396  
POTEB3  
RPRL1  
SPINK11  
STK-PS2  
VMN1R37  
VMN1R80  
VMN2R116  
DICER1-AS1  
EAP30  
FRS3OS  
LARP  
MLN51  
OLFR466  
SBP2  
ZFP934  
ZNF569  
ACL  
ASB2B  
C5H14ORF159  
C7H2ORF47  
CACNG5A  
CBX1B  
CDC25  
CYP17A2  
DOCK4B  
FUT9A  
GSL  
IGHV1-20  
IL8L1  
KIF1AA  
LRFN5B  
MAGE  
MCCC2L  
MIR3526  
MPP6B  
OLFM1A  
PCDH1A6  
PCDH1G2  
PCDH1G33  
PCDH2AA1  
PCDH2AB10  
PCDH2AB11  
PCDH2AB3  
PCDH2AB5  
PCDH2AB6  
PCDH2AB9  
PCDH2G20  
PCDH2G5  
PCDH2G7  
PCDH2G8  
PHACTR3B  
PIH1D3  
RAB6BA  
RGD1564243

RGD1565844  
S100S  
SEZ6B  
SLC35G2B  
SLN35-A  
SS2  
STX5AL  
TAFA5A  
THSD7AB  
TMPOA  
TRPC5A  
ZNF995  
ABU-2  
C21ORF58  
PQN-76  
PQN-91  
PRX2540-1  
ACSBG3  
BTNL7-PS  
CCPN-PS  
CPG21  
CSMD2OS  
ECRG4B  
FBXW27  
IGHV1-31  
IGHV4-2  
IGHV5-12-4  
IGKVK33-85  
KCNMB4OS2  
KHDC1B  
KRT87  
LYPD9  
MIR1251  
MIR135A-2  
MIR1943  
MIR1945  
MIR1968  
MIR3060  
MIR3063  
MIR3089  
MIR3093  
MIR3097  
MIR344F  
MIR466M  
MIR5620  
MIR5625  
MIR6539  
MIR705  
MIR7116  
OLFR257  
PIMR115  
PIMR191  
PMIS2  
PSG22  
RGD1561648  
SCGB2B20  
SCGB2B7  
SPINK12

TEX13C3  
TRDV2-2  
UBTD1B  
ZFA-PS  
ZNF1043  
AVBD1  
CYP6Z1  
EPP13  
HOXD3OS1  
KRT18P49  
OLFR1002  
RHOX2A  
SNORD1B  
TRG-CCC6-1  
TRNC  
ZFP935  
C25A8.1  
CLDN34B  
COL-182  
DDIT4L2  
DIRAS1A  
F27E5.5  
F54D12.1  
GSTM.2  
K07F5.7  
KRTAP16-5  
MAGEB1L1  
MAP1SB  
MIR5132  
NEDD8L  
NHR-169  
NHR-244  
OLFR688  
OLFR697  
OLR1151  
OLR1194  
OLR1196  
OLR1222  
OLR1345  
OLR1369  
OLR1456  
OLR1529  
OLR1582  
OLR1588  
OLR161  
OLR1675  
OLR1731  
OLR223  
OLR279  
OLR282  
OLR283  
OLR313  
OLR325  
OLR376  
OLR39  
OLR476  
OLR495  
OLR5

OLR541  
OLR577  
OLR621  
OLR624  
OLR646  
OLR669  
OLR671  
OLR702  
OLR714  
OLR727  
OLR782  
OLR812  
OLR848  
OLR916  
OLR952  
OXR1A  
PTPRNA  
RGD1562558  
RGD1564513  
RPH3AB  
SLC6A11B  
SRB-12  
SRB-13  
SRBC-11  
SRBC-70  
SRH-145  
SRH-187  
SRH-22  
SRI-27  
SRSX-13  
SRX-17  
SRXA-2  
SRZ-74  
SSP-19  
STR-108  
STR-145  
UGT-10  
VMN1R114  
VMN1R207  
VMN2R33  
VMN2R73  
VOM1R14  
VOM1R95  
VOM2R29  
GPR33  
OLFR344  
RPL13P5  
RSKR  
RAPTOR  
RGD1565588  
SMAD3A  
KLRA14-PS  
MAGEA9B  
MIR30C-2  
MIR6370  
MIR7018  
ASAP1B  
BTR32

CREB5A  
CRLF1B  
ENDOU2  
GPD1A  
GRHL2B  
HIPK1A  
HSPD1P7  
KCNH5A  
KLHL43  
LINC00837  
MAGI2B  
MIR320C2  
MIR5087  
MIR527  
MIR548N  
MIR719  
NLGN2B  
NRBF2B  
NRBP2B  
PANDAR  
RGPD2  
RPLP0P1  
SNORD7  
TP53COR1  
TSPAN9B  
ACOX57D-P  
AMY-P  
C1GALTA  
CACNG1B  
CASP8L1  
CBT  
CBX6B  
CHTOPB  
CNN1A  
CP19  
CPR100A  
CPR49AB  
CPR49AD  
CYP11A2  
CYP317A1  
CYP6A20  
CYP6A9  
CYP6T3  
CYSLTR2B  
D17ERTD165E  
D9ERTD115E  
DMGLUT  
DRD4A  
DRSL1  
DSX  
E  
ECT3  
ELOF  
FC18A08  
FJ  
FUSL  
GIIISPLA2  
GS2

HECW1B  
IGKJ1  
IM  
IN  
INVADOLYSIN  
IR31A  
IR52B  
KARL  
KOP  
LIN-28  
LRT  
MACON1  
MAL-B1  
MED19A  
MIR1301  
MMP17B  
MOB1BA  
MOL  
MTERF1B  
NACHRBETA3  
NPC2D  
NXPH2B  
OBP56E  
OBST-B  
OLFCK2  
OR45B  
OSI8  
OUT  
PGRP-LB  
PGRP-SB1  
PK1-R  
RDGB  
RIC3B  
RNP4F  
RNU2  
RPL5A  
RUMI  
SC  
SCOCA  
SEPT7B  
SER8  
SMVT  
SNMP1  
SRO  
TLCD5A  
TMEM169B  
TMEM182A  
TMEM264  
TOBI  
TOR1  
TRK  
TSPAN2A  
UGT302E1  
UGT37C2  
UGT37E1  
ZFP599  
ZMP:0000001200  
ZNF687B

ADH5P4  
ATP6V0CP1  
BMM  
DPP6A  
EIF4G  
FAM83A-AS1  
FER1L6-AS2  
FTH1P19  
GGA3T.3  
KCTD9P2  
KIRREL3-AS3  
LINC00315  
LRRC53  
LY49S3  
METHIG1  
MIR105-1  
OR2T33  
OR7E19P  
RPL10P12  
RPL27P2  
SKINT1  
VN1R10P  
VOM1R45  
VOM1R71  
VOM1R86  
VOM2R41  
VOM2R54  
VOM2R7  
ZFP979  
IL11B  
INR  
LINE  
RN5S  
TRNP  
CYP3A29  
EGG-4  
OLR37  
PRO2268  
RAB1C  
ACOT18  
ADGRG11  
ADGRL2A  
CCNT2B  
CHCHD4B  
CNOT6B  
CREB3L3L  
CREBBPB  
CYP3A24  
DIABLOB  
EIF4BA  
ENC3  
FRMD4BA  
GNA15.1  
HER11  
HER5  
ILDR1B  
MIR1A-1  
MIR6216

MORC3B  
NME2B.1  
NUPR1A  
PHACTR4A  
PKDCCB  
PPP1CAA  
RBPMS2A  
SALL3B  
SCARNA23  
SETB  
SH3BP5LA  
SHISA2A  
SLBP2  
SMARCA4A  
SNORA58  
SP140L  
SSH2A  
SZL  
TARDBPA  
TMEM51A  
TRPC4APA  
ULK1A  
WASLA  
YY1A  
ZFPM2B  
143B1  
ATOH1B  
BEAT-VB  
BETACOP  
CCS1  
DELTACOP  
FSCN2B  
GCL  
HMGN2-PS1  
MLRN  
NG  
OLR1132  
OLR1160  
OLR1223  
OLR126  
OLR1279  
OLR1525  
OLR156  
OLR1565  
OLR1621  
OLR206  
OLR208  
OLR375  
OLR453  
OLR659  
OLR742  
OLR832  
PRDX-2  
REL1  
RGD1562036  
RGD1564571  
RL23A  
RPS3.L

SAGE  
SAKS1  
SAP47  
SRCR12  
SYX5  
TACD2  
TUBB3-PS1  
VEGFR-1  
VOM1R8  
VOM1R88  
ABHD10B  
ADAM19B  
ADPGK2  
ASF1  
ATP6AP1LB  
ATPV0E2  
BMI1B  
CACNA1HB  
CCDC106B  
CCNB1L  
CCNT2A  
CNOT4B  
COL12A1B  
CRYGM2D3  
CRYGM2D7  
D14ERTD725E  
DRD6B  
EPN3B  
FAM49BA  
FAM83FA  
FHOD3A  
GLRBB  
GRIA2A  
H2-T18  
KAZNA  
KDM5BB  
LIFRA  
LNX2B  
LRIT3B  
MESPAA  
MIR1930  
MIR3103  
MIR697  
MMP20A  
OLR1384  
OLR48  
OLR724  
OLR95  
OPN4B  
PIMR75  
PTPN2B  
RARGB  
SDHDB  
SEC14L8  
SLC17A9B  
SLC2A3B  
SLC7A8B  
ST6GALNAC1.2

UACAB  
ZFP862  
ZNF613  
ZNF740A  
CRMP  
CYP51A1P2  
HMG2L6  
OLFR1229  
OLFR1387  
OLR1423  
VMN1R214  
ACE-1  
ALPHA-EST7  
CEP112IT  
CSTA2  
D4ERTD58E  
D5ERTD615E  
IGH-VS107  
IGKV1-35  
IGKV4-50  
IGKV4-79  
LAP  
LCE1J  
MCCC1OS  
MIR129B  
MIR344C  
MIR6373  
MIR6412  
MIR6904  
MIR6909  
MIR6950  
MIR6952  
MIR6976  
MIR7678  
MIR883B  
NRG3OS  
OLFR1171-PS1  
OLFR664  
OLFR75-PS1  
OLFR9  
PANCT2  
PITPNM2OS1  
PRAMEL13OS  
S100A11-PS  
SDHB-1  
SPAG11BL  
SULT2A-PS2  
TACO1OS  
TGIF2LX2  
TMA7-PS  
TRAV16D-DV11  
TRAV6D-5  
TRIM30C  
VMN1R151  
VMN1R45  
VMN2R3  
VMN2R-PS111  
ZFP652OS

ABTB2A  
ATP12A-LIKE  
ATP5F1AW  
AVBD7  
AVDL  
BCRP2  
BTBD3A  
C22H8ORF4  
CNTNAP2A  
CPR8  
CRABP  
EEF1B2P5  
G12  
GRIA1A  
GRID1B  
HOX3  
HOXC3  
IF2  
KCNJ11L  
KCNQ2A  
LRTM2B  
MEIS  
MYL9A  
MYT1LA  
NOL4LA  
NOS1APB  
NPHS1OS  
NPTNB  
OR7H2P  
PCDH1A  
PCDH1G18  
PCDH1G26  
PCDH2AB1  
PCDH2AB8  
PITX  
RAB42A  
RCVRN.1  
RGD1311300  
RGD1559588  
RNF145A  
RPR  
SHISA9B  
SPRB  
TECRA  
TH1L  
TMEFF2A  
TMSB2  
TPCN3  
XA-1  
ZNF729  
BIN2A  
BMP7B  
CAB39L1  
CICA  
DENND2DA  
IGKV12-98  
PLEKHN1  
SHANK3A

SPINK10  
STXBP5A  
TRD  
ALDOB.L  
BCAR3-AS1  
MAGMAS-PS1  
METTL21E  
RAB35B  
SPE-4  
SWM-1  
BIN2P1  
EGL-9  
LCAL1  
LINC00527  
LOK  
MMP1B  
OLFR62  
OR1E3  
PAXBP1-AS1  
TCAF3  
MIR195A  
MSMP  
BTNL5-PS  
CYP2C2  
DEFA-PS1  
DPY-4  
DPY-7  
DPY-9  
HMOX1B  
IF  
IGKV8-30  
LGALS3BP.3  
MOB1BB  
MUP8  
OLFR1442  
OLFR78  
SMTLB  
AVBD6  
BCAR4  
LDH  
MIR3086  
MIR3109  
MIR5107  
MIR666  
MIR875  
MMP11A  
PRL5A1  
RDH3  
TB  
THP2  
AATKB  
ACTG1P20  
ADMB  
ALDH3A2A  
ANXA3A  
ARHGAP12A  
ATF7A  
B3GNT7L

BCL2B  
CCKA  
CHMP5A  
CHRNA3A  
CLOCKB  
CORO1CB  
DBNLA  
DDHD1A  
DHRS13B.1  
DNAJC16L  
DNAJC5GB  
EPN3A  
FAM20CA  
FAM219AB  
FIBINB  
FMNL2B  
FNDC4B  
FNDC7A  
FTR20  
GABPB2B  
GLIPR1B  
GPR137BB  
GRM8A  
HIVEP2B  
HMGXB4A  
KCNH4B  
KDELRA  
MAFAA  
MAN1B1B  
MCOLN1B  
MERTKA  
MSL2B  
NFYA  
NLGN3B  
NT5C2B  
OGDHB  
PPP1R3AA  
PRSS60.2  
RAB33BA  
RPH3AA  
SEPH  
SLC2A13B  
SLC35A3A  
SLC35G2A  
SLC44A1A  
SMX5  
SNX8A  
STOX2B  
SVOPA  
TEAD3B  
TMEM30AA  
UNM\_HU7910  
WAPLA  
ZMP:0000000606  
ZMP:0000000711  
ABHD11OS  
ACKR3B  
ART2A

CD44A  
CHRM2A  
DDX3XB  
EHMT1A  
FOXD5  
GAGE4  
GRINAB  
HNRNPUB  
INO80DB  
ITPK1A  
NIBAN2A  
OLFR1087  
OLFR1102  
OLFR1135  
OLFR1157  
OLFR1242  
OLFR129  
OLFR13  
OLFR1360  
OLFR141  
OLFR1512  
OLFR237  
OLFR560  
OLFR623  
OLFR739  
OLFR741  
OLFR746  
OLFR845  
OLFR983  
OLR421  
PAFAH1B1B  
PHO  
POU5F3  
PRL8A1  
PSME2B  
RBM4.2  
RGD1559859  
RGD1561185  
RGD1562660  
RGD1563747  
RGD1565590  
RHOAA  
RPL36A-PS3  
RXFP2A  
SEMA6DL  
SETDB1A  
SLC25A55A  
SMARCC1A  
SMN  
SRSF1B  
STARD14  
SUMO3A  
SUMO3B  
TIAF2  
TMPRSS4A  
TMPRSS4B  
VMN1R44  
AFR2

ALBFM1  
BTBD35F1  
C80012  
CRYZL2  
CYP3A71-PS  
CYP51A1-PS1  
D7ERTD413E  
D9ERTD338E  
DAF-18  
DNAJA1-PS  
FRG2F1  
GCNT6  
GGNBP2OS  
HSPD1-PS19  
HSPD1-PS8  
HSPE1-PS2  
IFI207  
IGKV4-62  
IMPDH2-PS  
LY6G2  
LYRIC  
MIR340-2  
MIR3577  
MIR434-2  
MIR466F-3  
MIR5124A  
MPH1  
MUP-PS1  
MUP-PS11  
MUP-PS13  
MUP-PS15  
MUP-PS2  
MUP-PS6  
MUP-PS7  
MUP-PS8  
MUP-PS9  
NDUFS5-PS1  
NUPR1L1  
OLFR446  
OLFR449  
OLFR64  
OLFR645  
PROX1OS  
PSME1-PS1  
RGD1559499  
RGD1560234  
RGD1560795  
RGD1561787  
RGD1562140  
RGD1562387  
RGD1563322  
RGD1564292  
RGD1564585  
RGD1564981  
RGD1565361  
RGD1565664  
RGD1565988  
RGD9310068

SAA-PS  
STAU  
TMEM250-PS  
UGT1A4-PS  
B3GNT10  
CYP2AB4  
CYP2J22  
CYP2J24P  
OLR25  
TRAV7-4  
CACNA1SB  
D2ERTD295E  
DEFB17  
HIF-1  
KCNQ5A  
KLRH1  
LY49I7  
LY49I9  
MRGPRB13  
OLFR125  
PFC  
RGD1309998  
SU(R)  
VIPR1B  
VOM2R22  
VOM2R75  
VOM2R80  
A2MP1  
ATP6V1G2-DDX39B  
BOULE  
C1QTNF3-AMACR  
C9ORF84  
CTSSL  
DCDC5  
DENND5B-AS1  
DRP1  
EIF2S3B  
GATD3B  
HSTRPA  
IGLV3-25  
LCA10  
LINC00559  
LINC01719  
LINC01844  
MIR1292  
MIR3141  
MIR3162  
MIR3200  
MIR376A1  
MIR4280  
MIR4505  
MIR4667  
MIR4669  
MIR4701  
MIR5106  
MIR519D  
MIR520C  
MIR6753

MIR6820  
MIR6865  
MIR7843  
MUC3B  
NHR-119  
NHR-171  
NHR-194  
NHR-210  
NHR-246  
NHR-261  
NPIPA7  
OLFR1038-PS  
OLFR371  
OLR1323  
PIP5K1BA  
RN7SL3  
RNA5-8SN1  
RNA5-8SN2  
RNA5-8SN3  
RNU5A-1  
RNU6-807P  
RNU6-9  
RPSAP15  
RSL24D1P3  
SERTM2  
SLX1B-SULT1A4  
SMG1P6  
SNORA10B  
SNORA17A  
SNORA31B  
SNORA35B  
SNORD115-32  
SNORD13P2  
TAS2R126  
UNC-55  
V165-D-J-C MU  
VCAN-AS1  
VLC  
VOM2R1  
ADAM24  
ASB14B  
ASB5A  
C1H21ORF91  
CCDC88AA  
CELF5A  
CRISPLD1B  
CRYGM6  
CRYGS2  
GABRB4  
GRIA2B  
HER2  
HES2.1  
IGSF21A  
MTNR1BB  
NOG3  
OTX5  
PARP6A  
PCDH1G32

PCDH1G9  
PIMR173  
S100T  
SLC6A6A  
TNK2A  
B0334.6  
BATH-36  
C02D5.4  
C13A2.12  
C21ORF62-AS1  
C24H12.2  
C39F7.5  
C43D7.7  
C47E8.3  
C49F5.6  
CNC-11  
CPR-4  
DCPP2  
EEF1E1-BLOC1S5  
F07C6.6  
F17B5.8  
F17C11.15  
F39B2.14  
F43D9.8  
F46C3.7  
F53G12.9  
FBXA-95  
GMD-2  
HLA-DPA3  
K07C5.10  
LINC01193  
LINC-72  
LIPL-3  
M110.8  
M162.9  
MATH-43  
NSPB-8  
RAET1E-AS1  
VMN1R30  
W06H8.12  
Y24D9A.9  
Y37H2A.18  
Y37H2A.7  
Y47G7B.2  
Y51B9A.8  
Y54G2A.48  
Y57G11A.5  
Y7A5A.10  
ZK637.18  
ABU-3  
ABU-5  
CYP-13A6  
FIT1  
GLYP  
IGKV13-84  
IGKV7-33  
ILP5  
MIR1B

MIR218-2  
MIR569  
MIR639  
MIR645  
MIR677  
MSTNA  
OLR1350  
OLR197  
PQN-78  
PRX6005  
SYNJ2BP-COX16  
ACD-1  
ACDH-6  
ACKR4A  
ACLY-1  
ACPL2  
ACSL2  
AEP1  
AKT2L  
ALDH9A1A.2  
ALH-6  
AMPD3A  
APOOB  
ARGLU1B  
B0025.5  
B0238.18  
B0238.9  
B0285.T1  
B2ML  
BE0003N10.3  
BED-3  
BGNT-1.8  
BON  
C01B10.11  
C01G6.3  
C02B4.8  
C02D4.15  
C02F4.4  
C04F1.1  
C06B8.T2  
C06E7.4  
C08A9.10  
C08D8.3  
C08G5.7  
C13C12.2  
C14B9.T2  
C16C8.21  
C16D9.12  
C17B7.12  
C17E7.9  
C27A7.2  
C28H8.5  
C29E4.14  
C30G7.4  
C33F10.17  
C33F10.21  
C33H5.2  
C35B1.4

C35B1.8  
C36C5.5  
C44B7.5  
C50D2.1  
C52A10.4  
C54D10.16  
C54D10.3  
C79461  
CACNA1FB  
CACNB4B  
CCDC85AL  
CCN1L1  
CDK5R1B  
CELSR1B  
CEST-35.1  
CHE-14  
CLIC  
COL-111  
COL-131  
COL-135  
COL-152  
COL-65  
CPG2  
CPT-1  
CRYGM2D1  
CRYGM2D21  
CRYGM2D4  
CYP-33B1  
D1014.6  
D1014.7  
DAF-28  
DDO-3  
DHARMA  
DHS-18  
DHS-20  
DKK3B  
DNAJB9B  
DPF-1  
E03E2.T2  
E03H4.4  
ECH-8  
ENDU-2  
EXC-4  
EXP-2  
F01D5.6  
F01G10.10  
F07C6.5  
F08G5.14  
F10D2.10  
F10D2.15  
F15E6.10  
F16A11.9  
F17B5.1  
F21C10.11  
F22B7.T1  
F22F7.3  
F22H10.9  
F22H10.T1

F23A7.4  
F28D1.13  
F30A10.14  
F32H2.11  
F35E8.18  
F35F10.5  
F36H12.10  
F36H12.5  
F38E11.11  
F41C3.2  
F41G3.10  
F42D1.6  
F43G9.15  
F43G9.18  
F44A6.5  
F45D11.15  
F45D3.3  
F46C8.8  
F49C12.1  
F49C12.2  
F49C12.3  
F49C12.4  
F49C12.5  
F49E12.12  
F52F10.2  
F53B1.2  
F54D10.8  
F54F7.3  
F56F10.10  
F56F4.10  
F57C2.4  
F58A6.1  
F59A6.11  
F59D8.3  
FAM117BA  
FBXW22  
FHDC3  
FIP-2  
FIPR-10  
FIPR-8  
FKH-9  
FMO-4  
GLB-1  
GLI2A  
GLY-1  
GNB5B  
GRH-1  
H12I13.6  
H23N18.5  
H36N01.3  
IGHV1-66  
IGKV2-116  
IGKV4-51  
IGKV4-63  
IGKV8-16  
IGKV8-34  
IIGP1B  
IMP-3

INS-30  
K01A2.5  
K01A6.7  
K02E11.10  
K06A4.13  
K06C4.20  
K07A1.6  
K08C7.4  
K10C2.8  
K11H3.T2  
KIFL  
KLRA20  
LAYNB  
LCTLA  
LFOR-2  
LGALS8A  
LIN-12  
LIPS-10  
LIPS-15  
LIPS-3  
LONP-2  
MAM-2  
MATH-3  
METRNLB  
MF-CPA  
MIR130A-1  
MIR3472  
MIR3576  
MIR461  
MIR606  
MIR732  
MORF4L1-PS1  
MPST-6  
MSA-1  
MSP-58  
MSP-71  
MUG4-PS  
NAB1A  
NAS-36  
NAS-7  
NEP-16  
NEP-23  
NHR-161  
NHR-205  
NHR-234  
NHR-267  
NHR-62  
NITR8  
NPR-1  
NSPB-2  
NSPC-1  
NSPC-16  
NSPC-19  
NSPC-2  
NSPC-4  
NSPC-6  
NSPC-7  
NSTP-8

OAC-10  
OAC-28  
OAC-46  
OCR-1  
OLFR1269  
OLFR1336  
OLFR223  
OLFR684  
OLR1218  
OLR1219  
OLR1220  
OLR1238  
OLR1239  
OLR1415  
OLR1596  
OLR20  
OLR567  
OR119-2  
OXSR1B  
PALS-23  
PFKPA  
PGAM1-PS2  
PHO-9  
PIMR62  
PPS-1  
PQM-1  
PQN-74  
PRDM16OS  
PRX-11  
PST-1  
PTC-3  
PTR-11  
PTR-15  
PTR-16  
PTR-6  
PUD-2.2  
PXNA  
R02E4.3  
R03G8.6  
R04B3.3  
R05A10.4  
R07E5.4  
R09F10.17  
R11F4.1  
R74.2  
RAPGEF5B  
RBM24B  
RDH14B  
RHOX7  
RNCS-1  
RPL23AP37  
RPZ5  
RRN-1.1  
RRN-1.2  
RRN-2.1  
RSF1OS2  
SCGB2B26  
SINUP

SLC2A15A  
SLC37A4B  
SLC47A4  
SMC1AL  
SQT-2  
SRPR-2.2  
SRU-40  
SRXA-3  
SSP-33  
ST3GAL3B  
ST8SIA7.1  
SWSN-7  
T01B4.4  
T01D1.3  
T01D1.4  
T04A8.13  
T05B4.14  
T06E4.12  
T06H11.T1  
T07G12.3  
T08B2.12  
T16A9.6  
T16G1.13  
T17H7.7  
T19B10.2  
T19B10.5  
T19C4.17  
T19C4.T1  
T24A11.5  
T24D3.2  
T27A10.8  
TAG-297  
TAO  
TLK1A  
TPST1L  
UBE2AL  
UGT-35  
ULE-1  
VMN1R53  
VMN2R43  
VMN2R71  
VMN2R84  
VMO-1  
VT23B5.1  
W01C9.6  
W02D9.7  
W08D2.9  
Y105E8A.42  
Y11D7A.9  
Y18H1A.T1  
Y25C1A.13  
Y26D4A.24  
Y34B4A.10  
Y38A10A.2  
Y38C1AB.1  
Y38F2AL.11  
Y40C5A.19  
Y40C5A.22

Y42G9A.8  
Y43F4A.6  
Y48A6B.9  
Y51H4A.T2  
Y52B11B.1  
Y53G8B.2  
Y54E2A.7  
Y57G11C.1130  
Y58A7A.1  
Y59E9AL.2  
Y62E10A.19  
Y62H9A.3  
Y65B4BL.6  
Y69A2AR.44  
Y71F9AM.8  
Y71G12B.18  
Y73B3A.24  
Y73B3A.28  
Y73C8B.1  
Y87G2A.2  
Y95B8A.16  
Y9C9A.16  
ZC21.3  
ZC373.2  
ZC455.14  
ZDHHC20A  
ZFP974  
ZK1025.2  
ZK1025.4  
ZK1025.5  
ZK1025.8  
ZK1067.10  
ZK546.3  
ZK550.6  
ZK792.4  
ZK813.3  
ZK813.7  
ZK897.2  
ZK897.4  
ZMP-6  
ZP2.1  
APOL7E  
BVHT  
CLEC6A  
CLN9  
DEFB27  
H2  
H2-M1  
HIST1H2A11  
NDUFA4A  
SAA2-SAA4  
42SP43  
42SP50.L  
ACSS2.1  
ADA.2  
ADRA2DA  
ALDH3A2B  
ANAPC13.1

ANKRD2.S  
ARCN1A  
ARHGAP11A.2  
ARX.L  
ARX.S  
ASB12.2  
ASP  
ASTL2C  
ATG4A.S  
ATOH7.S  
ATP1A1.S  
B3GNT5.S  
B4GALT1.2  
BAF-L  
BIRC5L  
BIX1.1  
BMP2.L  
BMP7.2  
C24H11.1  
C6.2.L  
CAMK2G1  
CAR1\_PREDICTED  
CARM1P1  
CAT.1  
CAT.2  
CCN3.L  
CCNB1.2  
CCND2.L  
CCNDX  
CDCA5.S  
CELF3.L  
CFOS-A  
CLDN15.1  
CLDN6.1  
CLDN6.1.S  
CLTRN.L  
CNDP2.L  
COL25A1.2  
COMT.2  
COX5B.2  
CPEB1.L  
CPLX2L  
CRADD.1  
CRHR1.1  
CRHR1.2.S  
CRYBB2.L  
CTNNB1.L  
CYP2C8.2  
CYP4B1.2  
DCK.1  
DCK.2.L  
DES.1  
DLG1L  
DMRT1.S  
DMRT2A  
DNAJA4.1  
DNAJA4.2  
DPPA3L1

DPY-8  
DUSP11.2  
DYNLL1.S  
DYRK1A.2  
DZIP1-PS1  
EDNRB2  
EEF1A1O  
EEF2.1  
EEF2.2  
EFNA5B  
ELN2  
EN2.S  
ENPP7-L  
F35C11.2  
F35C11.3  
F47B3.1  
F49E11.7  
F54H5.3  
FAAH.2  
FABP2.S  
FCN3-A  
FOXA4  
FOXC1-A  
FOXD4L1.1  
FOXF1.L  
FOXI2.S  
FOXJ1.2  
FOXJ1.L  
FRZB2  
FSCN1B  
FUCOLECTIN.S  
FZD8.S  
GABPB1.S  
GATA4.L  
GATA4.S  
GDNFA  
GNA11A  
GNGT2.1  
GNRHR2/NMI  
GPHNB  
GRHPR.1  
GRHPR.2  
GRIK5-LIKE.1.L  
GST-37  
GTF2A1.S  
GTF2E1.2  
H1-6.L  
H2AC1.S  
HAL.1  
HBA3  
HBA-L2  
HBA-L5  
HCST.L  
HES1.S  
HES6.2  
HES7.1  
HIATL3  
HMBS.2.S

HOXB9A  
HOXD10A  
HOXD11A  
HSBP1B  
HSF2.2  
HSPH1.L  
IGF2BP3.L  
IGHV4-31  
IGLV5-48  
INKA1.S  
INVS.S  
IPO5.S  
IRF6.2  
KIT.L  
KLK1C8  
KRT12.4  
KRT61  
KRT70  
LCT.1.L  
LDLR.S  
LGALS4.1.L  
LMNB3  
LP1  
LPAR1.L  
MACROH2A2.L  
MAP3K12.S  
MAX.S  
MCHR1.1  
MCHR1.2  
MCM6.2.S  
MHC1B2  
MMP9.1.S  
MOB2.1  
MOGAT1.L  
MSMB.3  
MSTN.1  
NEUROG2.S  
NHR-265  
NIF  
NKX3-3  
NOT  
NOT.S  
NR5A2.S  
OCM4.2  
OLFR215  
OLIG4  
OLR1006  
OLR1012  
OLR1024  
OLR1096  
OLR1213  
OLR1233  
OLR1246  
OLR1302  
OLR1315  
OLR1409  
OLR1448  
OLR1492

OLR1519  
OLR1619  
OLR1653  
OLR1689  
OLR259  
OLR470  
OLR551  
OLR597  
OLR601  
OLR637  
OLR660  
OLR668  
OLR819  
OLR943  
OMP.S  
OR111-5  
OR115-10  
OR13C2  
PAR3  
PC.2  
PDHA1.S  
PDIA6.L  
PED  
PEO1  
PGQ  
PICALML  
PITPNB.2  
PKDCC.2  
POLR1D.2  
POLR2L.1  
POU3F2.S  
POU4F1.2  
POU5F3.3  
PPP1R3C.2  
PRL.1  
RAB11B.1  
RAB11B.2  
RAB11FIP4L  
RACGAP1.2  
RAD51.L  
RAMAC.L  
RAS-DVA1  
RAX.S  
RBBP4.L  
RCC1.S  
RCVRN.2  
RDH7.2  
RFLCII  
RGD1306227  
RGD1559752  
RGD1560225  
RGD1561079  
RGD1562134  
RGD1563060  
RGD1563578  
RGD1563815  
RGD1564320  
RGD1564599

RGD1564645  
RGD1565299  
RGD1565323  
RGD1565534  
RGD1566265  
RHBG.L  
RPS28P9  
RRM2.1  
RRM2.2  
RTRAF.S  
S100A10.L  
SASS6.2  
SCN12AA  
6-Sep  
SHISA1.2  
SIRT3.2  
SIX3.L  
SLC16A3.S  
SLC22A15.2  
SLC35A3.1  
SLC4A10B  
SLC5A1.1  
SLC66A2.2  
SLC6A14.2.L  
SNRNP40.L  
SOX11.S  
SOX17A  
SPDYC.L  
SSB.L  
SST.2  
ST3GAL2.1  
ST3GAL2.2  
STXBP6L  
SUMO2.L  
SURF4.2  
SYN2.L  
T10G3.4  
T2R19  
T2R29  
T2R53  
TAAR7H  
TAMALIN.L  
TAS2R124  
TBC1D20.1  
TBC1D24.1  
TDGF1.3  
TECTA.2.S  
THDL18  
TMEM150B.L  
TMEM178.2  
TOP1.2  
TRG.L  
TRHD.S  
TRH.L  
TRIM3B  
TSKU.S  
TTLL13P  
TUBB2

UGDHL  
UGDH.S  
UGT-34  
UMOD.3  
VAX2.L  
VEGT  
VELO1  
VENTX3.1  
VOM1R36  
VOM1R6  
VOM2R19  
VOM2R24  
VOM2R32  
VOM2R36  
VOM2R-PS138  
VSNL1B  
WARS1.S  
WNT11B.L  
XNF7  
YBX2.L  
ZBTB8A.1  
ZFP18  
ZFP36L2.1  
ZFP36L2.2  
ZFP36L2.2.L  
ZK1248.4  
ZK809.1  
ZNF238.2  
ZNF706L  
ZNF750.L  
ZPAX  
BOKB  
CHD4A  
FTR82  
H3F3D  
HMG6  
HMG7  
ILF3B  
LYE  
MED19B  
MTP  
OLR961-PS  
RPLP2L  
SETD1BA  
STMN2A  
GNL3LP1  
IFI211  
N-TUTCA2  
ROCK2B  
SELENOP1  
SNORD8  
SPE-6  
TRY-5  
WEE-1.3  
ABCF2B  
ACTR3BP2  
ADGRE5B.2  
ADGRF8

AP3B1A  
APOOA  
AQP-11  
ARAP1A  
ARHGEF25A  
ARHGEF28A  
ASMT2  
ASNSP1  
ASNSP4  
ATF-4  
ATG10-AS1  
ATP6V1E1A  
AURKAP1  
AVPR2AB  
BPIFCL  
C1QTNF9-AS1  
C3B.1  
CABP2B  
CACNA1C-AS2  
CACNG2A  
CASC18  
CASC22  
CBLN10  
CBLN14  
CBLN17  
CBX3B  
CCL20A.3  
CCL39.2  
CCN1L2  
CEACAMP3  
CGNB  
CHIA.6  
CHMP4BA  
CHMP4BB  
CKLF-CMTM1  
CLDN34  
CLEC-198  
CNGA2B  
COA3A  
COL14A1A  
COX8  
CRFB4  
CT47A6  
CXL34B.11  
CYP4F9P  
DACOR1  
DANT2  
DEFA8P  
DENND3B  
DICP1.16  
DNAJA2A  
DNAJB12A  
E1  
EFCAB13-DT  
EGLN1A  
ENC2  
ESYT1A  
EVI5A

EXOC3L2B  
F55G1.9  
FAM219AA  
FGF12-AS1  
FHDC4  
FIBPA  
FIP1L1B  
FLI1RS  
FTH1P27  
FTHL28  
FTHL30  
FTHL31  
FUT9B  
FZD9A  
GLCEB  
GLIS2B  
GPA33B  
GPC5-AS1  
GPC5C  
GPR22A  
GPR35.1  
GRA  
GRHL2A  
GRM1B  
GTPBP2B  
HDAC7A  
HIS-66  
HIS-8  
HRASB  
HS3ST3B1B  
HSP30E.L  
IFFO2A  
IFIT16  
IGHV1-46  
IPMKA  
IQCM  
ITPKCA  
KALRNB  
KAT7A  
KIRREL3L  
LAMP1A  
LDLRAP1B  
LGALS8-AS1  
LINC00290  
LINC00417  
LINC00463  
LINC00550  
LINC00551  
LINC00659  
LINC00683  
LINC00857  
LINC00911  
LINC01010  
LINC01048  
LINC01120  
LINC01151  
LINC01204  
LINC01277

LINC01282  
LINC01333  
LINC01348  
LINC01386  
LINC01445  
LINC01493  
LINC01497  
LINC01501  
LINC01690  
LINC01702  
LINC01727  
LINC01789  
LINC01931  
LINC02036  
LINC02086  
LINC02104  
LINC02223  
LINC02228  
LINC02302  
LINC02361  
LINC02369  
LINC02453  
LINC02519  
LINC02630  
LL22NC01-81G9.3  
LNCNEF  
LOTGIDRAFT\_154656  
LRRC38A  
LY6M7  
MAST3A  
MED-1  
MHC1ZEA  
MIF4GDB  
MIR1258  
MIR3125  
MIR3126  
MIR3151  
MIR3179-3  
MIR3919  
MIR3935  
MIR4518  
MIR4644  
MIR4646  
MIR466E  
MIR4694  
MIR4728  
MIR4747  
MIR4763  
MIR4764  
MIR548AH  
MIR6132  
MIR6739  
MIR6763  
MIR6801  
MIR6813  
MIR6824  
MIR6826  
MIR6833

MIR6894  
MIR7114  
MKK6C  
MMP25B  
MUC13A  
MUC5.1  
MXF  
MYO1EA  
MYO1HB  
MYO9AB  
NANOGP1  
NEGR1-IT1  
NLRC3L  
NLRP16  
NPIPA5  
NSPA-3  
NT5C1BB  
NUO-6  
2-Oct  
ODC1-DT  
OGNA  
OLFM2B  
ONECUTL  
OR10AC1  
OR11H7  
OR14A2  
PANX1B  
PARGA  
PARP6B  
PCBD-1  
PDGFBA  
PIMR214  
PKN1A  
PLPPR5A  
PNPLA7B  
PONZR1  
PPP1R14BB  
PPP1R14BL  
PRDM1B  
PRKCAA  
PRR5A  
PSG8-AS1  
PTP4A2B  
RAB25A  
RANBP3A  
RBB4L  
RBM8A2  
RHOUA  
RIMKLB1  
RNA5SP237  
RNA5SP265  
RNA5SP269  
RNA5SP439  
RNA5SP510  
RNU7-47P  
RNU7-63P  
RNY4P3  
ROCR

SAMD1A  
SDK2A  
SEMA4GA  
SH3GL2A  
SIM1B  
SLC16A5B  
SLC16A6A  
SLC41A2A  
SORBS2B  
SOX4B  
SPARTB  
SPINK2.1  
SSUH2.1  
STYK1B  
SWAP70A  
TBC1D10AA  
TCIMB  
TCNBB  
TDRD7A  
TMC2A  
TMEM168A  
TMEM212-IT1  
TMEM54B  
TMEM92-AS1  
TMLHE-AS1  
TMPRSS11GP  
TOPORSB  
TPBGA  
TRA-CGC3-1  
TRAF2B  
TRAV26-2  
TRBV28  
TRBV3-1  
TRPC6A  
TSSC2  
TTY17A  
TTY17C  
TUBB2A-PS2  
UGT2A5  
UGT-58  
UGT5B1  
UNM\_SA911  
VHA-16  
VWA8-AS1  
WFIKKN2A  
WIPF1B  
YWHAE2  
ZBTB20-AS2  
ZDHHC12A  
ZDHHC3A  
ZDHHC8A  
ZNF1179  
ZNF362A  
ZNF576.1  
ZNF630-AS1  
ZNF649-AS1  
ZNF977  
ZSCAN5DP

CLDN34C1  
FPR-RS4  
H2AB3  
LRRC77P  
MIR2861  
MIR3075  
MIR341  
MIR741  
OBP1A  
OLFR1022  
OLFR1367  
OLFR659  
OLFR763  
OR2F2  
SCOSPONDIN  
VMN2R10  
AQP3B  
CACYBPP2  
CIBAR1P2  
CT45A5  
DNMT1A  
FABP5P9  
FAM25E  
GOLGA8K  
KIR2DS1  
KIR2DS5  
LINC00410  
MAS1LP1  
MIR320C1  
MIR580  
MIR681  
PPIAP26  
RPS15AP10  
SSXB10  
TFDP3  
ACVR1BB  
ADIPOQA  
ANO11  
ATTB  
BAIAP2L2B  
CCNL1B  
CEST-4  
CLEC-52  
CNKSR2B  
CPLX3A  
CWO  
CYP11C1  
CYP4AA1  
CYP4AE1  
CYP4D14  
CYP4P2  
DAB1A  
DAB2IPB  
DNM3A  
DPY-13  
DPY-5  
ERFL3  
F11R.1

FAM96A  
GLCEA  
GMPPAA  
GRID2IPA  
HMBSA  
HS3ST3L  
HTR2AB  
HUG  
IGHV1-54  
IOTATRY  
KANSL1B  
KAT5A  
LECTIN-33A  
LHFPL4B  
LSD-1  
M  
MINPP1A  
MYO9AA  
NDFIP1L  
NFYBA  
NINAD  
NLGN4XA  
NPM2A  
NPTX2B  
NYAP2A  
OBST-A  
ODC2  
OLFR1161  
OLFR71  
PALD1B  
PANX1A  
PARVAA  
PCDH15A  
PGLYRP6  
PHKA1B  
PITPNBL  
PRMT8B  
RC3H1A  
R-L  
SBK3  
SCAF4A  
SDR16C5A  
SER6  
SMARCD3B  
SPOPLA  
SUG  
TBC1D3  
TMED11  
TMEM144B  
TMEM222B  
TMEM238B  
TNKSB  
TOLL-9  
TPD52L2B  
TSPAN5A  
UBE2NB  
UGT35C1  
VERM

VVL  
ABHD17AP4  
ALAS  
C20ORF181  
C3ORF56  
CASP16  
COL17A1B  
COX6B  
CTAGE7P  
CYP2A10  
CYP2J1  
DLSTP1  
DMRTC1C1  
DPPA3P2  
FAM47A  
FBXW13  
GAGE12B  
GSN-AS1  
KRTAP20-4  
LINC01620  
NFE4  
OR1K1  
OR2T34  
OR3A4P  
OR6Q1  
OR7E125P  
PRAMEF19  
RLA-DMB  
RLA-DRB1  
RPS2P35  
TESL  
VCSA2  
VOM2R73  
CSN1S2A  
HIF1AA  
MIR5099  
MIR5121  
MMP13B  
MMP17A  
RPL27AP6  
SNORD45C  
SYNA  
GJC4B  
HCFC1A  
OLFR726  
PHF20B  
RGD735065  
SLC24A4A  
CPG1  
FAM213A  
HIP14  
KAT3  
MIR1193  
MIR1298  
NLRP4C  
OLFR1120  
OLFR1158  
OLFR1406

OLFR1501  
OLFR177  
OLFR248  
OLFR270  
OLFR305  
OLFR39  
OLFR643  
OLFR734  
OLR1644  
OLR540  
RGD1306502  
RGD1560324  
RGD1561231  
RGD1562143  
RGD1563581  
RT1-O1  
SLX  
SPETEX-2H  
TPT1P8  
VMN1R29  
ACLYB  
ANKRD30BP3  
ATP5MEB  
ATP7  
ATRIP-TREX1  
BCL2L1-PS1  
BHMT-PS1  
BNIP4  
BPY2C  
C10ORF71-AS1  
C20ORF202  
C5ORF17  
C80406  
CA15P1  
CADM2-AS2  
CAND1.11  
CDH18-AS1  
CDY1B  
CPEB2-DT  
CRAT37  
CRYGM2D12  
CRYGM2D15  
CRYGM2D16  
CRYGM2D19  
CRYGM2D5  
CRYGM2D8  
CRYGM2D9  
CTR1A  
CXXC4-AS1  
CYCSP6  
D15ERTD509E  
DAAM2-AS1  
DAD1P1  
DEFB105A  
DEFB106A  
DEFB107A  
DEFB107B  
DNASE1L1L

DPPA2P3  
DUSP22A  
DUX3  
DUX4L2  
DUX4L3  
DUX4L6  
DUX4L7  
EARS2L1  
EDDM13  
EXORH  
FABP7B  
FAM30C  
FMO13  
GACAT1  
GCSAML-AS1  
GS1-279B7.1  
GUCY2GP  
HIPK1-AS1  
HMX4  
HSD3BP5  
HYAL6P  
IGHV5-78  
KCNK1A  
KCNK5B  
KDM4E  
KRT8P25  
LINC00254  
LINC00307  
LINC00330  
LINC00457  
LINC00534  
LINC00575  
LINC00587  
LINC00958  
LINC00972  
LINC00989  
LINC00993  
LINC01019  
LINC01029  
LINC01037  
LINC01039  
LINC01152  
LINC01231  
LINC01307  
LINC01324  
LINC01477  
LINC01483  
LINC01484  
LINC01492  
LINC01525  
LINC01531  
LINC01553  
LINC01568  
LINC01579  
LINC01581  
LINC01602  
LINC01752  
LINC01753

LINC01878  
LINC01883  
LINC01894  
LINC01915  
LINC01947  
LINC02042  
LINC02052  
LINC02098  
LINC02107  
LINC02162  
LINC02192  
LINC02198  
LINC02212  
LINC02236  
LINC02292  
LINC02314  
LINC02346  
LINC02376  
LINC02378  
LINC02424  
LINC02450  
LINC02476  
LINC02505  
LINC02523  
LINC02533  
LINC02567  
LINC02568  
LINC02588  
LINC02618  
LINC02627  
LINC02645  
LMO7B  
LT1  
MHC1UDA  
MIR1286  
MIR29C-2  
MIR3545  
MIR3614  
MIR3681HG  
MIR4258  
MIR4283-1  
MIR4302  
MIR450B-2  
MIR466B-3  
MIR466B-4  
MIR466C  
MIR4686  
MIR548H2  
MIR548XH2  
MIR5572  
MIR598-2  
MIR6515  
MIR6771  
MIR6825  
MIR6838  
MIR6864  
MIR7667  
MIR7705

MIR7974  
MMP24-AS1-EDEM2  
MOXD2P  
MPP5A  
MTA  
MYCNUT  
NCBP2L  
NRIP1B  
NTN1B  
OLR1102  
OLR1138  
OLR1162  
OLR119  
OLR1329  
OLR1338  
OLR1378  
OLR1388  
OLR1431  
OLR1436  
OLR1457  
OLR1470  
OLR1507  
OLR1536  
OLR1539  
OLR1555  
OLR1607  
OLR1630  
OLR165  
OLR1660  
OLR196  
OLR209  
OLR210  
OLR227  
OLR286  
OLR305  
OLR310  
OLR311  
OLR401  
OLR417  
OLR420  
OLR428  
OLR456  
OLR463  
OLR491  
OLR560  
OLR641  
OLR710  
OLR745  
OLR838  
OLR85  
OLR907  
OLR92  
OLR98  
OR4F17  
OR4F4  
OR4K14  
OR51A4  
PCDHB17P

PGAM1B  
PIAS  
PICALMA  
PISRT1  
PLBD1-AS1  
PNMA6E  
PPP1R13BA  
PRAMEF2  
PRDM2B  
PRF1.6  
PTENP1-AS  
RAB6C-AS1  
RASAL2-AS1  
RBMV1B  
RBMV3AP  
RGD1561106  
RGD1561410  
RL19  
RN7SL396P  
RPSA-PS10  
SLC34A1A  
SNORA92  
SNORD115-34  
SNORD121A  
SNORD90  
SNORD96B  
SPCS2-PS  
ST7-OT3  
SUCLG2-AS1  
TAAR3P  
TAC3B  
TAS2R104  
TMBIM7P  
TMEM72-AS1  
TNFSF10L3  
TNRC18P2  
TTY1  
TTY1B  
TTY6  
TTY9A  
TTY9B  
UCHL1-AS1  
USP12-AS1  
USP17L30  
VAV3-AS1  
VHAPPA1-2  
VIML  
VOM1R21  
VOM1R31  
VOM1R99  
VOM2R28  
WG  
XACT  
ZBTB46-AS1  
ZNF426-DT  
ZNF571-AS1  
ZNRFP2  
ZRANB2-AS1

CYP2B5  
DNAH7A  
G4  
NG3  
OLFR221  
OLR1117  
OLR179  
OLR192  
SULT6B1L  
UNCX4.1  
ZFP569  
CSTA3  
CSTD6  
H2A  
IFNA9  
MIR133  
MIR599  
PDK  
AVBD10  
DOCK9-DT  
EMILIN3A  
GLMNB  
KIAA1462  
MAGI2A  
OLFR380  
OR13D1  
PTX1  
RBM2HP  
RPRL2  
RPS4  
SSFA2  
TAX-4  
TCP10L3  
TMEM183B  
C16ORF90  
C78228  
CEROX1  
CTAG1B  
CYPT4  
D1ERTD507E  
D7ERTD128E  
D7ERTD807E  
FAM27B  
FSN  
FTHL17A  
GLIPR1L3  
HOX1  
HOXB1B  
IGK-V21  
IGKV3-1  
IGKV8-27  
ISL2A  
LINC00672  
LIPO4  
MIR6395  
MIRA  
MUCL2  
NR2F6B

NRON  
OLFR1077-PS1  
OLFR109  
OLFR1428  
OLFR1474  
OLFR965  
PLATR25  
PLATR26  
QUO  
RARA-AS1  
RBM3OS  
RBMS1P1  
RHOX1  
RHOX13  
SEPT5A  
SKINT4  
SOL  
THOC2L  
TRAV3-3  
TTY12  
UBE2L1  
VIPB  
AANAT1  
MIR467D  
PUF-8  
RGD1561551  
SPE-15  
SPE-17  
DEFA2  
HMGB3A  
ILP3  
MCP1  
SLC3A2B  
UNC-43  
ASTX6  
CBP  
DAT  
FOXD2OS  
GZME  
IGHD  
IGHV14-4  
IGHV1-47  
IGHV1-72  
IGKV1-133  
IGKV4-55  
KLRA18  
LINC00299  
LINC02603  
MAGEB5  
MK1  
MRLN  
NGS  
NLRP4B  
OLFR1213  
OLFR1245  
OLFR1453  
OLFR507  
OLR1374

OLR1768  
PIMR60  
SNORA71D  
SPIN2D  
STAI  
ZFP394  
ATP5MGL  
C78513  
FABP5L2  
P76  
PPIAL4G  
SNORD78  
TRAV9D-3  
B0207.7  
C43E11.5  
C55B7.3  
D2045.5  
DPYSL2B  
F40G12.10  
F42C5.5  
F59F5.4  
FRK-1  
GPX-1  
GST-15  
GST-2  
GST-40  
GST-9  
HEATR7B1  
HNRNPUA  
HSP-16.49  
MAP1AB  
MSP-74  
MYO5AA  
NEFMA  
OLFR1130  
OLFR1301  
OLFR320  
OLFR476  
OLR1051  
OLR1071  
OLR1090  
OLR1137  
OLR1308  
OLR1319  
OLR1396  
OLR1407  
OLR1428  
OLR1498  
OLR1742  
OLR360  
OLR378  
OLR427  
OLR44  
OLR582  
OLR613  
OLR807  
OLR811  
OLR82

OLR841  
PALM1B  
PCLOA  
PLPPR3A  
PUF60B  
RGD1562515  
RGD1563159  
RGD1563263  
RGD1564177  
RGD1564657  
ROL-8  
SEC61GL  
10-Sep  
SMIM18  
TSC22  
VOM1R33  
VOM2R18  
VOM2R4  
VSNL1A  
AF366264  
AHR2D  
AHR2G  
AMD-PS6  
CACNA2D2B  
CDC34A  
COX7A2L2  
CPEB1B  
CRYGMXL2  
CTH1  
CYP21A2-PS  
CYP2D41-PS  
D19ERTD744E  
DCTN3L1  
DLA  
DPH3B-PS  
DRBP1  
EEF1A1P15  
ESP4  
ETR1  
FBXW18  
FN1A  
FTR50  
GAS1B  
H4C18  
HA  
HCEB  
HIF1AL2  
IGK-V20  
IGKV6-32  
IGLV2-14  
IMPG2B  
KHDC1C  
KIRREL1B  
LSM14AA  
MCM6L  
MPZL2B  
MTCO1P12  
MUP-PS17

MUP-PS19  
MYH7BB  
NEWGENE\_620180  
NSD1B  
N-THGTG5  
OLFR1084  
OLFR1116  
OLFR1133  
OLFR1175  
OLFR138  
OLFR1454  
OLFR322  
OLFR328  
OLFR597  
OLFR773  
OLFR912  
OLFR981  
OM-II  
OPGA  
PIN1RT1  
PKMA  
PPP2R5EB  
PRL3D3  
RAPGEF4OS1  
RGD1307182  
RGD1310852  
RGD1561694  
RGD1562863  
RGD1564405  
RGD1565798  
RIP  
RMDN2-AS1  
RPL17-PS1  
RPL23A-PS1  
RPL31-PS8  
RUNDC3AB  
SOS  
SULT2A-PS1  
TAS2R139  
TRBV4  
TSPY26  
UGT1A9-PS  
UGT5C2  
USP17LE-PS  
V1RG10  
VIPR1-AS1  
VMN1R66  
VMN2R-PS11  
VMN2R-PS57  
ZFP970  
ZNF728  
ABLIM1A  
ACAP3B  
ADNPB  
APBB2B  
APODB  
ARHGAP12B  
ARHGEF1B

ATP8B5A  
B3GLCTA  
B4GALNT4B  
BAMBIB  
BMP2B  
CABP5B  
CAPZA1A  
CBX6A  
CCDC85CB  
CCL44  
CCSAPA  
CDC42BPAA  
CLDN11B  
CLIP1A  
CLUHA  
CNTN1B  
CREB1A  
CUX1B  
CXXC5A  
DGAT1B  
DHRS11A  
DYRK1AB  
EDNRBA  
EPHA4L  
FBXO40.1  
FNDC5B  
FYCO1A  
FYCO1B  
GAL3ST1A  
GNB5A  
GRAP2B  
GRIA1B  
GRIA4B  
H2AZ2A  
HLA2B.2  
HIPK3B  
HLFB  
HMOX2B  
IGSF5A  
KCTD9B  
KDF1A  
KIDINS220A  
KRT1-C5  
KRT94  
LHX1A  
LIPEB  
LRRC4BB  
MAP4K6  
MCH  
MCTP1A  
MRM3B  
MUL1A  
NCK1A  
NDUFAB1B  
NOL4LB  
NR4A2A  
PDE5AA  
PHF21AA

POTEM  
PPIP5K1A  
PPP1R14AB  
RNF145B  
RREB1A  
RTN2A  
SH3BP5LB  
SIX3A  
SKOR1A  
SLC18A3A  
SLC29A1A  
SLC9A6A  
SLKB  
SPAG9B  
SPPL2  
STAT1A  
SYNPO2B  
SYT14B  
TAPT1A  
TMEM41AB  
TNK2B  
TP53BP2A  
TRIM2B  
TRIM33L  
TRPM4B.2  
UBE2IB  
UBTFL  
ULK1B  
VAPAL  
WAPLB  
WNK1A  
YWHABL  
ZDHHC23A  
ZNF576.2  
ZNF710B  
ZRANB1B  
CSTD5  
IL12BA  
NAP1  
OLFR1183  
OLFR143  
OLFR1497  
OLFR1510  
OLFR17  
OLFR429  
OLFR437  
OLFR516  
OLFR651  
OLFR855  
OLR1330  
OLR1392  
RGD1304624  
RGD1561667  
RGD1564463  
TLR15  
VMN1R201  
VOM1R24  
AGFG1-PS1

ASS1P11  
C17ORF50  
C9ORF102  
CCT6A-PS7  
CCT7-PS1  
COL6A4P2  
DNAJC19-PS  
EFCAB9  
EIF6-PS1  
EPHX1L  
FABP5P2  
GAPDHP72  
GRLF1-PS1  
IGD  
IGHV1-53  
IGHV1-55  
KIR2DL5A  
KLF5-PS1  
KLRA19  
LPPOS  
MIR292B  
MIR297-1  
MIR5125  
MIR548H4  
MUP-PS3  
NAT  
OLFR1013  
OLFR1111  
OLFR1115  
OLFR1355  
OLFR1411  
OLFR203  
OLFR668  
OR2L3  
OX  
PPIDL1  
RAB5A1  
RGD1304567  
RGD1305704  
RGD1311164  
RGD1560341  
RGD1560398  
RGD1560813  
RGD1562281  
RGD1562451  
RGD1562667  
RGD1563410  
RGD1563546  
RGD1563601  
RGD1564515  
RGD1564613  
RGD1566212  
RGD1566325  
SERPINA3J  
SLC22A7-PS1  
SLC25A52  
SMS-PS1  
TCAF2C

TIMM17AL1  
UAP1L2  
UBA2-PS1  
VOM2R50  
VOM2R-PS40  
ADRA1AB  
ALPHA-EST10  
ANKRD52A  
ASB12A  
BTBD6B  
CEACAM9  
CEP170AA  
CLDN34A  
CTDNEP1A  
CYP12A4  
CYP12B2  
CYP12C1  
CYP303A1  
CYP6A17  
DEFB103A  
DMRT3A  
DRD  
EIF3HA  
EVLB  
EZRB  
FBXO30B  
FBXW16  
FLR  
GALR2B  
GIT2B  
GPC1A  
GSTD6  
GUK1A  
HML  
HOXC5A  
HYDR1  
ILLR1  
IRK1  
ITGA3A  
JHI-26  
KANTR  
LECTIN-24DB  
MAP6A  
MFSD14A2  
MTBL  
MTHL2  
NR4A2B  
NTR  
OBP57A  
PAX1B  
PIP4K2AB  
PKN1B  
PSGB1  
RBM25B  
RBPJB  
RRBP1A  
RTKN2A  
SB

SELENOW2A  
SIAH2L  
SLC35A3B  
SLC7A14A  
SLKA  
SUB1A  
SYNCRIP  
SYPL2A  
SYTL2A  
TES3-PS  
TIMM23A  
TNS2A  
TOTM  
TRPN1  
UBE2Q2L  
UGT37B1  
VOM2R-PS45  
YELLOW-F  
YP2  
YP3  
ZFP229  
ZP3C  
ZPCX  
BF2  
C15ORF56  
CHIA.1  
CTRB  
DEFB108B  
EWSAT1  
H2BW1  
IGKV1-5  
LGALS9B  
LINC00634  
MAGEB6B  
OR5L1  
PRAMEF15  
RAF  
RHGB  
RPL21P44  
RPL29P15  
SPE-10  
TINP1  
TTY13  
ARA  
BRWD1-AS2  
BTF3P12  
BUB1B-PAK6  
CAPN10-DT  
CEACAM15  
CKS1L  
COL18A1A  
CORO7-PAM16  
CRYGM1  
CRYGM3  
DTX2-PS1  
DVL1B  
EFR3BB  
EGFR-AS1

ERB2  
ESR1.L  
FAM230B  
IGKV1OR15-118  
IL8R  
KLC1B  
KRT16P6  
LIMS4  
LINC00881  
MIR1248  
MIR512  
MIR524  
MIR624  
MIR6769A  
MIR6779  
MIR876  
MMP24OS  
MMP25A  
MROH7-TTC4  
MTRNR2L10  
NBPF25P  
NF2B  
NHR-140  
NHR-47  
NHR-59  
NPTN-IT1  
OLFR131  
OLR1000  
OLR129  
OLR142  
OLR1684  
OLR204  
OLR339  
OLR414  
OR10B1P  
PABPC5-AS1  
RASGEF1BB  
RGD1559575  
RGD1561134  
RGD1561853  
RGD1563835  
RGD1563947  
RGD1565862  
RNU1-2  
SERPINA14  
SKINT8  
SNORA26  
SNORA51  
SOCS9  
SRSF6B  
STAT1-2  
STXBP3-PS  
TAX-2  
TCP11X2  
TNNI1D  
TRIM74  
TRYP  
VIG1

VMN2R94  
YPEL2B  
ZC3H11B  
ANCE  
C3ORF36  
CYCE  
PDE5  
ABU-15  
ADPGK-AS1  
ARF79F  
ASNA-1  
BORCS7-ASMT  
BSN-DT  
BTBD10A  
C14A6.8  
C16C8.14  
C32H11.9  
C35B1.5  
CLDN10L2  
CLEC-66  
CPR-5  
DPY19L2P3  
DSG2-AS1  
EGR  
F36G9.15  
F39B2.3  
F55G11.6  
F56A4.2  
FAM21A  
FBXA-2  
FBXA-217  
FLOT1B  
GAL3  
GAS5-AS1  
GCDHB  
GRNAS  
GRO1  
IGFBP7-AS1  
IRG-6  
KIAA1919  
KRTAP14L  
LINC00102  
LINC00858  
M03E7.3  
MIR1204  
MIR1282  
MIR181A1HG  
MIR1902  
MIR3661  
MIR4458HG  
MIR601  
MIR9  
MIR92A2  
MLLT10P1  
MTRNR2L3  
NAPA-AS1  
NMA  
NRP1B

NRP2A  
OLR108  
OLR1083  
OLR1087  
OLR1105  
OLR1125  
OLR127  
OLR1303  
OLR1341  
OLR1380  
OLR1397  
OLR1425  
OLR1450  
OLR1491  
OLR150  
OLR1509  
OLR1530  
OLR154  
OLR1606  
OLR1631  
OLR1726  
OLR1736  
OLR181  
OLR198  
OLR230  
OLR304  
OLR336  
OLR484  
OLR493  
OLR56  
OLR684  
OLR704  
OLR715  
OLR718  
OLR741  
OLR868  
OR102-1  
OR115-1  
PCNA-AS1  
PPT2-EGFL8  
PSN  
R09E10.2  
RAB4B-EGLN2  
RAD51L3-RFFL  
RBAK-RBAKDN  
RGD1562492  
RGD1562914  
RGD1563917  
RL15  
RPLP2P3  
RS14  
SERF2-C15ORF63  
SLC7A11-AS1  
SLCO6D1  
SMPTB  
SNAR-A1  
SNORD124  
SNORD84

SPAG5-AS1  
TALDO  
TM4SF19-DYNLT2B  
TMEM256-PLSCR3  
TNFAIP8L2B  
Y60A9.3  
ZNF559-ZNF177  
ACANB  
ACTG1P1  
AK3L2-PS  
ALS2CR11  
ANAPC1P2  
ANKRD18CP  
ANTXRLP1  
APITD1  
ARHGAP27P2  
ATP5SL  
ATXN2-AS  
BCMO1  
BET1P1  
BF  
BI-1  
BLOC1S2-PS  
BNIP3P4  
BRK  
C11ORF88  
C12ORF71  
C22ORF24  
C3C  
C76213  
CA5AP1  
CADM1B  
CALM5  
CASC19  
CD8B2  
CELF2-DT  
CES4  
CHCHD2-PS  
CHODL-AS1  
COX5BP6  
CRYGM2D10  
CT83  
CXADRP2  
CXORF21  
D4ERTD617E  
DCI  
DDX39  
DEFB104A  
DEFB128  
DEFB134  
DEFB135  
DICP3.1  
DLG1-AS1  
DLG4B  
DNAH10OS  
DNAJB8-AS1  
DPP4-DT  
DPRX

DTNBB  
DUX4L26  
EFCAB4B  
EIF2S2P2  
EMR3  
EXOC1L  
FAIM2A  
FAM123C  
FAM129C  
FAM134A  
FAM150A  
FAM150B  
FAM159A  
FAM179A  
FAM197Y2  
FAM19A4  
FAM237A  
FAM26D  
FAM46D  
FAM48B1  
FAM55A  
FAM57A  
FAM90A13P  
FBXO30-DT  
FCGR1CP  
FER1L6-AS1  
FGF1B  
FRMPD2B  
FTLP10  
GAB4  
GAGE12F  
GAGE7  
GNG5-PS  
GOLGA6D  
GOLGA8M  
GSDMC4  
GST  
GULOP  
GUSBP10  
GUSBP5  
GUSBP9  
H2BFWT  
H3P44  
HIST1H2AL  
HIST1H2AM  
HIST1H2BA  
HIST1H2BJ  
HIST1H3B  
HMGN2P47  
HSD11B1-AS1  
HSD52  
HSPC324  
IGHV1-24  
IGHV1OR15-6  
IGKV1OR-2  
IGLV3  
IL28B  
IL29

IMPDH1P10  
IQGAP  
KCNJ2A  
KCNMA1-AS2  
KRT18P33  
KRT18P34  
KRT18P41  
KRT8P3  
KRTAP10-9  
KRTAP19-6  
KRTAP25-1  
L1MD-TF17  
L1MD-TF18  
L1MD-TF5  
LECT1  
LEUTX  
LINC00028  
LINC00160  
LINC00298  
LINC00484  
LINC00494  
LINC00593  
LINC00636  
LINC00703  
LINC00710  
LINC00853  
LINC00895  
LINC00922  
LINC00928  
LINC00987  
LINC01056  
LINC01081  
LINC01090  
LINC01173  
LINC01226  
LINC01303  
LINC01480  
LINC01509  
LINC01520  
LINC01629  
LINC01630  
LINC01634  
LINC01749  
LINC01822  
LINC01845  
LINC01910  
LINC01928  
LINC01973  
LINC02006  
LINC02009  
LINC02015  
LINC02057  
LINC02141  
LINC02169  
LINC02209  
LINC02226  
LINC02347  
LINC02418

LINC02447  
LINC02478  
LINC02542  
LINC02550  
LINC02591  
LINC02609  
LINC02685  
LINC02692  
LINC02731  
LINC02802  
LINC02843  
LINC02872  
LINC02880  
LSP1P5  
MCM5.L  
METTL8P1  
MINA  
MIR105-2  
MIR1182  
MIR1250  
MIR1252  
MIR1253  
MIR1260  
MIR1283-2  
MIR1295  
MIR135C-1  
MIR1470  
MIR184-2  
MIR1906-1  
MIR1941  
MIR199A-1  
MIR2117  
MIR2185-1  
MIR2185-2  
MIR2185-3  
MIR34AHG  
MIR430A-12  
MIR430A-13  
MIR430A-14  
MIR430A-15  
MIR430A-18  
MIR430A-2  
MIR430A-3  
MIR430A-4  
MIR430A-5  
MIR430A-6  
MIR430A-8  
MIR430B-1  
MIR430B-10  
MIR430B-11  
MIR430B-12  
MIR430B-13  
MIR430B-14  
MIR430B-15  
MIR430B-16  
MIR430B-17  
MIR430B-18  
MIR430B-19

MIR430B-2  
MIR430B-3  
MIR430B-5  
MIR430B-6  
MIR430B-7  
MIR430B-8  
MIR430C-10  
MIR430C-11  
MIR430C-12  
MIR430C-13  
MIR430C-14  
MIR430C-15  
MIR430C-16  
MIR430C-17  
MIR430C-18  
MIR430C-2  
MIR430C-3  
MIR430C-4  
MIR430C-5  
MIR430C-6  
MIR430C-7  
MIR430C-8  
MIR430C-9  
MIR430I-1  
MIR430I-2  
MIR430I-3  
MIR4432HG  
MIR451  
MIR453  
MIR454A  
MIR4649  
MIR4660  
MIR5046  
MIR512-1  
MIR515-2  
MIR516A2  
MIR516B1  
MIR516B2  
MIR519A2  
MIR521-2  
MIR526A1  
MIR526A2  
MIR548F1  
MIR548I1  
MIR549  
MIR550-2  
MIR620  
MIR642  
MIR669A-11  
MIR669A-12  
MIR669P-1  
MIR669P-2  
MIR6797  
MIR680-3  
MIR7161  
MIR7-2  
MIR892A  
MIR892B

MOBK3  
MOD2  
MRPS36-PS1  
MYOSLID  
NDUFV2-AS1  
NF1P1  
NINJ2-AS1  
NPM1P9  
NRXN2B  
NTRK2B  
OLFR1024  
OLFR213  
OLFR859  
OLR1148  
OLR1292  
OR10A7  
OR116-2  
OR137-2  
OR2G3  
OR4K13  
OR4N3P  
OR52K1  
OR6V1  
OSTM1-AS1  
PAPLNB  
PAR1  
PBOV1  
PDE4DIPP1  
PHKA2-AS1  
PICSAR  
PLAC9P1  
POLRMTP1  
PPARAB  
PPP1R2P1  
PRAMENP  
PRL2  
PRNT  
PSLNR  
PURBB  
PYDC2  
RBAKDN  
RBM11  
RHOXF1-AS1  
RN7SL128P  
RNF219  
RNU6-2  
RNU6-8  
RPL23AP49  
RPL31P11  
RPL39P40  
RPL5P12  
RPL7L1P3  
RPS2P37  
SBNO2A  
SCARNA11  
SCAT1  
SELT  
SEPHS1P1

SIF1  
SLC17A6B  
SLC25A51P4  
SMCR8B  
SMILR  
SMIM9  
SNAR-A14  
SNAR-B1  
SNORD105  
SNORD113-9  
SNORD115-13  
SNORD115-17  
SNORD115-19  
SNORD115-48  
SNORD116-12  
SNORD116-17  
SNORD116-26  
SNORD119  
SNORD18C  
SPATA31A6  
SPDYE11  
SPRED2B  
SSX7  
TAAR12H  
TBC1D3P1-DHX40P1  
TGFB1B  
TMEM155  
TRIM3A  
TRIM43A  
TRIM64B  
TRMT112-PS2  
TSPY3  
TSPY4  
TTY10  
TTY19  
TUBAP13  
TUBBP5  
UBTFL1  
UGT1A2P  
XRCC6P5  
ZNF645  
ZNF767  
ACL-14  
ACOX-3  
ACS-20  
ACS-7  
ADT-1  
ALH-13  
AMT-1  
ARHGAP33OS  
ARHGEF10LB  
ASM-3  
B0272.4  
B0379.2  
BAH-1  
BGNT-1.3  
BGR-1  
BUS-19

BUS-8  
C01B10.6  
C05B5.2  
C05C10.5  
C06B3.6  
C06G1.1  
C09F9.1  
C10G8.4  
C12D5.9  
C14C6.2  
C14H10.2  
C16C8.18  
C17F3.3  
C25F9.11  
C26B9.3  
C27D6.3  
C28D4.4  
C28D4.7  
C29F3.3  
C30F8.3  
C30G7.3  
C34C6.3  
C35E7.9  
C36E6.8  
C39B5.5  
C39D10.7  
C39D10.8  
C42C1.9  
C45G9.4  
C49G7.3  
C50B6.7  
C53B7.2  
CALR3A  
CAPNS1A  
CBD-1  
CERS2B  
CEST-1.1  
CEST-12  
CEST-27  
CEST-28  
CEST-35.2  
CLCN5B  
CLEC-117  
CLEC-153  
COL-139  
COL-142  
COL-156  
COL-172  
COL-176  
COL-179  
COL-54  
COL-71  
CPR-1  
CXX1A  
CYB-2.2  
D1014.5  
D1054.10  
D1081.12

D1086.11  
D1086.17  
D1086.6  
D1086.7  
D2063.1  
DAF-22  
DHS-19  
DPY-1  
E03H12.7  
EEF1A  
ENTPD2A.2  
EPB41B  
EXL-1  
F07H5.4  
F08H9.2  
F10D11.6  
F10D2.8  
F12E12.1  
F13E9.15  
F13H8.5  
F17E9.4  
F18A11.2  
F23C8.8  
F23D12.11  
F23H12.5  
F25H5.8  
F26B1.8  
F27C1.3  
F30A10.12  
F33D4.6  
F34D10.8  
F35D2.1  
F35E8.1  
F40E3.5  
F44F1.4  
F45D11.14  
F45D11.16  
F47B8.10  
F49C12.7  
F49D11.6  
F53B1.4  
F53E10.1  
F53G12.8  
F53H4.2  
F54C8.1  
F55B11.2  
F55B11.5  
F55F8.7  
F56A11.6  
F56B3.6  
F56D6.13  
FIPR-5  
FIPR-9  
FMO-5  
FURINA  
GEI-13  
GLB-29  
GRL-10

H10E21.4  
H2AX1  
HEPHL1B  
HIST1H4I  
HOXAAS2  
HRDE-1  
HRG-1  
IGKV5-43  
K02A6.3  
K02E11.7  
K07A12.5  
K07B1.4  
K07H8.5  
K08B12.1  
K08C9.1  
K09C6.8  
K09E4.1  
K11D12.13  
KLRA13-PS  
KLRA6  
LGC-21  
LMX1BA  
LON-8  
M03F8.1  
M28.9  
MAM-3  
MAOC-1  
MBOA-1  
MEC-1  
MEX-5  
MEX-6  
MIR146B-1  
MIR2188  
MIR2189  
MIR731  
MIR936  
MIRLET7J  
MLC-7  
MLT-8  
MLT-9  
MPST-5  
MSD-1  
MSD-3  
MSP-42  
MSP-52  
MSRP-6  
MTUS1B  
MUP-4  
MYO-2  
NA  
NAA15A  
NAS-29  
NELL2B  
NEP-10  
NHR-113  
NHR-21  
NHR-264  
NHR-73

NSPD-6  
NSPD-7  
OAC-1  
OAC-25  
OLFR1308  
OLFR266  
OLFR604  
OLR1237  
PAG-3  
PALS-37  
PARGL  
PERM-2  
PERM-4  
PHAT-4  
PRL3C1  
PTR-1  
PTR-14  
PTR-18  
PUC  
PUD-1.1  
PUD-1.2  
PUD-2.1  
PUF-3  
PYCR1B  
R04B3.1  
R09E10.6  
R09E12.9  
R105.1  
R13H9.5  
RBM-3.1  
RHOUB  
RMD-4  
RNY2  
SCN1BB  
SCOCB  
SCRM-6  
SDZ-24  
SEM-2  
SKPO-1  
SKPO-2  
SLO-1  
SNF-2  
SPE-8  
SPN-4  
SPP-13  
SRW-86  
SSP-34  
SSP-35  
SSP-9  
STIM2B  
STX2A  
SWSN-9  
SWT-6  
SYCN.2  
SYNGR1B  
T05H4.8  
T06D8.10  
T06E4.10

T06E4.14  
T06E4.8  
T10B5.8  
T12B5.15  
T19C3.3  
T20D4.12  
T20F5.5  
T22B7.3  
T26C5.2  
TAS2R130  
TBA-8  
TENT5BB  
TMEM-135  
TMEM79A  
TTR-34  
TTS-2  
TWK-11  
UBXN-5  
UGT-37  
UGT-5  
ULE-2  
ULE-4  
ULE-5  
VOM2R38  
W03C9.8  
W03D2.9  
W03F8.6  
W09C3.7  
Y105E8A.27  
Y106G6A.4  
Y32G9B.1  
Y37D8A.19  
Y37F4.5  
Y38C1AB.5  
Y39A1A.2  
Y47D3A.31  
Y47D7A.15  
Y47G6A.15  
Y49E10.10  
Y49E10.29  
Y49F6B.8  
Y53F4B.25  
Y53F4B.27  
Y54G2A.10  
Y57G11B.5  
Y57G11C.52  
Y57G11C.8  
Y58A7A.3  
Y59E9AR.7  
Y62E10A.13  
Y62H9A.4  
Y65B4A.9  
Y66A7A.9  
Y6E2A.10  
ZC434.3  
ZFP738  
ZFP950  
ZK1025.3

ZK1251.5  
ZK512.8  
ZK795.2  
ZK813.1  
ZK813.2  
ZK829.3  
ZP2.6  
BAMBI-PS1  
HBAE1.3  
HBEGFA  
KIR3DX1  
M17  
RGD1359158  
SERPINB6E  
42SP50  
AHCY.L  
APLNR.S  
APOL7B  
CALB1.L  
CAMK2G2  
CELA1.1  
DEFA10  
DEFB28  
DRD-5  
FADS2B  
FASN1  
GJA8B  
HAL.2.L  
HIST1H2AE  
HIST1H3H  
HOXA9A  
IFNA12  
IGKV16-104  
IGKV3-10  
IGKV3-7  
IMP  
IRX3A  
IRX3OS  
KCNK5A  
KRT12.4.L  
KRTAP16-3  
LEC-7  
MCMDC1  
MIR6385  
MIR6990  
MIR8112  
MSP-63  
NKX2-5.S  
NLRP9C  
OLFR103  
OLFR1261  
OLFR1317  
OLFR207  
OLFR285  
OLFR403  
OLFR414  
OLFR551  
OLFR91

OLFR923  
OLR1201  
OLR1240  
OLR1293  
OLR1454  
OLR1523  
OLR16  
OLR606  
OLR652  
OLR67  
OLR737  
OLR749  
OLR769  
OLR818  
OOG2  
ORLY  
PIK3R3B  
POLR2H-PS1  
PRAMEL29  
PTX  
RGD1307554  
RGD1308601  
RGD1559532  
RGD1559574  
RGD1562569  
RGD1563157  
RGD1563222  
RGD1563667  
RGD1564324  
RGD1564937  
RGD1564999  
RGD1565332  
RHOX3A  
RNF138RT1  
RT1-CE15  
SDR16C5B  
SERPINB6D  
SKINT7  
SNCGB  
SPATA31D1B  
SPOPLB  
SSP-31  
TAAR8A  
TEDDM2  
TGIF2LX1  
TPRG  
TWSG1B  
UBE2G1B  
UGT-2  
UNC45BOS  
USP17LC  
VMN1R195  
VMN1R211  
VMN1R25  
VMN1R52  
VMN1R70  
VMN1R81  
VMN1R87

VMN2R65  
VMN2R88  
VOM2R27  
WFDC6B  
XA-1.L  
ZFP759  
ZFP992  
BK  
BRACHYURY  
CCDC85CA  
CH25HL1.1  
D2ERTD127E  
DIXDC1A  
FTHL17B  
GAS1A  
HOXB3A  
IL17A/F3  
KCTD15B  
MS4A17A.5  
OPN4A  
OR7E47P  
PBX3B  
SNORD12C  
SUV39H1B  
USP46-DT  
ZSCAN4F  
CHCR1  
CHCR2  
CHIA.2  
CYP2AC1  
H2-M10.4  
OLFR677  
TAS2R123  
UPK3BL1  
WASIR2  
ABI3BPB  
ABTB2B  
ACOT15  
AFG1LB  
ANGPTL1B  
ANK3B  
ANKRD6B  
ANTXR1C  
APLNR2  
ARHGAP21B  
ARMH2  
ARRDC1A  
ASAH1A  
ASB13A.1  
ATAD3  
ATP6AP1A  
ATP6V1E1B  
ATRNL1A  
ATRNL1B  
ATXN1B  
ATXN7L2B  
AVPR1AA  
BAS-1

BICDL2L  
BNIP1B  
BOK-AS1  
BTBD10B  
BTR04  
C17ORF107  
C1QL4L  
CAPN1B  
CAPN5A  
CASPBL  
CBX7B  
CCR12A  
CD28L  
CDC42BPAB  
CFAP97D1  
CFHL3  
CHL1A  
CHMP6B  
COBLL1B  
CORO2BA  
CRP2  
CRYBG1A  
CST14A.1  
CST14A.2  
CXCL8B.3  
CXXC5B  
CYP27A1.2  
CYP2K8  
CYP2X10.2  
DHRS13A.3  
DHS-23  
DIXDC1B  
DPY19L1L  
ECE2A  
EDIL3A  
EIF4EA  
EIF4G3A  
ELAV1  
ELOCB  
ELOVL8A  
EMILIN1A  
EPOB  
EPS8A  
EPS8L3B  
ERI3-IT1  
ESAMA  
ESPNLB  
ESYT2B  
EVA1BA  
FAM160A1A  
FBXA-46  
FBXA-60  
FGD5A  
FGD5B  
FKBP10A  
FNBP1A  
FOXO1B  
FRRS1A

FTR59  
GABRA6A  
GAD1A  
GB:BC139872  
GCSHA  
GGT1B  
GGT5B  
GIGYF1A  
GLMNA  
GLRX-10  
GPR61L  
GRB  
GRINAA  
GRM6A  
GSTM2P1  
HGFA  
HS1BP3-IT1  
IGSF5B  
INKA2-AS1  
INPP4AA  
IPMKB  
IQSEC1A  
KANK1A  
KCNH6A  
KCNJ2B  
KIF5BA  
KIFAP3B  
KLF6B  
KRT18B  
LDLRA  
LHFPL2B  
LINC00222  
LINC00900  
LINC01058  
LINC01132  
LINC01215  
LINC01351  
LINC01356  
LINC01376  
LINC01518  
LINC01592  
LINC01929  
LINC02273  
LMO7A  
LMOD2B  
LNK1-AS2  
LPR6B  
LZTS2B  
MAP1SA  
MAP4L  
MBF-1  
MCLN3B  
MICALL1A  
MIR199A1  
MIR2909  
MIR4284  
MIR4489  
MIR4748

MIR4804  
MIR6321  
MKK6A  
MMRN2A  
MOB2A  
MPEG1.1  
MYHA  
MYO18AA  
NADKA  
NAV2A  
NOTCHL  
NSPA-9  
OLR1063  
OVOL1-AS1  
PAPLNA  
PAQR5B  
PBX1B  
PCDH15B  
PDAP1B  
PIMR129  
PK  
PLCH2B  
PPM1NB  
PPP2R2AB  
PRELID1B  
PSDA  
PTK2BB  
PTPN23B  
RAB11FIP4B  
RAB1AB  
RAB5AA  
RASGRF2A  
REEP3A  
RGS3A  
RHBDF1A  
RNASET2L  
RWDD  
RXFP3.2B  
RYS2B  
SACM1LA  
SASH1A  
SC:D189  
SCPP1  
SELENOO2  
SEMA3FB  
SEMA6BB  
SH3GL3B  
SHDA  
SHRPRBCK1R  
SLC12A7A  
SLC16A5A  
SLC25A30-AS1  
SLC47A3  
SLC48A1B  
SLC6A19A.2  
SLC6A22.2  
SLC6A6B  
SLC9A3R1B

SLCO5A1A  
SMPD4P1  
SNRKA  
SOWAHAB  
SPTLC2A  
SRFB  
SSBP3A  
ST7-AS2  
TBC1D3P2  
TBR1A  
TGFB2B  
THORLNC  
THRIL  
TLCD4A  
TLR5A  
TMEM107L  
TMPOB  
TNFAIP2A  
TNKSA  
TOPORSA  
TSPEARA  
TTBK1B  
TUSC8  
UBE2D1B  
UBE2E4P  
UBE2KB  
UBL7B  
UNC119A  
Y52E8A.3  
YME1L1A  
ZK742.4  
ZNF865  
ZP3D.1  
ZP3D.2  
ANKRD20A5P  
CD9A  
CEH-14  
DOXL2  
HIGD2AL1  
IFI213  
IGHV1-69  
IRS2A  
LINC00968  
NBPF12  
OR52K3P  
TMEM176L.1  
TPI1P2  
ZFP982  
BEX6  
CATSPER2P1  
FABP5P1  
HSPB1P1  
LINC00240  
LINC01881  
MIR467B  
OR7A10  
RPL21P87  
UTS2D

ABHD17AB  
ALP4  
ATPCL  
CXCL8B.1  
CYP12A5  
CYP4D2  
CYP4G1  
CYP6A21  
CYP6W1  
DESAT1  
DIP2BA  
EIP55E  
EP300A  
FLN  
FOXG1A  
GSTD10  
HOXA2B  
HTR1AB  
LINGO4A  
LYSS  
MAST1A  
MF  
MYO61F  
OLFR464  
PPO1  
RAC3A  
REG-2  
SAM-S  
SCP2B  
SENP3B  
SLC22A7B.3  
SMAD6B  
SPETEX-2D  
SPINT1A  
SRSF10B  
STRN-MLCK  
TMCC1B  
TMEM54A  
TOTC  
TOX4A  
TRAF4B  
VSIG8B  
WT1B  
YP1  
ZDHHC16A  
CELF2-AS1  
DIAPH2-AS1  
KRTAP4-11  
LINC00474  
MIR29B  
MIR323A  
MIR571  
MTERFD1  
OR2S2  
POM121L10P  
POTEI  
SKOR2  
SPATA31E1

VOM1R90  
AK7A  
ALPK3A  
ARL15B  
ARVCFB  
ASAP2A  
BMF2  
BRINP3A.2  
CACNA1BA  
CEC3  
CFBL  
COX7A  
CTDNEP1B  
CTDSPL2B  
CYLDA  
DDHD1B  
DLX6A  
DNAJC5GA  
DUB  
EBF1A  
EEF2A.1  
EFNB3B  
EIF3S6IP  
EPHB2B  
FAM83HB  
FGF12A  
FLRT1B  
FYNA  
GALCA  
GBGT1L3  
GCDHA  
GRAMD1BA  
HPRT1L  
IGF2BP2A  
JAGN1B  
LAMB2L  
LMBRD2A  
MALT2  
MATN3B  
MTMR7B  
MYLK4A  
MYT1A  
MYT1B  
NCK2B  
NRXN3B  
OTUB1B  
PCDH7A  
PDCB  
PHB2B  
PHLDB1A  
PIP4K2CA  
POC1BL  
PPIFB  
PTDSS1B  
PVRL2L  
RCVRN3  
RHOGC  
RHOT1B

RNF11B  
RP1L1B  
RPRD2A  
SATB1A  
SCDB  
SH3BP5A  
SLC5A8L  
SMCR6  
SOGA3A  
SPI1B  
STAP2A  
SYT9B  
TCIRG1A  
TGM1L1  
THSD7AA  
TRAF2A  
TRBV21-1  
UGT5C3  
UQCRC2B  
ZIC6  
ZNRF2A  
CRYGM2D18  
IFNL1  
IGLC1  
OLFR12  
OLFR1311  
OLFR283  
OLFR368  
OLFR99  
OLR1700  
SMOK2A  
SPG4  
C17H6ORF52  
CCT6A-PS1  
CD1  
CD82A  
CLEC2DL1  
CTR1C  
CYCA  
D7WSU130E  
DEFB50  
ENTPD3-AS1  
FOXB1A  
GST-24  
HSC70-PS2  
IGHV1-2  
IGH-VX24  
IGKV4-59  
ITP  
LCN11  
ME  
MIR3120  
MKRN4  
MTNE  
MYOM1A  
N  
NCL-PS1  
NDUFV3-PS1

NEK2L1  
NSUN5P2  
OAZ1-PS  
OBOX1  
OLFR1086  
OLFR1097  
OLFR32  
OLFR5  
OLFR715  
OLR107  
OLR1077  
OLR1111  
OLR1172  
OLR120  
OLR1356  
OLR1391  
OLR1394  
OLR1399  
OLR144  
OLR1475  
OLR1516  
OLR1531  
OLR1638  
OLR1639  
OLR1682  
OLR221  
OLR434  
OLR444  
OLR50  
OLR788  
OLR862  
OLR889  
OLR921  
OLR97  
OR103-5  
OR111-8  
PEBP1-PS1  
PLA2G4CL1  
PPP1R26-AS1  
PRAMEL1  
PRAMEL7  
PRR15LA  
RBM12B1  
RBPJL2  
RGD1311744  
RGD1561715  
RGD1561777  
RGD1561795  
RGD1561796  
RGD1563049  
RGD1563482  
RGD1564400  
RGD1624210  
RPL31L2  
RPS24-PS3  
RS13  
RT1-M10-1  
TAF4A

TMPRSS3A  
TPC1808  
TRDC  
TSPAN35  
UTS1  
VOM2R15  
VOM2R51  
VOM2R60  
ZFP141  
ZFP683  
AF067063  
CYP21A1P  
F13A  
KRT18P30  
MIR1203  
MIR1268B  
MIR1273H  
MIR1285-1  
MIR2467  
MIR3144  
MIR3605  
MIR4267  
MIR4433B  
MIR4448  
MIR450B-1  
MIR466B-2  
MIR5588  
MIR6815  
MIR6852  
MIR721  
NAGLT1  
OLFR1273-PS  
OR52N4  
OR5M3  
PRL8A3  
RGD1564425  
RPL37AP8  
SNORA35  
SOX19  
TRX2  
TUBB4B-PS1  
VMN1R239-PS  
VMN1R65  
ADAM21P1  
ADGRL3-AS1  
BABAM2-AS1  
BAGE3  
BAGE4  
BARX1-DT  
BCDIN3D-AS1  
C2ORF83  
CLEC2D2  
COL6A4P1  
CSN1S2AP  
CYP4F37  
DAZ1  
DEFB105B  
DUX4L5

FABP5P3  
FOXD4L6  
HSFY1  
INHBA-AS1  
JAZF1-AS1  
KATNBL1P6  
KRTAP9-2  
KRTAP9-4  
LARGE-AS1  
LHFPL3-AS2  
LINC00237  
LINC00272  
LINC00310  
LINC00504  
LINC01012  
LINC01036  
LINC01159  
LINC01170  
LINC01250  
LINC01494  
LINC01561  
LINC01566  
LINC01586  
LINC01608  
LINC01683  
LINC01762  
LINC01924  
LINC02337  
LINC02388  
LINC02389  
LINC02487  
LINC02762  
MBD3L3  
MBD3L5  
MIR2052HG  
MIR4500HG  
MIR4700  
MYO5BP2  
NACA2  
NDST1-AS1  
OR11H1  
OR1L1  
OR1L6  
OR2AK2  
OR51G2  
OR5M9  
OR9G1  
PCDHB18P  
PCGEM1  
PMCHL1  
PRSS40A  
PTCSC2  
SEPTIN7P9  
SHLD2P1  
SLC25A51P1  
SNORA41  
SNORD108  
SNORD113-2

SNORD115-39  
SNORD31  
SNORD91A  
SPATA31D5P  
ST7-OT4  
STAU2-AS1  
SUGT1P4-STRA6LP-CCDC180  
TM4SF1-AS1  
TP53TG3B  
TRIM77  
TTY6B  
ULK4P1  
ERR  
LGALS16  
PIRA2  
RGD1309779  
SSX4  
TTX-1  
VMN2R37  
ANKRD20A1  
CART4  
CBSL  
CCT6A-PS2  
CENPBD1P1  
CHURC1-FNTB  
COL28A2A  
CYP3A40  
CYP3C2  
DUXAP8  
FAM205A2  
FAM230C  
FBXW20  
GAJ  
GATD3A.L  
HERC2P3  
IGKV3-2  
ISY1-RAB43  
KCNJ2-AS1  
MIR3135B  
MIR3620  
MIR4423  
MIR548M  
MIR579  
MIR7083  
MIR7687  
MIRLET7F-1  
MYCLP1  
NEFLB  
NHR-214  
NKX1-1  
NMDAR1  
NPIPA8  
OLFR1134  
OLFR1307  
OLFR224  
OLFR330  
OLFR372  
OLFR391

OLFR456  
OLFR469  
OLFR538  
OLFR681  
OLFR703  
OLFR787  
OLFR794  
OLR136  
OLR137  
OLR140  
OLR141  
OLR1500  
OLR1673  
OLR533  
OPN4.1  
PORA  
PPP1R3AB  
PRKAG3B  
PTGES3L-AARSD1  
RASA4B  
RGD1309106  
RGD1561381  
RGD1564148  
RIMBP3B  
RIMBP3C  
RNASE1L1  
RNU4-1  
SALL1A  
SIK1B  
SMG1P3  
SMOK3B  
SNORA2B  
SNORA7A  
SNORA81  
SNORD3B-2  
SPATA31  
SPEER8-PS1  
TRAM2-AS1  
TRPD52L3  
TUBA5  
VMN1R73  
VMN2R-PS54  
VOM2R-PS24  
ZFP948-PS1  
ZNF528-AS1  
ZSCAN4C  
ADCY6A  
AY074887  
CDC42L2  
FER-1  
GLIPR2L  
H2-Q9  
HER8A  
INSM1A  
KCTD15A  
MSX1B  
NCK2A  
PCDH1GB2

RAR  
RPS15A-PS4  
SCCPDHA.1  
ST8SIA6-AS1  
TEDDM1B  
TMX2A  
TUNAR  
ZFP600  
ZNF503-AS1  
ALPHA-EST3  
BIDA  
C16ORF95  
C18H9.6  
C49G7.12  
CALD1B  
CED-13  
CERS6-AS1  
CLEC-5  
CLIP1-AS1  
COMMD3-BMI1  
COMT-4  
CYP-31A3  
CYP4E3  
CYP4P1  
CYP6D4  
CYT-B5  
DCST1-AS1  
DEFB109A  
DRD-50  
ENO1-AS1  
F01D5.2  
F35E12.6  
F46A8.9  
FAM66A  
FBXA-163  
FGD  
FTH1P16  
FTLP2  
GNBP3  
GRD  
HAR1B  
HCG25  
HER4.5  
HOXC6A  
IQCJ-SCHIP1  
KLHL7-DT  
LINC01136  
MCTS2P  
MDY  
MIR1287  
MIR196C  
MIR3936  
MIR4271  
MIR4273  
MIR4321  
MIR4664  
MIR4737  
MIR743

MSANTD3-TMEFF1  
OAS1H  
OLFR898  
POLH-1  
POLR2J3  
PRX2540-2  
PTP-5.1  
RDL  
RGD1304694  
SAA  
SENP3-EIF4A1  
SNORA70B  
SNORD139  
SNORD76  
SST-20  
T24C4.4  
TCF3B  
TEN1-CDK3  
TRIM35-27  
UGDH-AS1  
UGT-31  
UGT-53  
USP3-AS1  
ZNF643  
C11ORF16  
CART1  
DIP2C-AS1  
GSDMC2  
IFNL2  
MIR1914  
MIR673  
NUTM2F  
OLFR360  
OLFR399  
OLR1867  
RGD1309748  
SPEER2  
TRIM35-34  
VCY  
ZNF446  
AAED1  
ABT-1  
ABU-10  
ABU-9  
ACS-10  
ACS-15  
ACS-18  
AGMO-1  
ALG-3  
ALG-4  
ASP-8  
B0205.10  
B0207.1  
B0218.7  
B0261.6  
B0280.11  
B0379.7  
BASL-1

C01G6.2  
C01G8.1  
C02B10.6  
C02F5.5  
C04F12.7  
C05C12.5  
C08F11.13  
C08F8.6  
C09B9.2  
C09B9.4  
C09D4.3  
C14C10.1  
C14C11.1  
C14F11.4  
C14F11.6  
C15C6.2  
C15H11.1  
C15H7.3  
C16A11.7  
C17B7.4  
C17F3.1  
C18E9.8  
C24D10.2  
C27B7.6  
C27D8.1  
C27D8.2  
C28C12.11  
C32E8.4  
C33F10.1  
C33F10.12  
C34D4.3  
C34E11.2  
C34G6.3  
C35E7.10  
C36H8.1  
C38C3.3  
C39H7.1  
C40H1.8  
C45B2.1  
C45G9.9  
C46E10.1  
C47A4.3  
C47E12.11  
C48B6.4  
C48E7.7  
C50F7.3  
C53D6.10  
C54D2.1  
C54G4.2  
C55C3.4  
CADPSB  
CCDC94  
CEY-2  
CEY-3  
CHT-3  
CKB-4  
CLEC-206  
CLEC-73

CLEC-79  
CLEC-87  
CLEC-88  
CNC-3  
CNP-2  
COL-101  
COL-106  
COL-119  
COL-122  
COL-20  
COL-41  
COL-60  
COL-88  
COL-96  
COMP-1  
CPG-1  
CPG-2  
CTBP-1  
CTL-3  
CYC-2.2  
CYP2V1  
D1086.10  
D2092.8  
DBPHT2  
DCT-9  
DHHC-13  
DHP-1  
DHRS-4  
DHS-2  
DNAH5L  
DOD-22  
E03H12.5  
ECH-9  
EEF1A1L2  
EGG-1  
ELO-8  
F01D5.10  
F07A5.2  
F07G6.10  
F09C12.8  
F11G11.4  
F13A7.1  
F13A7.7  
F15B9.8  
F18F11.4  
F21H7.5  
F26D2.10  
F26H11.4  
F32B4.2  
F32B6.4  
F32H2.7  
F33D11.2  
F36A4.4  
F36D1.4  
F36D3.4  
F36H12.3  
F36H12.4  
F36H1.3

F37A4.4  
F37A8.1  
F38E1.3  
F38H4.4  
F40F9.3  
F40H6.1  
F42A8.1  
F42A9.3  
F42A9.7  
F45D3.4  
F47B8.2  
F47D12.7  
F48D6.4  
F49C12.15  
F52E1.14  
F52F12.5  
F53B2.5  
F53B6.4  
F53B6.7  
F53C3.1  
F54B8.4  
F55B11.3  
F55C10.4  
F55D12.6  
F59A1.15  
F59A6.4  
FAT-5  
FBXA-105  
FGF13B  
FHL3B  
FIS-1  
GFAT-2  
GIPC-1  
GIPC-2  
GLD-1  
GLF-1  
GPD-1  
GRL-15  
GSTK-1  
H06I04.5  
H34I24.1  
HOXB6B  
HOXB8A  
HOXC1A  
HS3ST1L2  
HYAL2A  
IRLD-8  
K01H12.4  
K03H1.12  
K03H1.9  
K04G2.4  
K05B2.4  
K05C4.9  
K05F1.9  
K06A1.2  
K07A1.5  
K07A3.3  
K07H8.8

K08C9.2  
K08E7.5  
K08F4.5  
K09C6.7  
KIN-21  
KREG-1  
LAB-1  
LGC-22  
LIPL-5  
LTD-1  
M117.4  
M70.3  
MAB-7  
MIR216A-1  
MIR3615  
MIR738  
MSRP-1  
MSRP-2  
MSRP-3  
MSRP-5  
MTSS1LA  
NEP-1  
NEP-8  
NHR-11  
NHR-25  
NKB-2  
NSPA-4  
NSPD-1  
NSPD-10  
NSPD-2  
NSPD-3  
NSPD-5  
OAC-29  
OLFR1502  
OSR-1  
PARG-2  
PCK-3  
PQN-2  
PQN-31  
PQN-63  
PRKACBA  
PRSS59.2  
PTP-5.2  
PTP-5.3  
PUD-4  
PUF-5  
R03C1.1  
R08A2.2  
R10E9.2  
RGD1305807  
RHOCA  
RMD-3  
RME-2  
RNH-1.1  
ROL-1  
SCRM-8  
SLC27A1B  
SNF-4

SNF-5  
SNF-9  
SPCH-2  
SPCH-3  
SSQ-2  
SSS-2  
STH-1  
SUPS-1  
SWAP70B  
T03F6.6  
T04D3.5  
T05A7.6  
T05D4.5  
T05F1.8  
T07D3.9  
T08B6.4  
T08B6.9  
T08H10.3  
T10E9.4  
T23B3.5  
T23F6.3  
T23G11.1  
T25B2.2  
T28B8.4  
T28H11.7  
TAG-10  
TAG-344  
TBH-1  
TBX-34  
TTBK-4  
TTS-1  
TXT-4  
VRP-1  
W01B6.5  
W01B6.6  
W03D8.5  
WHT-4  
WHT-8  
WRT-1  
XNTRPC  
Y106G6H.13  
Y113G7C.1  
Y116A8C.23  
Y11D7A.3  
Y22D7AR.10  
Y37A1B.5  
Y38E10A.17  
Y39B6A.30  
Y39F10C.1  
Y39G10AR.16  
Y43F8C.5  
Y43F8C.9  
Y47D3A.13  
Y47G6A.33  
Y48B6A.5  
Y51H7C.13  
Y53F4B.11  
Y54G2A.13

Y57G7A.6  
Y59E9AL.3  
Y59E9AL.6  
Y62H9A.5  
Y65B4BR.1  
Y66D12A.11  
Y69A2AR.14  
Y69A2AR.23  
Y71G12B.3  
Y73F8A.20  
Y76B12C.4  
YWHAQB  
ZC434.8  
ZC443.3  
ZC477.7  
ZK1010.5  
ZK1225.4  
ZK154.1  
ZK265.3  
ZK354.2  
ZK354.3  
ZK354.6  
ZK354.8  
ZK512.7  
ZK546.7  
ZK596.2  
ZK616.8  
ZK858.8  
ZK892.3  
ZK945.7  
ZK970.7  
ADGRL3.1  
GAPDH-PS1  
GST-3  
HBBA2  
HPXA  
HYPM  
MEI4  
OLFR1414  
OLR1229  
OLR404  
OLR60  
RGD1565059  
VOM2R31  
ADSSL  
ANKRD2.L  
BIRC5.S  
EEF1A1O.L  
FOSL2.L  
GBX2.2.L  
GNAO1.S  
HOXC8A  
IL8L2  
LEFTY  
LRE3  
LRRC70  
MSNA  
NOT.L

NPY8BR  
PLAUA  
PLAUB  
PRL4A1  
RGD1562171  
RGD1566373  
RPT4  
RX2  
SEC22BB  
SUMO2B  
TEX49  
TGM1L4  
TLX3B  
VALOPA  
VENTX2.1.L  
WASH1  
APOAI  
CHRNA2B  
DEFB30  
FOXG1C  
GSTS5  
HMOX2-PS1  
IGKV3-20  
INAB  
MILL1  
MYHZ1.2  
MYO6B  
OLR1387  
OLR1411  
OLR1513  
OLR1515  
OLR1734  
OLR689  
OLR728  
OLR791  
PRL5A2  
RGD1359449  
RNF41L  
RPS27P29  
RT1-M1-5  
SUR-7  
TTC39D  
ZP3.1  
ZP3A.1  
ABCG2C  
AGAP10P  
ANK1A  
AQP8A.2  
ARID3A.S  
BTR22  
C3-1  
C3-2  
CAPSLA  
CCDC149B  
CEACAM13  
CES2D-PS  
CLDN5A  
COMTA

CYP1A1.S  
CYP3A6  
DHRS7CB  
DOC1  
EHBP1L1A  
EPB41L4AOS  
ETHE1.L  
FAM210AB  
FAM226B  
FBXW21  
FGD4A  
FGF10A  
GAPDH-PS2  
GEMIN7L1  
GJA12.1  
H3F3B.1  
HLA-K  
HOXC9A  
IAP2  
IFFO2B  
IGHV1-82  
KCNC3A  
LIMCH1A  
LINGO1B  
LRRC4.1  
LYGL1  
MIR146  
MIR376A2  
MIR561  
MIR6236  
MIR6240  
MIR6775  
MLPHA  
MLPHB  
MRGPRA9  
MTHFD1B  
NEWGENE\_2116  
NEWGENE\_2813  
NGFRA  
NKX6.1  
NOTUMOS  
OLFR1010  
OLFR1020  
OLFR1028  
OLFR113  
OLFR1154  
OLFR1201  
OLFR1248  
OLFR1271  
OLFR1362  
OLFR1461  
OLFR1506  
OLFR2  
OLFR211  
OLFR235  
OLFR263  
OLFR293  
OLFR298

OLFR304  
OLFR310  
OLFR376  
OLFR453  
OLFR566  
OLFR592  
OLFR593  
OLFR598  
OLFR610  
OLFR646  
OLFR653  
OLFR692  
OLFR707  
OLFR724  
OLFR727  
OLFR765  
OLFR799  
OLFR834  
OLFR867  
OLFR891  
OLFR90  
OLFR918  
OR2U1P  
OR7E18P  
PCK1.L  
PLIN6  
PLVAPA  
POSTNB  
PPAP2D  
PPP1R27A  
PRL7A2  
PTP4A2A  
RABGEF1L  
RASA1B  
RBMV2FP  
REEP3B  
RGD1561333  
RGD1561662  
RGD1562404  
RGD1563668  
RGD1563834  
RGD1564053  
RGD1564247  
RGD1564606  
RGD1597339  
RHOT1A  
RNF207B  
RPL31L4  
RPL5L1  
RPS17L  
RPS21-PS1  
RPS27A-PS1  
RXRBB  
SDK2B  
SERPINB3D  
SLC22A13B  
SLC6A11A  
SNORD16A

SNPHB  
SPSB3B  
SSXB2  
ST13P7  
STAG1B  
SULT3A2  
TCF7L1A  
TCP10A  
TFDP1B  
TMEFF1B  
TNS1A  
TPBPB  
TRIM101  
TRK-TTT3-5  
TYRP1A  
USP12A  
VMN1R15  
VMN1R174  
VMN1R178  
VMN1R200  
VMN1R215  
VMN1R220  
VMN1R23  
VMN1R230  
VMN1R49  
VMN1R59  
VMN2R34  
VPS20  
WASH  
XLR5A  
ZFP677  
ZFP983  
AAK1A  
ABLIM1B  
ABTS-1  
ACOT11A  
ACTN2B  
ACVR1BA  
ACVR2AA  
ADARB1A  
AGLB  
ANGPT2A  
ANKRD10B  
AQP10A  
ARHGAP23A  
ASB5B  
ATAD1A  
B3GNT5B  
B4GALT1L  
BAHCC1B  
BCL11AA  
BMP1B  
C9ORF92  
CA16B  
CABLES2A  
CABLES2B  
CABP5A  
CACNA1HA

CAMK1GB  
CAVIN1A  
CCL34A.4  
CD151L  
CD81B  
CERT1A  
CHADLB  
CLEC-163  
CLEC-2  
CNN3B  
COL15A1B  
COMT-3  
CREB1B  
CSDC2B  
CSGALNACT1A  
CSNK2A2A  
CTB-178M22.2  
CUL1A  
CYP-14A1  
CYP2G1P  
DAAM1A  
DNAJA3B  
EDNRAA  
EIF3JA  
EIF4G3B  
EMILIN2A  
F11R.2  
FAM20CB  
FAM20CL  
FAM245A  
FBXA-116  
FTR01  
FTR54  
FURINB  
FZR1B  
GALNT18A  
GAS7A  
GCGRB  
GJA11  
GPR155A  
GRK7B  
GSTO-2  
HBL4  
HECW2B  
HER12  
HYKK.2  
IER2B  
ITIH3B.1  
KCNAB2B  
KIF26AB  
KITB  
KITLGA  
LAMB1B  
LAMP1B  
LINC00605  
LINC00700  
LINC00892  
LINC01486

LINC01548  
LINC02103  
LMAN2LA  
LRP1BA  
LRRC58A  
MAGI1A  
MAMDC2A  
MAP3K14A  
MCPH1-AS1  
MEIS2A  
METAP2B  
MICOS10-NBL1  
MIR196A2  
MIR3188  
MIR3196  
MIR4301  
MIR4690  
MIR4800  
MMP11B  
MMP23BB  
MPEG1.2  
MS4A17A.10  
MYH7BA  
MYH7L  
MYL12.1  
MYOM1B  
NAA15B  
NDST2A  
NEKL-2  
NEXMIFB  
NFAT5A  
NIBAN1B  
NKD3  
NRBP2A  
NRG2B  
NYAP2B  
OCLNB  
OR10P1  
OSBPL10B  
OXGR1A.1  
PCP-2  
PDE4CB  
PDE5AB  
PDZK1P1  
PGA4  
PGFB  
PIK3R6A  
PIP4K2AA  
PLCD3A  
PLCD4A  
PLSCR3B  
PNP4A  
POLR2EB  
POU2F2A  
PPFIBP1B  
PPFIBP2B  
PPM1AB  
PRF1.5

PRICKLE2B  
PRKAG2A  
PRKAG2B  
PRMT10  
PROCA  
PROZB  
PSD3L  
PSMA6B  
PSME4A  
PTK7A  
PTPS-1  
PTTG1IPA  
RAB18B  
RAB3DA  
RAB5AB  
RLTGR  
RRAGCA  
SERPINF2A  
SGK2A  
SH2D4BB  
SKILA  
SLC43A3A  
SLC44A1B  
SMARCA5-AS1  
SMU1B  
SORT1B  
SOSTDC1A  
SST6  
SSUH2RS1  
ST14B  
ST6GALNAC1.1  
STAP2B  
STFA2L2  
STX11B.1  
SYNPO2LB  
SYT5A  
T19D12.3  
TAOK3A  
TCEB1  
TDP2B  
TGFB2-AS1  
THBS4B  
TIAR  
TLE3A  
TLR18  
TMEM144A  
TNRC6C2  
TSPAN18B  
TVP23C-CDRT4  
UBE2L3B  
VASNA  
VASNB  
VEGFBA  
VMO1B  
WASF3B  
ZNF1015  
ZNF341  
ANTXR2A

CES2I  
CLK4A  
CYP3A85-PS  
DMBX1A  
IGKV6-25  
LINC02878  
MIR138-2  
MIR30C  
NDR2  
NDUFA10L1  
OLFR140  
OLFR800  
OLFR807  
OLR1271  
PIRA1  
PNP2  
PPP1R2-PS9  
RGD1308750  
RGD1559909  
RGD1561154  
RGD1566134  
RNF11L1  
RPL21P68  
RT1-T18  
SEK-1  
TRNV  
ZNF527  
ZP3R  
ACCOAS  
CYP2B22  
CYP4D21  
CYP9B2  
D6ERTD527E  
EIF2S1A  
GSTD7  
GSTE7  
IGKV5-39  
MIR5119  
MIR678  
OLFR1243  
OLFR1276  
OLFR128  
OLFR338  
OLFR362  
OLFR477  
OLFR612  
OLFR617  
PBXIP1B  
PGLYRP5  
POTEKP  
PRRX1A  
PST  
RABL2  
RNF224  
SAP130A  
SNHG18  
TAS2R113  
TIE

TOTA  
VMN1R63  
VMN2R58  
ZFP784  
CDC42EP4A  
DLX5A  
EFEMP2B  
FAM182A  
MIR644A  
MIR686  
OLR875  
RGD1560455  
RPLP2-PS1  
RT1-CE7  
TTC30A2  
ZFP831  
ZFP839  
CCDC182  
DCHS1B  
DLX  
FABP1A  
FGF6A  
GUSBP3  
H2BW2  
INDO  
MINPP1B  
MIR1229  
OLR132  
OLR135  
OLR1352  
PR  
RGD1564958  
RGD1566035  
TNNI4B.3  
TRAT1  
ADAMTS9-AS2  
BA2  
BANCR  
CYP2K18  
GTF2IP4  
HEIH  
MIR4298  
MIR4732  
MIR4750  
MIR636  
OLFR1033  
OLFR308  
OLFR490  
PMS2CL  
PSG16  
SNORD64  
TRIM39-RPP21  
GPR142  
OLR1346  
ABHD11-AS1  
ABHD2B  
ALMS1P1  
ATP1A1OS

BIB  
C16C8.4  
CALML6  
CASP  
CDF-1  
CLEC-60  
F55G11.4  
GEMIN8P4  
GGT3P  
HIF1A-AS2  
IGHG4  
IL8  
LAMB1A  
LINC01569  
MEK-1  
MIR301  
NACHRALPHA1  
NCF1C  
OLR1347  
OLR157  
OLR733  
OLR736  
PA2G4P4  
PRSS40  
RGD1559482  
RGD1565498  
RPS10-NUDT3  
SLC25A25-AS1  
SNORA52  
SNORD45A  
SNORD5  
SNORD60  
SNORD94  
SNRKB  
T01D3.6  
TMEM262  
TTC3P1  
ZFP512B  
ZNF561-AS1  
ATP2A1-AS1  
ATP6V1FNB  
BAGE5  
C12ORF73  
C13ORF42  
C20ORF173  
C4ORF17  
C5ORF58  
C5ORF67  
C9ORF62  
CARD8-AS1  
CBWD6  
CCAT2  
CDY2A  
CNPY3-GNMT  
CRYZL2P  
DEFB114  
DLX6OS2  
FTH1P8

GPR158-AS1  
GUCY2EP  
HIST1H2BO  
ISOC2A  
KCNK15-AS1  
LINC00260  
LINC00448  
LINC00535  
LINC00661  
LINC01707  
LINC01754  
LINC01842  
LINC02008  
LINC02092  
LINC02167  
LINC02188  
LINC02288  
LINC02363  
LINC02511  
LINC02516  
LINC02538  
LINC02613  
LIPK  
MBD3L4  
MFSD4A-AS1  
MIR1291  
MIR1343  
MIR151B  
MIR1911  
MIR3064  
MIR3191  
MIR3194  
MIR3559  
MIR3663HG  
MIR5196  
MIR6741  
MIR6887  
MIR710  
MIR7977  
MIR880  
MIR940  
MIRLET7A-2  
MSTO2P  
NBPF6  
OLFR112  
OLFR15  
OLFR197  
OLFR847  
OR6B3  
OR8G5  
OR8J1  
OR8U8  
OR9G9  
OR9I1  
OSMR-AS1  
PARGP1  
PIN1P1  
PNMA8B

PPBPP1  
PRAMEF10  
PRH2  
PTCHD3P1  
PWAR1  
RGD1562178  
RGD1564138  
RGPD4-AS1  
RPL23AP64  
SNORA77  
SNORD114-2  
SNORD115-12  
SNORD36B  
SNORD66  
SNORD91B  
SPATA31C2  
SYT14P1  
TMEM14EP  
ULK4P2  
UPK1A-AS1  
VEGF  
ZFP862-PS  
ZNF517  
ZNF619  
ZNF99  
AAY  
ABCF2A  
ABU-1  
ACDH-5  
ACDH-8  
ACSM6  
ADGRB1B  
AKR1C5  
AMAC1  
ANAPC1P1  
ANT-1.3  
APOA1-AS  
APOOP5  
ARGFX  
ARID1AA  
ARL4CA  
ASNA1  
ATP1A1B  
AZGP1P2  
BNIP3P1  
BPIL3  
BRP44L  
BSK146  
C01G12.3  
C10ORF105  
C10ORF62  
C17H12.12  
C18G1.9  
C18H7.4  
C1ORF228  
C22ORF15  
C29F7.2  
C33F10.11

C33G8.2  
C4ORF51  
C7ORF33  
C7ORF65  
C7ORF66  
CBPA1  
CCDC155  
CCDC168  
CCDC36  
CCL15-CCL14  
CCNQP1  
CDC-48.2  
CECR1  
CGB  
CH17-340M24.3  
CHST2A  
CLEC-266  
CLEC-6  
CLEC-61  
CNGA3A  
CNN2P1  
CNN2P3  
COL11A1B  
COL-184  
COL-7  
COL-80  
COL-81  
COL-90  
COL-95  
CRB2B  
CRB3B  
CRSP8P  
CRYABB  
CRYZL2P-SEC16B  
CTAGE10P  
CTAGE11P  
CTAGE3P  
CTSA-1.2  
CXADRP3  
CYN-2  
CYP-13B1  
CYP-25A1  
CYP-25A2  
CYP2J10  
CYP-36A1  
CYP9B1  
DCAF8L1  
DCXR-DT  
DDX11-AS1  
DECR-1.1  
DHS-26  
DIPK2AB  
DM1-AS  
DNM1A  
DOK1B  
DPRXP4  
DRD4-RS  
DRD5P1

DSCAS  
DYTN  
ENPP7.1  
ENTPD1-AS1  
ERC1A  
F15D4.5  
F25E5.8  
F25F2.1  
F26F12.3  
F27C1.1  
F31E8.5  
F32A11.3  
F58D2.2  
FAM105B  
FAM109B  
FAM115C  
FAM129B  
FAM164C  
FAM21  
FAM224A  
FAM224B  
FAM47C  
FAM49B  
FAM90A20P  
FBN2B  
FILNC1  
FUNDC2P2  
GAGE10  
GAGE12J  
GDNF-AS1  
GOLGA2P6  
GPD-4  
GPER  
GPR125  
GPX1P1  
GRD-14  
GST-33  
GSTD9  
GUCA1G  
H05L14.1  
H1FOO  
HACD-1  
HANG  
HHLA1  
HIST1H2AA  
HIST1H2AI  
HIST1H2AJ  
HIVP3A  
HKR1  
HNRNPCL2  
HPYR1  
HTAS-1  
HTR3C  
ICK  
IGHV1OR21-1  
IL22B  
IRG-4  
ISCA1P1

JMJD5  
K04H4.5  
K07A1.4  
KCNJ1A.1  
KIF9-AS1  
KIR3DP1  
KRT18P23  
KRT18P68  
KRT8P36  
KRTAP19-7  
KRTAP20-3  
KRTAP22-2  
KRTAP27-1  
LDHAL6A  
LILRP2  
LINC00159  
LINC00348  
LINC00488  
LINC00626  
LINC00654  
LINC00696  
LINC00840  
LINC00865  
LINC00866  
LINC00930  
LINC01085  
LINC01107  
LINC01124  
LINC01182  
LINC01257  
LINC01285  
LINC01419  
LINC01524  
LINC01591  
LINC01609  
LINC01725  
LINC01777  
LINC01975  
LINC02022  
LINC02085  
LINC02145  
LINC02325  
LINC02535  
LINC02593  
LINC02610  
LINC02611  
LINC02860  
LINC02877  
LINCR-0003  
LINGO1A  
LIPL-1  
LIPL-2  
LPHN3  
LRRC2-AS1  
LRRC37A11P  
LRRC37A16P  
LZTS2A  
M60.7

MANEA-DT  
MEX-1  
MGRN1A  
MIBP2  
MIR1191  
MIR1195  
MIR1200  
MIR1208  
MIR1265  
MIR1297  
MIR1323  
MIR153A  
MIR329-2  
MIR3976HG  
MIR4251  
MIR517B  
MIR522  
MIR548I3  
MIR548I4  
MIR548Q  
MIR585  
MIR591  
MIR670  
MIR727  
MIR736  
MIR941-1  
MIRLET7A2  
MPST-4  
MRP  
MYADML  
NAS-20  
NBPF7  
NHEDC1  
NHR-12  
NID2A  
NIPBLA  
NKD2B  
NLP-26  
NOTUM2  
NSPD-4  
NUP62L  
NXF4  
ODC-1  
OGT-1  
OLFR1085  
OLFR1105  
OLFR1330  
OLFR1466  
OLFR192  
OLFR329  
OLFR594  
OLFR824  
OLFR95  
OLR1115  
OLR327  
OLR778  
OMT2B  
OR10AG1

OR10G3  
OR10G8  
OR10G9  
OR10H3  
OR10H4  
OR10S1  
OR11H6  
OR1B1  
OR2AE1  
OR2AG2  
OR2G2  
OR2M2  
OR2T27  
OR2T8  
OR3A2  
OR4A15  
OR4A16  
OR4B1  
OR4D9  
OR52I1  
OR56A4  
OR5A1  
OR5AC2  
OR5B21  
OR5BH1P  
OR5D16  
OR5H15  
OR5K3  
OR5T1  
OR6C3  
OR6C68  
OR6K6  
OR6M1  
OR6X1  
OR7E37P  
OR8B3  
OR8D4  
OR8K3  
OR8K5  
ORK1  
OSGEPL1-AS1  
OTOL1A  
P2RX6P  
P4HA1A  
PAPSS2B  
PCAT4  
PCDH7B  
PCMTL  
PGBP  
PGP-12  
PGP-7  
PHF2P1  
PHOX2BB  
PICART1  
PIK3CD-AS1  
PIP5K1CB  
PISD-PS2  
PLA2G16

PONZR10  
POTEA  
PP12613  
PPIAP80  
PPP1R2C  
PPP4CB  
PROX1-AS1  
PRR23C  
PRR7-AS1  
PTR-22  
PUD-3  
R05H10.1  
R07E5.15  
R10E4.7  
R155.3  
RARRES3L  
RBMY1F  
RGD1304884  
RNU1-70P  
RPL7AP34  
RPS10-PS1  
RPSAP9  
RRS1-AS1  
RSU1P2  
SAMD12-AS1  
SATB2-AS1  
SBF1P1  
SCGB1B2P  
SCTR-AS1  
SEPSECS-AS1  
SEPX1  
SH3RF3-AS1  
SHAW  
SIX3OS1  
SLC25A48-AS1  
SLC44A3-AS1  
SLMO  
SLPIL2  
SMIM21  
SMIM32  
SMZ-1  
SNAR-E  
SNORD113-5  
SNORD114-10  
SNORD114-11  
SNORD114-13  
SNORD114-14  
SNORD114-16  
SNORD114-17  
SNORD114-25  
SNORD114-27  
SNORD114-29  
SNORD114-31  
SNORD114-7  
SNORD115-14  
SNORD115-16  
SNORD115-2  
SNORD115-29

SNORD115-3  
SNORD115-41  
SNORD116-14  
SNORD116-20  
SNORD36C  
SNX18P7  
SOBPB  
SOCS5A  
SPAG9A  
SPANXN2  
SPE-26  
SPINLW1  
SSH1A  
SSQ-3  
SSX9  
STRIT1  
T03G6.1  
T06E4.9  
T08G11.2  
T21G5.1  
T22B3.3  
T23F11.2  
TAGLN3A  
TAOK2B  
TBX5-AS1  
TCEA1P2  
TENM3-AS1  
TEX36-AS1  
TEX43  
TMEM132D-AS1  
TMEM272  
TMEM85  
TMEM8A  
TOP1P1  
TPTEP2  
TRBV19  
TREML5P  
TRIM75  
TRX-3  
TSNAX-DISC1  
TSPEAR-AS1  
TSPY1  
TSPY2  
TTR-14  
TTY16  
TTY23B  
TTY4B  
UBE2D2B  
UGT-16  
UGT-33  
UGT-51  
UNC-79  
URO  
USMG5  
VAP-2  
VENTXP1  
VHLL  
VMN1R16

VMN1R231  
W01A11.1  
W03F11.4  
W09D6.4  
WHT-5  
WISP1  
WISP2  
WISP3  
WTAPP1  
XRCC6P1  
Y106G6G.4  
Y119D3B.13  
Y38C1AA.7  
Y38H8A.3  
Y40H4A.2  
Y45F10C.4  
Y58A7A.4  
Y59H11AM.1  
Y69A2AR.19  
Y71G12B.27  
Y75B8A.23  
ZFP955B  
ZK938.1  
ZNF238  
ZNF534  
ZNF716  
ZNF733P  
ZNF793-AS1  
ACTR2A  
ANOS1B  
AP1S3B  
ATP1A1A.5  
ATP8B5B  
CALCOCO1A  
CNTNAP5A  
DOKIST5  
DNAH7B  
DUX4  
EIF3EA  
FGFR1B  
GNB1B  
GTF3AA  
HDAC9B  
HIGD1A.L  
HIGD1A.S  
KMT2CB  
MACO1A  
MIR219A1  
MYOZ2A  
NDRG1A  
NT5DC4  
OLFR1036  
OLFR1170  
OLFR1280  
OLFR1341  
OLFR1532-PS1  
OLFR259  
OLFR297

OLFR530  
OLFR577  
OLFR901  
PHF23A  
PTK2AB  
PYYA  
REXO1L1P  
SELENOT1B  
SERPINH1A  
SNAP23.2  
TCNBA  
TXLNBA  
UBTD1A  
VMN1R26  
ZBTB16A  
ZNF644B  
AND4  
ATP5I  
CML  
CRSP7  
GAS-1  
GLUD1A  
HOXD4A  
MHC1UBA  
NABP1A  
NEUROG2.L  
OLFR155  
PAX3A  
PKP1B  
PLECA  
PPP1R2-PS3  
PRLR.L  
PROM  
PSX1  
RAP2C-AS1  
RGD1561897  
SIM1A  
SPAG11B  
SPAG6L  
SULF2B  
LY6AL  
MLC2  
OLFR318  
PPP2R3D  
RGD1559724  
RGD1559960  
RGD1562392  
RGD1562652  
SLC22A22  
TRBV31  
VMN1R42  
ZFP781  
ACOT17  
ADGRL1A  
ADRA1AA  
AMOTL2A  
AP2M1A  
ARF4B

ARHGEF9B  
ATP5IF1B  
B3GNT2B  
BAIAP2L1A  
C3A.3  
C55A6.6  
C8ORF89  
CANT1B  
CASP6B.1  
CBL-1  
CBLN11  
CD81A  
CDKN2A/B  
CFHL5  
CHCHD3B  
CHORDC1A  
CLEC-9  
CLN6A  
CRLF1A  
DNAJB6A  
DYNLT2  
EIF3HB  
EVI5B  
FAM102BB  
FAM9B  
GDPD3A  
GPM6AA  
GRB10A  
GST-35  
GSTA.2  
H2OE11.2  
HSD20B2  
ISP-1  
JCADA  
LINC01191  
LINC01252  
LINC02076  
MIDEASA  
MIR3470B  
MIR4668  
MIR5100  
MIR669D  
MIR691  
MT1JP  
MYLK4B  
MYLK5  
MYO18AB  
MYO7BB  
NAMPT2  
NCS1A  
NRD1A  
NUDT4A  
NUDT4B  
OR2T10  
PCOLCEB  
PCP-4  
PDZD3B  
PELATON

PRG4A  
PRKAB1A  
PTH3R  
PTPDC1B  
RAC1B  
RAC3B  
RGS5B  
RNF144AB  
RPL34-DT  
RPS6KB1A  
SH3GL1A  
SLC2A3A  
SLC2A9L1  
SLC44A5B  
SLC4A4B  
SLC6A16A  
SMARCB1A  
SORT1A  
SPI1A  
SPSB4A  
STIM1A  
THBS3B  
TIGD7  
TJP2A  
TLDC1  
TLE2B  
TMC3-AS1  
TMEM176L.3B  
TMEM26A  
TNIKB  
TRPC4APB  
TSL  
TSPAN4B  
UBL7A  
VCANA  
VN1R5  
WNK4B  
ZDHHC8B  
APL-1  
CTR1B  
CYP11B3  
KRTAP31-1  
MTND  
MYHZ2  
OLR128  
OLR1398  
OLR1401  
OLR287  
OLR569  
RGD1560028  
RPS26P35  
SMYHC1  
ATTA  
BIC  
CAVIN1B  
CCL20B  
CNP1  
CYP28A5

CYP2P9  
CYP313A1  
CYP4E2  
CYP6A23  
CYT-B5-R  
EB1  
F13A1A.1  
FKBP1C  
GOLGA2P7  
GSTE3  
ING5A  
JHE  
KLK1B1  
KLK5L  
LINC00667  
MIR1296  
MIR329  
MIR95  
MT1P3  
OLFR1151  
OLR139  
OLR183  
PKMB  
RGD1306195  
RGD1307947  
RGD1560633  
RNASEH1-AS1  
SCARNA7  
SNAI1B  
SVIL-AS1  
TIMM23B  
SCARNA9L  
ASP-14  
BEND3P3  
BOLA3-AS1  
C1GALT1C1L  
C1QTNF1-AS1  
CFL1P1  
ELO-2  
F01D5.3  
ILYS-5  
LINC00266-1  
MIR700  
MNX1-AS1  
NEBL-AS1  
PMF1-BGLAP  
PXN-AS1  
SAP30L-AS1  
SMG7-AS1  
SNHG20  
SNORD100  
SNORD16  
TLR2B  
CAVIN4A  
DEFA-RS4  
DXERTD223E  
EPB41L4A-DT  
FHL1A

GUCY2E  
IGF1OS  
ITPK1-AS1  
LIM2.3  
LINC01547  
MIR124A-1HG  
MIR690  
MIRT1  
MOSPD4  
OLFR1109  
OLFR220  
RN28S1  
RPS15A-PS6  
SLC22A7B.1  
STRA6L  
TRAV3-4  
VMN2R85  
AANAT2  
ACS-17  
AF067061  
AMY2-PS2  
ANXA3B  
APOA1BP  
ARHGAP42A  
ATP1B2A  
BCLX  
BMPR1AA  
C06A1.3  
C25A8.5  
C30G12.2  
CDH-5  
CED-11  
CHCHD8  
CLEC-70  
COL10A1A  
COL-124  
COL12A1A  
COL-143  
COL-178  
COL-181  
COX6B1-PS1  
CPT1A2B  
CSAP1  
CYP2AB1  
DACHC  
DEFB23  
DGCR11  
DLX4B  
DOD-23  
DOD-3  
ECOP  
EEVS  
EHMT1B  
EPAS1B  
ESYT1B  
ETF1B  
EXT1C  
F21H7.2

F53B2.8  
F54D1.1  
F59B1.8  
FAM205A  
FAM225A  
FAM95B1  
FAM99A  
FAR-3  
FAT1A  
FOXJ1A  
FOXR2  
GEM-4  
GLN-6  
H2AB1  
HINT1-PS1  
HMGB1-PS3  
HRG-7  
IGHG2C  
ITGA11B  
JAG1A  
K06A5.2  
KLK1B9  
MAMDC2B  
MIR548E  
MIR725  
MITFA  
MRGPRA1  
MSD-4  
MSX2A  
NDEL1B  
NEWGENE\_1306455  
NLRP1C-PS  
NNT-1  
NPIPB8  
NPM3-PS1  
OAC-14  
OLFR1045  
OLFR1079  
OLFR1094  
OLFR1141  
OLFR1188  
OLFR119  
OLFR1282  
OLFR1283  
OLFR1359  
OLFR1370  
OLFR1418  
OLFR148  
OLFR165  
OLFR25  
OLFR307  
OLFR381  
OLFR527  
OLFR655  
OLFR678  
OLFR694  
OLFR730  
OLFR772

OLFR802  
OLFR809  
OLFR860  
OLFR894  
OLFR963  
OLFR972  
OLFR995  
OLR1108  
PAPPA1  
PAPPAB  
PLDI  
PLSCR3A  
PM20D1.1  
PPIAL4D  
PPP4R1L-PS  
PTGES3P3  
RAB1B-PS1  
RAB-3  
RBM4.1  
RGD1306941  
RGD1311847  
RGD1562402  
RGD1563354  
RGD1563570  
RHOX11  
RIPK5  
RPL12-PS1  
RPL17P7  
RPL4P5  
RPL6-PS1  
RPS10L1  
RPS19L1  
RT1-DOB  
SIP1  
SIP-1  
SKINT11  
SMIM31  
SNORD116  
SNORD14A  
SNRPGP2  
SPETEX-2F  
SST1  
T09F5.10  
T22B7.7  
T27A3.5  
TAS2R117  
TAS2R120  
TAS2R121  
TAS2R134  
TBC1D3D  
TLE3B  
TNNI2A.2  
TRIM55B  
TWIST1A  
UCKL1B  
UGT1A6.S  
UGT-9  
UNC-64

VMN1R202  
VPS26  
VTRNA1-1  
Y39B6A.1  
Y40H7A.10  
Y48E1B.8  
ZFP442  
ZFP457  
ZFP526  
ZFP966  
ZK105.1  
ZK1193.2  
ZK381.2  
AZIN1A  
C11ORF58  
CD300LE  
DEFB103B  
ELT-2  
HSP26  
MYHZ1.1  
OLR1395  
OLR1413  
RS2  
RSSA  
TAAR4  
CYP18A1  
CYP6D5  
DNM1P41  
GPDH1  
GSTD3  
GSTD5  
JHEH1  
LAMB2P1  
LSP2  
MIPEPP3  
MIR103-1  
MIR1207  
MIR126A  
MIR1909  
MIR19B1  
MIR742  
OLFR1006  
POLR1HAS  
PPN  
RGD1310429  
RGD1562699  
RGD1564614  
RGD1566189  
RPS16P5  
SPANXN3  
VOM2R40  
ZFP773  
ABRAA  
ACTL10  
BPY2  
CFHL2  
CSNK1A1P1  
CYP4F30P

DAZ3  
DLGAP1-AS4  
FAM187A  
FOXD4L1  
FRG1-DT  
GJC4A  
HGO  
HIST1H2AH  
IFNA21  
INTS4P1  
ISG12(B)  
KCNQ1-AS1  
KRTAP22-1  
LIM2.2  
LINC00158  
LINC00589  
LINC00630  
LINC01841  
LINC02177  
LINC02245  
LINC02387  
LYRM4-AS1  
LYZL2  
MITFB  
NPHP3-AS1  
OR1J1  
OR2AT4  
OR4C16  
OR4F5  
OR4K15  
OR4X2  
OR6C2  
PAX1A  
PSMB9A  
PTCHD1-AS  
RGD1563812  
RGD1565611  
RHCGA  
RNU5E-1  
SCARNA8  
SEC14L6  
SEPT7A  
SNORA36A  
TCAM1P  
TEX26-AS1  
TFDP1A  
TRBV5-4  
TTC41P  
ZFP408  
ZFP952  
ZNF852  
SLC6A20B  
ABCB11B  
ACOD1LB.L  
ADRB3A  
ASAP2B  
B3GNT5A  
BACH1B

C3B.2  
CAMSAP1A  
CAVIN2A  
CBLN13  
CPEB1A  
CYP2AD3  
CYP3C4  
EGR2B  
EIF3JB  
EPB41L3B  
FTHL27  
GOT2A  
HIST1H2AC  
IGK-V28  
KIAA1549LA  
LEPB  
LIMCH1B  
LOXL1-AS1  
LY6E-DT  
MAGEB17  
MAP1LC3CL  
MCAMB  
MEV-1  
MGAT1B  
MIR1202  
MIR3195  
MIR696  
MKRN2OS.1  
MSRA-1  
MST1RA  
MXRA8B  
MYB-AS1  
NSPE-1  
NT5C2A  
OLFR74  
P38A  
PAXIP1-AS2  
PCSK5B  
PDHK-2  
PDK2B  
PKP3A  
POTEJ  
PPM1DA  
PRKCBP1L  
PROX1A  
PSMC1A  
PTGDSA  
PTPN4B  
PWAR6  
RNU5B-1  
SAT1B  
SFTPBB  
SLC19A3A  
SLC7A15  
SNORA13  
SNORA4  
SNORD116-28  
SNORD59B

SOCS2-AS1  
SOUL2  
SPAG1A  
SPINK14  
STK25A  
SYPL2B  
TAG-234  
TAS2R109  
TCF7L1B  
TDO2B  
TLR5B  
TMEM51OS1  
TRIM52-AS1  
TRPA1A  
UGT5A5  
YWHABA  
YWHABB  
ZNF587B  
ZNF629  
ZNF8  
ZNRD2-DT  
ZTE38  
AADACL2  
ABCG3L4  
ACSL1A  
CLDNI  
EIF3J1  
FAM212B  
GGT2  
GSTE9  
ICN2  
LIPM  
MAPKAPK5-AS1  
MTF-1  
NP  
PP7080  
PRKAR1AA  
SMP-30  
TEX19.1  
TEX38  
TNFSF10L  
ZNF321P  
C19ORF81  
C20ORF144  
CMAHP  
CRYBB2P1  
CTHRC1A  
FAM86C2P  
GABPB1-AS1  
IGH-6  
LINC00862  
LINC01139  
MIR297  
PA2G4A  
PEPCK  
PRDM1A  
PROSC  
PSMB8-AS1

SBDSP1  
SNORD68  
TMCC1-DT  
H1-9P  
TPMA  
AAA1  
ABI1B  
ACOX-1.5  
ACTR3-AS1  
ADCYAP1R1A  
AGXT2L1  
ALS2A  
AP-1SIGMA  
ASAP1A  
BAALC-AS2  
BACH2OS  
BANF1P2  
BMPR2B  
C11ORF40  
C12ORF40  
C15ORF54  
C1ORF146  
C1ORF185  
C1ORF229  
C1QTNF9B  
C20ORF141  
C3ORF84  
C5ORF49  
CACNB3B  
CAMKII  
CCDC26  
CCNB  
CCPG1OS  
CECR6  
CHCHD2P6  
CHIAP2  
CLEC18C  
CLEC19A  
CNTNAP5C  
CT45A6  
CTAGE15  
CTAGE6  
CYP4F35P  
D6ERTD474E  
DDX3  
DEFB119  
DOS  
DSCAMB  
DSCR9  
DYL  
ELOA-AS1  
ELOVL4A  
ELSPBP1  
ERBB4A  
F42A10.6  
FAM157B  
FAM175B  
FAM188A

FAM188B  
FAM19A1  
FAM19A2  
FAM74A3  
FAM84B  
FBXC-58  
FDX1L  
FOLT-2  
GAGE12G  
GAS6-DT  
GJB10  
GOLGA8DP  
GPR98  
GSTTP2  
H2AFV  
H2AFY2  
H2-M10.3  
HBE2  
HCG22  
HIST1H3G  
HLA-L  
HLX-AS1  
HMHB1  
HNF4A-AS1  
HSFX2  
KCNJ1A.2  
KRTAP5-8  
LACE1  
LACRT  
LCNL1  
LDB1B  
LGALS17A  
LINC00092  
LINC00336  
LINC00681  
LINC00893  
LINC00906  
LINC00934  
LINC01142  
LINC01166  
LINC01606  
LINC01697  
LINC01750  
LINC01798  
LINC02027  
LINC02091  
LINC02159  
LINC02166  
LINC02249  
LINC02402  
LINC02541  
LIPJ  
LPHN2  
LRRC37A7P  
LUNAR1  
MAPRE3A  
MESDC1  
MIATNB

MIR10D  
MIR1179  
MIR124-2  
MIR1322  
MIR135A2  
MIR1471  
MIR449B  
MIR4506  
MIR466F-2  
MIR518D  
MIR520G  
MIR596  
MIR600  
MIR602  
MIR609  
MIR655  
MIR694  
MIR878  
MIR891B  
MIR921  
MMADHC-DT  
MSNB  
NANOGNB  
NAS-12  
NBPf22P  
NEP-13  
NKX2.2A  
NPM1P35  
OLFR341  
OLFR411  
OLFR619  
OLFR710  
OLFR985  
OR108-1  
OR10H1  
OR10J6P  
OR10K2  
OR11H4  
OR1E2  
OR1F2P  
OR1J2  
OR2AG1  
OR2D2  
OR2D3  
OR2L8  
OR2M4  
OR2M5  
OR4E2  
OR4L1  
OR4N5  
OR51M1  
OR51T1  
OR52E2  
OR52R1  
OR5AK2  
OR5B2  
OR5D18  
OR5I1

OR5J2  
OR5M1  
OR6B1  
OR6B2  
OR6K2  
OR6N2  
OR6S1  
OR6W1P  
OR7A5  
OR7G2  
OR8A1  
OR8H3  
OR9A2  
ORAOV1  
PAK2A  
PANTR1  
PATE3  
PGP-6  
PHF11C  
PKN2-AS1  
PPA1A  
PPBPP2  
PPP2R5CP  
PRAMEF4  
PRR25  
PRSS59.1  
PSG21  
PSMD10P2  
PSPHP1  
PTPRG-AS1  
PWAR4  
PWARSN  
RFPL1S  
RGD1560015  
RH50  
RHCGB  
RPL13AP17  
RPL36AP37  
RPL7AP10  
RPL9P11  
RPS3AP47  
S100A7L2  
SAT2B  
SEMA3GB  
SERPINA13P  
SFRS18  
SLC8A1B  
SLC9C2  
SLFN14  
SNL  
SNORD113-1  
SNORD113-6  
SNORD114-12  
SNORD114-15  
SNORD114-22  
SNORD114-28  
SNORD115-4  
SNORD115-40

SNORD115-42  
SNORD116-15  
SNORD116-6  
SNORD12B  
SNORD56B  
SNORD83A  
SPERT  
SUPT6  
T16G1.6  
TAS2R7  
TBC1D3H  
TBX2-AS1  
TFR1B  
TMCO7  
TMEM27  
TRAV13-2  
TRAV8-5  
TRBC2  
TTY18  
TUSC5  
UGT-41  
UGT-8  
URAHF  
USP17L1  
VEZF1B  
VGLL4B  
VIT-2  
WFDC10B  
WFDC9  
WRB  
XPD  
Y51H7C.1  
ZFP551  
ZNF32-AS3  
ZNF789  
FTH1P11  
HIST1H2AK  
KLRA23  
MIR454  
MRGPRB4  
OLFR586  
OLFR870  
TCL1B4  
VMN2R121  
CHMP4BL1  
GPX  
IMPDH1B  
LIM2.4  
MHC2DAB  
RGD1305938  
RT1-CE10  
TGM2L  
THOR  
UPK3BL  
ZNF778  
BCL6AA  
FCGBPL1  
LINC01184

NBPF20  
RGD1562107  
SLX1A-SULT1A3  
SNORA57  
SNORA7B  
SNORD117  
SRGAP2B  
TMPRSS11B  
TRAPPC14  
UGT2B9\*2  
ZFP133  
BRD7P3  
GCNT4A  
HHATLB  
IFNA11  
MIR19B-1  
MIR378B  
MIR4454  
MIR664-2  
OLFR24  
OR1L4  
POU3F3A  
ZFP286A  
ZFP580  
ZFP623  
ZFP821  
AMPD3B  
AOX2  
AOX6  
AQP  
ARRDC3-AS1  
BAGE2  
BMP1A  
C11ORF97  
C19ORF71  
C9ORF163  
CAT-4  
CBLNL  
CCL19A.1  
CDRT15P1  
CEP170P1  
CLTCB  
CSRNP1B  
CYP1B  
CYP2K22  
DECAY  
DKK1B  
EIF1B-AS1  
EIF3J-DT  
F11-AS1  
FAM122C  
FAM229A  
FOXD4L3  
FOXP1B  
GABARAPA  
GOLGA6L6  
GRN2  
GS1-124K5.11

GSTT2B  
HADHAB  
HDGFRP2  
HOATZ  
IGKV1-117  
IL10RB-DT  
KIAA1429  
KRTAP5-AS1  
KRTAP6-5  
LCE3F  
LINC00847  
LINC01515  
LINC02365  
MEIOSIN  
MICALL2A  
MIG7  
MIR137HG  
MIR4453HG  
MIR5189  
MIRT2  
MRC1B  
MSL3P1  
MUP11  
MYO15  
OAZ1B  
OLFR1012  
OLFR1018  
OLFR1176  
OLFR1219  
OLFR1228  
OLFR1231  
OLFR1259  
OLFR1265  
OLFR1294  
OLFR130  
OLFR1300-PS1  
OLFR1306  
OLFR1318  
OLFR1386  
OLFR1441  
OLFR146  
OLFR1463  
OLFR178  
OLFR193  
OLFR356  
OLFR390  
OLFR491  
OLFR493  
OLFR514  
OLFR571  
OLFR66  
OLFR670  
OLFR729  
OLFR994  
OR4C13  
OR4C46  
PCDH18A  
PDCD10A

PDGFBB  
PLK2B  
PRICKLE1A  
PRL7A1  
PSMD11A  
PWP2H  
RAB39A  
RAB7L1  
RGD1302996  
RGD1305110  
RGD1305350  
RGD1306746  
RGD1310935  
RGD1311084  
RGD1359108  
RGD1560821  
RSA-14-44  
RUNX2A  
SAT1A.1  
SEC14L1P1  
SEPT9A  
SINHCAFL  
SLCO1F2  
SNORD25  
SNX9B  
SPDYE7P  
STIMATE-MUSTN1  
TAAR7D  
TAS2R102  
TAS2R115  
THBS1B  
THBS3A  
TM1  
TMEFF2B  
V1RD19  
VMN1R14  
VMN1R62  
VMN1R67  
ZDHHC25  
ZFP619  
ZFP72  
ZFP957  
ZNF815P  
NME2B.2  
OLFR175  
OLFR922  
PRR9  
RGD1564854  
RTP2  
ZFP507  
DIRC2  
DLX6OS1  
F9B  
GATA1A  
MIR153C  
MIR496A  
NPIP11  
PAPL-1

PCGF5B  
POU5F1P3  
PPP1R3CB  
RPL29P11  
RPL6P27  
CKBA  
GSTE1  
HOXC4A  
LIPOGENIN  
LRRC37A  
MAGI2-AS3  
MS4A17A.1  
POMCA  
PRICKLE2-AS3  
PRKG1A  
RNU1-4  
RNY3  
TERFA  
LINC00520  
MIBP  
MPTX1  
GCSHP3  
H60A  
IGBP1B  
MIR939  
OAS1I  
POU5F1P4  
SNORD35B  
ANXA13L  
C3A.6  
CAMK2D1  
CASP3B  
CDKN1D  
CHCHD6B  
F44E5.4  
HADHAA  
HSP-16.48  
LDB3A  
LIFRB  
LINC00545  
MIR668  
NIT-1  
NUMR-1  
PEPCK1  
PSMD4B  
PTGES3A  
PTMAA  
RDH14A  
SERPINB9P1  
SYN2A  
THRAB  
TRP53RKB  
TTN-AS1  
AMY1B  
C15ORF65  
CRY1B  
FAM90A7P  
GBP1P1

IFNA10  
LINC00540  
LINC00963  
LINC01238  
MIR1271  
MIR499A  
OLFR59  
OTX2-AS1  
PGP-1  
PPDPFA  
PROSER2-AS1  
RPL10P9  
RRN3P2  
SAXO1  
SMTNL  
SNHG19  
TENT5D  
VIT-4  
ZFP433  
ZFP708  
ADAM25  
ADH6A  
AGAP2-AS1  
AMY  
ARHGEF35  
C22ORF31  
C2ORF73  
C4ORF50  
C9ORF139  
CCDC129  
CCDC185  
CCR1L1  
CD300H  
COL4A3BP  
CPB2-AS1  
D11WSU47E  
DOC2GP  
ERBB2IP  
FAM127C  
FAM132A  
FAM195A  
FAM196B  
FAM198A  
FAM19A5  
FAM238B  
FAM26E  
FAM47B  
FAM60A  
FAM86B2  
GAPDHP23  
GRAMD2A  
GREM1A  
GRID2IPB  
H2AFJ  
H2-T9  
H60B  
HBAE3  
HBBP1

HIST1H3D  
HIST4H4  
IFIT1B  
ITGB1A  
ITGB2-AS1  
KIF26B-AS1  
KMT2CA  
KRBOX1  
KRT8P45  
KRTAP10-3  
KRTAP23-1  
LHFPL2A  
LIM2.1  
LINC00051  
LINC00167  
LINC00239  
LINC00606  
LINC00689  
LINC00908  
LINC01300  
LINC01312  
LINC01514  
LINC01622  
LINC02269  
LINC02652  
MANSC4  
MCCD1  
MCHR2-AS1  
MESDC2  
MIR1953  
MIR2114  
MIR3158-1  
MIR3189  
MIR4749  
MIR4758  
MIR765  
MIR889  
MIR891A  
MRGPRG-AS1  
MS4A4E  
MYHAS  
NBPF13P  
NXF3  
OLFR1342  
OR10C1  
OR13A1  
OR13C8  
OR2A14  
OR2A5  
OR2V2  
OR2Y1  
OR3A1  
OR51I1  
OR51L1  
OR52B6  
OR52E6  
OR52J3  
OR5B3

OR5E1P  
OR5H2  
OR5T3  
OR7C1  
OR8B2  
OR8B4  
OR8H2  
OR8K1  
OR8S1  
PBP  
PCAT29  
PCNXL2  
PIK3CD-AS2  
POU2F1B  
PRAMEF1  
PRKACBB  
PTGER4P2-CDK2AP2P2  
PTOV1-AS1  
PTPRDB  
ROCK1P1  
RPL18P13  
RPS6P25  
SBPL  
SIGLEC17P  
SIGLEC8  
SIGLECL1  
SLC12A10.2  
SLED1  
SNORA80B  
SNORD116-10  
SNORD116-23  
SNORD116-24  
SNORD116-8  
SPANXN4  
SPATA31A3  
SPCS2P4  
TAS2R3  
THRAA  
TLX1NB  
TMEM206  
TMEM220-AS1  
TMEM235  
TMEM239  
TRIM108  
USP32P1  
VMN1R84  
VTRNA1-2  
WHSC1L1  
ZNF295-AS1  
ZSCAN12P1  
ATP6V0E2-AS1  
NORAD  
RNU4ATAC  
CHIA1  
DEFAL1  
DEFB43  
GCGB  
GLRP1

HIST2H2AA3  
HNF1BB  
IFNZ  
KIF19A  
MIR27E  
MIR545  
NCAM3  
NUPR1.L  
OLFR1180  
OLFR1222  
OLFR1324  
OLFR134  
OLFR1427  
OLFR1450  
OLFR1462  
OLFR1487  
OLFR1509  
OLFR398  
OLFR49  
OLFR550  
OLFR711  
OLFR887  
OLFR888  
OLFR906  
OLFR910  
OLFR951  
PLXNB1A  
RGD1307621  
RGD1309651  
RGD1311899  
RT1-CE2  
SIRPB1A  
SVS2  
TAF1A  
THRB.S  
TNFB  
VMN1R89  
ZFP496  
ZFP566  
ACS-2  
FAM47E-STBD1  
KDM7A-DT  
LCN5  
MIR181A2HG  
SMCR5  
ATP6V1C1B  
BCKDHBL  
CTDSPLA  
GJA9-MYCBP  
ITGA6B  
MCF2L-AS1  
PRKXP1  
TSPAN13A  
VDRA  
KRT17P3  
NPIP2  
PRKAG2-AS1  
RNU6-15P

CES2J  
LINC00662  
LINC01560  
MIR704  
MNDAL  
MZT2  
OLFR1339  
PARD6G-AS1  
ZFP474  
A2M-AS1  
ATP2B1-AS1  
C19ORF53  
CTSL  
DUOX  
FBXL19-AS1  
HIST1H2BC  
KRTAP5-2  
LINC00937  
PGA3  
PRH1-PRR4  
SNORA12  
TFAP2A-AS1  
TSC22D1-AS1  
TSSK3  
ZFP59  
OACYL  
COPG2IT1  
EIF4E1C  
GSTO-1  
HSP30  
IGFBP2B  
OLFR1415  
PAX2A  
RPL21P28  
ANTIPROT1  
DEFA24  
DEFB33  
DLX1A  
DLX1AS  
EMX3  
HMGN4  
KLRI1  
LCE1H  
MIR153  
NR5A1B  
OLFR357  
OLFR470  
OLFR642  
OLFR699  
OLFR875  
OLFR883  
RGD1308544  
RPS27RT  
THRB.L  
TMCO5  
ZFP658  
ZNF316  
ACVR2B-AS1

ANP32AP1  
ANPEPA  
AQP12B  
C16ORF96  
C2CD4D-AS1  
C5ORF64  
C6ORF163  
CBY3  
CCL4L1  
CDASE  
CECR5  
CLEC2A  
CLECL1  
CTAGE1  
CYP2X7  
DEFA10P  
DPH3P1  
EGOT  
ELTD1  
ERC2-IT1  
FAM133CP  
FAM175A  
FAM19A3  
FAM238C  
FAM96B  
GH2  
GNBP2  
GRM1A  
GSDMC3  
H2AFY  
HNRNPA1P33  
KIF4B  
LINC00111  
LINC00887  
LINC01115  
LINC01361  
LINC01550  
LINC02381  
LINC02817  
LRIT3  
LYPD4  
MGAM2  
MIR103  
MIR3944  
MIR506  
MIR551A  
MIR575  
MIR641  
MKL2  
MPC1L  
MROH4  
MUM1L1  
MUTED  
NLGN2A  
OLFR1333  
OLFR1505  
OLR575  
OR14I1

OR1A1  
OR4X1  
OR5AS1  
OR5B12  
OR5P2  
OR7C2  
OR9A4  
OR9Q2  
ORAI1B  
PCAT18  
PLAC9A  
PRB4  
RAB9BP1  
RSPH3B  
SNORD115-1  
STOML3B  
THEGL  
TMEM2  
TMEM249  
WEE2-AS1  
ZNF578  
ANP32C  
CCDC18-AS1  
CDKN2B-AS1  
EXOC3-AS1  
GSEC  
IGF1RB  
OFCC1  
PSG29  
SCARNA3  
TMEM161B-AS1  
TRXR-1  
VMN1R47  
CBWD2  
KIF25-AS1  
LINC00294  
TMEM236  
TSPY26P  
ACP5B  
CALM1A  
HSPE1-MOB4  
KDRL  
MTLN  
RNY4  
SMIM17  
SODH-1  
ZNF766  
SEC24B-AS1  
TNNI2B.2  
AKR1C12L1  
ATP1A1A.3  
C4  
EPT1  
KCTD12.2  
LINC01963  
LPAL2  
MIR2137  
MIR378C

OLFR1131  
OLFR1417  
OLFR1445  
OLFR150  
OLFR231  
OLFR53  
OLFR570  
OLFR578  
OLFR620  
OLFR907  
RGD1561113  
TEDDM3  
TPH1B  
TRBC1  
USP17L5  
ZNF667-AS1  
ARRDC3A  
BLACAT1  
C10ORF143  
CLDN20  
LINC01134  
MIR291A  
PGM5-AS1  
SBF2-AS1  
ZFP422-PS  
AIM1  
AKR7L  
AMELY  
AQP4-AS1  
ARMS2  
ATP2B3B  
ATXN3L  
CCDC144NL  
CCDC149A  
CXORF58  
DEFB129  
EZHIP  
FAHD2B  
FAHD2CP  
FAM103A1  
FAM196A  
FAM84A  
FGF14-AS2  
FOXD2-AS1  
FSTL1B  
GAGE1  
GNRHR3  
GSTS3  
HIST1H3A  
IFNW1  
LINC00471  
LINC00632  
LINC00707  
LINC01141  
LKAAEAR1  
MIR129  
MIR365-1  
MIR559

MS4A12  
NCAM1A  
OLFR272  
OLR1583  
OR2T1  
OR4K1  
OR8J3  
POLR2J4  
PRR34  
PVRL3  
RFPL3  
SLC16A1-AS1  
SLC25A21-AS1  
SNAR-G2  
SPATA41  
SVS6  
TAS2R40  
TAS2R41  
TAS2R60  
TEX45  
TMEM30C  
TMSB4XP8  
USP27X-DT  
VN1R2  
ZACN  
DESMA  
PTH1A  
PURPL  
SNORA73A  
TNNT3B  
ADH  
CYP-35A3  
HIST1H2AN  
ZNF780A  
ADAM8A  
ASAP1-IT1  
HSPA4A  
LINC00648  
MIR1468  
MIR218-1  
PRP2  
TMPO-AS1  
LINC00842  
POTEG  
PTCHD3  
RBM12B2  
ZNF251  
DPPA1  
GDPD4  
NLRP4E  
OLFR1173  
OLFR168  
OLFR229  
OLFR930  
SPATA9  
RNU1-1  
ZNF503-AS2  
APTR

C15ORF40  
C21ORF62  
CASC1  
CLEC4C  
DBPB  
DNM1P46  
DRICH1  
FAM127A  
FAM64A  
GLTSCR1  
HCG4  
IQCF5  
L1CAMA  
LBHD2  
LINC00698  
LINC00886  
LINC02499  
NRAD1  
OLFR1443  
OR2C1  
OR4D2  
OR4N4  
OR7G1  
PRAMEL4  
PRSS44  
SARA  
SDCBP2-AS1  
SERF1A  
SLCO4A1-AS1  
SLFN10-PS  
SNAR-F  
STPG3  
TAAR9  
TMEM57  
TOP1P2  
WHSC1  
ZFHX4-AS1  
ZNF683  
ZNF878  
CCZ1B  
RN7SK  
ZNRD1ASP  
OLFR1039  
OLFR267  
OLFR481  
OLFR559  
TRY5  
MIR292  
NCOR1P1  
FNDC9  
ZNF718  
APELA  
ALDH  
ATP1A2A  
C8ORF88  
CPLX4  
CT45A1  
DUXAP10

FAM46C  
GRXCR2  
HMGB3P1  
IQCF6  
LINC00942  
MYBPC2B  
NPBWR1  
NXF5  
OCM2  
PARP15  
PLEKHA8P1  
PRSS33  
PRSS50  
RAMP2-AS1  
RNF133  
RPL23AP7  
SNORD116-1  
SPACA7  
ZFP651  
BMS1P1  
C16ORF46  
DEFB37  
DRAIC  
FAM153B  
GZMN  
HSF3  
IRF1B  
OLFR1323  
ZFP251  
ZFP949  
PAXIP1-DT  
CRHB  
TMEM191A  
ALMS1-IT1  
COX8H  
DFNA5  
FNDC3C1  
FOXO1A  
FRG2  
KRT3  
MS4A13  
NLRP9  
SPATA31D1D  
STMND1  
TAPT1-AS1  
UGT2A2  
ZNF284  
ZNF491  
VMAC  
ZNF214  
OLFR447  
ZFP933  
ANKRD20A2P  
ANKRD7  
C10ORF82  
C8ORF37  
CFAP157  
FOXQ1B

FRG2B  
IQCH-AS1  
LINC00894  
MHC  
NR1D4A  
NRDC  
PET117  
POM121L9P  
RSL1  
SPANXB1  
TRIM73  
KLRB1B  
MFSD14C  
SUPT7L  
TCAM1  
ZFP397  
C12ORF56  
KRTAP2-3  
LINC00115  
MIR485  
NPS  
PNLIPRP3  
SCP2D1  
SPINT4  
ZCCHC6  
ZNF625  
ZFP647  
C8ORF76  
MIR488  
MSLNL  
OLFR161  
SNTN  
ZNF501  
MIR210HG  
CARMIL2  
CHT10  
CLRN2  
ERVMER61-1  
FAM46A  
FAM46B  
HLA-DOB  
NME9  
RFPL4A  
TMUB2  
ZNF709  
AOC4P  
GTSF1L  
OLFR401  
PRR22  
RPS4Y1  
USP17LA  
ZNF599  
ZNF880  
CYP19A2  
LRRRC37BP1  
NUP210L  
PGBD2  
TRAF3IP2-AS1

ZNF547  
ZNF596  
CCDC175  
MAGEB16  
ZNF418  
CEP126  
ZNF416  
PPM1N  
FBXO27  
C5ORF24
