# Supplementary material for: Pharmacological Mechanisms Underlying the Hepatoprotective Effects of Ecliptae herba on Hepatocellular Carcinoma
Source: Evid Based Complement Alternat Med. 2021 Jul 16;2021:5591402. doi: 10.1155/2021/5591402 (PMC8302389; doi:10.1155/2021/5591402)
Supplement: Supplementary Materials — Supplementary File S1: a total of 48 chemical ingredients of EH were obtained from TCMSP. Supplementary File S2: detailed information of the targets of 6 active ingredients in EH was extracted from three databases, TCMSP, DGIDB, and SwissTargetPrediction. Supplementary File S3: detailed information on HCC-related targets was extracted from GeneCards and CTD. Supplementary File S4: detailed information on the PPI network of 52 potential therapeutic targets for HCC was obtained from the STRING platform. Supplementary File S5: topological parameters of nodes in the E-H network obtained from Cytoscape. Supplementary File S6: detailed information on GO enrichment analysis obtained from WebGestalt. Supplementary File S7: detailed information on the top 10 GO terms of the GO network in the TCGA RNASeq LIHC database through Network Topology-based Analysis obtained from WebGestalt. Supplementary File S8: detailed information on the top 20 KEGG enrichment pathways obtained from the WebGestalt. Supplementary File S9: detailed information on the C-T-P network obtained from Cytoscape. [file 5591402.f1.zip › 5591402.f1/Supplementary File S4.pdf]

[illegible]

|           |             |                          |                          |   |       |   |   |       |       |   |       |       |
|-----------|-------------|--------------------------|--------------------------|---|-------|---|---|-------|-------|---|-------|-------|
| ABC<br>G2 | CYP3<br>A4  | 9606.ENSP0<br>0000237612 | 9606.ENSP0<br>0000337915 | 0 | 0     | 0 | 0 | 0     | 0.05  | 0 | 0.713 | 0.716 |
| ABC<br>G2 | AKT1        | 9606.ENSP0<br>0000237612 | 9606.ENSP0<br>0000451828 | 0 | 0     | 0 | 0 | 0.062 | 0.056 | 0 | 0.753 | 0.763 |
| ACH<br>E  | PON<br>1    | 9606.ENSP0<br>0000303211 | 9606.ENSP0<br>0000222381 | 0 | 0     | 0 | 0 | 0.062 | 0     | 0 | 0.674 | 0.681 |
| ACH<br>E  | MPO         | 9606.ENSP0<br>0000303211 | 9606.ENSP0<br>0000225275 | 0 | 0     | 0 | 0 | 0     | 0.064 | 0 | 0.41  | 0.424 |
| ACH<br>E  | TYR         | 9606.ENSP0<br>0000303211 | 9606.ENSP0<br>0000263321 | 0 | 0     | 0 | 0 | 0     | 0     | 0 | 0.531 | 0.531 |
| ACH<br>E  | APP         | 9606.ENSP0<br>0000303211 | 9606.ENSP0<br>0000284981 | 0 | 0     | 0 | 0 | 0.091 | 0.379 | 0 | 0.73  | 0.834 |
| ACH<br>E  | F2          | 9606.ENSP0<br>0000303211 | 9606.ENSP0<br>0000308541 | 0 | 0     | 0 | 0 | 0.062 | 0.052 | 0 | 0.41  | 0.429 |
| ACH<br>E  | PTGS<br>2   | 9606.ENSP0<br>0000303211 | 9606.ENSP0<br>0000356438 | 0 | 0     | 0 | 0 | 0     | 0.064 | 0 | 0.437 | 0.451 |
| ACH<br>E  | AKT1        | 9606.ENSP0<br>0000303211 | 9606.ENSP0<br>0000451828 | 0 | 0     | 0 | 0 | 0     | 0.062 | 0 | 0.448 | 0.46  |
| ACH<br>E  | CYP3<br>A4  | 9606.ENSP0<br>0000303211 | 9606.ENSP0<br>0000337915 | 0 | 0.003 | 0 | 0 | 0     | 0     | 0 | 0.462 | 0.462 |
| AHR       | AKT1        | 9606.ENSP0<br>0000242057 | 9606.ENSP0<br>0000451828 | 0 | 0     | 0 | 0 | 0     | 0     | 0 | 0.447 | 0.447 |
| AHR       | GPR3<br>5   | 9606.ENSP0<br>0000242057 | 9606.ENSP0<br>0000411788 | 0 | 0     | 0 | 0 | 0     | 0     | 0 | 0.465 | 0.465 |
| AHR       | ESR2        | 9606.ENSP0<br>0000242057 | 9606.ENSP0<br>0000343925 | 0 | 0     | 0 | 0 | 0     | 0.05  | 0 | 0.514 | 0.519 |
| AHR       | CYP1<br>9A1 | 9606.ENSP0<br>0000242057 | 9606.ENSP0<br>0000379683 | 0 | 0     | 0 | 0 | 0     | 0     | 0 | 0.534 | 0.534 |
| AHR       | MMP<br>9    | 9606.ENSP0<br>0000242057 | 9606.ENSP0<br>0000361405 | 0 | 0     | 0 | 0 | 0     | 0     | 0 | 0.56  | 0.56  |
| AHR       | RELA        | 9606.ENSP0<br>0000242057 | 9606.ENSP0<br>0000384273 | 0 | 0     | 0 | 0 | 0     | 0.379 | 0 | 0.378 | 0.597 |

|            |            |                          |                          |       |   |   |   |       |       |     |       |       |
|------------|------------|--------------------------|--------------------------|-------|---|---|---|-------|-------|-----|-------|-------|
| AHR        | EGFR       | 9606.ENSP0<br>0000242057 | 9606.ENSP0<br>0000275493 | 0     | 0 | 0 | 0 | 0.061 | 0     | 0   | 0.635 | 0.643 |
| AHR        | PTGS<br>2  | 9606.ENSP0<br>0000242057 | 9606.ENSP0<br>0000356438 | 0     | 0 | 0 | 0 | 0.098 | 0     | 0   | 0.671 | 0.69  |
| AHR        | AR         | 9606.ENSP0<br>0000242057 | 9606.ENSP0<br>0000363822 | 0     | 0 | 0 | 0 | 0     | 0.384 | 0   | 0.589 | 0.736 |
| AHR        | CYP3<br>A4 | 9606.ENSP0<br>0000242057 | 9606.ENSP0<br>0000337915 | 0     | 0 | 0 | 0 | 0.061 | 0     | 0   | 0.783 | 0.788 |
| AHR        | NR1I<br>2  | 9606.ENSP0<br>0000242057 | 9606.ENSP0<br>0000336528 | 0     | 0 | 0 | 0 | 0.061 | 0.05  | 0   | 0.792 | 0.798 |
| AHR        | CYP1<br>A2 | 9606.ENSP0<br>0000242057 | 9606.ENSP0<br>0000342007 | 0     | 0 | 0 | 0 | 0.061 | 0     | 0   | 0.839 | 0.843 |
| AHR        | ESR1       | 9606.ENSP0<br>0000242057 | 9606.ENSP0<br>0000405330 | 0     | 0 | 0 | 0 | 0     | 0.384 | 0   | 0.826 | 0.888 |
| AHR        | CYP1<br>B1 | 9606.ENSP0<br>0000242057 | 9606.ENSP0<br>0000478561 | 0     | 0 | 0 | 0 | 0.095 | 0     | 0   | 0.939 | 0.943 |
| AHR        | CYP1<br>A1 | 9606.ENSP0<br>0000242057 | 9606.ENSP0<br>0000369050 | 0     | 0 | 0 | 0 | 0.061 | 0     | 0.9 | 0.975 | 0.997 |
| AKR<br>1B1 | EGFR       | 9606.ENSP0<br>0000285930 | 9606.ENSP0<br>0000275493 | 0     | 0 | 0 | 0 | 0.231 | 0     | 0   | 0.285 | 0.426 |
| AKR<br>1B1 | PRKC<br>B  | 9606.ENSP0<br>0000285930 | 9606.ENSP0<br>0000305355 | 0     | 0 | 0 | 0 | 0     | 0     | 0   | 0.44  | 0.44  |
| AKR<br>1B1 | PIM1       | 9606.ENSP0<br>0000285930 | 9606.ENSP0<br>0000362608 | 0     | 0 | 0 | 0 | 0     | 0     | 0   | 0.473 | 0.473 |
| AKR<br>1B1 | XDH        | 9606.ENSP0<br>0000285930 | 9606.ENSP0<br>0000368727 | 0     | 0 | 0 | 0 | 0     | 0     | 0   | 0.498 | 0.497 |
| AKR<br>1B1 | AKT1       | 9606.ENSP0<br>0000285930 | 9606.ENSP0<br>0000451828 | 0     | 0 | 0 | 0 | 0     | 0     | 0   | 0.535 | 0.535 |
| AKR<br>1B1 | PTGS<br>2  | 9606.ENSP0<br>0000285930 | 9606.ENSP0<br>0000356438 | 0     | 0 | 0 | 0 | 0.062 | 0     | 0   | 0.653 | 0.661 |
| AKR<br>1B1 | CBR1       | 9606.ENSP0<br>0000285930 | 9606.ENSP0<br>0000290349 | 0.041 | 0 | 0 | 0 | 0.063 | 0     | 0   | 0.762 | 0.768 |

|          |             |                          |                          |   |   |       |       |       |       |     |       |       |
|----------|-------------|--------------------------|--------------------------|---|---|-------|-------|-------|-------|-----|-------|-------|
| AKT<br>1 | CSN<br>K2A1 | 9606.ENSP0<br>0000451828 | 9606.ENSP0<br>0000217244 | 0 | 0 | 0.223 | 0.581 | 0.057 | 0.406 | 0   | 0.377 | 0.541 |
| AKT<br>1 | MMP<br>2    | 9606.ENSP0<br>0000451828 | 9606.ENSP0<br>0000219070 | 0 | 0 | 0     | 0     | 0.061 | 0     | 0   | 0.833 | 0.836 |
| AKT<br>1 | MPO         | 9606.ENSP0<br>0000451828 | 9606.ENSP0<br>0000225275 | 0 | 0 | 0     | 0     | 0     | 0.058 | 0   | 0.559 | 0.567 |
| AKT<br>1 | HSPB<br>1   | 9606.ENSP0<br>0000451828 | 9606.ENSP0<br>0000248553 | 0 | 0 | 0     | 0     | 0     | 0.698 | 0   | 0.864 | 0.957 |
| AKT<br>1 | TYR         | 9606.ENSP0<br>0000451828 | 9606.ENSP0<br>0000263321 | 0 | 0 | 0     | 0     | 0     | 0     | 0   | 0.485 | 0.485 |
| AKT<br>1 | EGFR        | 9606.ENSP0<br>0000451828 | 9606.ENSP0<br>0000275493 | 0 | 0 | 0     | 0.554 | 0     | 0.431 | 0   | 0.973 | 0.678 |
| AKT<br>1 | APP         | 9606.ENSP0<br>0000451828 | 9606.ENSP0<br>0000284981 | 0 | 0 | 0     | 0     | 0.063 | 0.07  | 0   | 0.62  | 0.64  |
| AKT<br>1 | BAX         | 9606.ENSP0<br>0000451828 | 9606.ENSP0<br>0000293288 | 0 | 0 | 0     | 0     | 0.061 | 0.379 | 0   | 0.581 | 0.734 |
| AKT<br>1 | MMP<br>3    | 9606.ENSP0<br>0000451828 | 9606.ENSP0<br>0000299855 | 0 | 0 | 0     | 0     | 0     | 0     | 0   | 0.585 | 0.585 |
| AKT<br>1 | INSR        | 9606.ENSP0<br>0000451828 | 9606.ENSP0<br>0000303830 | 0 | 0 | 0     | 0.559 | 0.052 | 0.288 | 0.9 | 0.677 | 0.948 |
| AKT<br>1 | PRKC<br>B   | 9606.ENSP0<br>0000451828 | 9606.ENSP0<br>0000305355 | 0 | 0 | 0     | 0.868 | 0     | 0.399 | 0   | 0.5   | 0.437 |
| AKT<br>1 | F2          | 9606.ENSP0<br>0000451828 | 9606.ENSP0<br>0000308541 | 0 | 0 | 0     | 0     | 0     | 0.05  | 0   | 0.662 | 0.665 |
| AKT<br>1 | GSK3<br>B   | 9606.ENSP0<br>0000451828 | 9606.ENSP0<br>0000324806 | 0 | 0 | 0.218 | 0.576 | 0.049 | 0.995 | 0.9 | 0.918 | 0.999 |
| AKT<br>1 | NR1I<br>2   | 9606.ENSP0<br>0000451828 | 9606.ENSP0<br>0000336528 | 0 | 0 | 0     | 0     | 0     | 0.085 | 0   | 0.408 | 0.435 |
| AKT<br>1 | ESR2        | 9606.ENSP0<br>0000451828 | 9606.ENSP0<br>0000343925 | 0 | 0 | 0     | 0     | 0     | 0.407 | 0   | 0.722 | 0.828 |
| AKT<br>1 | E2F1        | 9606.ENSP0<br>0000451828 | 9606.ENSP0<br>0000345571 | 0 | 0 | 0     | 0     | 0.091 | 0.124 | 0.9 | 0.481 | 0.953 |

|            |             |                          |                          |   |   |       |       |       |       |     |       |       |
|------------|-------------|--------------------------|--------------------------|---|---|-------|-------|-------|-------|-----|-------|-------|
| AKT<br>1   | PIK3<br>CG  | 9606.ENSP0<br>0000451828 | 9606.ENSP0<br>0000352121 | 0 | 0 | 0     | 0     | 0.063 | 0.174 | 0.9 | 0.771 | 0.979 |
| AKT<br>1   | TOP1        | 9606.ENSP0<br>0000451828 | 9606.ENSP0<br>0000354522 | 0 | 0 | 0     | 0     | 0     | 0     | 0   | 0.452 | 0.452 |
| AKT<br>1   | PARP<br>1   | 9606.ENSP0<br>0000451828 | 9606.ENSP0<br>0000355759 | 0 | 0 | 0     | 0     | 0.061 | 0.057 | 0   | 0.783 | 0.791 |
| AKT<br>1   | PTGS<br>2   | 9606.ENSP0<br>0000451828 | 9606.ENSP0<br>0000356438 | 0 | 0 | 0     | 0     | 0.062 | 0.058 | 0   | 0.848 | 0.854 |
| AKT<br>1   | MMP<br>9    | 9606.ENSP0<br>0000451828 | 9606.ENSP0<br>0000361405 | 0 | 0 | 0     | 0     | 0.061 | 0     | 0   | 0.885 | 0.887 |
| AKT<br>1   | ALO<br>X5   | 9606.ENSP0<br>0000451828 | 9606.ENSP0<br>0000363512 | 0 | 0 | 0     | 0     | 0     | 0     | 0   | 0.429 | 0.429 |
| AKT<br>1   | AR          | 9606.ENSP0<br>0000451828 | 9606.ENSP0<br>0000363822 | 0 | 0 | 0     | 0     | 0     | 0.407 | 0   | 0.89  | 0.932 |
| AKT<br>1   | CYP1<br>9A1 | 9606.ENSP0<br>0000451828 | 9606.ENSP0<br>0000379683 | 0 | 0 | 0     | 0     | 0     | 0.055 | 0   | 0.63  | 0.635 |
| AKT<br>1   | RELA        | 9606.ENSP0<br>0000451828 | 9606.ENSP0<br>0000384273 | 0 | 0 | 0     | 0     | 0.086 | 0     | 0   | 0.776 | 0.786 |
| AKT<br>1   | CHEK<br>1   | 9606.ENSP0<br>0000451828 | 9606.ENSP0<br>0000388648 | 0 | 0 | 0.241 | 0.594 | 0     | 0.436 | 0   | 0.811 | 0.652 |
| AKT<br>1   | ESR1        | 9606.ENSP0<br>0000451828 | 9606.ENSP0<br>0000405330 | 0 | 0 | 0     | 0     | 0.055 | 0.407 | 0.9 | 0.867 | 0.991 |
| AKT<br>1   | RXRA        | 9606.ENSP0<br>0000451828 | 9606.ENSP0<br>0000419692 | 0 | 0 | 0     | 0     | 0.085 | 0.085 | 0.9 | 0.271 | 0.93  |
| AKT<br>1   | PIK3<br>R1  | 9606.ENSP0<br>0000451828 | 9606.ENSP0<br>0000428056 | 0 | 0 | 0     | 0     | 0.062 | 0.447 | 0.9 | 0.835 | 0.99  |
| AKT<br>1   | HSF1        | 9606.ENSP0<br>0000451828 | 9606.ENSP0<br>0000431512 | 0 | 0 | 0     | 0     | 0.086 | 0.098 | 0   | 0.572 | 0.616 |
| AKT<br>1   | HIF1<br>A   | 9606.ENSP0<br>0000451828 | 9606.ENSP0<br>0000437955 | 0 | 0 | 0     | 0     | 0     | 0.362 | 0.9 | 0.827 | 0.988 |
| ALO<br>X15 | CYP3<br>A4  | 9606.ENSP0<br>0000458832 | 9606.ENSP0<br>0000337915 | 0 | 0 | 0     | 0     | 0     | 0     | 0.9 | 0.087 | 0.904 |

|            |            |                          |                          |       |   |       |       |       |       |     |       |       |
|------------|------------|--------------------------|--------------------------|-------|---|-------|-------|-------|-------|-----|-------|-------|
| ALO<br>X15 | CYP1<br>A2 | 9606.ENSPO<br>0000458832 | 9606.ENSPO<br>0000342007 | 0     | 0 | 0     | 0     | 0     | 0     | 0.9 | 0.057 | 0.901 |
| ALO<br>X15 | PTGS<br>1  | 9606.ENSPO<br>0000458832 | 9606.ENSPO<br>0000354612 | 0     | 0 | 0     | 0     | 0.061 | 0     | 0.9 | 0.594 | 0.958 |
| ALO<br>X15 | PTGS<br>2  | 9606.ENSPO<br>0000458832 | 9606.ENSPO<br>0000356438 | 0     | 0 | 0     | 0     | 0.061 | 0     | 0.9 | 0.601 | 0.959 |
| ALO<br>X15 | MMP<br>9   | 9606.ENSPO<br>0000458832 | 9606.ENSPO<br>0000361405 | 0     | 0 | 0     | 0     | 0.061 | 0     | 0   | 0.561 | 0.57  |
| ALO<br>X15 | ALO<br>X5  | 9606.ENSPO<br>0000458832 | 9606.ENSPO<br>0000363512 | 0     | 0 | 0.298 | 0.905 | 0.062 | 0     | 0.9 | 0.891 | 0.912 |
| ALO<br>X5  | MMP<br>2   | 9606.ENSPO<br>0000363512 | 9606.ENSPO<br>0000219070 | 0     | 0 | 0     | 0     | 0     | 0     | 0   | 0.501 | 0.501 |
| ALO<br>X5  | MPO        | 9606.ENSPO<br>0000363512 | 9606.ENSPO<br>0000225275 | 0     | 0 | 0     | 0     | 0.12  | 0     | 0   | 0.543 | 0.581 |
| ALO<br>X5  | PTGS<br>1  | 9606.ENSPO<br>0000363512 | 9606.ENSPO<br>0000354612 | 0     | 0 | 0     | 0     | 0.095 | 0     | 0.9 | 0.728 | 0.973 |
| ALO<br>X5  | PTGS<br>2  | 9606.ENSPO<br>0000363512 | 9606.ENSPO<br>0000356438 | 0     | 0 | 0     | 0     | 0.08  | 0     | 0.9 | 0.758 | 0.975 |
| ALO<br>X5  | MMP<br>9   | 9606.ENSPO<br>0000363512 | 9606.ENSPO<br>0000361405 | 0     | 0 | 0     | 0     | 0.159 | 0     | 0   | 0.423 | 0.494 |
| ALO<br>X5  | RELA       | 9606.ENSPO<br>0000363512 | 9606.ENSPO<br>0000384273 | 0     | 0 | 0     | 0     | 0     | 0.379 | 0   | 0.189 | 0.474 |
| APE<br>X1  | PTGS<br>2  | 9606.ENSPO<br>0000216714 | 9606.ENSPO<br>0000356438 | 0     | 0 | 0     | 0     | 0     | 0     | 0   | 0.492 | 0.492 |
| APE<br>X1  | CHEK<br>1  | 9606.ENSPO<br>0000216714 | 9606.ENSPO<br>0000388648 | 0     | 0 | 0     | 0     | 0.063 | 0     | 0   | 0.498 | 0.51  |
| APE<br>X1  | TOP2<br>A  | 9606.ENSPO<br>0000216714 | 9606.ENSPO<br>0000411532 | 0.129 | 0 | 0     | 0     | 0.098 | 0     | 0   | 0.489 | 0.564 |
| APE<br>X1  | TOP1       | 9606.ENSPO<br>0000216714 | 9606.ENSPO<br>0000354522 | 0     | 0 | 0     | 0     | 0.08  | 0     | 0   | 0.549 | 0.568 |
| APE<br>X1  | HIF1<br>A  | 9606.ENSPO<br>0000216714 | 9606.ENSPO<br>0000437955 | 0     | 0 | 0     | 0     | 0     | 0.294 | 0   | 0.617 | 0.718 |

|           |             |                          |                          |   |   |   |   |       |       |      |       |       |
|-----------|-------------|--------------------------|--------------------------|---|---|---|---|-------|-------|------|-------|-------|
| APE<br>X1 | CSN<br>K2A1 | 9606.ENSPO<br>0000216714 | 9606.ENSPO<br>0000217244 | 0 | 0 | 0 | 0 | 0.107 | 0.379 | 0    | 0.572 | 0.742 |
| APE<br>X1 | PARP<br>1   | 9606.ENSPO<br>0000216714 | 9606.ENSPO<br>0000355759 | 0 | 0 | 0 | 0 | 0.118 | 0     | 0.9  | 0.8   | 0.98  |
| APP       | PON<br>1    | 9606.ENSPO<br>0000284981 | 9606.ENSPO<br>0000222381 | 0 | 0 | 0 | 0 | 0     | 0     | 0.72 | 0.322 | 0.802 |
| APP       | EGFR        | 9606.ENSPO<br>0000284981 | 9606.ENSPO<br>0000275493 | 0 | 0 | 0 | 0 | 0.146 | 0.393 | 0    | 0.503 | 0.72  |
| APP       | ESR1        | 9606.ENSPO<br>0000284981 | 9606.ENSPO<br>0000405330 | 0 | 0 | 0 | 0 | 0     | 0     | 0    | 0.44  | 0.44  |
| APP       | PRSS<br>1   | 9606.ENSPO<br>0000284981 | 9606.ENSPO<br>0000308720 | 0 | 0 | 0 | 0 | 0     | 0.319 | 0    | 0.231 | 0.453 |
| APP       | MMP<br>9    | 9606.ENSPO<br>0000284981 | 9606.ENSPO<br>0000361405 | 0 | 0 | 0 | 0 | 0.06  | 0     | 0    | 0.474 | 0.485 |
| APP       | PTGS<br>2   | 9606.ENSPO<br>0000284981 | 9606.ENSPO<br>0000356438 | 0 | 0 | 0 | 0 | 0.061 | 0.379 | 0    | 0.454 | 0.654 |
| APP       | GSK3<br>B   | 9606.ENSPO<br>0000284981 | 9606.ENSPO<br>0000324806 | 0 | 0 | 0 | 0 | 0.057 | 0.397 | 0    | 0.748 | 0.845 |
| APP       | PIK3<br>R1  | 9606.ENSPO<br>0000284981 | 9606.ENSPO<br>0000428056 | 0 | 0 | 0 | 0 | 0     | 0     | 0.9  | 0.19  | 0.915 |
| APP       | RELA        | 9606.ENSPO<br>0000284981 | 9606.ENSPO<br>0000384273 | 0 | 0 | 0 | 0 | 0     | 0     | 0.9  | 0.408 | 0.938 |
| APP       | F2          | 9606.ENSPO<br>0000284981 | 9606.ENSPO<br>0000308541 | 0 | 0 | 0 | 0 | 0     | 0.132 | 0.9  | 0.413 | 0.944 |
| AR        | MMP<br>2    | 9606.ENSPO<br>0000363822 | 9606.ENSPO<br>0000219070 | 0 | 0 | 0 | 0 | 0.061 | 0     | 0    | 0.4   | 0.412 |
| AR        | HSPB<br>1   | 9606.ENSPO<br>0000363822 | 9606.ENSPO<br>0000248553 | 0 | 0 | 0 | 0 | 0     | 0     | 0    | 0.443 | 0.443 |
| AR        | EGFR        | 9606.ENSPO<br>0000363822 | 9606.ENSPO<br>0000275493 | 0 | 0 | 0 | 0 | 0.062 | 0.402 | 0    | 0.678 | 0.803 |
| AR        | INSR        | 9606.ENSPO<br>0000363822 | 9606.ENSPO<br>0000303830 | 0 | 0 | 0 | 0 | 0.061 | 0.085 | 0    | 0.522 | 0.553 |

|     |             |                          |                          |   |   |   |       |       |       |     |       |       |
|-----|-------------|--------------------------|--------------------------|---|---|---|-------|-------|-------|-----|-------|-------|
| AR  | PRKB        | 9606.ENSP0<br>0000363822 | 9606.ENSP0<br>0000305355 | 0 | 0 | 0 | 0     | 0     | 0.348 | 0   | 0.318 | 0.536 |
| AR  | MET         | 9606.ENSP0<br>0000363822 | 9606.ENSP0<br>0000317272 | 0 | 0 | 0 | 0     | 0     | 0.085 | 0   | 0.738 | 0.75  |
| AR  | GSK3<br>B   | 9606.ENSP0<br>0000363822 | 9606.ENSP0<br>0000324806 | 0 | 0 | 0 | 0     | 0     | 0.407 | 0.9 | 0.49  | 0.967 |
| AR  | CYP3<br>A4  | 9606.ENSP0<br>0000363822 | 9606.ENSP0<br>0000337915 | 0 | 0 | 0 | 0     | 0     | 0.085 | 0   | 0.433 | 0.459 |
| AR  | E2F1        | 9606.ENSP0<br>0000363822 | 9606.ENSP0<br>0000345571 | 0 | 0 | 0 | 0     | 0     | 0.305 | 0   | 0.58  | 0.696 |
| AR  | PARP<br>1   | 9606.ENSP0<br>0000363822 | 9606.ENSP0<br>0000355759 | 0 | 0 | 0 | 0     | 0     | 0     | 0   | 0.445 | 0.445 |
| AR  | PTGS<br>2   | 9606.ENSP0<br>0000363822 | 9606.ENSP0<br>0000356438 | 0 | 0 | 0 | 0     | 0     | 0.05  | 0   | 0.437 | 0.442 |
| AR  | MMP<br>9    | 9606.ENSP0<br>0000363822 | 9606.ENSP0<br>0000361405 | 0 | 0 | 0 | 0     | 0     | 0     | 0   | 0.716 | 0.717 |
| AR  | PIM1        | 9606.ENSP0<br>0000363822 | 9606.ENSP0<br>0000362608 | 0 | 0 | 0 | 0     | 0     | 0     | 0   | 0.595 | 0.595 |
| AR  | CYP1<br>A1  | 9606.ENSP0<br>0000363822 | 9606.ENSP0<br>0000369050 | 0 | 0 | 0 | 0     | 0     | 0.085 | 0   | 0.417 | 0.444 |
| AR  | ESR1        | 9606.ENSP0<br>0000363822 | 9606.ENSP0<br>0000405330 | 0 | 0 | 0 | 0.656 | 0.062 | 0.379 | 0   | 0.936 | 0.587 |
| AR  | HIF1<br>A   | 9606.ENSP0<br>0000363822 | 9606.ENSP0<br>0000437955 | 0 | 0 | 0 | 0     | 0     | 0.413 | 0   | 0.378 | 0.619 |
| AR  | RELA        | 9606.ENSP0<br>0000363822 | 9606.ENSP0<br>0000384273 | 0 | 0 | 0 | 0     | 0     | 0.393 | 0   | 0.625 | 0.763 |
| AR  | CYP1<br>9A1 | 9606.ENSP0<br>0000363822 | 9606.ENSP0<br>0000379683 | 0 | 0 | 0 | 0     | 0     | 0.085 | 0   | 0.873 | 0.879 |
| AR  | PIK3<br>R1  | 9606.ENSP0<br>0000363822 | 9606.ENSP0<br>0000428056 | 0 | 0 | 0 | 0     | 0     | 0.153 | 0.9 | 0.517 | 0.955 |
| BAX | GSK3<br>B   | 9606.ENSP0<br>0000293288 | 9606.ENSP0<br>0000324806 | 0 | 0 | 0 | 0     | 0.059 | 0.384 | 0   | 0.215 | 0.505 |

|                 |             |                          |                          |   |   |   |       |       |       |     |       |       |
|-----------------|-------------|--------------------------|--------------------------|---|---|---|-------|-------|-------|-----|-------|-------|
| CBR<br>1        | CYP1<br>A1  | 9606.ENSPO<br>0000290349 | 9606.ENSPO<br>0000369050 | 0 | 0 | 0 | 0     | 0     | 0.059 | 0.9 | 0.205 | 0.918 |
| CBR<br>1        | CYP3<br>A4  | 9606.ENSPO<br>0000290349 | 9606.ENSPO<br>0000337915 | 0 | 0 | 0 | 0     | 0     | 0.059 | 0.9 | 0.29  | 0.927 |
| CHE<br>K1       | CSN<br>K2A1 | 9606.ENSPO<br>0000388648 | 9606.ENSPO<br>0000217244 | 0 | 0 | 0 | 0.596 | 0.061 | 0.402 | 0   | 0.263 | 0.469 |
| CHE<br>K1       | EGFR        | 9606.ENSPO<br>0000388648 | 9606.ENSPO<br>0000275493 | 0 | 0 | 0 | 0     | 0     | 0     | 0   | 0.531 | 0.531 |
| CHE<br>K1       | E2F1        | 9606.ENSPO<br>0000388648 | 9606.ENSPO<br>0000345571 | 0 | 0 | 0 | 0     | 0.16  | 0     | 0   | 0.456 | 0.524 |
| CHE<br>K1       | PIK3<br>CG  | 9606.ENSPO<br>0000388648 | 9606.ENSPO<br>0000352121 | 0 | 0 | 0 | 0     | 0     | 0.262 | 0   | 0.259 | 0.43  |
| CHE<br>K1       | TOP1        | 9606.ENSPO<br>0000388648 | 9606.ENSPO<br>0000354522 | 0 | 0 | 0 | 0     | 0.062 | 0.343 | 0   | 0.788 | 0.858 |
| CHE<br>K1       | PARP<br>1   | 9606.ENSPO<br>0000388648 | 9606.ENSPO<br>0000355759 | 0 | 0 | 0 | 0     | 0.17  | 0.135 | 0   | 0.786 | 0.833 |
| CHE<br>K1       | MMP<br>9    | 9606.ENSPO<br>0000388648 | 9606.ENSPO<br>0000361405 | 0 | 0 | 0 | 0     | 0     | 0     | 0   | 0.513 | 0.513 |
| CHE<br>K1       | RELA        | 9606.ENSPO<br>0000388648 | 9606.ENSPO<br>0000384273 | 0 | 0 | 0 | 0     | 0     | 0.294 | 0   | 0.561 | 0.677 |
| CHE<br>K1       | ESR1        | 9606.ENSPO<br>0000388648 | 9606.ENSPO<br>0000405330 | 0 | 0 | 0 | 0     | 0.061 | 0     | 0   | 0.414 | 0.426 |
| CHE<br>K1       | TOP2<br>A   | 9606.ENSPO<br>0000388648 | 9606.ENSPO<br>0000411532 | 0 | 0 | 0 | 0     | 0.803 | 0.4   | 0   | 0.606 | 0.949 |
| CSN<br>K2A<br>1 | HIF1<br>A   | 9606.ENSPO<br>0000217244 | 9606.ENSPO<br>0000437955 | 0 | 0 | 0 | 0     | 0     | 0.379 | 0   | 0.111 | 0.424 |
| CSN<br>K2A<br>1 | HSF1        | 9606.ENSPO<br>0000217244 | 9606.ENSPO<br>0000431512 | 0 | 0 | 0 | 0     | 0     | 0.476 | 0   | 0.118 | 0.518 |
| CSN<br>K2A<br>1 | TOP1        | 9606.ENSPO<br>0000217244 | 9606.ENSPO<br>0000354522 | 0 | 0 | 0 | 0     | 0.064 | 0.379 | 0   | 0.243 | 0.521 |

|                 |            |                          |                          |   |   |       |       |       |       |     |       |       |
|-----------------|------------|--------------------------|--------------------------|---|---|-------|-------|-------|-------|-----|-------|-------|
| CSN<br>K2A<br>1 | RELA       | 9606.ENSPO<br>0000217244 | 9606.ENSPO<br>0000384273 | 0 | 0 | 0     | 0     | 0.052 | 0.305 | 0   | 0.511 | 0.65  |
| CSN<br>K2A<br>1 | TOP2<br>A  | 9606.ENSPO<br>0000217244 | 9606.ENSPO<br>0000411532 | 0 | 0 | 0     | 0     | 0.084 | 0.892 | 0   | 0.463 | 0.942 |
| CYP<br>19A<br>1 | EGFR       | 9606.ENSPO<br>0000379683 | 9606.ENSPO<br>0000275493 | 0 | 0 | 0     | 0     | 0     | 0     | 0   | 0.648 | 0.648 |
| CYP<br>19A<br>1 | CYP3<br>A4 | 9606.ENSPO<br>0000379683 | 9606.ENSPO<br>0000337915 | 0 | 0 | 0.419 | 0.577 | 0     | 0     | 0.9 | 0.609 | 0.937 |
| CYP<br>19A<br>1 | ESR2       | 9606.ENSPO<br>0000379683 | 9606.ENSPO<br>0000343925 | 0 | 0 | 0     | 0     | 0.062 | 0.085 | 0   | 0.845 | 0.855 |
| CYP<br>19A<br>1 | PTGS<br>2  | 9606.ENSPO<br>0000379683 | 9606.ENSPO<br>0000356438 | 0 | 0 | 0     | 0     | 0.05  | 0     | 0   | 0.635 | 0.639 |
| CYP<br>19A<br>1 | CYP1<br>A1 | 9606.ENSPO<br>0000379683 | 9606.ENSPO<br>0000369050 | 0 | 0 | 0.409 | 0.563 | 0     | 0     | 0.9 | 0.68  | 0.941 |
| CYP<br>19A<br>1 | CYP1<br>B1 | 9606.ENSPO<br>0000379683 | 9606.ENSPO<br>0000478561 | 0 | 0 | 0.365 | 0.555 | 0     | 0     | 0   | 0.679 | 0.426 |
| CYP<br>19A<br>1 | ESR1       | 9606.ENSPO<br>0000379683 | 9606.ENSPO<br>0000405330 | 0 | 0 | 0     | 0     | 0     | 0.085 | 0   | 0.96  | 0.962 |
| CYP<br>1A1      | PON<br>1   | 9606.ENSPO<br>0000369050 | 9606.ENSPO<br>0000222381 | 0 | 0 | 0     | 0     | 0.055 | 0     | 0   | 0.428 | 0.436 |
| CYP<br>1A1      | NR1I<br>2  | 9606.ENSPO<br>0000369050 | 9606.ENSPO<br>0000336528 | 0 | 0 | 0     | 0     | 0.062 | 0.085 | 0   | 0.677 | 0.699 |
| CYP<br>1A1      | CYP3<br>A4 | 9606.ENSPO<br>0000369050 | 9606.ENSPO<br>0000337915 | 0 | 0 | 0.443 | 0.605 | 0.129 | 0     | 0.9 | 0.895 | 0.95  |

|            |            |                          |                          |   |   |       |       |       |       |     |       |       |
|------------|------------|--------------------------|--------------------------|---|---|-------|-------|-------|-------|-----|-------|-------|
| CYP<br>1A1 | CYP1<br>A2 | 9606.ENSPO<br>0000369050 | 9606.ENSPO<br>0000342007 | 0 | 0 | 0.448 | 0.975 | 0.077 | 0     | 0.8 | 0.92  | 0.813 |
| CYP<br>1A1 | ESR2       | 9606.ENSPO<br>0000369050 | 9606.ENSPO<br>0000343925 | 0 | 0 | 0     | 0     | 0.064 | 0.085 | 0   | 0.52  | 0.553 |
| CYP<br>1A1 | PTGS<br>2  | 9606.ENSPO<br>0000369050 | 9606.ENSPO<br>0000356438 | 0 | 0 | 0     | 0     | 0.055 | 0     | 0   | 0.495 | 0.502 |
| CYP<br>1A1 | ESR1       | 9606.ENSPO<br>0000369050 | 9606.ENSPO<br>0000405330 | 0 | 0 | 0     | 0     | 0.061 | 0.085 | 0   | 0.675 | 0.696 |
| CYP<br>1A1 | RXRA       | 9606.ENSPO<br>0000369050 | 9606.ENSPO<br>0000419692 | 0 | 0 | 0     | 0     | 0.051 | 0.085 | 0.9 | 0.212 | 0.922 |
| CYP<br>1A1 | CYP1<br>B1 | 9606.ENSPO<br>0000369050 | 9606.ENSPO<br>0000478561 | 0 | 0 | 0.424 | 0.893 | 0.277 | 0     | 0.9 | 0.936 | 0.935 |
| CYP<br>1A2 | PON<br>1   | 9606.ENSPO<br>0000342007 | 9606.ENSPO<br>0000222381 | 0 | 0 | 0     | 0     | 0     | 0     | 0   | 0.428 | 0.428 |
| CYP<br>1A2 | NR1I<br>2  | 9606.ENSPO<br>0000342007 | 9606.ENSPO<br>0000336528 | 0 | 0 | 0     | 0     | 0     | 0.085 | 0   | 0.677 | 0.692 |
| CYP<br>1A2 | CYP3<br>A4 | 9606.ENSPO<br>0000342007 | 9606.ENSPO<br>0000337915 | 0 | 0 | 0.442 | 0.604 | 0.139 | 0     | 0.9 | 0.935 | 0.952 |
| CYP<br>1A2 | ESR1       | 9606.ENSPO<br>0000342007 | 9606.ENSPO<br>0000405330 | 0 | 0 | 0     | 0     | 0     | 0.085 | 0   | 0.395 | 0.423 |
| CYP<br>1A2 | CYP1<br>B1 | 9606.ENSPO<br>0000342007 | 9606.ENSPO<br>0000478561 | 0 | 0 | 0.418 | 0.882 | 0     | 0     | 0.8 | 0.833 | 0.827 |
| CYP<br>1A2 | XDH        | 9606.ENSPO<br>0000342007 | 9606.ENSPO<br>0000368727 | 0 | 0 | 0     | 0     | 0.061 | 0     | 0.9 | 0.096 | 0.907 |
| CYP<br>1B1 | MMP<br>2   | 9606.ENSPO<br>0000478561 | 9606.ENSPO<br>0000219070 | 0 | 0 | 0     | 0     | 0.063 | 0     | 0   | 0.479 | 0.491 |
| CYP<br>1B1 | NR1I<br>2  | 9606.ENSPO<br>0000478561 | 9606.ENSPO<br>0000336528 | 0 | 0 | 0     | 0     | 0.061 | 0.085 | 0   | 0.503 | 0.535 |
| CYP<br>1B1 | CYP3<br>A4 | 9606.ENSPO<br>0000478561 | 9606.ENSPO<br>0000337915 | 0 | 0 | 0.403 | 0.597 | 0.093 | 0     | 0   | 0.734 | 0.455 |
| CYP<br>1B1 | ESR2       | 9606.ENSPO<br>0000478561 | 9606.ENSPO<br>0000343925 | 0 | 0 | 0     | 0     | 0.063 | 0.085 | 0   | 0.689 | 0.711 |

|            |           |                          |                          |   |   |   |   |       |       |   |       |       |
|------------|-----------|--------------------------|--------------------------|---|---|---|---|-------|-------|---|-------|-------|
| CYP<br>1B1 | PTGS<br>2 | 9606.ENSP0<br>0000478561 | 9606.ENSP0<br>0000356438 | 0 | 0 | 0 | 0 | 0.101 | 0     | 0 | 0.656 | 0.678 |
| CYP<br>1B1 | ESR1      | 9606.ENSP0<br>0000478561 | 9606.ENSP0<br>0000405330 | 0 | 0 | 0 | 0 | 0.073 | 0.085 | 0 | 0.645 | 0.673 |
| CYP<br>3A4 | PON<br>1  | 9606.ENSP0<br>0000337915 | 9606.ENSP0<br>0000222381 | 0 | 0 | 0 | 0 | 0.097 | 0     | 0 | 0.421 | 0.454 |
| CYP<br>3A4 | EGFR      | 9606.ENSP0<br>0000337915 | 9606.ENSP0<br>0000275493 | 0 | 0 | 0 | 0 | 0     | 0     | 0 | 0.45  | 0.45  |
| CYP<br>3A4 | F2        | 9606.ENSP0<br>0000337915 | 9606.ENSP0<br>0000308541 | 0 | 0 | 0 | 0 | 0.087 | 0.05  | 0 | 0.491 | 0.519 |
| CYP<br>3A4 | NR1I<br>2 | 9606.ENSP0<br>0000337915 | 9606.ENSP0<br>0000336528 | 0 | 0 | 0 | 0 | 0.134 | 0.085 | 0 | 0.955 | 0.962 |
| CYP<br>3A4 | RXRA      | 9606.ENSP0<br>0000337915 | 9606.ENSP0<br>0000419692 | 0 | 0 | 0 | 0 | 0     | 0.085 | 0 | 0.433 | 0.459 |
| CYP<br>3A4 | ESR1      | 9606.ENSP0<br>0000337915 | 9606.ENSP0<br>0000405330 | 0 | 0 | 0 | 0 | 0.049 | 0.085 | 0 | 0.522 | 0.548 |
| E2F1       | EGFR      | 9606.ENSP0<br>0000345571 | 9606.ENSP0<br>0000275493 | 0 | 0 | 0 | 0 | 0.061 | 0     | 0 | 0.501 | 0.511 |
| E2F1       | GSK3<br>B | 9606.ENSP0<br>0000345571 | 9606.ENSP0<br>0000324806 | 0 | 0 | 0 | 0 | 0     | 0.521 | 0 | 0.22  | 0.611 |
| E2F1       | TOP2<br>A | 9606.ENSP0<br>0000345571 | 9606.ENSP0<br>0000411532 | 0 | 0 | 0 | 0 | 0.297 | 0     | 0 | 0.212 | 0.422 |
| E2F1       | ESR1      | 9606.ENSP0<br>0000345571 | 9606.ENSP0<br>0000405330 | 0 | 0 | 0 | 0 | 0.062 | 0.379 | 0 | 0.413 | 0.628 |
| E2F1       | PARP<br>1 | 9606.ENSP0<br>0000345571 | 9606.ENSP0<br>0000355759 | 0 | 0 | 0 | 0 | 0.096 | 0.472 | 0 | 0.525 | 0.754 |
| EGF<br>R   | MMP<br>2  | 9606.ENSP0<br>0000275493 | 9606.ENSP0<br>0000219070 | 0 | 0 | 0 | 0 | 0.11  | 0     | 0 | 0.673 | 0.697 |
| EGF<br>R   | HSPB<br>1 | 9606.ENSP0<br>0000275493 | 9606.ENSP0<br>0000248553 | 0 | 0 | 0 | 0 | 0.089 | 0.692 | 0 | 0.671 | 0.899 |
| EGF<br>R   | F2        | 9606.ENSP0<br>0000275493 | 9606.ENSP0<br>0000308541 | 0 | 0 | 0 | 0 | 0.062 | 0     | 0 | 0.4   | 0.413 |

|          |            |                          |                          |   |   |   |       |       |       |     |       |       |
|----------|------------|--------------------------|--------------------------|---|---|---|-------|-------|-------|-----|-------|-------|
| EGF<br>R | PIM1       | 9606.ENSP0<br>0000275493 | 9606.ENSP0<br>0000362608 | 0 | 0 | 0 | 0.582 | 0     | 0.393 | 0   | 0.246 | 0.447 |
| EGF<br>R | RELA       | 9606.ENSP0<br>0000275493 | 9606.ENSP0<br>0000384273 | 0 | 0 | 0 | 0     | 0     | 0     | 0   | 0.473 | 0.473 |
| EGF<br>R | TOP2<br>A  | 9606.ENSP0<br>0000275493 | 9606.ENSP0<br>0000411532 | 0 | 0 | 0 | 0     | 0     | 0     | 0   | 0.53  | 0.53  |
| EGF<br>R | PIK3<br>CG | 9606.ENSP0<br>0000275493 | 9606.ENSP0<br>0000352121 | 0 | 0 | 0 | 0     | 0     | 0.08  | 0   | 0.511 | 0.53  |
| EGF<br>R | TOP1       | 9606.ENSP0<br>0000275493 | 9606.ENSP0<br>0000354522 | 0 | 0 | 0 | 0     | 0     | 0     | 0   | 0.531 | 0.531 |
| EGF<br>R | PARP<br>1  | 9606.ENSP0<br>0000275493 | 9606.ENSP0<br>0000355759 | 0 | 0 | 0 | 0     | 0     | 0.099 | 0   | 0.546 | 0.573 |
| EGF<br>R | MET        | 9606.ENSP0<br>0000275493 | 9606.ENSP0<br>0000317272 | 0 | 0 | 0 | 0.58  | 0.229 | 0.418 | 0   | 0.933 | 0.715 |
| EGF<br>R | ESR2       | 9606.ENSP0<br>0000275493 | 9606.ENSP0<br>0000343925 | 0 | 0 | 0 | 0     | 0     | 0.077 | 0   | 0.739 | 0.749 |
| EGF<br>R | MMP<br>9   | 9606.ENSP0<br>0000275493 | 9606.ENSP0<br>0000361405 | 0 | 0 | 0 | 0     | 0     | 0     | 0   | 0.828 | 0.828 |
| EGF<br>R | PTGS<br>2  | 9606.ENSP0<br>0000275493 | 9606.ENSP0<br>0000356438 | 0 | 0 | 0 | 0     | 0.061 | 0     | 0   | 0.869 | 0.872 |
| EGF<br>R | ESR1       | 9606.ENSP0<br>0000275493 | 9606.ENSP0<br>0000405330 | 0 | 0 | 0 | 0     | 0     | 0.402 | 0   | 0.908 | 0.943 |
| EGF<br>R | PRKC<br>B  | 9606.ENSP0<br>0000275493 | 9606.ENSP0<br>0000305355 | 0 | 0 | 0 | 0.553 | 0.049 | 0.403 | 0.9 | 0.304 | 0.945 |
| EGF<br>R | MMP<br>3   | 9606.ENSP0<br>0000275493 | 9606.ENSP0<br>0000299855 | 0 | 0 | 0 | 0     | 0.076 | 0     | 0.9 | 0.543 | 0.954 |
| EGF<br>R | PRKC<br>A  | 9606.ENSP0<br>0000275493 | 9606.ENSP0<br>0000408695 | 0 | 0 | 0 | 0.557 | 0.049 | 0.44  | 0.9 | 0.676 | 0.959 |
| EGF<br>R | HIF1<br>A  | 9606.ENSP0<br>0000275493 | 9606.ENSP0<br>0000437955 | 0 | 0 | 0 | 0     | 0     | 0     | 0.9 | 0.743 | 0.973 |
| EGF<br>R | PIK3<br>R1 | 9606.ENSP0<br>0000275493 | 9606.ENSP0<br>0000428056 | 0 | 0 | 0 | 0     | 0     | 0.882 | 0.9 | 0.581 | 0.994 |

|      |            |                          |                          |   |   |   |       |       |       |     |       |       |
|------|------------|--------------------------|--------------------------|---|---|---|-------|-------|-------|-----|-------|-------|
| ESR1 | MMP<br>2   | 9606.ENSPO<br>0000405330 | 9606.ENSPO<br>0000219070 | 0 | 0 | 0 | 0     | 0     | 0     | 0   | 0.532 | 0.532 |
| ESR1 | HSPB<br>1  | 9606.ENSPO<br>0000405330 | 9606.ENSPO<br>0000248553 | 0 | 0 | 0 | 0     | 0     | 0.336 | 0.9 | 0.414 | 0.957 |
| ESR1 | MMP<br>3   | 9606.ENSPO<br>0000405330 | 9606.ENSPO<br>0000299855 | 0 | 0 | 0 | 0     | 0     | 0     | 0   | 0.426 | 0.426 |
| ESR1 | MET        | 9606.ENSPO<br>0000405330 | 9606.ENSPO<br>0000317272 | 0 | 0 | 0 | 0     | 0     | 0.085 | 0   | 0.448 | 0.473 |
| ESR1 | GSK3<br>B  | 9606.ENSPO<br>0000405330 | 9606.ENSPO<br>0000324806 | 0 | 0 | 0 | 0     | 0     | 0.085 | 0   | 0.38  | 0.409 |
| ESR1 | ESR2       | 9606.ENSPO<br>0000405330 | 9606.ENSPO<br>0000343925 | 0 | 0 | 0 | 0.925 | 0.061 | 0.379 | 0.9 | 0.967 | 0.941 |
| ESR1 | TOP1       | 9606.ENSPO<br>0000405330 | 9606.ENSPO<br>0000354522 | 0 | 0 | 0 | 0     | 0.061 | 0.043 | 0   | 0.398 | 0.411 |
| ESR1 | PARP<br>1  | 9606.ENSPO<br>0000405330 | 9606.ENSPO<br>0000355759 | 0 | 0 | 0 | 0     | 0     | 0.342 | 0   | 0.652 | 0.761 |
| ESR1 | PTGS<br>2  | 9606.ENSPO<br>0000405330 | 9606.ENSPO<br>0000356438 | 0 | 0 | 0 | 0     | 0     | 0.05  | 0   | 0.771 | 0.773 |
| ESR1 | MMP<br>9   | 9606.ENSPO<br>0000405330 | 9606.ENSPO<br>0000361405 | 0 | 0 | 0 | 0     | 0     | 0     | 0   | 0.581 | 0.581 |
| ESR1 | RELA       | 9606.ENSPO<br>0000405330 | 9606.ENSPO<br>0000384273 | 0 | 0 | 0 | 0     | 0     | 0.393 | 0   | 0.473 | 0.666 |
| ESR1 | TOP2<br>A  | 9606.ENSPO<br>0000405330 | 9606.ENSPO<br>0000411532 | 0 | 0 | 0 | 0     | 0.061 | 0.043 | 0   | 0.477 | 0.488 |
| ESR1 | HIF1<br>A  | 9606.ENSPO<br>0000405330 | 9606.ENSPO<br>0000437955 | 0 | 0 | 0 | 0     | 0     | 0.413 | 0   | 0.695 | 0.813 |
| ESR1 | PIK3<br>R1 | 9606.ENSPO<br>0000405330 | 9606.ENSPO<br>0000428056 | 0 | 0 | 0 | 0     | 0.063 | 0.404 | 0.9 | 0.418 | 0.963 |
| ESR2 | PTGS<br>2  | 9606.ENSPO<br>0000343925 | 9606.ENSPO<br>0000356438 | 0 | 0 | 0 | 0     | 0     | 0.05  | 0   | 0.439 | 0.444 |
| ESR2 | HIF1<br>A  | 9606.ENSPO<br>0000343925 | 9606.ENSPO<br>0000437955 | 0 | 0 | 0 | 0     | 0     | 0.095 | 0   | 0.532 | 0.558 |

[illegible]

|           |            |                          |                          |   |   |   |       |       |       |     |       |       |
|-----------|------------|--------------------------|--------------------------|---|---|---|-------|-------|-------|-----|-------|-------|
| HIF1<br>A | MET        | 9606.ENSP0<br>0000437955 | 9606.ENSP0<br>0000317272 | 0 | 0 | 0 | 0     | 0     | 0.086 | 0   | 0.394 | 0.422 |
| HIF1<br>A | PARP<br>1  | 9606.ENSP0<br>0000437955 | 9606.ENSP0<br>0000355759 | 0 | 0 | 0 | 0     | 0     | 0.379 | 0   | 0.519 | 0.689 |
| HIF1<br>A | PTGS<br>2  | 9606.ENSP0<br>0000437955 | 9606.ENSP0<br>0000356438 | 0 | 0 | 0 | 0     | 0.077 | 0     | 0   | 0.533 | 0.55  |
| HIF1<br>A | MMP<br>9   | 9606.ENSP0<br>0000437955 | 9606.ENSP0<br>0000361405 | 0 | 0 | 0 | 0     | 0     | 0     | 0   | 0.55  | 0.55  |
| HIF1<br>A | RELA       | 9606.ENSP0<br>0000437955 | 9606.ENSP0<br>0000384273 | 0 | 0 | 0 | 0     | 0     | 0.379 | 0   | 0.378 | 0.597 |
| HIF1<br>A | HSF1       | 9606.ENSP0<br>0000437955 | 9606.ENSP0<br>0000431512 | 0 | 0 | 0 | 0     | 0     | 0.063 | 0   | 0.439 | 0.452 |
| HSF<br>1  | HSPB<br>1  | 9606.ENSP0<br>0000431512 | 9606.ENSP0<br>0000248553 | 0 | 0 | 0 | 0     | 0.09  | 0.294 | 0   | 0.755 | 0.828 |
| HSF<br>1  | INSR       | 9606.ENSP0<br>0000431512 | 9606.ENSP0<br>0000303830 | 0 | 0 | 0 | 0     | 0     | 0.098 | 0   | 0.404 | 0.439 |
| HSF<br>1  | PARP<br>1  | 9606.ENSP0<br>0000431512 | 9606.ENSP0<br>0000355759 | 0 | 0 | 0 | 0     | 0     | 0     | 0   | 0.579 | 0.579 |
| HSP<br>B1 | MMP<br>2   | 9606.ENSP0<br>0000248553 | 9606.ENSP0<br>0000219070 | 0 | 0 | 0 | 0     | 0.086 | 0     | 0   | 0.615 | 0.633 |
| HSP<br>B1 | MMP<br>9   | 9606.ENSP0<br>0000248553 | 9606.ENSP0<br>0000361405 | 0 | 0 | 0 | 0     | 0     | 0     | 0   | 0.6   | 0.6   |
| INSR      | PRKC<br>A  | 9606.ENSP0<br>0000303830 | 9606.ENSP0<br>0000408695 | 0 | 0 | 0 | 0.549 | 0     | 0.399 | 0   | 0.207 | 0.446 |
| INSR      | MET        | 9606.ENSP0<br>0000303830 | 9606.ENSP0<br>0000317272 | 0 | 0 | 0 | 0.576 | 0.061 | 0.389 | 0   | 0.312 | 0.473 |
| INSR      | PIK3<br>CG | 9606.ENSP0<br>0000303830 | 9606.ENSP0<br>0000352121 | 0 | 0 | 0 | 0     | 0.062 | 0.124 | 0   | 0.429 | 0.49  |
| INSR      | PRKC<br>B  | 9606.ENSP0<br>0000303830 | 9606.ENSP0<br>0000305355 | 0 | 0 | 0 | 0.55  | 0     | 0.073 | 0.8 | 0.254 | 0.826 |
| INSR      | PIK3<br>R1 | 9606.ENSP0<br>0000303830 | 9606.ENSP0<br>0000428056 | 0 | 0 | 0 | 0     | 0.061 | 0.472 | 0.9 | 0.492 | 0.971 |

|          |            |                          |                          |   |   |   |       |       |       |     |       |       |
|----------|------------|--------------------------|--------------------------|---|---|---|-------|-------|-------|-----|-------|-------|
| MET      | MMP<br>2   | 9606.ENSPO<br>0000317272 | 9606.ENSPO<br>0000219070 | 0 | 0 | 0 | 0     | 0.065 | 0     | 0   | 0.511 | 0.523 |
| MET      | PTGS<br>2  | 9606.ENSPO<br>0000317272 | 9606.ENSPO<br>0000356438 | 0 | 0 | 0 | 0     | 0.061 | 0.058 | 0   | 0.4   | 0.422 |
| MET      | MMP<br>9   | 9606.ENSPO<br>0000317272 | 9606.ENSPO<br>0000361405 | 0 | 0 | 0 | 0     | 0     | 0     | 0   | 0.546 | 0.546 |
| MET      | PARP<br>1  | 9606.ENSPO<br>0000317272 | 9606.ENSPO<br>0000355759 | 0 | 0 | 0 | 0     | 0.086 | 0.057 | 0   | 0.555 | 0.583 |
| MET      | PIK3<br>R1 | 9606.ENSPO<br>0000317272 | 9606.ENSPO<br>0000428056 | 0 | 0 | 0 | 0     | 0     | 0.407 | 0.9 | 0.262 | 0.952 |
| MM<br>P2 | MPO        | 9606.ENSPO<br>0000219070 | 9606.ENSPO<br>0000225275 | 0 | 0 | 0 | 0     | 0     | 0     | 0   | 0.511 | 0.511 |
| MM<br>P2 | RELA       | 9606.ENSPO<br>0000219070 | 9606.ENSPO<br>0000384273 | 0 | 0 | 0 | 0     | 0     | 0.085 | 0   | 0.57  | 0.59  |
| MM<br>P2 | PTGS<br>2  | 9606.ENSPO<br>0000219070 | 9606.ENSPO<br>0000356438 | 0 | 0 | 0 | 0     | 0.066 | 0     | 0   | 0.696 | 0.704 |
| MM<br>P2 | MMP<br>9   | 9606.ENSPO<br>0000219070 | 9606.ENSPO<br>0000361405 | 0 | 0 | 0 | 0.929 | 0.061 | 0     | 0.9 | 0.958 | 0.908 |
| MM<br>P2 | MMP<br>3   | 9606.ENSPO<br>0000219070 | 9606.ENSPO<br>0000299855 | 0 | 0 | 0 | 0.88  | 0.181 | 0     | 0.9 | 0.892 | 0.923 |
| MM<br>P3 | MPO        | 9606.ENSPO<br>0000299855 | 9606.ENSPO<br>0000225275 | 0 | 0 | 0 | 0     | 0     | 0     | 0   | 0.456 | 0.456 |
| MM<br>P3 | PTGS<br>2  | 9606.ENSPO<br>0000299855 | 9606.ENSPO<br>0000356438 | 0 | 0 | 0 | 0     | 0.095 | 0     | 0   | 0.774 | 0.787 |
| MM<br>P3 | PRSS<br>1  | 9606.ENSPO<br>0000299855 | 9606.ENSPO<br>0000308720 | 0 | 0 | 0 | 0     | 0     | 0     | 0.9 | 0.063 | 0.902 |
| MM<br>P3 | PRKC<br>A  | 9606.ENSPO<br>0000299855 | 9606.ENSPO<br>0000408695 | 0 | 0 | 0 | 0     | 0     | 0     | 0.9 | 0.152 | 0.911 |
| MM<br>P3 | MMP<br>9   | 9606.ENSPO<br>0000299855 | 9606.ENSPO<br>0000361405 | 0 | 0 | 0 | 0.791 | 0.518 | 0     | 0.9 | 0.911 | 0.959 |
| MM<br>P9 | MPO        | 9606.ENSPO<br>0000361405 | 9606.ENSPO<br>0000225275 | 0 | 0 | 0 | 0     | 0.076 | 0     | 0   | 0.704 | 0.714 |

|            |            |                          |                          |   |   |   |       |       |       |     |       |       |
|------------|------------|--------------------------|--------------------------|---|---|---|-------|-------|-------|-----|-------|-------|
| MM<br>P9   | PRSS<br>1  | 9606.ENSPO<br>0000361405 | 9606.ENSPO<br>0000308720 | 0 | 0 | 0 | 0     | 0     | 0     | 0.9 | 0.2   | 0.916 |
| MM<br>P9   | PTGS<br>2  | 9606.ENSPO<br>0000361405 | 9606.ENSPO<br>0000356438 | 0 | 0 | 0 | 0     | 0.097 | 0     | 0   | 0.725 | 0.741 |
| MM<br>P9   | RELA       | 9606.ENSPO<br>0000361405 | 9606.ENSPO<br>0000384273 | 0 | 0 | 0 | 0     | 0     | 0.344 | 0   | 0.683 | 0.783 |
| MPO        | PON<br>1   | 9606.ENSPO<br>0000225275 | 9606.ENSPO<br>0000222381 | 0 | 0 | 0 | 0     | 0     | 0     | 0   | 0.575 | 0.575 |
| MPO        | XDH        | 9606.ENSPO<br>0000225275 | 9606.ENSPO<br>0000368727 | 0 | 0 | 0 | 0     | 0     | 0     | 0   | 0.563 | 0.563 |
| MPO        | PTGS<br>2  | 9606.ENSPO<br>0000225275 | 9606.ENSPO<br>0000356438 | 0 | 0 | 0 | 0     | 0.065 | 0     | 0   | 0.691 | 0.699 |
| MPO        | PTGS<br>1  | 9606.ENSPO<br>0000225275 | 9606.ENSPO<br>0000354612 | 0 | 0 | 0 | 0     | 0.076 | 0     | 0.9 | 0.408 | 0.94  |
| NR1I<br>2  | RXRA       | 9606.ENSPO<br>0000336528 | 9606.ENSPO<br>0000419692 | 0 | 0 | 0 | 0.631 | 0.061 | 0.89  | 0   | 0.639 | 0.917 |
| PAR<br>P1  | TOP1       | 9606.ENSPO<br>0000355759 | 9606.ENSPO<br>0000354522 | 0 | 0 | 0 | 0     | 0.062 | 0.379 | 0   | 0.81  | 0.88  |
| PAR<br>P1  | TOP2<br>A  | 9606.ENSPO<br>0000355759 | 9606.ENSPO<br>0000411532 | 0 | 0 | 0 | 0     | 0.175 | 0     | 0   | 0.326 | 0.42  |
| PAR<br>P1  | RELA       | 9606.ENSPO<br>0000355759 | 9606.ENSPO<br>0000384273 | 0 | 0 | 0 | 0     | 0     | 0.379 | 0   | 0.616 | 0.751 |
| PIK3<br>CG | PRKC<br>B  | 9606.ENSPO<br>0000352121 | 9606.ENSPO<br>0000305355 | 0 | 0 | 0 | 0     | 0.116 | 0.379 | 0   | 0.625 | 0.776 |
| PIK3<br>CG | PIK3<br>R1 | 9606.ENSPO<br>0000352121 | 9606.ENSPO<br>0000428056 | 0 | 0 | 0 | 0     | 0.061 | 0.446 | 0.9 | 0.691 | 0.981 |
| PIK3<br>R1 | RELA       | 9606.ENSPO<br>0000428056 | 9606.ENSPO<br>0000384273 | 0 | 0 | 0 | 0     | 0     | 0     | 0.9 | 0.236 | 0.92  |
| PIK3<br>R1 | RXRA       | 9606.ENSPO<br>0000428056 | 9606.ENSPO<br>0000419692 | 0 | 0 | 0 | 0     | 0     | 0.404 | 0   | 0.181 | 0.492 |
| PRK<br>CA  | PRKC<br>B  | 9606.ENSPO<br>0000408695 | 9606.ENSPO<br>0000305355 | 0 | 0 | 0 | 0.981 | 0     | 0.39  | 0.9 | 0.9   | 0.937 |

|           |           |                          |                          |   |   |       |       |       |       |      |       |       |
|-----------|-----------|--------------------------|--------------------------|---|---|-------|-------|-------|-------|------|-------|-------|
| PRK<br>CA | RELA      | 9606.ENSPO<br>0000408695 | 9606.ENSPO<br>0000384273 | 0 | 0 | 0     | 0     | 0     | 0     | 0.9  | 0.214 | 0.918 |
| PRK<br>CA | TOP2<br>A | 9606.ENSPO<br>0000408695 | 9606.ENSPO<br>0000411532 | 0 | 0 | 0     | 0     | 0     | 0.563 | 0    | 0.088 | 0.584 |
| PRK<br>CA | RXRA      | 9606.ENSPO<br>0000408695 | 9606.ENSPO<br>0000419692 | 0 | 0 | 0     | 0     | 0     | 0     | 0.9  | 0.123 | 0.908 |
| PRK<br>CB | TYR       | 9606.ENSPO<br>0000305355 | 9606.ENSPO<br>0000263321 | 0 | 0 | 0     | 0     | 0.063 | 0     | 0.8  | 0.246 | 0.846 |
| PRK<br>CB | TOP2<br>A | 9606.ENSPO<br>0000305355 | 9606.ENSPO<br>0000411532 | 0 | 0 | 0     | 0     | 0     | 0.563 | 0    | 0     | 0.563 |
| PRK<br>CB | RELA      | 9606.ENSPO<br>0000305355 | 9606.ENSPO<br>0000384273 | 0 | 0 | 0     | 0     | 0     | 0     | 0.9  | 0.222 | 0.918 |
| PTG<br>S1 | TYR       | 9606.ENSPO<br>0000354612 | 9606.ENSPO<br>0000263321 | 0 | 0 | 0     | 0     | 0.051 | 0     | 0    | 0.4   | 0.406 |
| PTG<br>S1 | PTGS<br>2 | 9606.ENSPO<br>0000354612 | 9606.ENSPO<br>0000356438 | 0 | 0 | 0.432 | 0.967 | 0.14  | 0.379 | 0.8  | 0.956 | 0.889 |
| PTG<br>S2 | RELA      | 9606.ENSPO<br>0000356438 | 9606.ENSPO<br>0000384273 | 0 | 0 | 0     | 0     | 0     | 0     | 0    | 0.558 | 0.558 |
| RELA      | RXRA      | 9606.ENSPO<br>0000384273 | 9606.ENSPO<br>0000419692 | 0 | 0 | 0     | 0     | 0.09  | 0.524 | 0    | 0.21  | 0.628 |
| TOP<br>1  | TOP2<br>A | 9606.ENSPO<br>0000354522 | 9606.ENSPO<br>0000411532 | 0 | 0 | 0     | 0     | 0.112 | 0.925 | 0.54 | 0.918 | 0.997 |
