# Supplementary material for: Pharmacological Mechanisms Underlying the Hepatoprotective Effects of Ecliptae herba on Hepatocellular Carcinoma
Source: Evid Based Complement Alternat Med. 2021 Jul 16;2021:5591402. doi: 10.1155/2021/5591402 (PMC8302389; doi:10.1155/2021/5591402)
Supplement: Supplementary Materials — Supplementary File S1: a total of 48 chemical ingredients of EH were obtained from TCMSP. Supplementary File S2: detailed information of the targets of 6 active ingredients in EH was extracted from three databases, TCMSP, DGIDB, and SwissTargetPrediction. Supplementary File S3: detailed information on HCC-related targets was extracted from GeneCards and CTD. Supplementary File S4: detailed information on the PPI network of 52 potential therapeutic targets for HCC was obtained from the STRING platform. Supplementary File S5: topological parameters of nodes in the E-H network obtained from Cytoscape. Supplementary File S6: detailed information on GO enrichment analysis obtained from WebGestalt. Supplementary File S7: detailed information on the top 10 GO terms of the GO network in the TCGA RNASeq LIHC database through Network Topology-based Analysis obtained from WebGestalt. Supplementary File S8: detailed information on the top 20 KEGG enrichment pathways obtained from the WebGestalt. Supplementary File S9: detailed information on the C-T-P network obtained from Cytoscape. [file 5591402.f1.zip › 5591402.f1/Supplementary File S5.pdf]

| Topological parameters of nodes in E-H network obtained from cytoscape |                                   |                               |                             |                               |                    |                       |                      |                      |               |                                  |                               |                                 |                                      |                   |                  |                       |                        |                |                                |
|------------------------------------------------------------------------|-----------------------------------|-------------------------------|-----------------------------|-------------------------------|--------------------|-----------------------|----------------------|----------------------|---------------|----------------------------------|-------------------------------|---------------------------------|--------------------------------------|-------------------|------------------|-----------------------|------------------------|----------------|--------------------------------|
| S<br>U<br>I<br>D                                                       | AverageS<br>hortestPat<br>hLength | Between<br>nessCe<br>ntrality | Closen<br>essCen<br>trality | Clusteri<br>ngCoef<br>ficient | D<br>egr<br>e<br>e | degr<br>ee.la<br>yout | Ecc<br>entr<br>icity | IsSin<br>gleN<br>ode | na<br>me      | Neighbor<br>hoodCon<br>nectivity | Number<br>OfDirect<br>edEdges | NumberO<br>fUndirecte<br>dEdges | PartnerOfM<br>ultiEdgedN<br>odePairs | Ra<br>dia<br>lity | sel<br>ect<br>ed | Self<br>Lo<br>op<br>s | shar<br>ed<br>na<br>me | St<br>re<br>ss | Topolo<br>gicalCo<br>efficient |
| 1<br>3<br>1                                                            | 1.313725                          | 0.206016                      | 0.761194                    | 0.258824                      | 35                 | 35                    | 2                    | FALS<br>E            | AK<br>T1      | 12.25714                         | 35                            | 0                               | 0                                    | 0.921569          | FA<br>LS<br>E    | 0                     | AKT<br>1               | 2000           | 0.240336                       |
| 1<br>2<br>3                                                            | 1.431373                          | 0.089246                      | 0.69863                     | 0.337438                      | 29                 | 29                    | 2                    | FALS<br>E            | EG<br>FR      | 13.7931                          | 29                            | 0                               | 0                                    | 0.892157          | FA<br>LS<br>E    | 0                     | EGF<br>R               | 1148           | 0.270453                       |
| 1<br>2<br>5                                                            | 1.470588                          | 0.067784                      | 0.68                        | 0.39886                       | 27                 | 27                    | 2                    | FALS<br>E            | ES<br>R1      | 14.92593                         | 27                            | 0                               | 0                                    | 0.882353          | FA<br>LS<br>E    | 0                     | ESR<br>1               | 1006           | 0.292665                       |
| 1<br>4<br>4                                                            | 1.509804                          | 0.085964                      | 0.662338                    | 0.346667                      | 25                 | 25                    | 2                    | FALS<br>E            | PT<br>GS<br>2 | 14.08                            | 25                            | 0                               | 0                                    | 0.872549          | FA<br>LS<br>E    | 0                     | PTG<br>S2              | 1076           | 0.276078                       |
| 1<br>0<br>3                                                            | 1.588235                          | 0.041309                      | 0.62963                     | 0.424242                      | 22                 | 22                    | 3                    | FALS<br>E            | AR            | 15.68182                         | 22                            | 0                               | 0                                    | 0.852941          | FA<br>LS<br>E    | 0                     | AR                     | 638            | 0.313636                       |
| 1<br>5<br>4                                                            | 1.647059                          | 0.040523                      | 0.607143                    | 0.45614                       | 19                 | 19                    | 3                    | FALS<br>E            | M<br>MP<br>9  | 15.42105                         | 19                            | 0                               | 0                                    | 0.838235          | FA<br>LS<br>E    | 0                     | MM<br>P9               | 604            | 0.308421                       |
| 1<br>5<br>6                                                            | 1.666667                          | 0.027075                      | 0.6                         | 0.450292                      | 19                 | 19                    | 3                    | FALS<br>E            | RE<br>LA      | 16.21053                         | 19                            | 0                               | 0                                    | 0.833333          | FA<br>LS<br>E    | 0                     | REL<br>A               | 404            | 0.330827                       |

|             |          |              |              |              |    |    |   |           |                |          |    |   |   |                      |               |   |            |             |         |
|-------------|----------|--------------|--------------|--------------|----|----|---|-----------|----------------|----------|----|---|---|----------------------|---------------|---|------------|-------------|---------|
| 1<br>0<br>0 | 1.72549  | 0.02804<br>5 | 0.5795<br>45 | 0.4333<br>33 | 16 | 16 | 3 | FALS<br>E | AB<br>CG<br>2  | 15       | 16 | 0 | 0 | 0.8<br>18<br>62<br>7 | FA<br>LS<br>E | 0 | ABC<br>G2  | 3<br>8<br>2 | 0.30612 |
| 1<br>2<br>7 | 1.686275 | 0.04894<br>5 | 0.5930<br>23 | 0.55         | 16 | 16 | 2 | FALS<br>E | AH<br>R        | 17.0625  | 16 | 0 | 0 | 0.8<br>28<br>43<br>1 | FA<br>LS<br>E | 0 | AH<br>R    | 4<br>8<br>4 | 0.34    |
| 1<br>2<br>9 | 1.764706 | 0.03839<br>2 | 0.5666<br>67 | 0.3583<br>33 | 16 | 16 | 3 | FALS<br>E | CY<br>P3<br>A4 | 12.75    | 16 | 0 | 0 | 0.8<br>08<br>82<br>4 | FA<br>LS<br>E | 0 | CYP<br>3A4 | 5<br>2<br>8 | 0.27127 |
| 2<br>2<br>2 | 1.784314 | 0.01326<br>9 | 0.5604<br>4  | 0.5523<br>81 | 15 | 15 | 3 | FALS<br>E | HIF<br>1A      | 17.26667 | 15 | 0 | 0 | 0.8<br>03<br>92<br>2 | FA<br>LS<br>E | 0 | HIF<br>1A  | 2<br>3<br>6 | 0.36737 |
| 1<br>1<br>3 | 1.843137 | 0.02150<br>8 | 0.5425<br>53 | 0.4945<br>05 | 14 | 14 | 3 | FALS<br>E | CY<br>P1<br>A1 | 13.42857 | 14 | 0 | 0 | 0.7<br>89<br>21<br>6 | FA<br>LS<br>E | 0 | CYP<br>1A1 | 3<br>1<br>2 | 0.29841 |
| 1<br>8<br>0 | 1.764706 | 0.00854<br>7 | 0.5666<br>67 | 0.6153<br>85 | 14 | 14 | 3 | FALS<br>E | M<br>MP<br>2   | 17.78571 | 14 | 0 | 0 | 0.8<br>08<br>82<br>4 | FA<br>LS<br>E | 0 | MM<br>P2   | 1<br>6<br>0 | 0.36297 |
| 2<br>0<br>4 | 1.862745 | 0.00983<br>1 | 0.5368<br>42 | 0.4945<br>05 | 14 | 14 | 3 | FALS<br>E | PA<br>RP<br>1  | 16.07143 | 14 | 0 | 0 | 0.7<br>84<br>31<br>4 | FA<br>LS<br>E | 0 | PAR<br>P1  | 1<br>7<br>4 | 0.36526 |
| 1<br>9<br>6 | 1.803922 | 0.01638<br>7 | 0.5543<br>48 | 0.4230<br>77 | 13 | 13 | 3 | FALS<br>E | GS<br>K3<br>B  | 15.46154 | 13 | 0 | 0 | 0.7<br>99<br>02      | FA<br>LS<br>E | 0 | GSK<br>3B  | 2<br>2<br>6 | 0.32211 |
| 2<br>1      | 1.862745 | 0.01009      | 0.5368<br>42 | 0.4615<br>38 | 13 | 13 | 3 | FALS<br>E | PIK<br>3R      | 16.23077 | 13 | 0 | 0 | 0.7<br>84            | FA<br>LS      | 0 | PIK<br>3R1 | 1<br>3      | 0.36068 |

|             |          |              |              |              |    |    |   |           |                |          |    |   |   |                      |               |   |            |             |              |
|-------------|----------|--------------|--------------|--------------|----|----|---|-----------|----------------|----------|----|---|---|----------------------|---------------|---|------------|-------------|--------------|
| 8           |          |              |              |              |    |    |   |           | 1              |          |    |   |   | 31<br>4              | E             |   |            | 0           |              |
| 1<br>4<br>0 | 1.823529 | 0.02247<br>4 | 0.5483<br>87 | 0.5151<br>52 | 12 | 12 | 3 | FALS<br>E | AP<br>P        | 17.33333 | 12 | 0 | 0 | 0.7<br>94<br>11<br>8 | FA<br>LS<br>E | 0 | APP        | 3<br>5<br>8 | 0.36111<br>1 |
| 2<br>1<br>3 | 1.862745 | 0.00799<br>4 | 0.5368<br>42 | 0.5606<br>06 | 12 | 12 | 3 | FALS<br>E | CH<br>EK<br>1  | 16.16667 | 12 | 0 | 0 | 0.7<br>84<br>31<br>4 | FA<br>LS<br>E | 0 | CHE<br>K1  | 1<br>4<br>6 | 0.35144<br>9 |
| 1<br>0<br>5 | 1.960784 | 0.00368<br>8 | 0.51         | 0.6545<br>45 | 11 | 11 | 3 | FALS<br>E | CY<br>P1<br>B1 | 15.18182 | 11 | 0 | 0 | 0.7<br>59<br>80<br>4 | FA<br>LS<br>E | 0 | CYP<br>1B1 | 5<br>4      | 0.36147<br>2 |
| 1<br>0<br>9 | 1.901961 | 0.00454<br>6 | 0.5257<br>73 | 0.6          | 11 | 11 | 3 | FALS<br>E | ME<br>T        | 18.36364 | 11 | 0 | 0 | 0.7<br>74<br>51      | FA<br>LS<br>E | 0 | ME<br>T    | 9<br>8      | 0.40808<br>1 |
| 1<br>1<br>5 | 1.823529 | 0.00401<br>5 | 0.5483<br>87 | 0.6727<br>27 | 11 | 11 | 3 | FALS<br>E | ES<br>R2       | 19.18182 | 11 | 0 | 0 | 0.7<br>94<br>11<br>8 | FA<br>LS<br>E | 0 | ESR<br>2   | 1<br>0<br>4 | 0.39146<br>6 |
| 1<br>3<br>6 | 1.862745 | 0.02575<br>2 | 0.5368<br>42 | 0.4181<br>82 | 11 | 11 | 3 | FALS<br>E | MP<br>O        | 13.09091 | 11 | 0 | 0 | 0.7<br>84<br>31<br>4 | FA<br>LS<br>E | 0 | MP<br>O    | 2<br>7<br>4 | 0.28260<br>9 |
| 1<br>4<br>2 | 1.803922 | 0.00972<br>9 | 0.5543<br>48 | 0.4727<br>27 | 11 | 11 | 3 | FALS<br>E | F2             | 17       | 11 | 0 | 0 | 0.7<br>99<br>02      | FA<br>LS<br>E | 0 | F2         | 1<br>7<br>8 | 0.34         |
| 1<br>6<br>9 | 1.901961 | 0.01259<br>6 | 0.5257<br>73 | 0.4363<br>64 | 11 | 11 | 3 | FALS<br>E | PR<br>KC<br>B  | 14.81818 | 11 | 0 | 0 | 0.7<br>74<br>51      | FA<br>LS<br>E | 0 | PRK<br>CB  | 1<br>3<br>6 | 0.32929<br>3 |
| 2<br>4      | 2        | 0.00756<br>2 | 0.5          | 0.4909<br>09 | 11 | 11 | 3 | FALS<br>E | TO<br>P2       | 13.45455 | 11 | 0 | 0 | 0.7<br>5             | FA<br>LS      | 0 | TOP<br>2A  | 9<br>6      | 0.33636<br>4 |

|     |          |          |          |          |    |    |   |       |           |          |    |   |   |          |       |   |         |     |          |
|-----|----------|----------|----------|----------|----|----|---|-------|-----------|----------|----|---|---|----------|-------|---|---------|-----|----------|
| 0   |          |          |          |          |    |    |   |       | A         |          |    |   |   |          | E     |   |         |     |          |
| 117 | 1.980392 | 0.016896 | 0.504951 | 0.511111 | 10 | 10 | 3 | FALSE | CY P1 A2  | 12.3     | 10 | 0 | 0 | 0.754902 | FALSE | 0 | CYP1A2  | 172 | 0.297561 |
| 152 | 1.843137 | 0.001691 | 0.542553 | 0.8      | 10 | 10 | 3 | FALSE | CY P1 9A1 | 20.6     | 10 | 0 | 0 | 0.789216 | FALSE | 0 | CYP19A1 | 60  | 0.420408 |
| 190 | 1.843137 | 0.012356 | 0.542553 | 0.6      | 10 | 10 | 3 | FALSE | MMP3      | 18.6     | 10 | 0 | 0 | 0.789216 | FALSE | 0 | MM P3   | 204 | 0.379592 |
| 107 | 1.960784 | 0.001425 | 0.51     | 0.722222 | 9  | 9  | 3 | FALSE | E2F1      | 19.88889 | 9  | 0 | 0 | 0.759804 | FALSE | 0 | E2F1    | 30  | 0.45202  |
| 119 | 1.960784 | 0.002443 | 0.51     | 0.694444 | 9  | 9  | 3 | FALSE | TOP1      | 17.77778 | 9  | 0 | 0 | 0.759804 | FALSE | 0 | TOP1    | 74  | 0.40404  |
| 101 | 2.058824 | 0.003333 | 0.485714 | 0.464286 | 8  | 8  | 3 | FALSE | APEX1     | 13.75    | 8  | 0 | 0 | 0.735294 | FALSE | 0 | APEX1   | 72  | 0.34375  |
| 121 | 1.901961 | 0.003125 | 0.525773 | 0.714286 | 8  | 8  | 3 | FALSE | NR1I2     | 15.625   | 8  | 0 | 0 | 0.77451  | FALSE | 0 | NR1I2   | 72  | 0.325521 |
| 133 | 1.921569 | 0.006362 | 0.520408 | 0.535714 | 8  | 8  | 3 | FALSE | ACHE      | 15.125   | 8  | 0 | 0 | 0.769608 | FALSE | 0 | ACHE    | 104 | 0.321809 |
| 1   | 2.078431 | 0.00274  | 0.4811   | 0.5357   | 8  | 8  | 3 | FALSE | CS        | 14.5     | 8  | 0 | 0 | 0.7      | FA    | 0 | CS      | 5   | 0.37179  |

|             |          |              |              |              |   |   |   |           |                |          |   |   |   |                      |               |   |               |             |              |
|-------------|----------|--------------|--------------|--------------|---|---|---|-----------|----------------|----------|---|---|---|----------------------|---------------|---|---------------|-------------|--------------|
| 7<br>8      |          | 4            | 32           | 14           |   |   |   | E         | NK<br>2A<br>1  |          |   |   |   | 30<br>39<br>2        | LS<br>E       |   | NK2<br>A1     | 6           | 5            |
| 1<br>9<br>2 | 2.039216 | 0.00398      | 0.4903<br>85 | 0.4285<br>71 | 8 | 8 | 3 | FALS<br>E | INS<br>R       | 14.125   | 8 | 0 | 0 | 0.7<br>40<br>19<br>6 | FA<br>LS<br>E | 0 | INS<br>R      | 4<br>8      | 0.34451<br>2 |
| 2<br>0<br>8 | 1.921569 | 0.00538<br>5 | 0.5204<br>08 | 0.6785<br>71 | 8 | 8 | 3 | FALS<br>E | AL<br>OX<br>5  | 16.75    | 8 | 0 | 0 | 0.7<br>69<br>60<br>8 | FA<br>LS<br>E | 0 | AL<br>OX<br>5 | 9<br>8      | 0.35638<br>3 |
| 3<br>4<br>9 | 2.019608 | 0.00484<br>1 | 0.4951<br>46 | 0.3928<br>57 | 8 | 8 | 3 | FALS<br>E | PR<br>KC<br>A  | 13.5     | 8 | 0 | 0 | 0.7<br>45<br>09<br>8 | FA<br>LS<br>E | 0 | PRK<br>CA     | 5<br>4      | 0.32142<br>9 |
| 1<br>6<br>7 | 1.921569 | 0.02615<br>3 | 0.5204<br>08 | 0.2857<br>14 | 7 | 7 | 3 | FALS<br>E | AK<br>R1<br>B1 | 15.71429 | 7 | 0 | 0 | 0.7<br>69<br>60<br>8 | FA<br>LS<br>E | 0 | AKR<br>1B1    | 3<br>0<br>6 | 0.33540<br>4 |
| 1<br>8<br>3 | 1.980392 | 0.00172<br>9 | 0.5049<br>51 | 0.7619<br>05 | 7 | 7 | 3 | FALS<br>E | HS<br>PB<br>1  | 21.85714 | 7 | 0 | 0 | 0.7<br>54<br>90<br>2 | FA<br>LS<br>E | 0 | HSP<br>B1     | 3<br>4      | 0.48571<br>4 |
| 2<br>1<br>6 | 1.980392 | 0.00548<br>5 | 0.5049<br>51 | 0.3809<br>52 | 7 | 7 | 3 | FALS<br>E | RX<br>RA       | 16.14286 | 7 | 0 | 0 | 0.7<br>54<br>90<br>2 | FA<br>LS<br>E | 0 | RXR<br>A      | 8<br>6      | 0.35873      |
| 2<br>2<br>0 | 2.098039 | 0.00275<br>4 | 0.4766<br>36 | 0.3809<br>52 | 7 | 7 | 3 | FALS<br>E | HS<br>F1       | 14.28571 | 7 | 0 | 0 | 0.7<br>25<br>49      | FA<br>LS<br>E | 0 | HSF<br>1      | 3<br>8      | 0.3663       |
| 1<br>3<br>4 | 2.254902 | 0.00359<br>8 | 0.4434<br>78 | 0.4          | 6 | 6 | 3 | FALS<br>E | PO<br>N1       | 11.83333 | 6 | 0 | 0 | 0.6<br>86<br>27      | FA<br>LS<br>E | 0 | PO<br>N1      | 4<br>4      | 0.36979<br>2 |

|     |          |          |          |          |   |   |   |       |        |           |   |   |   |          |       |   |        |    |          |
|-----|----------|----------|----------|----------|---|---|---|-------|--------|-----------|---|---|---|----------|-------|---|--------|----|----------|
|     |          |          |          |          |   |   |   |       |        |           |   |   |   | 5        |       |   |        |    |          |
| 201 | 2.078431 | 9.86E-04 | 0.481132 | 0.666667 | 6 | 6 | 3 | FALSE | PIK3CG | 18        | 6 | 0 | 0 | 0.730392 | FALSE | 0 | PIK3CG | 14 | 0.439024 |
| 224 | 2.156863 | 0.005398 | 0.463636 | 0.4      | 6 | 6 | 3 | FALSE | ALOX15 | 13.833333 | 6 | 0 | 0 | 0.710784 | FALSE | 0 | ALOX15 | 48 | 0.373874 |
| 138 | 2.098039 | 0.004273 | 0.476636 | 0.4      | 5 | 5 | 3 | FALSE | TYR    | 14        | 5 | 0 | 0 | 0.72549  | FALSE | 0 | TYR    | 60 | 0.345    |
| 227 | 2.294118 | 0.002258 | 0.435897 | 0.5      | 5 | 5 | 3 | FALSE | PTGS1  | 11        | 5 | 0 | 0 | 0.676471 | FALSE | 0 | PTGS1  | 24 | 0.36     |
| 111 | 2.176471 | 4.74E-04 | 0.459459 | 0.666667 | 4 | 4 | 3 | FALSE | PIM1   | 18.5      | 4 | 0 | 0 | 0.705882 | FALSE | 0 | PIM1   | 6  | 0.486842 |
| 172 | 2.45098  | 0.001756 | 0.408    | 0        | 3 | 3 | 3 | FALSE | XDH    | 9.333333  | 3 | 0 | 0 | 0.637255 | FALSE | 0 | XDH    | 16 | 0.378788 |
| 176 | 2.509804 | 9.05E-04 | 0.398438 | 0.333333 | 3 | 3 | 4 | FALSE | CBR1   | 12.333333 | 3 | 0 | 0 | 0.622549 | FALSE | 0 | CBR1   | 8  | 0.545455 |
| 249 | 2.490196 | 1.31E-04 | 0.401575 | 0.666667 | 3 | 3 | 4 | FALSE | PRSS1  | 13.66667  | 3 | 0 | 0 | 0.627451 | FALSE | 0 | PRSS1  | 2  | 0.569444 |
| 1   | 2.235294 | 0        | 0.4473   | 1        | 2 | 2 | 3 | FALSE | BA     | 24        | 2 | 0 | 0 | 0.6      | FA    | 0 | BAX    | 0  | 0.64864  |

|     |          |   |       |   |   |   |   |           |               |    |   |   |   |         |               |   |           |   |   |
|-----|----------|---|-------|---|---|---|---|-----------|---------------|----|---|---|---|---------|---------------|---|-----------|---|---|
| 88  |          |   | 68    |   |   |   |   | E         | X             |    |   |   |   | 91176   | LS<br>E       |   |           |   | 9 |
| 149 | 2.666667 | 0 | 0.375 | 0 | 1 | 1 | 3 | FALS<br>E | GP<br>R3<br>5 | 16 | 1 | 0 | 0 | 0.58333 | FA<br>LS<br>E | 0 | GPR<br>35 | 0 | 0 |
