# Supplementary material for: Pharmacological Mechanisms Underlying the Hepatoprotective Effects of Ecliptae herba on Hepatocellular Carcinoma
Source: Evid Based Complement Alternat Med. 2021 Jul 16;2021:5591402. doi: 10.1155/2021/5591402 (PMC8302389; doi:10.1155/2021/5591402)
Supplement: Supplementary Materials — Supplementary File S1: a total of 48 chemical ingredients of EH were obtained from TCMSP. Supplementary File S2: detailed information of the targets of 6 active ingredients in EH was extracted from three databases, TCMSP, DGIDB, and SwissTargetPrediction. Supplementary File S3: detailed information on HCC-related targets was extracted from GeneCards and CTD. Supplementary File S4: detailed information on the PPI network of 52 potential therapeutic targets for HCC was obtained from the STRING platform. Supplementary File S5: topological parameters of nodes in the E-H network obtained from Cytoscape. Supplementary File S6: detailed information on GO enrichment analysis obtained from WebGestalt. Supplementary File S7: detailed information on the top 10 GO terms of the GO network in the TCGA RNASeq LIHC database through Network Topology-based Analysis obtained from WebGestalt. Supplementary File S8: detailed information on the top 20 KEGG enrichment pathways obtained from the WebGestalt. Supplementary File S9: detailed information on the C-T-P network obtained from Cytoscape. [file 5591402.f1.zip › 5591402.f1/Supplementary File S6.pdf]

## Top 10 GO\_BP

| geneSet         | GO:1901700                             | GO:1901701                                      | GO:0006915        | GO:0010035                      | GO:0010941               | GO:0042981                      | GO:0043067                          | GO:0010647                                | GO:0023056                       | GO:0008283         |
|-----------------|----------------------------------------|-------------------------------------------------|-------------------|---------------------------------|--------------------------|---------------------------------|-------------------------------------|-------------------------------------------|----------------------------------|--------------------|
| description     | response to oxygen-containing compound | cellular response to oxygen-containing compound | apoptotic process | response to inorganic substance | regulation of cell death | regulation of apoptotic process | regulation of programmed cell death | positive regulation of cell communication | positive regulation of signaling | cell proliferation |
| size            | 1556                                   | 1074                                            | 1912              | 536                             | 1649                     | 1517                            | 1531                                | 1733                                      | 1739                             | 1986               |
| overlap         | 32                                     | 27                                              | 31                | 19                              | 28                       | 27                              | 27                                  | 28                                        | 28                               | 29                 |
| expect          | 4.854914197                            | 3.351014041                                     | 5.965678627       | 1.6723869                       | 5.145085803              | 4.73322933                      | 4.776911076                         | 5.407176287                               | 5.425897036                      | 6.19656786         |
| enrichmentRatio | 6.59125964                             | 8.05726257                                      | 5.196391213       | 11.3610075                      | 5.442086113              | 5.70435069                      | 5.652188112                         | 5.17830352                                | 5.160437033                      | 4.68001007         |
| pValue          | 0                                      | 0                                               | 1.11E-16          | 8.88E-16                        | 2.44E-15                 | 3.22E-15                        | 4.00E-15                            | 8.66E-15                                  | 9.33E-15                         | 2.98E-14           |
| FDR             | 0                                      | 0                                               | 3.36E-13          | 2.02E-12                        | 4.44E-12                 | 4.88E-12                        | 5.19E-12                            | 9.42E-12                                  | 9.42E-12                         | 2.62E-11           |
| gene symbol     | MMP2                                   | MMP2                                            | XDH               | MET                             | XDH                      | XDH                             | XDH                                 | XDH                                       | XDH                              | MMP2               |
|                 | MET                                    | MET                                             | MET               | CYP1A1                          | MET                      | MET                             | MET                                 | MET                                       | MET                              | XDH                |
|                 | PRKCB                                  | PRKCB                                           | PRKCB             | MMP3                            | GSK3B                    | GSK3B                           | GSK3B                               | PRKCB                                     | PRKCB                            | MET                |
|                 | CYP1A1                                 | AHR                                             | AHR               | EGFR                            | MMP3                     | EGFR                            | EGFR                                | CYP19A1                                   | CYP19A1                          | CYP1A1             |
|                 | AHR                                    | GSK3B                                           | GSK3B             | PON1                            | EGFR                     | PIK3R1                          | PIK3R1                              | GSK3B                                     | GSK3B                            | AHR                |
|                 | GSK3B                                  | MMP3                                            | EGFR              | ALOX15                          | PIK3R1                   | CSNK2A1                         | CSNK2A1                             | EGFR                                      | EGFR                             | EGFR               |
|                 | MMP3                                   | EGFR                                            | PIK3R1            | MPO                             | CSNK2A1                  | MPO                             | MPO                                 | PIK3R1                                    | PIK3R1                           | TYR                |
|                 | EGFR                                   | PIK3R1                                          | CSNK2A1           | CYP1A2                          | MPO                      | PIK3CG                          | PIK3CG                              | CSNK2A1                                   | CSNK2A1                          | CSNK2A1            |
|                 | TYR                                    | MPO                                             | CHEK1             | RELA                            | PIK3CG                   | TOP2A                           | TOP2A                               | ALOX15                                    | ALOX15                           | RXRA               |
|                 | PIK3R1                                 | PIK3CG                                          | MPO               | HIF1A                           | TOP2A                    | RELA                            | RELA                                | PIK3CG                                    | PIK3CG                           | ACHE               |
|                 | RXRA                                   | RELA                                            | PIK3CG            | AKT1                            | RELA                     | HIF1A                           | HIF1A                               | RELA                                      | RELA                             | PIK3CG             |
|                 | PON1                                   | HIF1A                                           | TOP2A             | APP                             | HIF1A                    | INSR                            | INSR                                | HIF1A                                     | HIF1A                            | RELA               |
|                 | MPO                                    | INSR                                            | RELA              | PTGS2                           | INSR                     | AKT1                            | AKT1                                | INSR                                      | INSR                             | HIF1A              |
|                 | CYP1A2                                 | AKT1                                            | HIF1A             | APEX1                           | AKT1                     | AR                              | AR                                  | AKT1                                      | AKT1                             | INSR               |
|                 | PIK3CG                                 | AR                                              | INSR              | AKR1B1                          | AR                       | HSPB1                           | HSPB1                               | AR                                        | AR                               | AKT1               |
|                 | RELA                                   | APP                                             | AKT1              | CYP1B1                          | HSPB1                    | PTGS2                           | PTGS2                               | APP                                       | APP                              | AR                 |

|                 |                    |                              |                         |            |                  |                                                |             |                                 |                  |                       |
|-----------------|--------------------|------------------------------|-------------------------|------------|------------------|------------------------------------------------|-------------|---------------------------------|------------------|-----------------------|
|                 | HIF1A              | PTGS2                        | AR                      | PARP1      | PTGS2            | ESR1                                           | ESR1        | F2                              | F2               | APP                   |
|                 | INSR               | ESR1                         | APP                     | HSF1       | ESR1             | APEX1                                          | APEX1       | PTGS2                           | PTGS2            | F2                    |
|                 | AKT1               | APEX1                        | HSPB1                   | MMP9       | APEX1            | AKR1B1                                         | AKR1B1      | ESR1                            | ESR1             | PTGS2                 |
|                 | AR                 | AKR1B1                       | PTGS2                   |            | AKR1B1           | CYP1B1                                         | CYP1B1      | GPR35                           | GPR35            | ESR1                  |
|                 | APP                | CYP1B1                       | ESR1                    |            | CYP1B1           | E2F1                                           | E2F1        | AKR1B1                          | AKR1B1           | AKR1B1                |
|                 | PTGS2              | E2F1                         | APEX1                   |            | E2F1             | PIM1                                           | PIM1        | CYP1B1                          | CYP1B1           | CYP1B1                |
|                 | ESR1               | PIM1                         | AKR1B1                  |            | PIM1             | PARP1                                          | PARP1       | E2F1                            | E2F1             | E2F1                  |
|                 | APEX1              | PARP1                        | CYP1B1                  |            | PARP1            | HSF1                                           | HSF1        | PARP1                           | PARP1            | PIM1                  |
|                 | AKR1B1             | HSF1                         | E2F1                    |            | HSF1             | BAX                                            | BAX         | HSF1                            | HSF1             | HSF1                  |
|                 | CYP1B1             | PRKCA                        | PIM1                    |            | BAX              | PRKCA                                          | PRKCA       | BAX                             | BAX              | PTGS1                 |
|                 | E2F1               | MMP9                         | PARP1                   |            | PRKCA            | MMP9                                           | MMP9        | PRKCA                           | PRKCA            | BAX                   |
|                 | PIM1               |                              | HSF1                    |            | MMP9             |                                                |             | MMP9                            | MMP9             | PRKCA                 |
|                 | PARP1              |                              | BAX                     |            |                  |                                                |             |                                 |                  | MMP9                  |
|                 | HSF1               |                              | PRKCA                   |            |                  |                                                |             |                                 |                  |                       |
|                 | PRKCA              |                              | MMP9                    |            |                  |                                                |             |                                 |                  |                       |
|                 | MMP9               |                              |                         |            |                  |                                                |             |                                 |                  |                       |
|                 |                    |                              |                         |            |                  |                                                |             |                                 |                  |                       |
| Top 10 GO_CC    |                    |                              |                         |            |                  |                                                |             |                                 |                  |                       |
| geneSet         | GO:0000228         | GO:0005667                   | GO:0044454              | GO:0005694 | GO:0044427       | GO:0097651                                     | GO:0000785  | GO:0048471                      | GO:0043235       | GO:0005783            |
| description     | nuclear chromosome | transcription factor complex | nuclear chromosome part | chromosome | chromosomal part | phosphatidylinositol 3-kinase complex, class I | chromatin   | perinuclear region of cytoplasm | receptor complex | endoplasmic reticulum |
| size            | 573                | 355                          | 535                     | 1014       | 886              | 5                                              | 509         | 684                             | 396              | 1861                  |
| overlap         | 11                 | 8                            | 9                       | 12         | 11               | 2                                              | 8           | 9                               | 7                | 15                    |
| expect          | 1.660775176        | 1.028927029                  | 1.550636508             | 2.9389634  | 2.567969993      | 0.01449193                                     | 1.475278472 | 1.982496022                     | 1.147760855      | 5.39389634            |
| enrichmentRatio | 6.623413065        | 7.775089754                  | 5.804068169             | 4.08307228 | 4.283539149      | 138.007843                                     | 5.422705035 | 4.539731682                     | 6.098831452      | 2.78092107            |
| pValue          | 5.79E-07           | 7.58E-06                     | 2.02E-05                | 2.46E-05   | 3.70E-05         | 8.19E-05                                       | 9.89E-05    | 1.35E-04                        | 1.37E-04         | 1.74E-04              |

|              |                              |                           |                               |                         |              |                              |                           |                                                                                      |                      |                  |
|--------------|------------------------------|---------------------------|-------------------------------|-------------------------|--------------|------------------------------|---------------------------|--------------------------------------------------------------------------------------|----------------------|------------------|
| FDR          | 6.80E-04                     | 0.004452046               | 0.007240347                   | 0.00724035              | 0.008698873  | 0.01603994                   | 0.016599301               | 0.017848066                                                                          | 0.017848066          | 0.02039898       |
| gene symbol  | CSNK2A1                      | AHR                       | CSNK2A1                       | CSNK2A1                 | CSNK2A1      | PIK3R1                       | CSNK2A1                   | EGFR                                                                                 | MET                  | XDH              |
|              | RXRA                         | RXRA                      | RXRA                          | RXRA                    | RXRA         | PIK3CG                       | RXRA                      | TYR                                                                                  | AHR                  | CYP1A1           |
|              | CHEK1                        | RELA                      | RELA                          | CHEK1                   | CHEK1        |                              | CHEK1                     | PIK3R1                                                                               | EGFR                 | CYP19A1          |
|              | TOP2A                        | HIF1A                     | AR                            | TOP2A                   | RELA         |                              | RELA                      | ACHE                                                                                 | RXRA                 | EGFR             |
|              | RELA                         | NR1I2                     | ESR1                          | RELA                    | AR           |                              | AR                        | APP                                                                                  | ABCG2                | PIK3R1           |
|              | AR                           | APEX1                     | APEX1                         | AR                      | ESR1         |                              | ESR1                      | APEX1                                                                                | INSR                 | CYP1A2           |
|              | ESR1                         | E2F1                      | E2F1                          | ESR1                    | APEX1        |                              | E2F1                      | AKR1B1                                                                               | APP                  | CYP3A4           |
|              | APEX1                        | PARP1                     | PARP1                         | APEX1                   | E2F1         |                              | HSF1                      | HSF1                                                                                 |                      | APP              |
|              | E2F1                         |                           | TOP1                          | E2F1                    | PARP1        |                              |                           | PRKCA                                                                                |                      | F2               |
|              | PARP1                        |                           |                               | PARP1                   | HSF1         |                              |                           |                                                                                      |                      | PTGS2            |
|              | TOP1                         |                           |                               | HSF1                    | TOP1         |                              |                           |                                                                                      |                      | APEX1            |
|              |                              |                           |                               | TOP1                    |              |                              |                           |                                                                                      |                      | CYP1B1           |
|              |                              |                           |                               |                         |              |                              |                           |                                                                                      |                      | PTGS1            |
|              |                              |                           |                               |                         |              |                              |                           |                                                                                      |                      | BAX              |
|              |                              |                           |                               |                         |              |                              |                           |                                                                                      |                      | PRKCA            |
|              |                              |                           |                               |                         |              |                              |                           |                                                                                      |                      |                  |
| Top 10 GO_MF |                              |                           |                               |                         |              |                              |                           |                                                                                      |                      |                  |
| geneSet      | GO:0046914                   | GO:0042802                | GO:0046983                    | GO:0016491              | GO:0020037   | GO:0008134                   | GO:0004879                | GO:0098531                                                                           | GO:0046906           | GO:0005506       |
| description  | transition metal ion binding | identical protein binding | protein dimerization activity | oxidoreductase activity | heme binding | transcription factor binding | nuclear receptor activity | transcription factor activity, direct ligand regulated sequence-specific DNA binding | tetrapyrrole binding | iron ion binding |
| size         | 1058                         | 1696                      | 1270                          | 731                     | 128          | 638                          | 48                        | 48                                                                                   | 138                  | 148              |
| overlap      | 22                           | 22                        | 19                            | 15                      | 8            | 14                           | 6                         | 6                                                                                    | 8                    | 8                |
| expect       | 3.300101973                  | 5.29014456                | 3.96137004                    | 2.28012717              | 0.39925619   | 1.99004259                   | 0.14972107                | 0.149721073                                                                          | 0.43044808           | 0.4616399        |

|                 |             |             |             |            |             |            |             |             |             |            |
|-----------------|-------------|-------------|-------------|------------|-------------|------------|-------------|-------------|-------------|------------|
|                 |             | 2           | 4           |            | 3           |            | 3           |             | 3           | 7          |
| enrichmentRatio | 6.666460666 | 4.158676524 | 4.796320412 | 6.57858045 | 20.03725962 | 7.03502532 | 40.07451923 | 40.07451923 | 18.58528428 | 17.3295218 |
| pValue          | 1.58E-13    | 1.69E-09    | 3.35E-09    | 3.64E-09   | 5.49E-09    | 5.78E-09   | 7.59E-09    | 7.59E-09    | 9.95E-09    | 1.73E-08   |
| FDR             | 2.97E-10    | 1.59E-06    | 1.71E-06    | 1.71E-06   | 1.78E-06    | 1.78E-06   | 1.78E-06    | 1.78E-06    | 2.08E-06    | 3.24E-06   |
| gene symbol     | MMP2        | XDH         | XDH         | XDH        | CYP1A1      | PRKCB      | AHR         | AHR         | CYP1A1      | XDH        |
|                 | XDH         | MET         | AHR         | CYP1A1     | CYP19A1     | AHR        | RXRA        | RXRA        | CYP19A1     | CYP1A1     |
|                 | PRKCB       | AHR         | EGFR        | CYP19A1    | MPO         | GSK3B      | NR1I2       | NR1I2       | MPO         | CYP19A1    |
|                 | CYP1A1      | EGFR        | TYR         | TYR        | CYP1A2      | PIK3R1     | AR          | AR          | CYP1A2      | ALOX15     |
|                 | CYP19A1     | TYR         | PIK3R1      | ALOX15     | CYP3A4      | RXRA       | ESR1        | ESR1        | CYP3A4      | CYP1A2     |
|                 | MMP3        | CSNK2A1     | RXRA        | MPO        | PTGS2       | RELA       | ESR2        | ESR2        | PTGS2       | CYP3A4     |
|                 | TYR         | PON1        | PON1        | CYP1A2     | CYP1B1      | HIF1A      |             |             | CYP1B1      | CYP1B1     |
|                 | RXRA        | ACHE        | ACHE        | CYP3A4     | PTGS1       | NR1I2      |             |             | PTGS1       | ALOX5      |
|                 | ALOX15      | ABCG2       | ABCG2       | CBR1       |             | AR         |             |             |             |            |
|                 | CYP1A2      | PIK3CG      | TOP2A       | PTGS2      |             | ESR1       |             |             |             |            |
|                 | NR1I2       | TOP2A       | RELA        | APEX1      |             | APEX1      |             |             |             |            |
|                 | AR          | RELA        | HIF1A       | AKR1B1     |             | E2F1       |             |             |             |            |
|                 | CYP3A4      | AKT1        | AKT1        | CYP1B1     |             | PIM1       |             |             |             |            |
|                 | APP         | APP         | AR          | ALOX5      |             | PARP1      |             |             |             |            |
|                 | ESR1        | HSPB1       | HSPB1       | PTGS1      |             |            |             |             |             |            |
|                 | ESR2        | PTGS2       | PTGS2       |            |             |            |             |             |             |            |
|                 | CYP1B1      | ESR1        | E2F1        |            |             |            |             |             |             |            |
|                 | ALOX5       | ESR2        | HSF1        |            |             |            |             |             |             |            |
|                 | PIM1        | PARP1       | BAX         |            |             |            |             |             |             |            |
|                 | PARP1       | HSF1        |             |            |             |            |             |             |             |            |
|                 | PRKCA       | BAX         |             |            |             |            |             |             |             |            |
|                 | MMP9        | MMP9        |             |            |             |            |             |             |             |            |
