# Supplementary material for: Pharmacological Mechanisms Underlying the Hepatoprotective Effects of Ecliptae herba on Hepatocellular Carcinoma
Source: Evid Based Complement Alternat Med. 2021 Jul 16;2021:5591402. doi: 10.1155/2021/5591402 (PMC8302389; doi:10.1155/2021/5591402)
Supplement: Supplementary Materials — Supplementary File S1: a total of 48 chemical ingredients of EH were obtained from TCMSP. Supplementary File S2: detailed information of the targets of 6 active ingredients in EH was extracted from three databases, TCMSP, DGIDB, and SwissTargetPrediction. Supplementary File S3: detailed information on HCC-related targets was extracted from GeneCards and CTD. Supplementary File S4: detailed information on the PPI network of 52 potential therapeutic targets for HCC was obtained from the STRING platform. Supplementary File S5: topological parameters of nodes in the E-H network obtained from Cytoscape. Supplementary File S6: detailed information on GO enrichment analysis obtained from WebGestalt. Supplementary File S7: detailed information on the top 10 GO terms of the GO network in the TCGA RNASeq LIHC database through Network Topology-based Analysis obtained from WebGestalt. Supplementary File S8: detailed information on the top 20 KEGG enrichment pathways obtained from the WebGestalt. Supplementary File S9: detailed information on the C-T-P network obtained from Cytoscape. [file 5591402.f1.zip › 5591402.f1/Supplementary File S7.pdf]

Detailed information of top 10 GO terms of GO network in the TCGA RNASeq LIHC database through Network Topology-based Analysis

| GO ID      | description                                | size | overlap | interestGene                                                                                                          | expect   | enrichmentRatio | pValue   | FDR         |
|------------|--------------------------------------------|------|---------|-----------------------------------------------------------------------------------------------------------------------|----------|-----------------|----------|-------------|
| GO:0042759 | long-chain fatty acid biosynthetic process | 21   | 5       | ALOX5 1;ALOX15 1;CYP1A1 1;CYP1A2 1;CYP3A4 1                                                                           | 0.055301 | 90.41408        | 1.57E-09 | 2.28E-05    |
| GO:001676  | long-chain fatty acid metabolic process    | 84   | 6       | ALOX5 1;ALOX15 1;CYP1A1 1;CYP1A2 1;CYP3A4 1;PTGS1 1                                                                   | 0.221204 | 27.12422        | 5.85E-08 | 2.84E-04    |
| GO:006629  | lipid metabolic process                    | 901  | 13      | ACHE 1;ALOX5 1;ALOX15 1;CYP1A1 1;CYP1A2 1;CYP3A4 1;CYP19A1 1;MET 1;PTGS1 1;HSD17B11 0;GAL3ST4 0;CYP27C1 0;TNFAIP8L3 0 | 2.372681 | 5.479033        | 5.89E-08 | 2.84E-04    |
| GO:008610  | lipid biosynthetic process                 | 457  | 10      | ACHE 1;ALOX5 1;ALOX15 1;CYP1A1 1;CYP1A2 1;CYP3A4 1;CYP19A1 1;PTGS1 1;HSD17B11 0;GAL3ST4 0                             | 1.203458 | 8.30939         | 8.63E-08 | 3.12E-04    |
| GO:006706  | steroid catabolic process                  | 19   | 4       | CYP1A2 1;CYP3A4 1;CYP19A1 1;HSD17B11 0                                                                                | 0.050034 | 79.94508        | 1.38E-07 | 4.00E-04    |
| GO:006633  | fatty acid biosynthetic process            | 110  | 6       | ALOX5 1;ALOX15 1;CYP1A1 1;CYP1A2 1;CYP3A4 1;PTGS1 1                                                                   | 0.289673 | 20.71304        | 2.95E-07 | 7.12E-04    |
| GO:0044255 | cellular lipid metabolic process           | 684  | 11      | ACHE 1;ALOX5 1;ALOX15 1;CYP1A1 1;CYP1A2 1;CYP3A4 1;MET 1;PTGS1 1;GAL3ST4 0;CYP27C1 0;TNFAIP8L3 0                      | 1.801237 | 6.106916        | 3.55E-07 | 7.33E-04    |
| GO:0042445 | hormone metabolic process                  | 137  | 6       | ACHE 1;CYP1A1 1;CYP3A4 1;CYP19A1 1;HSD17B11 0;CYP27C1 0                                                               | 0.360774 | 16.63091        | 1.08E-06 | 0.001958794 |
| GO:006690  | icosanoid metabolic process                | 77   | 5       | ALOX5 1;ALOX15 1;CYP1A1 1;CYP1A2 1;PTGS1 1                                                                            | 0.202771 | 24.65839        | 1.39E-06 | 0.00223392  |
| GO:0034754 | cellular hormone metabolic process         | 84   | 5       | CYP1A1 1;CYP3A4 1;CYP19A1 1;HSD17B11 0;CYP27C1 0                                                                      | 0.221204 | 22.60352        | 2.14E-06 | 0.003000318 |
