# Supplementary material for: Pharmacological Mechanisms Underlying the Hepatoprotective Effects of Ecliptae herba on Hepatocellular Carcinoma
Source: Evid Based Complement Alternat Med. 2021 Jul 16;2021:5591402. doi: 10.1155/2021/5591402 (PMC8302389; doi:10.1155/2021/5591402)
Supplement: Supplementary Materials — Supplementary File S1: a total of 48 chemical ingredients of EH were obtained from TCMSP. Supplementary File S2: detailed information of the targets of 6 active ingredients in EH was extracted from three databases, TCMSP, DGIDB, and SwissTargetPrediction. Supplementary File S3: detailed information on HCC-related targets was extracted from GeneCards and CTD. Supplementary File S4: detailed information on the PPI network of 52 potential therapeutic targets for HCC was obtained from the STRING platform. Supplementary File S5: topological parameters of nodes in the E-H network obtained from Cytoscape. Supplementary File S6: detailed information on GO enrichment analysis obtained from WebGestalt. Supplementary File S7: detailed information on the top 10 GO terms of the GO network in the TCGA RNASeq LIHC database through Network Topology-based Analysis obtained from WebGestalt. Supplementary File S8: detailed information on the top 20 KEGG enrichment pathways obtained from the WebGestalt. Supplementary File S9: detailed information on the C-T-P network obtained from Cytoscape. [file 5591402.f1.zip › 5591402.f1/Supplementary File S8.pdf]

|                 |                                   |                          |                                 |                        |                        |                                                 |             |               |                |                             |
|-----------------|-----------------------------------|--------------------------|---------------------------------|------------------------|------------------------|-------------------------------------------------|-------------|---------------|----------------|-----------------------------|
|                 | PIM1                              |                          |                                 |                        |                        |                                                 |             |               |                |                             |
|                 | BAX                               |                          |                                 |                        |                        |                                                 |             |               |                |                             |
|                 | PRKCA                             |                          |                                 |                        |                        |                                                 |             |               |                |                             |
|                 | MMP9                              |                          |                                 |                        |                        |                                                 |             |               |                |                             |
|                 |                                   |                          |                                 |                        |                        |                                                 |             |               |                |                             |
| geneSet         | hsa04919                          | hsa05225                 | hsa05163                        | hsa04370               | hsa05222               | hsa05167                                        | hsa05161    | hsa05224      | hsa05226       | hsa04917                    |
| description     | Thyroid hormone signaling pathway | Hepatocellular carcinoma | Human cytomegalovirus infection | VEGF signaling pathway | Small cell lung cancer | Kaposi sarcoma-associated herpesvirus infection | Hepatitis B | Breast cancer | Gastric cancer | Prolactin signaling pathway |
| size            | 116                               | 168                      | 225                             | 59                     | 93                     | 186                                             | 144         | 147           | 149            | 70                          |
| overlap         | 8                                 | 9                        | 10                              | 6                      | 7                      | 9                                               | 8           | 8             | 8              | 6                           |
| expect          | 0.7610122                         | 1.102155576              | 1.4761012                       | 0.38706654             | 0.610121837            | 1.220243674                                     | 0.94470478  | 0.964386      | 0.97750703     | 0.45923149                  |
| enrichmentRatio | 10.512315                         | 8.165816327              | 6.7746032                       | 15.5012107             | 11.47311828            | 7.375576037                                     | 8.468253968 | 8.295432      | 8.18408437     | 13.06530612                 |
| pValue          | 7.04E-07                          | 1.13E-06                 | 1.48E-06                        | 2.01E-06               | 2.07E-06               | 2.64E-06                                        | 3.63E-06    | 4.24E-06      | 4.69E-06       | 5.55E-06                    |
| FDR             | 2.09E-05                          | 3.07E-05                 | 3.71E-05                        | 4.51E-05               | 4.51E-05               | 5.38E-05                                        | 6.97E-05    | 7.68E-05      | 8.05E-05       | 9.05E-05                    |
| Gene symbol     | PRKCB                             | MET                      | PRKCB                           | PRKCB                  | PIK3R1                 | GSK3B                                           | PRKCB       | GSK3B         | MET            | GSK3B                       |
|                 | GSK3B                             | PRKCB                    | GSK3B                           | PIK3R1                 | RXRA                   | PIK3R1                                          | PIK3R1      | EGFR          | GSK3B          | PIK3R1                      |
|                 | PIK3R1                            | GSK3B                    | EGFR                            | AKT1                   | RELA                   | PIK3CG                                          | RELA        | PIK3R1        | EGFR           | RELA                        |
|                 | RXRA                              | EGFR                     | PIK3R1                          | HSPB1                  | AKT1                   | RELA                                            | AKT1        | AKT1          | PIK3R1         | AKT1                        |
|                 | HIF1A                             | PIK3R1                   | RELA                            | PTGS2                  | PTGS2                  | HIF1A                                           | E2F1        | ESR1          | RXRA           | ESR1                        |
|                 | AKT1                              | AKT1                     | AKT1                            | PRKCA                  | E2F1                   | AKT1                                            | BAX         | ESR2          | AKT1           | ESR2                        |
|                 | ESR1                              | E2F1                     | PTGS2                           |                        | BAX                    | PTGS2                                           | PRKCA       | E2F1          | E2F1           |                             |
|                 | PRKCA                             | BAX                      | E2F1                            |                        |                        | E2F1                                            | MMP9        | BAX           | BAX            |                             |
|                 |                                   | PRKCA                    | BAX                             |                        |                        | BAX                                             |             |               |                |                             |
|                 |                                   |                          | PRKCA                           |                        |                        |                                                 |             |               |                |                             |
