# Supplementary material for: Pharmacological Mechanisms Underlying the Hepatoprotective Effects of Ecliptae herba on Hepatocellular Carcinoma
Source: Evid Based Complement Alternat Med. 2021 Jul 16;2021:5591402. doi: 10.1155/2021/5591402 (PMC8302389; doi:10.1155/2021/5591402)
Supplement: Supplementary Materials — Supplementary File S1: a total of 48 chemical ingredients of EH were obtained from TCMSP. Supplementary File S2: detailed information of the targets of 6 active ingredients in EH was extracted from three databases, TCMSP, DGIDB, and SwissTargetPrediction. Supplementary File S3: detailed information on HCC-related targets was extracted from GeneCards and CTD. Supplementary File S4: detailed information on the PPI network of 52 potential therapeutic targets for HCC was obtained from the STRING platform. Supplementary File S5: topological parameters of nodes in the E-H network obtained from Cytoscape. Supplementary File S6: detailed information on GO enrichment analysis obtained from WebGestalt. Supplementary File S7: detailed information on the top 10 GO terms of the GO network in the TCGA RNASeq LIHC database through Network Topology-based Analysis obtained from WebGestalt. Supplementary File S8: detailed information on the top 20 KEGG enrichment pathways obtained from the WebGestalt. Supplementary File S9: detailed information on the C-T-P network obtained from Cytoscape. [file 5591402.f1.zip › 5591402.f1/Supplementary File S9.pdf]

## Detailed information of C-T-P network obtained from Cytoscape

| S<br>U<br>I<br>D | AverageShortestPathLength | BetweennessCentrality | ClosenessCentrality | ClusteringCoefficient | Degree | Eccentricity | IsSingleNode | name               | NeighborhoodConnectivity | NumberOfDirectedEdges | NumberOfUndirectedEdges | PartnerOfMultiEdgedNodePairs | Radiality | selected | SelfLoops | shared name        | Str<br>es<br>s | TopologicalCoefficient | Type     |
|------------------|---------------------------|-----------------------|---------------------|-----------------------|--------|--------------|--------------|--------------------|--------------------------|-----------------------|-------------------------|------------------------------|-----------|----------|-----------|--------------------|----------------|------------------------|----------|
| 309              | 1.644737                  | 0.568954              | 0.608               | 0                     | 40     | 4            | FALSE        | quercetin          | 4.725                    | 40                    | 0                       | 0                            | 0.892544  | FALSE    | 0         | quercetin          | 29718          | 0.15520833             | compound |
| 91               | 1.868421                  | 0.088409              | 0.535211            | 0                     | 21     | 4            | FALSE        | AKT1               | 10.38095                 | 21                    | 0                       | 0                            | 0.855263  | FALSE    | 0         | AKT1               | 10582          | 0.19959473             | gene     |
| 83               | 1.947368                  | 0.068371              | 0.513514            | 0                     | 20     | 4            | FALSE        | PIK3R1             | 10.25                    | 20                    | 0                       | 0                            | 0.842105  | FALSE    | 0         | PIK3R1             | 8488           | 0.20555556             | gene     |
| 72               | 2.171053                  | 0.091785              | 0.460606            | 0                     | 19     | 3            | FALSE        | Pathways in cancer | 10.10526                 | 19                    | 0                       | 0                            | 0.804825  | FALSE    | 0         | Pathways in cancer | 13002          | 0.36421053             | pathway  |
| 81               | 2.052632                  | 0.04523               | 0.487179            | 0                     | 14     | 4            | FALSE        | EGFR               | 11.85714                 | 14                    | 0                       | 0                            | 0.824561  | FALSE    | 0         | EGFR               | 5646           | 0.23100304             | gene     |
| 105              | 2.105263                  | 0.035486              | 0.475               | 0                     | 14     | 4            | FALSE        | BAX                | 11.28571                 | 14                    | 0                       | 0                            | 0.815789  | FALSE    | 0         | BAX                | 4510           | 0.22857143             | gene     |
| 7                | 2.131579                  | 0.0313                | 0.469               | 0                     | 13     | 4            | FALSE        | PRKCB              | 11.4615                  | 13                    | 0                       | 0                            | 0.8       | FALSE    | 0         | PRKCB              | 3              | 0.2324                 | gene     |

|             |          |              |              |   |    |   |           |                                           |              |    |   |   |                      |               |   |                                           |                  |                |                      |
|-------------|----------|--------------|--------------|---|----|---|-----------|-------------------------------------------|--------------|----|---|---|----------------------|---------------|---|-------------------------------------------|------------------|----------------|----------------------|
| 7           |          | 01           | 136          |   |    |   | SE        |                                           | 4            |    |   |   | 11<br>40<br>4        | LS<br>E       |   |                                           | 8<br>4<br>8      | 7863           | e                    |
| 1<br>0<br>1 | 2.131579 | 0.0326<br>55 | 0.469<br>136 | 0 | 13 | 4 | FAL<br>SE | E2F1                                      | 11.6153<br>8 | 13 | 0 | 0 | 0.8<br>11<br>40<br>4 | FA<br>LS<br>E | 0 | E2F1                                      | 4<br>1<br>8<br>6 | 0.2358<br>9744 | gen<br>e             |
| 1<br>0<br>7 | 2.131579 | 0.0313<br>01 | 0.469<br>136 | 0 | 13 | 4 | FAL<br>SE | PRKCA                                     | 11.4615<br>4 | 13 | 0 | 0 | 0.8<br>11<br>40<br>4 | FA<br>LS<br>E | 0 | PRKCA                                     | 3<br>8<br>4<br>8 | 0.2324<br>7863 | gen<br>e             |
| 2<br>9<br>0 | 2.486842 | 0.0790<br>07 | 0.402<br>116 | 0 | 13 | 5 | FAL<br>SE | luteolin                                  | 6.53846<br>2 | 13 | 0 | 0 | 0.7<br>52<br>19<br>3 | FA<br>LS<br>E | 0 | luteolin                                  | 7<br>0<br>1<br>2 | 0.2517<br>4825 | co<br>mp<br>oun<br>d |
| 7<br>9      | 2.789474 | 0.0312<br>72 | 0.358<br>491 | 0 | 12 | 4 | FAL<br>SE | GSK3B                                     | 8.41666<br>7 | 12 | 0 | 0 | 0.7<br>01<br>75<br>4 | FA<br>LS<br>E | 0 | GSK3B                                     | 4<br>1<br>4<br>6 | 0.3531<br>746  | gen<br>e             |
| 8<br>7      | 2.131579 | 0.0337<br>31 | 0.469<br>136 | 0 | 11 | 4 | FAL<br>SE | RELA                                      | 12.4545<br>5 | 11 | 0 | 0 | 0.8<br>11<br>40<br>4 | FA<br>LS<br>E | 0 | RELA                                      | 3<br>8<br>8<br>8 | 0.2437<br>1373 | gen<br>e             |
| 1<br>7<br>7 | 2.460526 | 0.0157<br>74 | 0.406<br>417 | 0 | 10 | 4 | FAL<br>SE | Proteogl<br>ycans in<br>cancer            | 11.6         | 10 | 0 | 0 | 0.7<br>56<br>57<br>9 | FA<br>LS<br>E | 0 | Proteogl<br>ycans in<br>cancer            | 2<br>8<br>2<br>2 | 0.4608<br>6957 | pat<br>hwa<br>y      |
| 2<br>1<br>8 | 2.513158 | 0.0100<br>61 | 0.397<br>906 | 0 | 10 | 5 | FAL<br>SE | Human<br>cytomeg<br>alovirus<br>infection | 13.8         | 10 | 0 | 0 | 0.7<br>47<br>80<br>7 | FA<br>LS<br>E | 0 | Human<br>cytomeg<br>alovirus<br>infection | 2<br>3<br>0<br>6 | 0.5565<br>2174 | pat<br>hwa<br>y      |
| 1<br>2      | 2.565789 | 0.0154<br>58 | 0.389<br>744 | 0 | 9  | 5 | FAL<br>SE | Prostate<br>cancer                        | 11.5555<br>6 | 9  | 0 | 0 | 0.7<br>39            | FA<br>LS      | 0 | Prostate<br>cancer                        | 2<br>2           | 0.4797<br>9798 | pat<br>hwa           |

|             |          |              |              |   |   |   |           |                                                                          |              |   |   |   |                      |               |   |                                                                          |                  |                |                 |
|-------------|----------|--------------|--------------|---|---|---|-----------|--------------------------------------------------------------------------|--------------|---|---|---|----------------------|---------------|---|--------------------------------------------------------------------------|------------------|----------------|-----------------|
| 0           |          |              |              |   |   |   |           |                                                                          |              |   |   |   | 03<br>5              | E             |   |                                                                          | 0<br>2           |                | y               |
| 1<br>3<br>1 | 2.486842 | 0.0140<br>27 | 0.402<br>116 | 0 | 9 | 4 | FAL<br>SE | Endocrin<br>e<br>resistanc<br>e                                          | 12.4444<br>4 | 9 | 0 | 0 | 0.7<br>52<br>19<br>3 | FA<br>LS<br>E | 0 | Endocrin<br>e<br>resistanc<br>e                                          | 2<br>6<br>8<br>4 | 0.4975<br>8454 | pat<br>hwa<br>y |
| 2<br>0<br>8 | 2.565789 | 0.0075<br>68 | 0.389<br>744 | 0 | 9 | 5 | FAL<br>SE | Hepatoc<br>ellular<br>carcinom<br>a                                      | 14           | 9 | 0 | 0 | 0.7<br>39<br>03<br>5 | FA<br>LS<br>E | 0 | Hepatoc<br>ellular<br>carcinom<br>a                                      | 1<br>8<br>3<br>8 | 0.5909<br>0909 | pat<br>hwa<br>y |
| 2<br>4<br>5 | 2.539474 | 0.0138<br>16 | 0.393<br>782 | 0 | 9 | 5 | FAL<br>SE | Kaposi<br>sarcoma<br>-<br>associate<br>d<br>herpesvir<br>us<br>infection | 11.7777<br>8 | 9 | 0 | 0 | 0.7<br>43<br>42<br>1 | FA<br>LS<br>E | 0 | Kaposi<br>sarcoma<br>-<br>associate<br>d<br>herpesvir<br>us<br>infection | 2<br>1<br>5<br>4 | 0.4685<br>9903 | pat<br>hwa<br>y |
| 9<br>7      | 2.894737 | 0.0311<br>79 | 0.345<br>455 | 0 | 8 | 4 | FAL<br>SE | ESR1                                                                     | 8.5          | 8 | 0 | 0 | 0.6<br>84<br>21<br>1 | FA<br>LS<br>E | 0 | ESR1                                                                     | 4<br>4<br>5<br>4 | 0.3571<br>4286 | gen<br>e        |
| 1<br>0<br>9 | 2.210526 | 0.0265<br>91 | 0.452<br>381 | 0 | 8 | 4 | FAL<br>SE | MMP9                                                                     | 13.875       | 8 | 0 | 0 | 0.7<br>98<br>24<br>6 | FA<br>LS<br>E | 0 | MMP9                                                                     | 2<br>8<br>6<br>2 | 0.2739<br>3617 | gen<br>e        |
| 1<br>1<br>1 | 2.618421 | 0.0095<br>11 | 0.381<br>91  | 0 | 8 | 5 | FAL<br>SE | Non-<br>small cell<br>lung<br>cancer                                     | 14.25        | 8 | 0 | 0 | 0.7<br>30<br>26<br>3 | FA<br>LS<br>E | 0 | Non-<br>small cell<br>lung<br>cancer                                     | 1<br>7<br>5<br>4 | 0.6309<br>5238 | pat<br>hwa<br>y |
| 1<br>4<br>1 | 2.592105 | 0.0062<br>69 | 0.385<br>787 | 0 | 8 | 5 | FAL<br>SE | EGFR<br>tyrosine<br>kinase                                               | 14.125       | 8 | 0 | 0 | 0.7<br>34<br>64      | FA<br>LS<br>E | 0 | EGFR<br>tyrosine<br>kinase                                               | 1<br>5<br>3      | 0.5965<br>9091 | pat<br>hwa<br>y |

|             |          |              |              |   |   |   |                             |                                                                             |              |   |   |   |                      |               |   |                                                                             |                  |                |                 |
|-------------|----------|--------------|--------------|---|---|---|-----------------------------|-----------------------------------------------------------------------------|--------------|---|---|---|----------------------|---------------|---|-----------------------------------------------------------------------------|------------------|----------------|-----------------|
|             |          |              |              |   |   |   | inhibitor<br>resistanc<br>e |                                                                             |              |   |   |   | 9                    |               |   | inhibitor<br>resistanc<br>e                                                 | 8                |                |                 |
| 1<br>5<br>0 | 2.644737 | 0.0053<br>4  | 0.378<br>109 | 0 | 8 | 5 | FAL<br>SE                   | AGE-<br>RAGE<br>signaling<br>pathway<br>in<br>diabetic<br>complica<br>tions | 12.75        | 8 | 0 | 0 | 0.7<br>25<br>87<br>7 | FA<br>LS<br>E | 0 | AGE-<br>RAGE<br>signaling<br>pathway<br>in<br>diabetic<br>complica<br>tions | 7<br>1<br>4      | 0.5595<br>2381 | pat<br>hwa<br>y |
| 1<br>5<br>9 | 2.644737 | 0.0079<br>12 | 0.378<br>109 | 0 | 8 | 5 | FAL<br>SE                   | HIF-1<br>signaling<br>pathway                                               | 12.625       | 8 | 0 | 0 | 0.7<br>25<br>87<br>7 | FA<br>LS<br>E | 0 | HIF-1<br>signaling<br>pathway                                               | 1<br>1<br>1<br>4 | 0.5535<br>7143 | pat<br>hwa<br>y |
| 1<br>9<br>9 | 2.486842 | 0.0154<br>52 | 0.402<br>116 | 0 | 8 | 4 | FAL<br>SE                   | Thyroid<br>hormone<br>signaling<br>pathway                                  | 12.375       | 8 | 0 | 0 | 0.7<br>52<br>19<br>3 | FA<br>LS<br>E | 0 | Thyroid<br>hormone<br>signaling<br>pathway                                  | 2<br>8<br>4<br>2 | 0.4739<br>5833 | pat<br>hwa<br>y |
| 2<br>5<br>6 | 2.644737 | 0.0035<br>52 | 0.378<br>109 | 0 | 8 | 5 | FAL<br>SE                   | Hepatitis<br>B                                                              | 14.125       | 8 | 0 | 0 | 0.7<br>25<br>87<br>7 | FA<br>LS<br>E | 0 | Hepatitis<br>B                                                              | 6<br>9<br>0      | 0.625          | pat<br>hwa<br>y |
| 2<br>6<br>5 | 2.513158 | 0.0112<br>67 | 0.397<br>906 | 0 | 8 | 4 | FAL<br>SE                   | Breast<br>cancer                                                            | 13.625       | 8 | 0 | 0 | 0.7<br>47<br>80<br>7 | FA<br>LS<br>E | 0 | Breast<br>cancer                                                            | 2<br>6<br>1<br>8 | 0.5489<br>1304 | pat<br>hwa<br>y |
| 2<br>7<br>4 | 2.539474 | 0.0121<br>58 | 0.393<br>782 | 0 | 8 | 5 | FAL<br>SE                   | Gastric<br>cancer                                                           | 13.25        | 8 | 0 | 0 | 0.7<br>43<br>42<br>1 | FA<br>LS<br>E | 0 | Gastric<br>cancer                                                           | 2<br>3<br>6<br>4 | 0.5326<br>087  | pat<br>hwa<br>y |
| 7<br>3      | 2.236842 | 0.0231<br>06 | 0.447<br>059 | 0 | 7 | 4 | FAL<br>SE                   | MMP2                                                                        | 14.5714<br>3 | 7 | 0 | 0 | 0.7<br>93            | FA<br>LS      | 0 | MMP2                                                                        | 2<br>4           | 0.2887<br>538  | gen<br>e        |

|     |          |          |          |   |   |   |       |                         |          |   |   |   |          |       |   |                         |      |            |         |
|-----|----------|----------|----------|---|---|---|-------|-------------------------|----------|---|---|---|----------|-------|---|-------------------------|------|------------|---------|
|     |          |          |          |   |   |   |       |                         |          |   |   |   | 86       | E     |   |                         | 16   |            |         |
| 95  | 2.684211 | 0.017926 | 0.372549 | 0 | 7 | 4 | FALSE | PTGS2                   | 10       | 7 | 0 | 0 | 0.719298 | FALSE | 0 | PTGS2                   | 1942 | 0.3        | gene    |
| 99  | 2.210526 | 0.083675 | 0.452381 | 0 | 7 | 4 | FALSE | ESR2                    | 12.85714 | 7 | 0 | 0 | 0.798246 | FALSE | 0 | ESR2                    | 5520 | 0.24702381 | gene    |
| 169 | 2.697368 | 0.001694 | 0.370732 | 0 | 7 | 5 | FALSE | Glioma                  | 15.42857 | 7 | 0 | 0 | 0.717105 | FALSE | 0 | Glioma                  | 386  | 0.72142857 | pathway |
| 237 | 2.618421 | 0.010011 | 0.38191  | 0 | 7 | 5 | FALSE | Small cell lung cancer  | 13.14286 | 7 | 0 | 0 | 0.730263 | FALSE | 0 | Small cell lung cancer  | 1720 | 0.55194805 | pathway |
| 75  | 2.894737 | 0.005177 | 0.345455 | 0 | 6 | 4 | FALSE | MET                     | 11.16667 | 6 | 0 | 0 | 0.684211 | FALSE | 0 | MET                     | 758  | 0.44202899 | gene    |
| 85  | 3        | 0.030918 | 0.333333 | 0 | 6 | 4 | FALSE | RXRA                    | 8.666667 | 6 | 0 | 0 | 0.666667 | FALSE | 0 | RXRA                    | 4280 | 0.40350877 | gene    |
| 89  | 2.315789 | 0.011311 | 0.431818 | 0 | 6 | 4 | FALSE | HIF1A                   | 15.66667 | 6 | 0 | 0 | 0.780702 | FALSE | 0 | HIF1A                   | 1512 | 0.32592593 | gene    |
| 188 | 3.039474 | 0.006331 | 0.329004 | 0 | 6 | 5 | FALSE | Ovarian steroidogenesis | 3        | 6 | 0 | 0 | 0.66008  | FALSE | 0 | Ovarian steroidogenesis | 420  | 0.25       | pathway |

|     |          |          |          |   |   |   |       |                             |          |   |   |   |          |       |   |                             |      |            |          |
|-----|----------|----------|----------|---|---|---|-------|-----------------------------|----------|---|---|---|----------|-------|---|-----------------------------|------|------------|----------|
|     |          |          |          |   |   |   |       |                             |          |   |   |   | 8        |       |   |                             |      |            |          |
| 229 | 2.697368 | 0.006411 | 0.370732 | 0 | 6 | 5 | FALSE | VEGF signaling pathway      | 12.66667 | 6 | 0 | 0 | 0.717105 | FALSE | 0 | VEGF signaling pathway      | 872  | 0.55555556 | pathway  |
| 283 | 2.565789 | 0.007768 | 0.389744 | 0 | 6 | 4 | FALSE | Prolactin signaling pathway | 13.16667 | 6 | 0 | 0 | 0.739035 | FALSE | 0 | Prolactin signaling pathway | 178  | 0.52898551 | pathway  |
| 366 | 2.881579 | 0.027598 | 0.347032 | 0 | 4 | 5 | FALSE | wedelolactone               | 7        | 4 | 0 | 0 | 0.686404 | FALSE | 0 | wedelolactone               | 2586 | 0.4        | compound |
| 380 | 3.039474 | 0.048028 | 0.329004 | 0 | 4 | 5 | FALSE | 3'-O-Methylorobol           | 4.5      | 4 | 0 | 0 | 0.66088  | FALSE | 0 | 3'-O-Methylorobol           | 398  | 0.3888889  | compound |
| 93  | 2.947368 | 0.001693 | 0.339286 | 0 | 3 | 4 | FALSE | AR                          | 13.66667 | 3 | 0 | 0 | 0.675439 | FALSE | 0 | AR                          | 306  | 0.5277778  | gene     |
| 103 | 2.394737 | 0.003552 | 0.417582 | 0 | 3 | 4 | FALSE | PIM1                        | 22.33333 | 3 | 0 | 0 | 0.767544 | FALSE | 0 | PIM1                        | 550  | 0.47407407 | gene     |
| 165 | 2.552632 | 0.005189 | 0.391753 | 0 | 3 | 5 | FALSE | INSR                        | 18       | 3 | 0 | 0 | 0.741228 | FALSE | 0 | INSR                        | 514  | 0.425      | gene     |
| 372 | 2.855263 | 0.001149 | 0.35023  | 0 | 3 | 5 | FALSE | demethylwedelolactone       | 9        | 3 | 0 | 0 | 0.690789 | FALSE | 0 | demethylwedelolactone       | 226  | 0.47058824 | compound |

|             |          |              |              |   |   |   |           |         |      |   |   |   |                      |               |   |         |             |                |          |
|-------------|----------|--------------|--------------|---|---|---|-----------|---------|------|---|---|---|----------------------|---------------|---|---------|-------------|----------------|----------|
| 1<br>2<br>2 | 2.552632 | 0.0017<br>56 | 0.391<br>753 | 0 | 2 | 5 | FAL<br>SE | MMP3    | 24.5 | 2 | 0 | 0 | 0.7<br>41<br>22<br>8 | FA<br>LS<br>E | 0 | MMP3    | 1<br>8<br>4 | 0.5731<br>7073 | gen<br>e |
| 1<br>8<br>9 | 2.578947 | 0.0029<br>31 | 0.387<br>755 | 0 | 2 | 5 | FAL<br>SE | CYP1A1  | 23   | 2 | 0 | 0 | 0.7<br>36<br>84<br>2 | FA<br>LS<br>E | 0 | CYP1A1  | 2<br>9<br>4 | 0.55           | gen<br>e |
| 1<br>9<br>1 | 2.578947 | 0.0029<br>31 | 0.387<br>755 | 0 | 2 | 5 | FAL<br>SE | CYP19A1 | 23   | 2 | 0 | 0 | 0.7<br>36<br>84<br>2 | FA<br>LS<br>E | 0 | CYP19A1 | 2<br>9<br>4 | 0.55           | gen<br>e |
| 1<br>9<br>5 | 2.578947 | 0.0029<br>31 | 0.387<br>755 | 0 | 2 | 5 | FAL<br>SE | CYP1B1  | 23   | 2 | 0 | 0 | 0.7<br>36<br>84<br>2 | FA<br>LS<br>E | 0 | CYP1B1  | 2<br>9<br>4 | 0.55           | gen<br>e |
| 1<br>9<br>7 | 2.578947 | 0.0029<br>31 | 0.387<br>755 | 0 | 2 | 5 | FAL<br>SE | ALOX5   | 23   | 2 | 0 | 0 | 0.7<br>36<br>84<br>2 | FA<br>LS<br>E | 0 | ALOX5   | 2<br>9<br>4 | 0.55           | gen<br>e |
| 2<br>3<br>3 | 2.578947 | 0.0019<br>96 | 0.387<br>755 | 0 | 2 | 5 | FAL<br>SE | HSPB1   | 23   | 2 | 0 | 0 | 0.7<br>36<br>84<br>2 | FA<br>LS<br>E | 0 | HSPB1   | 1<br>2<br>2 | 0.55           | gen<br>e |
| 2<br>4<br>8 | 2.552632 | 0.0015<br>52 | 0.391<br>753 | 0 | 2 | 5 | FAL<br>SE | PIK3CG  | 24.5 | 2 | 0 | 0 | 0.7<br>41<br>22<br>8 | FA<br>LS<br>E | 0 | PIK3CG  | 1<br>6<br>2 | 0.5731<br>7073 | gen<br>e |
| 2<br>9<br>4 | 2.473684 | 0.0039<br>82 | 0.404<br>255 | 0 | 2 | 5 | FAL<br>SE | ALOX15  | 26.5 | 2 | 0 | 0 | 0.7<br>54<br>38<br>6 | FA<br>LS<br>E | 0 | ALOX15  | 3<br>6<br>2 | 0.5795<br>4545 | gen<br>e |
| 2           | 2.473684 | 0.0039       | 0.404        | 0 | 2 | 5 | FAL       | GPR35   | 26.5 | 2 | 0 | 0 | 0.7                  | FA            | 0 | GPR35   | 3           | 0.5795         | gen      |

|     |          |          |          |   |   |   |           |         |      |   |   |   |          |               |   |         |     |            |          |
|-----|----------|----------|----------|---|---|---|-----------|---------|------|---|---|---|----------|---------------|---|---------|-----|------------|----------|
| 98  |          | 82       | 255      |   |   |   | SE        |         |      |   |   |   | 54386    | LS<br>E       |   |         | 62  | 4545       | e        |
| 300 | 2.473684 | 0.003982 | 0.404255 | 0 | 2 | 5 | FAL<br>SE | TOP1    | 26.5 | 2 | 0 | 0 | 0.754386 | FA<br>LS<br>E | 0 | TOP1    | 362 | 0.57954545 | gene     |
| 376 | 3.907895 | 0.005203 | 0.255892 | 0 | 2 | 5 | FAL<br>SE | butin   | 4    | 2 | 0 | 0 | 0.515351 | FA<br>LS<br>E | 0 | butin   | 756 | 0.5        | compound |
| 377 | 3.894737 | 0.001727 | 0.256757 | 0 | 2 | 6 | FAL<br>SE | PTGS1   | 3    | 2 | 0 | 0 | 0.517544 | FA<br>LS<br>E | 0 | PTGS1   | 102 | 0.5        | gene     |
| 303 | 3.473684 | 0        | 0.287879 | 0 | 1 | 6 | FAL<br>SE | TYR     | 13   | 1 | 0 | 0 | 0.587719 | FA<br>LS<br>E | 0 | TYR     | 0   | 0          | gene     |
| 306 | 3.473684 | 0        | 0.287879 | 0 | 1 | 6 | FAL<br>SE | APP     | 13   | 1 | 0 | 0 | 0.587719 | FA<br>LS<br>E | 0 | APP     | 0   | 0          | gene     |
| 319 | 2.631579 | 0        | 0.38     | 0 | 1 | 5 | FAL<br>SE | XDH     | 40   | 1 | 0 | 0 | 0.72807  | FA<br>LS<br>E | 0 | XDH     | 0   | 0          | gene     |
| 323 | 2.631579 | 0        | 0.38     | 0 | 1 | 5 | FAL<br>SE | AHR     | 40   | 1 | 0 | 0 | 0.72807  | FA<br>LS<br>E | 0 | AHR     | 0   | 0          | gene     |
| 328 | 2.631579 | 0        | 0.38     | 0 | 1 | 5 | FAL<br>SE | CSNK2A1 | 40   | 1 | 0 | 0 | 0.72807  | FA<br>LS<br>E | 0 | CSNK2A1 | 0   | 0          | gene     |
| 3   | 2.631579 | 0        | 0.38     | 0 | 1 | 5 | FAL       | PON1    | 40   | 1 | 0 | 0 | 0.7      | FA            | 0 | PON1    | 0   | 0          | gen      |

|     |          |   |      |   |   |   |           |        |    |   |   |   |         |               |   |        |   |   |      |
|-----|----------|---|------|---|---|---|-----------|--------|----|---|---|---|---------|---------------|---|--------|---|---|------|
| 30  |          |   |      |   |   |   | SE        |        |    |   |   |   | 2807    | LS<br>E       |   |        |   |   | e    |
| 332 | 2.631579 | 0 | 0.38 | 0 | 1 | 5 | FAL<br>SE | MPO    | 40 | 1 | 0 | 0 | 0.72807 | FA<br>LS<br>E | 0 | MPO    | 0 | 0 | gene |
| 334 | 2.631579 | 0 | 0.38 | 0 | 1 | 5 | FAL<br>SE | ACHE   | 40 | 1 | 0 | 0 | 0.72807 | FA<br>LS<br>E | 0 | ACHE   | 0 | 0 | gene |
| 336 | 2.631579 | 0 | 0.38 | 0 | 1 | 5 | FAL<br>SE | ABCG2  | 40 | 1 | 0 | 0 | 0.72807 | FA<br>LS<br>E | 0 | ABCG2  | 0 | 0 | gene |
| 338 | 2.631579 | 0 | 0.38 | 0 | 1 | 5 | FAL<br>SE | CYP1A2 | 40 | 1 | 0 | 0 | 0.72807 | FA<br>LS<br>E | 0 | CYP1A2 | 0 | 0 | gene |
| 341 | 2.631579 | 0 | 0.38 | 0 | 1 | 5 | FAL<br>SE | TOP2A  | 40 | 1 | 0 | 0 | 0.72807 | FA<br>LS<br>E | 0 | TOP2A  | 0 | 0 | gene |
| 345 | 2.631579 | 0 | 0.38 | 0 | 1 | 5 | FAL<br>SE | NR1I2  | 40 | 1 | 0 | 0 | 0.72807 | FA<br>LS<br>E | 0 | NR1I2  | 0 | 0 | gene |
| 347 | 2.631579 | 0 | 0.38 | 0 | 1 | 5 | FAL<br>SE | CYP3A4 | 40 | 1 | 0 | 0 | 0.72807 | FA<br>LS<br>E | 0 | CYP3A4 | 0 | 0 | gene |
| 350 | 2.631579 | 0 | 0.38 | 0 | 1 | 5 | FAL<br>SE | F2     | 40 | 1 | 0 | 0 | 0.72807 | FA<br>LS<br>E | 0 | F2     | 0 | 0 | gene |
| 352 | 2.631579 | 0 | 0.38 | 0 | 1 | 5 | FAL<br>SE | APEX1  | 40 | 1 | 0 | 0 | 0.72807 | FA<br>LS<br>E | 0 | APEX1  | 0 | 0 | gene |
| 354 | 2.631579 | 0 | 0.38 | 0 | 1 | 5 | FAL<br>SE | AKR1B1 | 40 | 1 | 0 | 0 | 0.72807 | FA<br>LS<br>E | 0 | AKR1B1 | 0 | 0 | gene |
| 3   | 2.631579 | 0 | 0.38 | 0 | 1 | 5 | FAL       | PARP1  | 40 | 1 | 0 | 0 | 0.7     | FA            | 0 | PARP1  | 0 | 0 | gen  |

|     |          |   |          |   |   |   |           |       |    |   |   |   |          |               |   |       |   |   |          |
|-----|----------|---|----------|---|---|---|-----------|-------|----|---|---|---|----------|---------------|---|-------|---|---|----------|
| 60  |          |   |          |   |   |   | SE        |       |    |   |   |   | 2807     | LS<br>E       |   |       |   |   | e        |
| 362 | 2.631579 | 0 | 0.38     | 0 | 1 | 5 | FAL<br>SE | HSF1  | 40 | 1 | 0 | 0 | 0.72807  | FA<br>LS<br>E | 0 | HSF1  | 0 | 0 | gen<br>e |
| 370 | 3.868421 | 0 | 0.258503 | 0 | 1 | 6 | FAL<br>SE | CBR1  | 4  | 1 | 0 | 0 | 0.52193  | FA<br>LS<br>E | 0 | CBR1  | 0 | 0 | gen<br>e |
| 384 | 4.026316 | 0 | 0.248366 | 0 | 1 | 6 | FAL<br>SE | CHEK1 | 4  | 1 | 0 | 0 | 0.495614 | FA<br>LS<br>E | 0 | CHEK1 | 0 | 0 | gen<br>e |
