# Supplementary material for: Pharmacological Mechanisms Underlying the Hepatoprotective Effects of Ecliptae herba on Hepatocellular Carcinoma
Source: Evid Based Complement Alternat Med. 2021 Jul 16;2021:5591402. doi: 10.1155/2021/5591402 (PMC8302389; doi:10.1155/2021/5591402)
Supplement: Supplementary Materials — Supplementary File S1: a total of 48 chemical ingredients of EH were obtained from TCMSP. Supplementary File S2: detailed information of the targets of 6 active ingredients in EH was extracted from three databases, TCMSP, DGIDB, and SwissTargetPrediction. Supplementary File S3: detailed information on HCC-related targets was extracted from GeneCards and CTD. Supplementary File S4: detailed information on the PPI network of 52 potential therapeutic targets for HCC was obtained from the STRING platform. Supplementary File S5: topological parameters of nodes in the E-H network obtained from Cytoscape. Supplementary File S6: detailed information on GO enrichment analysis obtained from WebGestalt. Supplementary File S7: detailed information on the top 10 GO terms of the GO network in the TCGA RNASeq LIHC database through Network Topology-based Analysis obtained from WebGestalt. Supplementary File S8: detailed information on the top 20 KEGG enrichment pathways obtained from the WebGestalt. Supplementary File S9: detailed information on the C-T-P network obtained from Cytoscape. [file 5591402.f1.zip › 5591402.f1/supplementary materails description.txt]

Supplementary File S1. A total of 48 chemical ingredients of EH were collected from TCMSP.pdf

Supplementary File S2. The detailed information of targets of 6 active ingredients in EH were extracted from three databases, TCMSP, DGIDB and SWISSTARGETPREDICT.pdf

Supplementary File S3.The detailed information of HCC-related targets were extracted from genecards and ctd.pdf

Supplementary File S4. Detailed information on the PPI network of 52 potential therapeutic targets for HCC was obtained from the STRING platform.pdf

Supplementary File S5. Topological parameters of nodes in E-H network obtained from cytoscape.pdf

Supplementary File S6. Detailed information of GO enrichment analysis obtained from WebGestalt.pdf

Supplementary File S7. Detailed information of top 10 GO terms of GO network in the TCGA RNASeq LIHC database through Network Topology-based Analysis obtained from WebGestalt.pdf

Supplementary File S8. Detailed  information of top 20 KEGG enrichment pathways obtained from WebGestalt.pdf

Supplementary File S9. Detailed information of C-T-P network obtained from Cytoscape.pdf

Summary of the original picture of western blot assay.pdf
